# Supplementary material for: The Crystal Cargo Reveals the Build-up Phase to Caldera-Forming Mafic Eruptions
Source: Research Square preprint supplement (doi:10.21203/rs.3.rs-5186523/v1), 2024-10-21
Supplement: Supplementary file 1 [file Supplementary_Data_S3-S4-S5-cpx_data.xlsx]

## Sheet: S3-Majors
Index	Name	Sample	Crystal	Unit	Subunit	SiO2 (wt%)	CaO (wt%)	Na2O (wt%)	MnO (wt%)	FeO (wt%)	MgO (wt%)	Al2O3 (wt%)	Cr2O3 (wt%)	TiO2 (wt%)	OxideTotals (wt%)	Si_cat	Ca_cat	Na_cat	Mn_cat	Fe_cat	Mg_cat	Al_cat	Cr_cat	Ti_cat	Cations Sum	Mgnum	P (kbar)	16_Percentile - P (kbar)	84_Percentile - P (kbar)	T (C)	16_Percentile - T (C)	84_Percentile - T (C)
1	Line 1 20MAL-13M-28317_area2a-line1	20MAL13m-28317	2A	VSN	VSN0	45.19	22.69	0.823	0.644	13.87	8.38	6.33	0.036	1.128	99.091	1.77153	0.952936	0.0625483	0.0213812	0.454723	0.489752	0.292443	0.00111572	0.0332631	4.0797	0.518544	2.33677	2.05504	2.69469	902.746	891.504	911.477
2	Line 4 20MAL-13M-28317_area2a-line1	20MAL13m-28317	2A	VSN	VSN0	46.92	23.37	0.699	0.546	12.55	9.75	5.59	0	1.033	100.477	1.79904	0.959981	0.0519598	0.0177302	0.402429	0.557329	0.252594	0	0.029794	4.07085	0.580697	2.55222	2.12744	3.03283	829.469	821.78	837.501
3	Line 5 20MAL-13M-28317_area2a-line1	20MAL13m-28317	2A	VSN	VSN0	46.76	23.41	0.688	0.544	12.62	9.32	5.85	0	1.094	100.295	1.79658	0.963598	0.0512471	0.0177015	0.405504	0.533843	0.264886	0	0.0316181	4.06498	0.568313	2.10559	1.81015	2.51763	817.87	809.561	826.855
4	Line 6 20MAL-13M-28317_area2a-line1	20MAL13m-28317	2A	VSN	VSN0	46.91	23.27	0.71	0.567	12.57	9.66	5.51	0.021	0.987	100.218	1.80328	0.958334	0.0529134	0.0184595	0.404108	0.553606	0.249621	0.000638209	0.0285405	4.0695	0.578049	2.75296	2.38377	3.18952	851.808	844.101	860.487
5	Line 7 20MAL-13M-28317_area2a-line1	20MAL13m-28317	2A	VSN	VSN0	46.91	23.43	0.639	0.519	12.47	9.73	5.56	0	1.012	100.29	1.80116	0.963789	0.047566	0.0168769	0.400422	0.556962	0.251589	0	0.029229	4.0676	0.581754	2.07224	1.71032	2.54383	836.167	828.901	843.018
6	Line 8 20MAL-13M-28317_area2a-line1	20MAL13m-28317	2A	VSN	VSN0	46.8	23.44	0.717	0.561	12.58	9.62	5.47	0	1.016	100.222	1.80066	0.966198	0.0534828	0.0182805	0.404791	0.551806	0.24803	0	0.0294054	4.07266	0.576843	2.5487	2.1213	2.94433	827.028	819.218	834.332
7	Line 9 20MAL-13M-28317_area2a-line1	20MAL13m-28317	2A	VSN	VSN0	46.94	23.29	0.651	0.527	12.53	9.74	5.49	0	1.003	100.195	1.80397	0.958912	0.0485039	0.0171529	0.402719	0.558047	0.248651	0	0.0289958	4.06696	0.580836	2.1573	1.78816	2.64573	835.057	828.03	841.206
8	Line 10 20MAL-13M-28317_area2a-line1	20MAL13m-28317	2A	VSN	VSN0	46.83	23.36	0.703	0.537	12.57	9.63	5.47	0	0.993	100.111	1.80283	0.963442	0.052468	0.0175083	0.404697	0.552691	0.248169	0	0.0287559	4.07056	0.57729	2.54671	2.11533	2.97581	832.365	824.892	838.328
9	Line 11 20MAL-13M-28317_area2a-line1	20MAL13m-28317	2A	VSN	VSN0	46.99	23.38	0.745	0.551	12.34	9.75	5.32	0	0.961	100.046	1.80821	0.963851	0.0555787	0.017957	0.397121	0.559336	0.24126	0	0.0278172	4.07113	0.5848	2.78471	2.34034	3.21276	833.038	825.504	839.558
10	Line 12 20MAL-13M-28317_area2a-line1	20MAL13m-28317	2A	VSN	VSN0	47.16	23.39	0.641	0.511	12.39	9.75	5.34	0	0.971	100.18	1.81117	0.962361	0.0477257	0.0166206	0.397943	0.558233	0.241689	0	0.0280512	4.0638	0.583818	2.07792	1.74758	2.52455	840.615	834.907	846.209
11	Line 13 20MAL-13M-28317_area2a-line1	20MAL13m-28317	2A	VSN	VSN0	46.71	23.37	0.715	0.538	12.44	9.68	5.48	0	1.044	100.016	1.80002	0.964824	0.0534173	0.0175585	0.400914	0.556119	0.248873	0	0.0302632	4.07199	0.581086	2.57119	2.11073	3.02017	831.711	824.211	838.365
12	Line 14 20MAL-13M-28317_area2a-line1	20MAL13m-28317	2A	VSN	VSN0	46.97	23.32	0.688	0.523	12.27	9.82	5.43	0	1.05	100.085	1.80523	0.960202	0.0512636	0.0170236	0.394385	0.562663	0.245947	0	0.0303562	4.06707	0.587915	2.42638	2.02438	2.88355	836.859	829.775	843.486
13	Line 15 20MAL-13M-28317_area2a-line1	20MAL13m-28317	2A	VSN	VSN0	47.03	23.36	0.687	0.542	12.34	9.81	5.46	0	1.035	100.271	1.80462	0.960298	0.0511065	0.0176137	0.395995	0.561184	0.246907	0	0.0298743	4.0676	0.586289	2.4745	2.05102	2.93091	833.318	825.477	839.968
14	Line 16 20MAL-13M-28317_area2a-line1	20MAL13m-28317	2A	VSN	VSN0	46.83	23.33	0.712	0.504	12.21	9.77	5.45	0	1.044	99.879	1.80402	0.962837	0.0531746	0.0164432	0.393365	0.561094	0.247425	0	0.0302526	4.06861	0.587866	2.60169	2.15786	3.08421	839.144	832.619	845.168
15	Line 17 20MAL-13M-28317_area2a-line1	20MAL13m-28317	2A	VSN	VSN0	46.66	23.32	0.723	0.505	12.46	9.69	5.61	0	1.079	100.055	1.79647	0.961893	0.0539663	0.0164667	0.401197	0.556192	0.254548	0	0.0312496	4.07199	0.580947	2.62028	2.1796	3.08497	835.301	828.179	840.962
16	Line 18 20MAL-13M-28317_area2a-line1	20MAL13m-28317	2A	VSN	VSN0	45.37	23.19	0.701	0.534	13.23	8.85	6.79	0.021	1.393	100.1	1.75515	0.961101	0.0525742	0.0174955	0.428026	0.510405	0.309561	0.00064226	0.0405363	4.0755	0.543892	1.67895	1.5296	1.91981	833.209	823.925	843.114
17	Line 19 20MAL-13M-28317_area2a-line1	20MAL13m-28317	2A	VSN	VSN0	44.9	23.17	0.694	0.539	13.75	8.28	7.17	0	1.5	100.029	1.74339	0.963821	0.0522416	0.0177246	0.446493	0.479296	0.328094	0	0.0438113	4.07487	0.517716	1.35221	1.28471	1.51423	803.983	799.94	810.344
18	Line 20 20MAL-13M-28317_area2a-line1	20MAL13m-28317	2A	VSN	VSN0	46.28	23.38	0.672	0.566	12.54	9.39	6	0.031	1.115	100.021	1.78521	0.966187	0.0502542	0.0184906	0.404535	0.539989	0.272757	0.000945369	0.0323531	4.07072	0.571705	2.39994	2.14823	2.7493	874.019	859.495	887.528
19	Line 21 20MAL-13M-28317_area2a-line1	20MAL13m-28317	2A	VSN	VSN0	46.15	23.19	0.697	0.532	12.84	9.05	6.12	0.034	1.216	99.829	1.78428	0.960537	0.0522435	0.0174197	0.415164	0.521633	0.278851	0.00103924	0.0353648	4.06653	0.556826	2.21772	2.02432	2.53467	894.725	881.239	907.702
20	Line 22 20MAL-13M-28317_area2a-line1	20MAL13m-28317	2A	VSN	VSN0	46.29	23.24	0.709	0.537	12.7	9.31	5.99	0	1.146	99.965	1.78688	0.961093	0.0530594	0.0175558	0.409991	0.535775	0.272499	0	0.0332766	4.07013	0.566498	2.11781	1.81875	2.51384	811.667	802.221	821.088
21	Line 23 20MAL-13M-28317_area2a-line1	20MAL13m-28317	2A	VSN	VSN0	46.62	23.24	0.695	0.545	12.52	9.75	5.75	0	1.101	100.239	1.79193	0.956989	0.0517895	0.0177412	0.402454	0.558699	0.260463	0	0.0318333	4.0719	0.58128	2.44057	1.98771	2.89117	823.954	815.309	832.152
22	Line 24 20MAL-13M-28317_area2a-line1	20MAL13m-28317	2A	VSN	VSN0	44.78	23.15	0.743	0.538	13.93	8.4	7.07	0.036	1.506	100.153	1.73885	0.963054	0.0559339	0.0176929	0.452369	0.486275	0.323539	0.00110516	0.0439895	4.08281	0.518061	1.95654	1.81857	2.15683	897.84	887.682	907.624
23	Line 25 20MAL-13M-28317_area2a-line1	20MAL13m-28317	2A	VSN	VSN0	45.99	22.9	0.797	0.59	13.98	8.44	6.23	0	1.137	100.066	1.78275	0.951009	0.0598954	0.0193695	0.453208	0.487747	0.284607	0	0.0331538	4.07174	0.518353	1.90268	1.61503	2.29142	796.333	791.796	802.921
24	Line 26 20MAL-13M-28317_area2a-line1	20MAL13m-28317	2A	VSN	VSN0	45.19	22.89	0.808	0.601	13.92	8.28	6.54	0	1.238	99.468	1.76519	0.957893	0.0611884	0.0198821	0.454728	0.482175	0.301063	0	0.0363761	4.0785	0.514647	1.65975	1.45998	2.0152	791.991	788.94	796.484
25	Line 27 20MAL-13M-28317_area2a-line1	20MAL13m-28317	2A	VSN	VSN0	46.84	23.19	0.741	0.576	12.95	9.32	5.31	0	0.896	99.824	1.81095	0.960532	0.0555412	0.0188604	0.418719	0.537192	0.241943	0	0.0260581	4.06979	0.561969	2.63907	2.24628	3.08832	823.213	815.471	831.219
26	Line 2 20MAL-13M-28317_area2a-line2	20MAL13m-28317	2A	VSN	VSN0	45.09	22.84	0.929	0.609	14.1	8.26	6.77	0	1.242	99.868	1.75667	0.953294	0.070167	0.0200939	0.459401	0.479749	0.310833	0	0.0363979	4.0866	0.510833	1.88694	1.5817	2.35993	791.139	788.214	795.355
27	Line 3 20MAL-13M-28317_area2a-line2	20MAL13m-28317	2A	VSN	VSN0	45.04	23.01	0.738	0.581	14.11	8.23	6.68	0	1.329	99.751	1.7569	0.961584	0.0558102	0.0191939	0.460298	0.478601	0.307083	0	0.038996	4.07847	0.509747	1.55775	1.40925	1.76887	795.213	791.014	799.028
28	Line 4 20MAL-13M-28317_area2a-line2	20MAL13m-28317	2A	VSN	VSN0	45.09	22.88	0.804	0.594	14.05	8.33	6.7	0.019	1.341	99.81	1.75645	0.954845	0.0607182	0.0195966	0.457714	0.483754	0.307581	0.000585131	0.0392943	4.08054	0.513829	1.59983	1.43608	1.83341	832.642	826.137	839.478
29	Line 5 20MAL-13M-28317_area2a-line2	20MAL13m-28317	2A	VSN	VSN0	47.03	23.37	0.755	0.535	12.51	9.71	5.34	0	0.951	100.244	1.8078	0.9624	0.056264	0.0174168	0.402157	0.556441	0.241906	0	0.027498	4.07188	0.580474	2.85296	2.44716	3.32662	834.951	828.596	841.113
30	Line 6 20MAL-13M-28317_area2a-line2	20MAL13m-28317	2A	VSN	VSN0	47.26	23.28	0.696	0.565	12.51	9.79	5.16	0	0.89	100.166	1.81616	0.958442	0.0518535	0.0183886	0.402052	0.560878	0.23369	0	0.0257275	4.06719	0.58247	2.48851	2.07229	2.94947	832.618	824.18	839.405
31	Line 7 20MAL-13M-28317_area2a-line2	20MAL13m-28317	2A	VSN	VSN0	47.34	23.26	0.734	0.569	12.59	9.69	5.19	0	0.887	100.265	1.81755	0.956729	0.0546338	0.0185016	0.404247	0.554633	0.234831	0	0.0256169	4.06674	0.578418	2.72077	2.2822	3.19611	831.126	822.735	837.921
32	Line 8 20MAL-13M-28317_area2a-line2	20MAL13m-28317	2A	VSN	VSN0	47.36	23.23	0.668	0.568	12.74	9.63	5.18	0	0.889	100.281	1.81873	0.955713	0.0497326	0.0184733	0.409156	0.551325	0.234432	0	0.0256805	4.06324	0.574009	2.22114	1.89783	2.71304	830.367	821.931	837.367
33	Line 9 20MAL-13M-28317_area2a-line2	20MAL13m-28317	2A	VSN	VSN0	47.49	23.2	0.735	0.558	12.66	9.58	5.16	0	0.854	100.243	1.82308	0.954143	0.0547015	0.0181416	0.406444	0.54827	0.233444	0	0.0246608	4.06289	0.574276	2.81605	2.37443	3.29939	833.491	825.135	840.479
34	Line 10 20MAL-13M-28317_area2a-line2	20MAL13m-28317	2A	VSN	VSN0	47.49	23.28	0.754	0.553	12.77	9.64	5.08	0	0.84	100.415	1.8217	0.956706	0.0560729	0.0179654	0.409664	0.551284	0.229651	0	0.0242381	4.06728	0.573688	2.91351	2.49391	3.34992	835.91	827.665	842.334
35	Line 11 20MAL-13M-28317_area2a-line2	20MAL13m-28317	2A	VSN	VSN0	47.46	23.18	0.767	0.572	12.83	9.49	5.14	0	0.86	100.325	1.82259	0.953668	0.0571039	0.0186036	0.412052	0.543317	0.232624	0	0.0248431	4.0648	0.568698	2.88152	2.48487	3.32013	830.561	821.503	836.573
36	Line 12 20MAL-13M-28317_area2a-line2	20MAL13m-28317	2A	VSN	VSN0	45.78	23.08	0.763	0.641	14.02	8.5	5.97	0	1.149	99.921	1.78077	0.961812	0.0575394	0.0211169	0.456083	0.49292	0.273676	0	0.0336201	4.07754	0.519408	1.75498	1.52465	2.06599	795.077	790.891	801.154
37	Line 13 20MAL-13M-28317_area2a-line2	20MAL13m-28317	2A	VSN	VSN0	47.21	23.12	0.799	0.582	13	9.62	4.75	0	0.806	99.897	1.82419	0.957077	0.0598539	0.0190458	0.420092	0.554162	0.216302	0	0.0234271	4.07415	0.568807	3.11036	2.75226	3.5243	834.949	826.534	841.395
38	Line 14 20MAL-13M-28317_area2a-line2	20MAL13m-28317	2A	VSN	VSN0	47.59	23.08	0.85	0.573	13.17	9.52	4.67	0.032	0.765	100.256	1.83195	0.951824	0.0634346	0.0186807	0.423983	0.546337	0.211858	0.000973854	0.0221517	4.0712	0.563048	4.17428	3.79915	4.51715	913.71	901.134	924.01
39	Line 15 20MAL-13M-28317_area2a-line2	20MAL13m-28317	2A	VSN	VSN0	48.3	22.92	0.9	0.609	13.3	9.55	4.73	0	0.717	101.026	1.84183	0.936353	0.0665356	0.0196679	0.424149	0.542914	0.212566	0	0.0205669	4.06459	0.561405	3.74041	3.34018	4.15132	829.237	822.833	837.799
40	Line 16 20MAL-13M-28317_area2a-line2	20MAL13m-28317	2A	VSN	VSN0	47.67	23.11	0.869	0.593	13.21	9.45	4.8	0	0.777	100.482	1.83073	0.950825	0.0647004	0.0192873	0.424273	0.541048	0.217245	0	0.0224464	4.07055	0.560485	3.39128	3.00685	3.82337	830.979	823.096	839.151
41	Line 17 20MAL-13M-28317_area2a-line2	20MAL13m-28317	2A	VSN	VSN0	47.87	22.4	1.074	0.643	13.93	8.95	4.68	0	0.589	100.165	1.84737	0.926105	0.0803532	0.0210155	0.449578	0.514918	0.212846	0	0.0170983	4.06929	0.533873	4.49511	4.00905	5.05028	814.413	807.635	823.459
42	Line 20 20MAL-13M-28317_area2a-line2	20MAL13m-28317	2A	VSN	VSN0	47.37	22.83	0.926	0.677	14.36	8.7	5.17	0	0.691	100.733	1.82394	0.941748	0.0691236	0.0220767	0.462407	0.499403	0.2346	0	0.0200139	4.07331	0.519232	3.41611	2.96632	3.95404	800.29	792.713	807.525
43	Line 21 20MAL-13M-28317_area2a-line2	20MAL13m-28317	2A	VSN	VSN0	48.27	22.66	1.003	0.701	14.41	8.72	3.94	0	0.51	100.253	1.86652	0.938724	0.0751909	0.0229569	0.465998	0.502687	0.179549	0	0.0148345	4.06646	0.518938	4.06647	3.74587	4.48099	798.182	791.118	806.01
44	Line 31 20MAL-13M-28317_area2c-line1	20MAL13m-28317	2C	VSN	VSN0	45.28	23.07	0.774	0.541	14.02	8.18	6.89	0	1.128	99.885	1.76095	0.96119	0.0583565	0.0178187	0.455986	0.474262	0.315783	0	0.0329986	4.07734	0.509823	2.0906	1.75461	2.48473	797.171	793.606	802.065
45	Line 30 20MAL-13M-28317_area2c-line1	20MAL13m-28317	2C	VSN	VSN0	44.92	23.07	0.719	0.553	14.01	8.04	7.14	0	1.237	99.727	1.75119	0.963528	0.0543415	0.0182582	0.456769	0.467278	0.328037	0	0.0362753	4.07568	0.505687	1.71631	1.51026	2.0599	798.264	794.165	803.733
46	Line 29 20MAL-13M-28317_area2c-line1	20MAL13m-28317	2C	VSN	VSN0	45.36	23.13	0.757	0.565	13.72	8.3	6.66	0	1.242	99.757	1.76496	0.964183	0.057104	0.0186187	0.446457	0.481465	0.305398	0	0.0363521	4.07454	0.518864	1.63873	1.47985	1.94866	794.882	790.588	799.585
47	Line 28 20MAL-13M-28317_area2c-line1	20MAL13m-28317	2C	VSN	VSN0	46	23.14	0.778	0.552	13.56	8.63	6.32	0.032	1.226	100.248	1.77752	0.957946	0.0582833	0.0180648	0.438207	0.497155	0.287808	0.000977577	0.0356363	4.0716	0.531511	2.20735	2.01105	2.53435	886.968	874.954	899.222
48	Line 27 20MAL-13M-28317_area2c-line1	20MAL13m-28317	2C	VSN	VSN0	45.92	23.15	0.753	0.549	13.58	8.59	6.62	0	1.222	100.396	1.77138	0.956713	0.0563134	0.0179358	0.438099	0.494	0.300952	0	0.035459	4.07085	0.529987	1.80345	1.58484	2.18851	795.669	790.879	801.818
49	Line 26 20MAL-13M-28317_area2c-line1	20MAL13m-28317	2C	VSN	VSN0	45.29	23.19	0.768	0.544	13.76	8.39	6.84	0	1.259	100.041	1.75735	0.964005	0.0577732	0.017877	0.446518	0.485337	0.312783	0	0.0367476	4.07839	0.520829	1.65653	1.47055	2.0013	795.921	791.775	801.652
50	Line 25 20MAL-13M-28317_area2c-line1	20MAL13m-28317	2C	VSN	VSN0	44.64	23.15	0.729	0.523	14.12	8	7.58	0	1.404	100.151	1.73384	0.963293	0.0548935	0.0172039	0.458652	0.463234	0.346964	0	0.0410203	4.0791	0.502485	1.47448	1.35965	1.78751	813.754	807.68	819.87
51	Line 24 20MAL-13M-28317_area2c-line1	20MAL13m-28317	2C	VSN	VSN0	44.56	23.23	0.767	0.489	14.15	7.93	7.65	0	1.438	100.252	1.73041	0.966438	0.0577439	0.0160824	0.459539	0.459093	0.350102	0	0.0420057	4.08141	0.499757	1.48472	1.36778	1.79921	819.668	814.214	824.191
52	Line 23 20MAL-13M-28317_area2c-line1	20MAL13m-28317	2C	VSN	VSN0	44.22	23.19	0.644	0.529	14.11	7.99	7.78	0	1.42	99.889	1.72333	0.968217	0.0486569	0.01746	0.459876	0.464218	0.357322	0	0.0416279	4.08071	0.502349	1.38306	1.26939	1.65216	819.483	813.673	824.833
53	Line 22 20MAL-13M-28317_area2c-line1	20MAL13m-28317	2C	VSN	VSN0	44.27	23.2	0.746	0.473	13.88	8.08	7.84	0.026	1.488	100.012	1.72144	0.96648	0.056238	0.015577	0.451374	0.468403	0.359277	0.000799284	0.0435243	4.08311	0.509257	1.71221	1.54353	2.00246	875.454	869.207	882.278
54	Line 21 20MAL-13M-28317_area2c-line1	20MAL13m-28317	2C	VSN	VSN0	42.86	23.28	0.695	0.43	14.07	7.68	8.96	0	1.82	99.796	1.6754	0.974925	0.0526695	0.0142355	0.459964	0.447561	0.412766	0	0.053516	4.09104	0.493167	1.37835	1.22859	1.53932	835.367	831.416	841.384
55	Line 20 20MAL-13M-28317_area2c-line1	20MAL13m-28317	2C	VSN	VSN0	42.54	23.19	0.669	0.431	14.15	7.51	9.18	0	1.93	99.6	1.66716	0.973648	0.0508293	0.0143052	0.463766	0.438777	0.423987	0	0.0568961	4.08937	0.486156	1.33324	1.21068	1.48266	834.21	830.457	841.048
56	Line 19 20MAL-13M-28317_area2c-line1	20MAL13m-28317	2C	VSN	VSN0	42.54	23.21	0.71	0.414	14.3	7.53	9.16	0.022	1.89	99.801	1.66572	0.973644	0.0538977	0.0137291	0.468277	0.439565	0.422697	0.000681037	0.0556687	4.09388	0.484187	1.55047	1.39359	1.76449	868.314	863.573	875.444
57	Line 18 20MAL-13M-28317_area2c-line1	20MAL13m-28317	2C	VSN	VSN0	42.4	23.24	0.624	0.4	14.3	7.39	9.44	0.022	1.96	99.785	1.65971	0.974595	0.0473542	0.0132606	0.468129	0.431256	0.43548	0.000680822	0.0577123	4.08818	0.479501	1.36688	1.24479	1.58078	870.646	864.338	878.448
58	Line 17 20MAL-13M-28317_area2c-line1	20MAL13m-28317	2C	VSN	VSN0	42.34	23.26	0.619	0.411	14.56	7.34	9.57	0	1.96	100.072	1.65463	0.973829	0.0468975	0.0136029	0.475857	0.427634	0.440751	0	0.0576174	4.09082	0.473313	1.25412	1.19856	1.43401	833.809	830.189	840.342
59	Line 16 20MAL-13M-28317_area2c-line1	20MAL13m-28317	2C	VSN	VSN0	42.2	23.29	0.624	0.389	14.4	7.38	9.54	0	1.99	99.826	1.65286	0.977273	0.0473824	0.0129037	0.471683	0.430929	0.440355	0	0.0586305	4.09202	0.477424	1.353	1.2224	1.54492	840.515	834.476	847.441
60	Line 15 20MAL-13M-28317_area2c-line1	20MAL13m-28317	2C	VSN	VSN0	42.33	23.2	0.669	0.402	14.38	7.3	9.63	0	1.99	99.949	1.65535	0.971965	0.0507195	0.0133139	0.470287	0.425587	0.44381	0	0.0585383	4.08957	0.475052	1.41614	1.25952	1.65565	837.471	832.052	844.018
61	Line 14 20MAL-13M-28317_area2c-line1	20MAL13m-28317	2C	VSN	VSN0	42.41	23.34	0.686	0.408	14.27	7.42	9.54	0	1.96	100.039	1.65616	0.976467	0.0519359	0.0134938	0.466039	0.43198	0.439049	0	0.0575754	4.0927	0.481036	1.44191	1.27079	1.67318	836.941	831.952	843.974
62	Line 13 20MAL-13M-28317_area2c-line1	20MAL13m-28317	2C	VSN	VSN0	42.26	23.27	0.675	0.434	14.39	7.31	9.54	0.025	1.93	99.855	1.65508	0.976352	0.0512508	0.0143952	0.471316	0.426806	0.440318	0.000774057	0.056858	4.09315	0.47522	1.60077	1.42255	1.77904	870.72	865.398	877.205
63	Line 12 20MAL-13M-28317_area2c-line1	20MAL13m-28317	2C	VSN	VSN0	42.33	23.25	0.689	0.38	14.43	7.32	9.57	0	1.93	99.913	1.65611	0.974507	0.0522598	0.0125911	0.472139	0.426949	0.441247	0	0.0567994	4.0926	0.474869	1.60542	1.38775	1.91869	841.834	835.103	850.779
64	Line 11 20MAL-13M-28317_area2c-line1	20MAL13m-28317	2C	VSN	VSN0	42.46	23.38	0.626	0.409	14.26	7.43	9.4	0.036	1.87	99.871	1.6608	0.979723	0.04747	0.0135487	0.466466	0.433262	0.433306	0.00111323	0.0550205	4.09071	0.481548	1.73457	1.59029	1.94017	903.797	897.29	910.972
65	Line 10 20MAL-13M-28317_area2c-line1	20MAL13m-28317	2C	VSN	VSN0	42.73	23.35	0.664	0.385	14.36	7.56	9.25	0.031	1.68	100.02	1.66869	0.976906	0.0502713	0.0127334	0.468988	0.44014	0.425712	0.000957085	0.0493514	4.09375	0.484134	1.90016	1.66299	2.20211	897.092	890.073	904.481
66	Line 9 20MAL-13M-28317_area2c-line1	20MAL13m-28317	2C	VSN	VSN0	42.56	23.31	0.657	0.39	14.48	7.44	9.28	0.018	1.72	99.86	1.66603	0.977562	0.0498602	0.0129296	0.474037	0.434188	0.428113	0.000557055	0.0506471	4.09392	0.478062	1.48071	1.28705	1.76597	863.806	857.655	871.52
67	Line 8 20MAL-13M-28317_area2c-line1	20MAL13m-28317	2C	VSN	VSN0	42.12	23.21	0.63	0.377	14.39	7.3	9.66	0.03	2.03	99.747	1.65048	0.97436	0.0478598	0.0125113	0.471571	0.426452	0.446097	0.00092937	0.0598363	4.0901	0.474879	1.68665	1.51302	1.95241	893.18	885.76	902.089
68	Line 7 20MAL-13M-28317_area2c-line1	20MAL13m-28317	2C	VSN	VSN0	41.22	23.14	0.655	0.397	14.77	7.11	10.02	0	2.29	99.612	1.62378	0.97657	0.0500228	0.0132449	0.486589	0.417554	0.465175	0	0.0678578	4.10079	0.461823	1.45347	1.26317	1.74498	837.17	831.469	843.813
69	Line 6 20MAL-13M-28317_area2c-line1	20MAL13m-28317	2C	VSN	VSN0	43.44	23.23	0.69	0.472	13.79	7.9	8.12	0	1.654	99.317	1.70366	0.976034	0.0524628	0.0156774	0.452295	0.461897	0.375301	0	0.048795	4.08612	0.505252	1.26973	1.18225	1.3747	832.733	828.523	837.046
70	Line 5 20MAL-13M-28317_area2c-line1	20MAL13m-28317	2C	VSN	VSN0	43.63	23.22	0.687	0.427	13.86	7.91	8.13	0	1.7	99.583	1.70567	0.972507	0.0520684	0.0141376	0.453143	0.46101	0.374567	0	0.0499924	4.08309	0.504303	1.31039	1.20799	1.48372	834.374	830.185	838.865
71	Line 4 20MAL-13M-28317_area2c-line1	20MAL13m-28317	2C	VSN	VSN0	43.56	23.21	0.618	0.434	13.83	7.94	8.2	0	1.69	99.517	1.70385	0.972617	0.0468642	0.0143772	0.452408	0.46301	0.377997	0	0.0497253	4.08085	0.505791	1.18721	1.14025	1.31387	837.238	832.898	841.942
72	Line 3 20MAL-13M-28317_area2c-line1	20MAL13m-28317	2C	VSN	VSN0	43.4	23.28	0.678	0.427	13.82	7.97	8.16	0	1.71	99.446	1.69978	0.976805	0.0514803	0.0141635	0.452663	0.465357	0.376637	0	0.0503785	4.08726	0.506914	1.2776	1.17756	1.46517	835.858	831.313	840.087
73	Line 2 20MAL-13M-28317_area2c-line1	20MAL13m-28317	2C	VSN	VSN0	43.64	23.23	0.673	0.431	13.83	7.88	8.19	0	1.72	99.594	1.70509	0.972376	0.0509784	0.014262	0.451907	0.459002	0.377118	0	0.0505519	4.08129	0.503894	1.28038	1.17777	1.46159	835.58	830.936	840.377
74	Line 1 20MAL-13M-28317_area2c-line1	20MAL13m-28317	2C	VSN	VSN0	43.58	23.28	0.671	0.455	13.87	7.97	8.14	0	1.69	99.674	1.7029	0.974557	0.0508316	0.0150575	0.453255	0.464286	0.37485	0	0.0496747	4.08541	0.506011	1.2456	1.16658	1.36352	833.484	829.876	837.724
75	Line 23 20MAL-13M-28317_area2c-line2	20MAL13m-28317	2C	VSN	VSN0	46.05	23.05	0.79	0.571	13.72	8.34	6.71	0	1.268	100.5	1.77434	0.951479	0.0590122	0.0186329	0.442104	0.479068	0.30469	0	0.0367512	4.06607	0.520064	1.67631	1.4935	2.04719	793.221	789.541	798.228
76	Line 22 20MAL-13M-28317_area2c-line2	20MAL13m-28317	2C	VSN	VSN0	44.59	23.09	0.826	0.566	13.99	7.9	7.6	0	1.491	100.071	1.73331	0.961577	0.0622481	0.0186334	0.454799	0.457815	0.348162	0	0.0435975	4.08014	0.501652	1.43064	1.35551	1.68963	809.092	803.522	814.899
77	Line 21 20MAL-13M-28317_area2c-line2	20MAL13m-28317	2C	VSN	VSN0	43.47	23.28	0.778	0.45	14.15	7.61	8.43	0	1.76	99.958	1.69645	0.973322	0.0588626	0.0148731	0.461819	0.442753	0.387712	0	0.0516667	4.08746	0.489461	1.41082	1.30631	1.61604	829.063	826.034	834.589
78	Line 20 20MAL-13M-28317_area2c-line2	20MAL13m-28317	2C	VSN	VSN0	44.26	23.36	0.674	0.451	13.57	8.09	7.66	0	1.523	99.592	1.7264	0.976168	0.050968	0.0148986	0.442663	0.470439	0.352118	0	0.0446865	4.07834	0.51521	1.33823	1.23744	1.55775	827.657	822.197	832.661
79	Line 19 20MAL-13M-28317_area2c-line2	20MAL13m-28317	2C	VSN	VSN0	44.61	23.4	0.655	0.416	13.41	8.13	7.46	0	1.522	99.62	1.73705	0.976154	0.0494459	0.0137187	0.43669	0.47195	0.342334	0	0.0445801	4.07192	0.519403	1.38879	1.23898	1.65029	827.64	822.278	832.71
80	Line 18 20MAL-13M-28317_area2c-line2	20MAL13m-28317	2C	VSN	VSN0	44.57	23.39	0.649	0.434	13.43	8.2	7.37	0	1.492	99.549	1.73735	0.976779	0.0490453	0.0143276	0.437808	0.476522	0.338565	0	0.0437481	4.07414	0.521171	1.3555	1.23282	1.57598	822.929	817.833	828.86
81	Line 17 20MAL-13M-28317_area2c-line2	20MAL13m-28317	2C	VSN	VSN0	44.23	23.33	0.702	0.429	13.33	8.12	7.35	0.033	1.507	99.048	1.73394	0.979835	0.0533534	0.0142434	0.437029	0.474567	0.339574	0.00102276	0.0444402	4.078	0.520589	2.04132	1.83656	2.31314	908.023	899.365	915.221
82	Line 16 20MAL-13M-28317_area2c-line2	20MAL13m-28317	2C	VSN	VSN0	44.52	23.4	0.657	0.424	13.46	8.32	7.49	0.041	1.529	99.863	1.73056	0.974472	0.0495114	0.0139584	0.437563	0.482147	0.343118	0.00125997	0.044708	4.0773	0.524238	2.12932	1.93682	2.39135	927.906	919.767	934.562
83	Line 15 20MAL-13M-28317_area2c-line2	20MAL13m-28317	2C	VSN	VSN0	44.35	23.51	0.708	0.412	13.58	8.23	7.56	0	1.503	99.866	1.72597	0.9802	0.0534173	0.0135793	0.441981	0.477491	0.346731	0	0.0439993	4.08337	0.51931	1.56238	1.35033	1.88215	828.998	823.73	834.152
84	Line 13 20MAL-13M-28317_area2c-line2	20MAL13m-28317	2C	VSN	VSN0	41.9	23.27	0.688	0.373	14.4	7.26	9.46	0	1.98	99.363	1.6509	0.982258	0.0525538	0.0124467	0.474497	0.426451	0.439267	0	0.0586839	4.09706	0.473336	1.63746	1.41315	1.97342	843.65	836.849	853.062
85	Line 12 20MAL-13M-28317_area2c-line2	20MAL13m-28317	2C	VSN	VSN0	42.08	23.26	0.633	0.385	14.42	7.33	9.29	0.02	1.98	99.406	1.65636	0.980867	0.0483048	0.0128345	0.474687	0.430137	0.430947	0.000622377	0.0586259	4.09338	0.475382	1.39382	1.24936	1.63756	869.711	862.776	877.751
86	Line 11 20MAL-13M-28317_area2c-line2	20MAL13m-28317	2C	VSN	VSN0	42.26	23.22	0.657	0.37	14.37	7.35	9.24	0.034	1.91	99.418	1.66193	0.97829	0.0500907	0.0123232	0.472611	0.430919	0.428239	0.00105708	0.0565019	4.09196	0.476928	1.91761	1.67062	2.17907	905.548	898.954	916.403
87	Line 10 20MAL-13M-28317_area2c-line2	20MAL13m-28317	2C	VSN	VSN0	42.35	23.31	0.686	0.37	14.19	7.37	9.06	0	1.93	99.27	1.66705	0.983014	0.0523514	0.0123349	0.467134	0.432502	0.420295	0	0.0571477	4.09183	0.480752	1.64969	1.38753	1.94808	844.451	838.671	854.024
88	Line 9 20MAL-13M-28317_area2c-line2	20MAL13m-28317	2C	VSN	VSN0	42.28	23.3	0.636	0.396	14.27	7.45	9.06	0	1.9	99.306	1.66469	0.982825	0.0485472	0.0132048	0.469879	0.4373	0.420394	0	0.0562728	4.09311	0.482044	1.32014	1.19706	1.52634	839.149	833.305	844.993
89	Line 8 20MAL-13M-28317_area2c-line2	20MAL13m-28317	2C	VSN	VSN0	42.21	23.37	0.631	0.386	14.23	7.42	9.03	0	1.92	99.204	1.66389	0.98694	0.0482223	0.0128865	0.469114	0.436053	0.419496	0	0.0569322	4.09354	0.481737	1.34012	1.20124	1.54532	840.892	835.202	847.478
90	Line 7 20MAL-13M-28317_area2c-line2	20MAL13m-28317	2C	VSN	VSN0	42.17	23.35	0.658	0.419	14.25	7.27	9.21	0.026	2	99.354	1.65997	0.984703	0.0502147	0.0139685	0.46911	0.426634	0.427254	0.000809124	0.0592206	4.09189	0.47629	1.56458	1.39967	1.78334	878.397	871.883	884.936
91	Line 6 20MAL-13M-28317_area2c-line2	20MAL13m-28317	2C	VSN	VSN0	41.91	23.33	0.664	0.387	14.38	7.14	9.38	0.019	1.98	99.191	1.65392	0.986356	0.0508011	0.0129344	0.474591	0.420068	0.436244	0.000592783	0.0587771	4.09428	0.469529	1.50116	1.29713	1.76249	864.856	858.06	873.711
92	Line 5 20MAL-13M-28317_area2c-line2	20MAL13m-28317	2C	VSN	VSN0	42.09	23.26	0.653	0.406	14.41	7.26	9.3	0.038	2.03	99.446	1.65611	0.980489	0.0498119	0.0135293	0.474175	0.425866	0.431245	0.00118206	0.0600833	4.0925	0.473163	1.85056	1.66631	2.05729	907.501	900.243	914.913
93	Line 4 20MAL-13M-28317_area2c-line2	20MAL13m-28317	2C	VSN	VSN0	42.02	23.18	0.709	0.403	14.31	7.15	9.31	0	2.06	99.151	1.65775	0.979712	0.0542272	0.013465	0.472135	0.420527	0.432855	0	0.0611331	4.0918	0.471093	1.53757	1.3694	1.77766	835.481	829.553	842.83
94	Line 3 20MAL-13M-28317_area2c-line2	20MAL13m-28317	2C	VSN	VSN0	44.04	23.46	0.684	0.401	13.54	8.24	7.93	0.025	1.581	99.91	1.71306	0.977631	0.051581	0.0132102	0.440461	0.477834	0.36352	0.000768794	0.0462598	4.08433	0.520349	1.68878	1.49652	1.97007	882.871	876.967	890.511
95	Line 2 20MAL-13M-28317_area2c-line2	20MAL13m-28317	2C	VSN	VSN0	43.19	23.42	0.574	0.387	13.71	7.85	8.47	0	1.75	99.362	1.6923	0.983112	0.0436028	0.0128423	0.449257	0.458552	0.391118	0	0.0515796	4.08236	0.505119	1.20286	1.14181	1.36425	845.972	841.159	850.597
96	Line 1 20MAL-13M-28317_area2c-line2	20MAL13m-28317	2C	VSN	VSN0	43.25	23.38	0.651	0.417	13.81	7.86	8.51	0	1.77	99.647	1.69049	0.979025	0.0493306	0.0138039	0.451424	0.45801	0.392001	0	0.0520412	4.08613	0.503621	1.24166	1.15253	1.40661	839.991	834.715	844.431
97	Line 23 20MAL-13M-28317_area2b-line1	20MAL13m-28317	2B	VSN	VSN0	45.21	23.77	0.46	0.209	11.58	9.94	7.78	0.023	1.565	100.537	1.72616	0.972295	0.0340497	0.00675822	0.369759	0.565794	0.350072	0.000694256	0.0449477	4.07053	0.604769	2.08543	1.84815	2.39222	993.898	982.913	1006.78
98	Line 22 20MAL-13M-28317_area2b-line1	20MAL13m-28317	2B	VSN	VSN0	44.89	23.97	0.441	0.201	11.57	9.93	7.77	0	1.56	100.337	1.71971	0.983773	0.0327531	0.00652139	0.370682	0.567125	0.350797	0	0.0449548	4.07632	0.604735	2.17034	1.94298	2.4806	976.463	959.807	994.997
99	Line 21 20MAL-13M-28317_area2b-line1	20MAL13m-28317	2B	VSN	VSN0	44.81	23.98	0.446	0.247	11.45	9.82	7.73	0	1.591	100.09	1.72097	0.986665	0.0332079	0.00803405	0.367763	0.562257	0.349871	0	0.0459637	4.07473	0.604565	1.94771	1.73324	2.23388	962.375	945.963	981.457
100	Line 20 20MAL-13M-28317_area2b-line1	20MAL13m-28317	2B	VSN	VSN0	44.87	23.99	0.469	0.18	11.54	9.92	7.71	0	1.595	100.274	1.72007	0.98524	0.0348555	0.00584388	0.369964	0.566926	0.348317	0	0.0459935	4.07721	0.605115	2.18175	1.94792	2.43234	975.038	959.008	992.579
101	Line 19 20MAL-13M-28317_area2b-line1	20MAL13m-28317	2B	VSN	VSN0	44.83	23.97	0.435	0.203	11.47	9.91	7.66	0	1.566	100.064	1.72206	0.986437	0.0323949	0.00660411	0.368474	0.567516	0.346768	0	0.0452499	4.0755	0.606327	2.08951	1.87201	2.38013	974.752	958.622	992.76
102	Line 18 20MAL-13M-28317_area2b-line1	20MAL13m-28317	2B	VSN	VSN0	44.81	23.93	0.408	0.234	11.53	9.92	7.7	0	1.573	100.116	1.72059	0.984391	0.0303719	0.00760952	0.370251	0.567858	0.348437	0	0.0454337	4.07494	0.605322	2.07235	1.84518	2.38026	971.674	954.871	991.499
103	Line 17 20MAL-13M-28317_area2b-line1	20MAL13m-28317	2B	VSN	VSN0	44.83	23.97	0.464	0.186	11.49	9.75	7.66	0	1.546	99.898	1.72469	0.987944	0.0346074	0.0060603	0.36968	0.559206	0.347297	0	0.0447402	4.07422	0.602018	2.16929	1.95905	2.43147	965.651	952.59	982.2
104	Line 16 20MAL-13M-28317_area2b-line1	20MAL13m-28317	2B	VSN	VSN0	44.85	23.85	0.416	0.206	11.61	9.82	7.69	0	1.566	100.031	1.72358	0.98193	0.0309936	0.00670465	0.373135	0.562609	0.348278	0	0.0452697	4.0725	0.601242	2.09564	1.87856	2.38068	967.49	953.421	985.175
105	Line 15 20MAL-13M-28317_area2b-line1	20MAL13m-28317	2B	VSN	VSN0	44.83	23.93	0.478	0.215	11.68	9.81	7.76	0	1.576	100.278	1.71956	0.98336	0.0355455	0.00698434	0.374675	0.560973	0.350784	0	0.0454727	4.07735	0.599556	2.07713	1.83746	2.37496	966.375	950.908	984.824
106	Line 14 20MAL-13M-28317_area2b-line1	20MAL13m-28317	2B	VSN	VSN0	44.61	23.95	0.482	0.2	11.57	9.72	7.72	0.025	1.603	99.884	1.7183	0.988314	0.0359934	0.00652433	0.372704	0.55816	0.350441	0.000761294	0.0464459	4.07765	0.599615	1.99373	1.7725	2.2253	991.702	983.146	1001.15
107	Line 13 20MAL-13M-28317_area2b-line1	20MAL13m-28317	2B	VSN	VSN0	44.59	24.01	0.454	0.217	11.43	9.43	7.48	0	1.558	99.18	1.72929	0.997575	0.0341347	0.00712738	0.370716	0.545215	0.341872	0	0.0454512	4.07139	0.595258	1.87813	1.70166	2.11865	942.493	930.348	956.272
108	Line 12 20MAL-13M-28317_area2b-line1	20MAL13m-28317	2B	VSN	VSN0	44.27	24	0.43	0.199	11.38	9.37	7.27	0	1.554	98.49	1.73028	1.00494	0.0325824	0.00658717	0.371974	0.545973	0.334866	0	0.0456882	4.07289	0.594776	1.94096	1.74456	2.17404	937.194	926.953	948.836
109	Line 11 20MAL-13M-28317_area2b-line1	20MAL13m-28317	2B	VSN	VSN0	44.26	23.96	0.436	0.247	12.06	9.14	7.5	0	1.557	99.16	1.72292	0.999226	0.0329041	0.00814311	0.392614	0.530427	0.34407	0	0.0455921	4.0759	0.574652	1.71123	1.54655	1.93435	912.847	902.551	926.572
110	Line 10 20MAL-13M-28317_area2b-line1	20MAL13m-28317	2B	VSN	VSN0	44.19	23.98	0.49	0.235	12.37	9.09	7.51	0	1.531	99.413	1.71923	0.999496	0.0369585	0.00774313	0.402479	0.527229	0.344334	0	0.0448055	4.08228	0.567091	1.76128	1.60047	1.97468	911.136	902.928	922.741
111	Line 9 20MAL-13M-28317_area2b-line1	20MAL13m-28317	2B	VSN	VSN0	44.1	24.01	0.408	0.248	12.35	9.13	7.48	0	1.544	99.289	1.71803	1.00209	0.030815	0.00818245	0.402368	0.53026	0.343419	0	0.0452467	4.08042	0.568565	1.7454	1.58627	1.98633	911.89	900.776	924.56
112	Line 8 20MAL-13M-28317_area2b-line1	20MAL13m-28317	2B	VSN	VSN0	43.81	24.04	0.428	0.209	12.37	8.95	7.55	0	1.535	98.891	1.71456	1.00794	0.0324737	0.00692731	0.404868	0.522189	0.348223	0	0.0451892	4.08237	0.563276	1.8147	1.61591	2.05196	920.515	911.714	931.039
113	Line 7 20MAL-13M-28317_area2b-line1	20MAL13m-28317	2B	VSN	VSN0	43.8	24.03	0.452	0.231	12.29	9.05	7.53	0.02	1.533	98.975	1.71329	1.00701	0.0342771	0.00765258	0.402043	0.527753	0.347122	0.000618489	0.0451071	4.08487	0.567601	1.73035	1.56788	1.92912	964.771	957.761	971.614
114	Line 6 20MAL-13M-28317_area2b-line1	20MAL13m-28317	2B	VSN	VSN0	44.3	24	0.426	0.227	12.22	9.17	7.54	0.027	1.529	99.459	1.72074	0.998721	0.0320796	0.00746751	0.396959	0.531013	0.345154	0.000829124	0.044675	4.07764	0.572229	1.89286	1.68695	2.15736	975.434	968.263	983.727
115	Line 5 20MAL-13M-28317_area2b-line1	20MAL13m-28317	2B	VSN	VSN0	44.46	23.94	0.446	0.281	12.14	9.17	7.47	0	1.514	99.431	1.72611	0.995737	0.0335693	0.00923939	0.394167	0.530753	0.341782	0	0.0442151	4.07557	0.573837	1.69363	1.5342	1.90136	893.415	885.011	905.5
116	Line 4 20MAL-13M-28317_area2b-line1	20MAL13m-28317	2B	VSN	VSN0	44.39	24	0.452	0.246	12.19	9.16	7.44	0	1.497	99.392	1.72508	0.99921	0.0340542	0.0080965	0.396179	0.530694	0.340743	0	0.0437615	4.07782	0.572564	1.77818	1.59833	1.99449	910.55	899.596	921.673
117	Line 3 20MAL-13M-28317_area2b-line1	20MAL13m-28317	2B	VSN	VSN0	44.27	23.96	0.517	0.244	12.15	9.19	7.4	0	1.504	99.263	1.72343	0.999295	0.0390197	0.00804477	0.395571	0.533366	0.339506	0	0.0440432	4.08228	0.574168	1.8433	1.65829	2.0697	907.798	898.75	918.484
118	Line 2 20MAL-13M-28317_area2b-line1	20MAL13m-28317	2B	VSN	VSN0	44.35	24.07	0.46	0.218	12.15	9.02	7.5	0	1.541	99.322	1.72454	1.00271	0.0346773	0.00717918	0.395111	0.522891	0.343693	0	0.0450742	4.07588	0.569597	1.76608	1.58259	2.00526	916.75	908.305	927.538
119	Line 1 20MAL-13M-28317_area2b-line1	20MAL13m-28317	2B	VSN	VSN0	43.47	23.94	0.434	0.218	12.41	8.99	7.83	0	1.656	98.956	1.7013	1.00377	0.0329297	0.00722579	0.406186	0.524535	0.361145	0	0.0487525	4.08584	0.563579	1.65328	1.47499	1.87646	934.758	924.02	944.885
120	Line 18 20MAL-13M-28317_area12A-line1	20MAL13m-28317	12A	VSN	VSN0	44.23	22.93	0.808	0.493	15.13	7.27	7.34	0	1.408	99.639	1.73665	0.964543	0.0615057	0.0163939	0.496819	0.425554	0.339642	0	0.0415857	4.08269	0.461369	1.62214	1.46118	1.97154	806.981	801.191	811.481
121	Line 17 20MAL-13M-28317_area12A-line1	20MAL13m-28317	12A	VSN	VSN0	45.05	22.75	0.923	0.499	15.2	7.5	6.53	0.02	1.247	99.743	1.76521	0.955004	0.0701152	0.0165593	0.498092	0.438115	0.30154	0.000619551	0.0367548	4.08201	0.467968	2.50367	2.06844	3.11558	846.371	837.614	853.717
122	Line 16 20MAL-13M-28317_area12A-line1	20MAL13m-28317	12A	VSN	VSN0	45.08	22.84	0.978	0.547	15.34	7.54	6.67	0	1.304	100.308	1.75793	0.954192	0.0739375	0.0180652	0.500273	0.438343	0.306531	0	0.0382509	4.08752	0.46701	2.17417	1.82	2.73237	794.515	790.978	799.946
123	Line 15 20MAL-13M-28317_area12A-line1	20MAL13m-28317	12A	VSN	VSN0	45.08	22.79	0.889	0.528	15.06	7.6	6.76	0	1.3	100.026	1.75962	0.953017	0.0672736	0.0174545	0.491613	0.442255	0.310965	0	0.0381702	4.08037	0.473574	1.91227	1.63334	2.42978	797.266	793.278	803.461
124	Line 14 20MAL-13M-28317_area12A-line1	20MAL13m-28317	12A	VSN	VSN0	45.08	22.8	0.94	0.515	15.13	7.49	6.75	0	1.31	100.027	1.76029	0.953801	0.0711602	0.0170313	0.494087	0.436021	0.310624	0	0.0384785	4.0815	0.468785	2.17687	1.79959	2.80119	798.621	794.4	804.779
125	Line 13 20MAL-13M-28317_area12A-line1	20MAL13m-28317	12A	VSN	VSN0	45.07	22.81	1.008	0.5	15.15	7.47	6.74	0.02	1.29	100.059	1.75982	0.954177	0.0763046	0.0165345	0.494718	0.434838	0.31015	0.000617386	0.0378894	4.08505	0.467791	2.921	2.34907	3.65614	845.427	838.154	852.683
126	Line 12 20MAL-13M-28317_area12A-line1	20MAL13m-28317	12A	VSN	VSN0	44.71	22.67	0.994	0.483	15.31	7.37	6.9	0	1.324	99.761	1.75265	0.952057	0.0755412	0.0160352	0.501913	0.430707	0.318763	0	0.0390412	4.0867	0.461825	2.69795	2.19696	3.49921	804.902	798.725	809.022
127	Line 11 20MAL-13M-28317_area12A-line1	20MAL13m-28317	12A	VSN	VSN0	44.42	23.39	0.668	0.365	13.8	8.4	7.68	0	1.456	100.197	1.72298	0.971971	0.0502326	0.0119904	0.447656	0.485742	0.351069	0	0.0424824	4.08412	0.520402	1.83029	1.52908	2.19679	841.278	835.217	850.576
128	Line 10 20MAL-13M-28317_area12A-line1	20MAL13m-28317	12A	VSN	VSN0	44.47	23.44	0.581	0.366	13.69	8.42	7.66	0	1.488	100.115	1.72469	0.973919	0.0436845	0.0120216	0.444028	0.486833	0.350108	0	0.0434103	4.07869	0.522992	1.45034	1.28618	1.71364	841.741	836.206	848.965
129	Line 9 20MAL-13M-28317_area12A-line1	20MAL13m-28317	12A	VSN	VSN0	44.25	23.28	0.742	0.364	14.23	8.1	7.72	0	1.504	100.19	1.72007	0.969479	0.0559172	0.0119832	0.462596	0.4694	0.353656	0	0.0439772	4.08708	0.50365	2.03065	1.68311	2.39511	838.492	832.52	846.874
130	Line 7 20MAL-13M-28317_area12A-line1	20MAL13m-28317	12A	VSN	VSN0	42.58	22.9	0.805	0.41	15.67	6.78	8.71	0	1.97	99.843	1.67644	0.965916	0.061445	0.0136711	0.515958	0.397958	0.404139	0	0.0583438	4.09387	0.435442	1.74909	1.53673	2.19164	820.109	815.949	826.983
131	Line 6 20MAL-13M-28317_area12A-line1	20MAL13m-28317	12A	VSN	VSN0	42.75	22.94	0.841	0.433	15.7	6.91	8.57	0.033	1.84	100.041	1.68035	0.966005	0.0640868	0.0144142	0.516092	0.404918	0.396986	0.00102547	0.0544037	4.09828	0.439645	2.12795	1.88941	2.65118	890.404	884.823	897.196
132	Line 4 20MAL-13M-28317_area12A-line1	20MAL13m-28317	12A	VSN	VSN0	43.03	22.89	0.805	0.442	15.33	7.04	8.89	0.024	1.83	100.3	1.68141	0.958228	0.0609825	0.0146272	0.500964	0.410108	0.409386	0.000741408	0.0537896	4.09023	0.450138	1.78078	1.58726	2.17843	863.039	858.056	868.799
133	Line 1 20MAL-13M-28317_area12A-line1	20MAL13m-28317	12A	VSN	VSN0	43.21	23	0.871	0.396	15.43	7.06	8.36	0	1.84	100.169	1.69212	0.964932	0.0661262	0.0131335	0.505331	0.41217	0.385819	0	0.0542014	4.09383	0.449231	2.17625	1.69293	2.80368	826.642	821.878	833.663
134	Line 19 20MAL-13M-28317_area12A-line2	20MAL13m-28317	12A	VSN	VSN0	46.25	22.69	0.987	0.487	15.13	7.69	6.13	0	1.085	100.456	1.79305	0.942406	0.0741835	0.01599	0.490551	0.44446	0.280074	0	0.0316415	4.07236	0.475353	3.1672	2.589	3.9901	807.737	800.961	813.077
135	Line 18 20MAL-13M-28317_area12A-line2	20MAL13m-28317	12A	VSN	VSN0	46.54	22.68	1.132	0.406	14.91	8	5.33	0	1.023	100.022	1.81118	0.945584	0.0854063	0.0133813	0.485262	0.464141	0.244451	0	0.0299472	4.07935	0.488877	4.59595	3.93348	5.37802	829.977	824.326	835.625
136	Line 17 20MAL-13M-28317_area12A-line2	20MAL13m-28317	12A	VSN	VSN0	43.58	22.91	0.93	0.426	15.42	7.11	8.17	0	1.78	100.342	1.70254	0.958864	0.0704371	0.0140948	0.5038	0.414099	0.376151	0	0.052309	4.09229	0.451138	2.33081	1.84197	3.15137	821.517	818.401	826.543
137	Line 16 20MAL-13M-28317_area12A-line2	20MAL13m-28317	12A	VSN	VSN0	43.37	22.97	0.791	0.449	15.04	7.19	8.22	0.025	1.79	99.846	1.70027	0.964745	0.0601194	0.0149078	0.493107	0.420226	0.379779	0.000774844	0.0527872	4.08672	0.460102	1.65413	1.50475	1.92787	866.72	861.268	873.683
138	Line 15 20MAL-13M-28317_area12A-line2	20MAL13m-28317	12A	VSN	VSN0	43.31	23.01	0.832	0.398	15.28	7.21	8.27	0	1.8	100.11	1.69544	0.965014	0.0631432	0.0131952	0.500244	0.42078	0.381532	0	0.0530046	4.09236	0.456861	1.87487	1.5366	2.38029	826.861	822.116	833.446
139	Line 14 20MAL-13M-28317_area12A-line2	20MAL13m-28317	12A	VSN	VSN0	43.2	22.99	0.813	0.444	15.08	7.13	8.22	0	1.77	99.656	1.69824	0.968224	0.0619604	0.0147821	0.49577	0.417859	0.380818	0	0.0523401	4.08999	0.457362	1.52063	1.37511	1.89371	820.409	817.354	824.186
140	Line 13 20MAL-13M-28317_area12A-line2	20MAL13m-28317	12A	VSN	VSN0	42.92	22.95	0.801	0.389	15.53	6.9	8.53	0.04	1.87	99.93	1.68593	0.965791	0.0609986	0.012941	0.510169	0.404066	0.394873	0.00124218	0.0552544	4.09126	0.441972	2.38353	2.11234	2.80012	916.008	908.191	925.659
141	Line 12 20MAL-13M-28317_area12A-line2	20MAL13m-28317	12A	VSN	VSN0	43.22	22.92	0.828	0.449	15.36	7.01	8.35	0	1.87	100.022	1.69437	0.962632	0.0629307	0.0149076	0.503592	0.409701	0.38578	0	0.0551457	4.08906	0.448597	1.57409	1.41278	1.93736	818.999	815.774	822.159
142	Line 11 20MAL-13M-28317_area12A-line2	20MAL13m-28317	12A	VSN	VSN0	43.76	22.91	0.848	0.453	15.36	7.14	8.04	0.041	1.73	100.286	1.70911	0.958605	0.0642091	0.0149841	0.501704	0.415734	0.370066	0.00126596	0.0508259	4.0865	0.453147	2.33237	2.04412	2.79016	918.595	910.915	926.606
143	Line 10 20MAL-13M-28317_area12A-line2	20MAL13m-28317	12A	VSN	VSN0	43.53	22.96	0.835	0.419	15.22	7.09	8.18	0.034	1.77	100.038	1.7039	0.962828	0.0633651	0.0138902	0.498234	0.413739	0.377345	0.00105215	0.0521164	4.08647	0.453674	2.16638	1.90292	2.61964	899.231	893.079	906.241
144	Line 9 20MAL-13M-28317_area12A-line2	20MAL13m-28317	12A	VSN	VSN0	43.21	22.82	0.832	0.438	15.34	7.01	8.17	0	1.76	99.606	1.70101	0.962412	0.0634973	0.0146028	0.505025	0.411402	0.379032	0	0.0521174	4.0891	0.44892	1.6459	1.44709	2.07216	818.866	815.888	822.508
145	Line 8 20MAL-13M-28317_area12A-line2	20MAL13m-28317	12A	VSN	VSN0	43.28	22.85	0.829	0.443	15.42	7	8.32	0.037	1.82	100.01	1.69681	0.959743	0.06301	0.0147092	0.505586	0.409138	0.384415	0.00114682	0.0536741	4.08824	0.44728	2.10454	1.89274	2.498	904.033	897.247	911.661
146	Line 7 20MAL-13M-28317_area12A-line2	20MAL13m-28317	12A	VSN	VSN0	43.18	23.03	0.773	0.465	15.18	7.15	8.37	0	1.77	99.96	1.69345	0.967624	0.0587731	0.0154448	0.497881	0.418044	0.386853	0	0.0522168	4.09029	0.456417	1.45086	1.3483	1.62382	819.788	816.281	822.676
147	Line 6 20MAL-13M-28317_area12A-line2	20MAL13m-28317	12A	VSN	VSN0	43.23	22.91	0.779	0.389	15.32	7.16	8.31	0	1.78	99.896	1.69593	0.962872	0.0592471	0.0129244	0.502625	0.418755	0.384196	0	0.0525276	4.08907	0.454487	1.75927	1.51615	2.19836	830.002	823.827	836.555
148	Line 5 20MAL-13M-28317_area12A-line2	20MAL13m-28317	12A	VSN	VSN0	43.2	22.84	0.83	0.428	15.44	7.08	8.36	0.02	1.81	100.038	1.6938	0.959392	0.0630906	0.0142122	0.506278	0.413844	0.386291	0.000619945	0.053383	4.09091	0.449771	1.73237	1.50488	2.28798	854.305	850.267	859.788
149	Line 4 20MAL-13M-28317_area12A-line2	20MAL13m-28317	12A	VSN	VSN0	43.23	22.77	0.837	0.39	15.77	6.93	8.24	0	1.81	100.001	1.69746	0.957853	0.0637159	0.0129693	0.517856	0.405669	0.381304	0	0.0534612	4.09029	0.439262	2.02105	1.66888	2.59543	826.934	821.139	833.555
150	Line 3 20MAL-13M-28317_area12A-line2	20MAL13m-28317	12A	VSN	VSN0	46.17	22.63	0.973	0.439	15.19	7.69	5.94	0	1.021	100.067	1.79762	0.943942	0.0734447	0.0144758	0.494607	0.446365	0.272556	0	0.0299027	4.07292	0.474366	3.82369	3.14224	4.62338	815.046	810.678	820.657
151	Line 2 20MAL-13M-28317_area12A-line2	20MAL13m-28317	12A	VSN	VSN0	45.93	22.74	0.978	0.461	15.25	7.73	6.13	0.041	1.073	100.333	1.78557	0.947093	0.0737102	0.0151782	0.495808	0.448007	0.280848	0.00126011	0.0313781	4.07885	0.474677	4.08277	3.51247	4.80422	942.703	933.569	951.706
152	Line 1 20MAL-13M-28317_area12A-line2	20MAL13m-28317	12A	VSN	VSN0	45.87	22.68	0.996	0.48	15.32	7.66	6.05	0	1.063	100.153	1.78789	0.947059	0.0752627	0.015845	0.499384	0.445108	0.277906	0	0.0311668	4.07962	0.471267	3.31434	2.74117	4.12279	808.178	801.74	813.784
153	Line 1 20MAL-13M-28317_area12A-line3	20MAL13m-28317	12A	VSN	VSN0	44.35	22.66	0.96	0.377	15.43	7.22	7.4	0	1.48	99.878	1.73692	0.950755	0.0728898	0.0125045	0.505378	0.42155	0.341546	0	0.0436009	4.08515	0.454782	3.26183	2.53333	4.04295	824.418	819.239	829.902
154	Line 3 20MAL-13M-28317_area12A-line3	20MAL13m-28317	12A	VSN	VSN0	45.23	22.67	0.994	0.414	15.28	7.56	6.59	0	1.259	100.014	1.76618	0.948377	0.0752492	0.0136914	0.498993	0.440103	0.303265	0	0.0369811	4.08283	0.468645	3.47456	2.86841	4.29413	814.815	809.842	820.634
155	Line 4 20MAL-13M-28317_area12A-line3	20MAL13m-28317	12A	VSN	VSN0	43.43	23.41	0.62	0.289	13.48	8.02	8.63	0.034	1.72	99.643	1.69319	0.977775	0.0468615	0.00954228	0.43951	0.466138	0.396512	0.00104795	0.0504418	4.08102	0.514701	2.11926	1.89847	2.47493	958.167	947.48	968.076
156	Line 5 20MAL-13M-28317_area12A-line3	20MAL13m-28317	12A	VSN	VSN0	43.59	23.5	0.581	0.263	13.23	8.26	8.68	0	1.71	99.814	1.6935	0.978113	0.0437606	0.00865354	0.429856	0.478414	0.397419	0	0.0499737	4.07969	0.526731	1.83604	1.66777	2.08714	907.486	896.752	919.384
157	Line 6 20MAL-13M-28317_area12A-line3	20MAL13m-28317	12A	VSN	VSN0	43.55	23.6	0.597	0.295	13.15	8.32	8.7	0.041	1.7	99.953	1.69018	0.981251	0.0449189	0.00969632	0.426811	0.481387	0.39792	0.00125798	0.0496297	4.08306	0.530046	2.1919	1.98678	2.49225	967.69	958.533	977.713
158	Line 7 20MAL-13M-28317_area12A-line3	20MAL13m-28317	12A	VSN	VSN0	43.44	23.69	0.598	0.26	13.11	8.32	8.8	0	1.71	99.947	1.68638	0.985264	0.0450065	0.00854826	0.42563	0.481519	0.402604	0	0.0499353	4.08489	0.530805	1.8962	1.70912	2.20854	915.676	903.007	926.841
159	Line 8 20MAL-13M-28317_area12A-line3	20MAL13m-28317	12A	VSN	VSN0	43.14	23.57	0.62	0.275	13.12	8.32	8.92	0	1.73	99.695	1.67956	0.983097	0.0467967	0.00906747	0.427181	0.482906	0.40927	0	0.0506649	4.08854	0.530615	1.89927	1.7009	2.28275	903.688	894.159	917.195
160	Line 9 20MAL-13M-28317_area12A-line3	20MAL13m-28317	12A	VSN	VSN0	42.76	23.5	0.576	0.279	13.72	7.8	9.16	0	1.88	99.675	1.67016	0.983353	0.0436165	0.00922917	0.448165	0.454192	0.421643	0	0.0552362	4.08559	0.50334	1.68618	1.56641	1.85901	892.331	883.963	904.966
161	Line 10 20MAL-13M-28317_area12A-line3	20MAL13m-28317	12A	VSN	VSN0	42.56	23.45	0.608	0.31	14.12	7.67	9.27	0	1.88	99.875	1.66301	0.981652	0.0460579	0.0102587	0.461414	0.4468	0.426877	0	0.0552582	4.09132	0.491954	1.62025	1.48967	1.88291	873.725	864.494	882.16
162	Line 11 20MAL-13M-28317_area12A-line3	20MAL13m-28317	12A	VSN	VSN0	43.41	23.1	0.724	0.379	14.96	7.17	8.39	0	1.73	99.88	1.69986	0.969072	0.0549628	0.012569	0.489911	0.418568	0.387181	0	0.0509582	4.08308	0.460735	1.71458	1.47768	2.10497	833.377	826.867	841.187
163	Line 13 20MAL-13M-28317_area17-line1	20MAL13m-28317	17	VSN	VSN0	43.15	23.14	0.736	0.419	14.95	7.25	7.73	0	1.509	98.889	1.70998	0.982419	0.0565454	0.0140626	0.495469	0.428326	0.361011	0	0.0449828	4.0928	0.463659	1.61269	1.43065	1.8865	819.973	816.277	825.535
164	Line 12 20MAL-13M-28317_area17-line1	20MAL13m-28317	17	VSN	VSN0	44.25	22.95	0.833	0.424	15.09	7.53	7.04	0	1.33	99.464	1.74047	0.96707	0.0635194	0.014124	0.49637	0.441543	0.326329	0	0.0393506	4.08878	0.470772	2.10327	1.75518	2.59256	810.832	807.214	815.819
165	Line 11 20MAL-13M-28317_area17-line1	20MAL13m-28317	17	VSN	VSN0	45.49	23.07	0.918	0.395	14.81	7.98	6.18	0	1.126	100.001	1.7744	0.964062	0.0694203	0.0130488	0.483119	0.464049	0.284089	0	0.0330385	4.08523	0.489933	3.21418	2.69266	3.83515	823.949	818.294	829.459
166	Line 10 20MAL-13M-28317_area17-line1	20MAL13m-28317	17	VSN	VSN0	47.08	22.84	1.022	0.448	14.53	8.37	4.98	0	0.769	100.052	1.8273	0.949708	0.0769009	0.0147261	0.47163	0.484309	0.227788	0	0.0224515	4.07481	0.506632	4.7754	4.22622	5.40409	833.125	828.413	838.821
167	Line 9 20MAL-13M-28317_area17-line1	20MAL13m-28317	17	VSN	VSN0	47.17	22.88	0.998	0.462	14.52	8.36	4.94	0.025	0.794	100.15	1.8286	0.950236	0.0750054	0.0151682	0.470743	0.483153	0.225689	0.000766194	0.0231537	4.07252	0.506505	4.87104	4.28867	5.46945	899.057	890.762	908.331
168	Line 8 20MAL-13M-28317_area17-line1	20MAL13m-28317	17	VSN	VSN0	47.05	22.82	1.042	0.473	14.69	8.25	5.09	0	0.812	100.254	1.82409	0.947815	0.0783181	0.0155305	0.47629	0.476831	0.232559	0	0.0236804	4.07511	0.500284	4.55721	3.96517	5.17362	826.784	821.964	832.31
169	Line 7 20MAL-13M-28317_area17-line1	20MAL13m-28317	17	VSN	VSN0	46.78	22.73	0.997	0.473	14.57	8.28	5.13	0	0.852	99.853	1.82073	0.947781	0.0752298	0.0155914	0.474252	0.480443	0.235306	0	0.0249444	4.07428	0.503242	4.11789	3.51219	4.78879	827.744	822.497	833.839
170	Line 6 20MAL-13M-28317_area17-line1	20MAL13m-28317	17	VSN	VSN0	46.79	22.79	1.06	0.446	14.63	8.26	5.21	0	0.858	100.047	1.81767	0.948478	0.0798317	0.0146735	0.475301	0.478372	0.238522	0	0.0250723	4.07792	0.50161	4.77594	4.16136	5.48681	829.148	824.801	835.547
171	Line 5 20MAL-13M-28317_area17-line1	20MAL13m-28317	17	VSN	VSN0	46.8	22.86	1.001	0.43	14.59	8.29	5.21	0	0.85	100.044	1.81778	0.951247	0.0753767	0.014145	0.47393	0.480037	0.238486	0	0.0248348	4.07583	0.503201	4.53362	3.93829	5.14262	831.98	826.927	838.182
172	Line 4 20MAL-13M-28317_area17-line1	20MAL13m-28317	17	VSN	VSN0	47.12	22.88	0.943	0.457	14.74	8.29	5.26	0.026	0.824	100.54	1.82038	0.946968	0.0706281	0.0149525	0.476232	0.47746	0.239482	0.000794101	0.0239459	4.07085	0.500644	4.61007	4.05391	5.26539	901.284	891.371	913.07
173	Line 3 20MAL-13M-28317_area17-line1	20MAL13m-28317	17	VSN	VSN0	46.82	22.77	1.024	0.504	14.68	8.28	5.26	0.03	0.871	100.239	1.81568	0.946004	0.0769868	0.016553	0.4761	0.4787	0.240394	0.00091976	0.0254081	4.07675	0.501362	4.6599	3.96904	5.38736	914.003	902.348	924.288
174	Line 2 20MAL-13M-28317_area17-line1	20MAL13m-28317	17	VSN	VSN0	46.99	22.64	1.031	0.458	14.69	8.24	5.57	0	0.879	100.519	1.81475	0.936718	0.0771929	0.0149801	0.474456	0.47442	0.25351	0	0.0255356	4.07156	0.499981	4.83415	4.13219	5.66324	826.252	821.239	832.784
175	Line 1 20MAL-13M-28317_area17-line1	20MAL13m-28317	17	VSN	VSN0	46.93	22.74	1.036	0.465	14.72	8.14	5.61	0	0.909	100.554	1.81255	0.940917	0.0775724	0.0152101	0.475456	0.468693	0.255348	0	0.0264088	4.07215	0.496418	4.63106	3.95962	5.50127	823.847	818.478	828.769
176	Line 1 20MAL13m-28317_area12b-line2	20MAL13m-28317	12B	VSN	VSN0	53.72	23.6	0.933	0.357	7.96	13.18	0.848	0	0.109	100.711	1.99087	0.937003	0.0670343	0.0112051	0.246708	0.728194	0.0370368	0	0.00303864	4.02109	0.746941	1.75967	1.64114	1.86641	927.977	911.992	946.212
177	Line 2 20MAL13m-28317_area12b-line2	20MAL13m-28317	12B	VSN	VSN0	53.37	23.49	0.957	0.294	8.21	13.02	1.29	0	0.142	100.776	1.97847	0.932903	0.0687783	0.00923033	0.25453	0.71956	0.0563574	0	0.00395973	4.02378	0.7387	2.12976	1.97211	2.28587	970.56	951.884	992.396
178	Line 3 20MAL13m-28317_area12b-line2	20MAL13m-28317	12B	VSN	VSN0	49.3	23.4	0.803	0.267	11	10.57	4.21	0.043	0.922	100.515	1.86611	0.948919	0.0589271	0.00855936	0.348215	0.596474	0.187803	0.00128678	0.0262524	4.04255	0.631397	4.37411	4.00885	4.86468	986.619	972.671	1001.69
179	Line 4 20MAL13m-28317_area12b-line2	20MAL13m-28317	12B	VSN	VSN0	50.23	23.79	0.616	0.267	10.28	11.25	3.4	0	0.626	100.46	1.89439	0.961217	0.0450396	0.00852816	0.324237	0.632532	0.151117	0	0.0177593	4.03482	0.661113	2.85268	2.50533	3.22303	924.428	900.277	946.835
180	Line 5 20MAL13m-28317_area12b-line2	20MAL13m-28317	12B	VSN	VSN0	49.83	23.67	0.697	0.29	10.43	11.01	3.47	0.03	0.594	100.022	1.89061	0.962125	0.0512687	0.00931854	0.330947	0.622764	0.155157	0.000899865	0.0169529	4.04004	0.65299	4.30783	3.94559	4.70464	928.978	911.415	952.647
181	Line 6 20MAL13m-28317_area12b-line2	20MAL13m-28317	12B	VSN	VSN0	49.15	23.56	0.749	0.287	10.97	10.56	4.07	0	0.74	100.094	1.86959	0.960109	0.0552349	0.00924579	0.348975	0.598842	0.182452	0	0.0211739	4.04562	0.631812	4.02198	3.56591	4.44567	905.659	895.141	921.405
182	Line 8 20MAL13m-28317_area12b-line2	20MAL13m-28317	12B	VSN	VSN0	52.81	23.1	1.179	0.335	9.44	12.23	0.778	0	0.129	100.009	1.98669	0.930998	0.0859879	0.0106733	0.296996	0.685909	0.0344925	0	0.00365049	4.0354	0.697838	2.25295	1.98784	2.38949	916.852	895.737	939.14
183	Line 9 20MAL13m-28317_area12b-line2	20MAL13m-28317	12B	VSN	VSN0	53.02	23.1	1.088	0.34	9.04	12.3	0.804	0	0.072	99.768	1.99377	0.930613	0.0793181	0.0108281	0.284294	0.689549	0.0356304	0	0.00203664	4.02604	0.70807	2.05006	1.70797	2.27241	923.174	901.788	946.497
184	Line 10 20MAL13m-28317_area12b-line2	20MAL13m-28317	12B	VSN	VSN0	53.48	23.1	1.184	0.37	9.67	12.04	0.805	0	0.134	100.79	1.99515	0.923248	0.0856337	0.0116903	0.3017	0.669632	0.0353924	0	0.00376041	4.02621	0.689396	2.20489	1.97426	2.33503	888.378	875.323	906.509
185	Line 11 20MAL13m-28317_area12b-line2	20MAL13m-28317	12B	VSN	VSN0	54.05	23.06	1.146	0.359	9.69	12.32	0.723	0	0.143	101.508	1.99959	0.913957	0.0821935	0.0112481	0.2998	0.679485	0.0315219	0	0.00397948	4.02177	0.693858	2.13423	1.80478	2.28654	903.659	887.74	925.994
186	Line 13 20MAL13m-28317_area12b-line2	20MAL13m-28317	12B	VSN	VSN0	53.55	23.29	1.111	0.312	9.17	12.27	0.88	0	0.079	100.671	1.9953	0.929696	0.080255	0.00984562	0.285748	0.681583	0.0386422	0	0.00221423	4.02329	0.704602	2.15295	1.80528	2.39735	942.765	922.385	966.006
187	Line 14 20MAL13m-28317_area12b-line2	20MAL13m-28317	12B	VSN	VSN0	50.75	23.24	0.928	0.342	10.44	10.92	2.92	0	0.584	100.131	1.91946	0.941677	0.0680456	0.0109549	0.330224	0.615732	0.130154	0	0.0166151	4.03287	0.65091	2.58022	2.18538	2.96685	868.514	853.49	887.388
188	Line 15 20MAL13m-28317_area12b-line2	20MAL13m-28317	12B	VSN	VSN0	48.95	23.45	0.786	0.304	10.83	10.45	4.19	0	0.877	99.841	1.86589	0.957633	0.0580851	0.00981401	0.345244	0.593848	0.188225	0	0.0251466	4.04389	0.632364	3.66968	3.19684	4.05706	902.271	891.728	915.885
189	Line 1 20MAL13m-28317_area2a-line1	20MAL13m-28317	2A	VSN	VSN0	44.87	22.86	0.771	0.637	13.17	8.25	6.85	0	1.431	98.84	1.75854	0.959831	0.0585814	0.0211434	0.431664	0.482032	0.316386	0	0.0421874	4.07037	0.527562	1.39823	1.29652	1.5812	791.288	788.339	794.946
190	Line 2 20MAL13m-28317_area2a-line1	20MAL13m-28317	2A	VSN	VSN0	45.3	22.4	0.746	0.823	13.54	8.3	6.15	0	1.12	98.396	1.78497	0.945587	0.0569874	0.0274644	0.446184	0.487567	0.285586	0	0.0331968	4.06754	0.52216	1.73976	1.47991	2.11677	785.369	783.051	788.386
191	Line 3 20MAL13m-28317_area2a-line1	20MAL13m-28317	2A	VSN	VSN0	44.81	23.13	0.729	0.655	13.5	8.21	6.81	0	1.41	99.277	1.75324	0.969535	0.055297	0.0217043	0.441737	0.478888	0.31401	0	0.0414984	4.07591	0.520177	1.42209	1.31255	1.56945	790.827	788.077	794.263
192	Line 4 20MAL13m-28317_area2a-line1	20MAL13m-28317	2A	VSN	VSN0	46.74	23.28	0.72	0.601	12.61	9.51	6.49	0.021	1.25	101.235	1.77799	0.948734	0.0530983	0.0193621	0.401161	0.539318	0.290947	0.000631544	0.0357681	4.06701	0.573451	2.33331	1.97819	2.77933	801.887	788.594	815.817
193	Line 6 20MAL13m-28317_area2a-line1	20MAL13m-28317	2A	VSN	VSN0	45.07	23.31	0.664	0.56	12.6	8.9	6.67	0	1.456	99.24	1.75577	0.972848	0.0501484	0.018476	0.410502	0.516887	0.306222	0	0.0426666	4.07352	0.557357	1.54897	1.42875	1.72842	793.259	786.459	800.201
194	Line 7 20MAL13m-28317_area2a-line1	20MAL13m-28317	2A	VSN	VSN0	44.88	23.25	0.749	0.598	12.67	8.92	6.67	0	1.46	99.227	1.75105	0.971829	0.0566546	0.0197599	0.413414	0.518841	0.306691	0	0.0428493	4.08109	0.556544	1.54489	1.43182	1.72723	789.191	782.938	794.267
195	Line 8 20MAL13m-28317_area2a-line1	20MAL13m-28317	2A	VSN	VSN0	45.09	23.34	0.629	0.622	12.69	8.92	6.67	0.021	1.413	99.395	1.75477	0.973114	0.047457	0.0205008	0.413015	0.517524	0.305912	0.000646108	0.0413647	4.07431	0.556155	1.63636	1.50228	1.79111	826.104	813.921	836.684
196	Line 9 20MAL13m-28317_area2a-line1	20MAL13m-28317	2A	VSN	VSN0	45.5	23.33	0.71	0.617	12.3	9.23	6.36	0	1.359	99.426	1.76654	0.970397	0.0534416	0.0202879	0.399376	0.534244	0.291005	0	0.0396898	4.07498	0.572229	1.74445	1.56922	2.05113	784.794	778.568	791.683
197	Line 10 20MAL13m-28317_area2a-line1	20MAL13m-28317	2A	VSN	VSN0	45.36	23.32	0.675	0.598	12.49	8.89	6.44	0	1.341	99.133	1.76768	0.9736	0.0509967	0.0197365	0.407058	0.516484	0.295765	0	0.0393102	4.07063	0.559243	1.61909	1.48909	1.81237	789.384	784.032	795.675
198	Line 11 20MAL13m-28317_area2a-line1	20MAL13m-28317	2A	VSN	VSN0	45.7	23.37	0.691	0.62	12.36	9.19	6.39	0	1.311	99.642	1.76975	0.969562	0.0518778	0.0203341	0.400292	0.530561	0.291626	0	0.0381895	4.07219	0.569973	1.74009	1.57402	2.01635	783.327	777.212	789.366
199	Line 12 20MAL13m-28317_area2a-line1	20MAL13m-28317	2A	VSN	VSN0	45.42	23.35	0.675	0.613	12.59	9.03	6.31	0.025	1.301	99.314	1.76776	0.973608	0.0509316	0.0202057	0.409793	0.523948	0.289424	0.000769237	0.0380889	4.07452	0.561128	1.87062	1.71864	2.07792	838.224	827.191	847.65
200	Line 13 20MAL13m-28317_area2a-line1	20MAL13m-28317	2A	VSN	VSN0	45.44	23.4	0.662	0.603	12.37	9.18	6.39	0	1.31	99.361	1.76581	0.974192	0.0498739	0.0198455	0.402013	0.531832	0.292643	0	0.0382934	4.07451	0.569508	1.70063	1.53893	1.95589	784.666	778.861	791.827
201	Line 15 20MAL13m-28317_area2a-line1	20MAL13m-28317	2A	VSN	VSN0	45.38	23.25	0.736	0.566	12.47	8.9	6.48	0	1.348	99.161	1.76758	0.970196	0.0555777	0.0186711	0.406204	0.516808	0.297454	0	0.0394958	4.07199	0.559915	1.65638	1.52736	1.86344	791.412	785.733	797.774
202	Line 16 20MAL13m-28317_area2a-line1	20MAL13m-28317	2A	VSN	VSN0	45.81	23.2	0.748	0.578	12.39	9.39	6.68	0	1.313	100.132	1.7638	0.956972	0.0558341	0.0188476	0.398955	0.538989	0.303107	0	0.0380277	4.07453	0.574649	2.09075	1.79688	2.49959	775.893	767.805	783.881
203	Line 17 20MAL13m-28317_area2a-line1	20MAL13m-28317	2A	VSN	VSN0	45.04	23.32	0.688	0.594	12.71	8.87	6.59	0	1.435	99.246	1.75601	0.974043	0.0520025	0.0196134	0.414416	0.515556	0.302791	0	0.0420849	4.07651	0.554378	1.57217	1.44448	1.7398	791.136	784.632	796.629
204	Line 18 20MAL13m-28317_area2a-line1	20MAL13m-28317	2A	VSN	VSN0	45.24	23.29	0.664	0.615	12.85	8.9	6.51	0.023	1.373	99.466	1.76018	0.970792	0.0500854	0.0202651	0.41812	0.516238	0.298501	0.000707469	0.0401838	4.07507	0.552505	1.73147	1.58214	1.91158	833.403	823.701	843.431
205	Line 19 20MAL13m-28317_area2a-line1	20MAL13m-28317	2A	VSN	VSN0	44.96	23.32	0.671	0.606	13.05	8.84	6.47	0	1.292	99.218	1.75693	0.976289	0.0508345	0.0200558	0.426483	0.514997	0.297963	0	0.0379784	4.08153	0.547008	1.63766	1.50744	1.84346	788.068	783.789	793.461
206	Line 20 20MAL13m-28317_area2a-line1	20MAL13m-28317	2A	VSN	VSN0	44.45	23.36	0.742	0.599	13.5	8.43	6.92	0	1.457	99.49	1.73819	0.978635	0.056252	0.0198377	0.441493	0.491449	0.318906	0	0.042858	4.08762	0.526774	1.39326	1.30246	1.52996	793.883	790.07	797.914
207	Line 21 20MAL13m-28317_area2a-line1	20MAL13m-28317	2A	VSN	VSN0	44.29	23.28	0.758	0.637	13.79	8.25	6.89	0.03	1.462	99.402	1.73639	0.977793	0.0576129	0.0211505	0.452137	0.482193	0.31834	0.00092984	0.0431157	4.08966	0.516084	1.801	1.64952	1.97212	872.717	863.782	883.117
208	Line 23 20MAL13m-28317_area2a-line1	20MAL13m-28317	2A	VSN	VSN0	45.14	23.12	0.789	0.697	13.93	8.22	6.15	0.024	0.964	99.044	1.77415	0.973507	0.0601194	0.0232007	0.457872	0.481644	0.284862	0.000745737	0.0285005	4.0846	0.512651	2.27731	2.08516	2.56281	844.469	836.798	852.391
209	Line 25 20MAL13m-28317_area2a-line1	20MAL13m-28317	2A	VSN	VSN0	44.86	23.19	0.749	0.598	13.13	8.86	6.94	0	1.493	99.83	1.74213	0.964817	0.0563913	0.0196681	0.426433	0.512957	0.317623	0	0.0436142	4.08364	0.546053	1.5049	1.38416	1.67502	790.518	784.655	794.963
210	Line 26 20MAL13m-28317_area2a-line1	20MAL13m-28317	2A	VSN	VSN0	45.14	23.24	0.67	0.597	13.03	8.97	6.73	0	1.452	99.836	1.75093	0.965749	0.0503836	0.0196119	0.422683	0.518709	0.307646	0	0.0423662	4.07808	0.551002	1.58402	1.44986	1.76418	789.922	782.477	795.511
211	Line 27 20MAL13m-28317_area2a-line1	20MAL13m-28317	2A	VSN	VSN0	45.34	23.26	0.74	0.607	12.75	9.05	6.57	0	1.408	99.75	1.7583	0.966369	0.0556354	0.019936	0.413509	0.523221	0.300267	0	0.0410734	4.07831	0.558561	1.6308	1.5018	1.85704	786.571	780.301	792.65
212	Line 28 20MAL13m-28317_area2a-line1	20MAL13m-28317	2A	VSN	VSN0	49.33	22.18	1.164	1.05	14.53	8.46	2.83	0	0.306	99.86	1.91367	0.921804	0.087542	0.0344971	0.471394	0.489272	0.129381	0	0.00892941	4.05649	0.509305	2.11597	1.89801	2.2404	780.347	774.66	784.426
213	Line 29 20MAL13m-28317_area2a-line1	20MAL13m-28317	2A	VSN	VSN0	46.38	23.38	0.606	0.615	12.4	9.49	5.87	0	1.117	99.862	1.78968	0.966523	0.0453343	0.0200983	0.400158	0.54593	0.26694	0	0.0324224	4.06709	0.57704	1.74353	1.53207	2.01355	806.074	799.064	815.967
214	Line 30 20MAL13m-28317_area2a-line1	20MAL13m-28317	2A	VSN	VSN0	47.4	23.32	0.658	0.618	12.54	9.87	6	0	1.194	101.6	1.79377	0.945449	0.048275	0.0198068	0.396871	0.556839	0.26759	0	0.033989	4.06259	0.583867	2.27549	1.92964	2.68959	798.849	789.733	808.384
215	Line 31 20MAL13m-28317_area2a-line1	20MAL13m-28317	2A	VSN	VSN0	45.81	23.46	0.587	0.62	12.52	9.45	5.89	0	1.172	99.528	1.77809	0.975537	0.0441713	0.0203809	0.406408	0.546828	0.269426	0	0.034219	4.07506	0.573655	1.59457	1.43664	1.81677	803.299	796.239	812.525
216	Line 32 20MAL13m-28317_area2a-line1	20MAL13m-28317	2A	VSN	VSN0	45.34	23.36	0.679	0.587	12.64	9.02	6.35	0.022	1.245	99.251	1.76645	0.975022	0.0512859	0.0193685	0.411842	0.523903	0.291557	0.000677621	0.0364867	4.07659	0.559878	1.79585	1.66363	2.02614	830.216	820.549	839.57
217	Line 1 20MAL13m-28317_area2a-line2	20MAL13m-28317	2A	VSN	VSN0	45.53	23.47	0.633	0.572	12.49	9.24	5.74	0.028	1.137	98.856	1.78068	0.983384	0.0479955	0.0189462	0.408521	0.538747	0.264564	0.000865747	0.0334499	4.07715	0.568738	2.12804	1.92683	2.34964	870.278	860.902	880.051
218	Line 2 20MAL13m-28317_area2a-line2	20MAL13m-28317	2A	VSN	VSN0	45.95	23.4	0.712	0.578	12.54	9.32	5.73	0	1.146	99.381	1.78581	0.974288	0.0536461	0.0190246	0.407578	0.539996	0.262443	0	0.0335028	4.07629	0.569872	2.07187	1.78857	2.42455	811.97	804.785	820.301
219	Line 3 20MAL13m-28317_area2a-line2	20MAL13m-28317	2A	VSN	VSN0	45.14	23.11	0.72	0.654	13.41	8.57	6.38	0	1.207	99.202	1.76586	0.968539	0.0546055	0.0216677	0.43872	0.499806	0.294135	0	0.035518	4.07885	0.532543	1.64518	1.46128	1.91614	788.213	785.987	791.744
220	Line 4 20MAL13m-28317_area2a-line2	20MAL13m-28317	2A	VSN	VSN0	45.67	23.18	0.719	0.663	13.58	8.5	6.08	0	1.147	99.541	1.78011	0.967946	0.0543317	0.0218861	0.442669	0.493923	0.279286	0	0.0336299	4.07378	0.527362	1.69137	1.49402	1.95525	791.068	787.98	796.021
221	Line 5 20MAL13m-28317_area2a-line2	20MAL13m-28317	2A	VSN	VSN0	45.81	23.27	0.704	0.613	12.7	9.19	6.12	0.02	1.212	99.639	1.77628	0.966653	0.0529216	0.0201304	0.411831	0.531242	0.279662	0.000613094	0.0353509	4.07469	0.563309	1.90618	1.7192	2.23052	829.798	817.892	839.125
222	Line 6 20MAL13m-28317_area2a-line2	20MAL13m-28317	2A	VSN	VSN0	46.26	23.47	0.65	0.605	12.57	9.65	5.71	0	1.127	100.05	1.78501	0.970222	0.0486248	0.0197711	0.405634	0.555122	0.259658	0	0.0327119	4.07676	0.577797	1.92921	1.68732	2.295	809.679	803.271	818.733
223	Line 7 20MAL13m-28317_area2a-line2	20MAL13m-28317	2A	VSN	VSN0	46.41	23.38	0.645	0.542	12	9.83	5.43	0.023	1.037	99.342	1.79851	0.970659	0.0484583	0.0177885	0.388906	0.567909	0.247988	0.000704649	0.0302291	4.07115	0.593541	2.29101	1.96868	2.6797	857.948	847.613	869.548
224	Line 8 20MAL13m-28317_area2a-line2	20MAL13m-28317	2A	VSN	VSN0	46.41	23.31	0.68	0.582	12.1	9.83	5.41	0.021	1.014	99.357	1.79846	0.967727	0.0510865	0.0191008	0.392137	0.567894	0.247068	0.000643358	0.0295579	4.07367	0.591537	2.45914	2.131	2.88104	848	839.048	857.768
225	Line 10 20MAL13m-28317_area2a-line2	20MAL13m-28317	2A	VSN	VSN0	46.64	23.4	0.685	0.599	11.9	9.88	5.29	0.032	1.016	99.442	1.80403	0.969667	0.0513669	0.0196223	0.384942	0.569727	0.241141	0.000978543	0.0295614	4.07103	0.596779	2.74853	2.41898	3.15039	892.661	880.766	904.495
226	Line 11 20MAL13m-28317_area2a-line2	20MAL13m-28317	2A	VSN	VSN0	46.4	23.38	0.656	0.6	11.87	9.83	5.24	0	0.995	98.971	1.80389	0.973774	0.0494429	0.0197552	0.385928	0.569731	0.240078	0	0.0290979	4.0717	0.596166	2.01743	1.71718	2.39507	826.961	818.17	836.345
227	Line 12 20MAL13m-28317_area2a-line2	20MAL13m-28317	2A	VSN	VSN0	45.56	23.36	0.616	0.597	12.06	9.6	5.32	0	1.04	98.156	1.79117	0.983891	0.0469506	0.0198777	0.396518	0.562663	0.246487	0	0.0307561	4.07831	0.586608	1.6812	1.43054	1.95831	821.253	813.538	830.485
228	Line 13 20MAL13m-28317_area2a-line2	20MAL13m-28317	2A	VSN	VSN0	45.93	23.39	0.646	0.614	12.39	9.48	5.76	0	1.089	99.306	1.78508	0.973896	0.0486745	0.0202101	0.402713	0.54928	0.263823	0	0.0318372	4.07551	0.576979	1.8769	1.63874	2.21226	808.971	802.238	816.639
229	Line 14 20MAL13m-28317_area2a-line2	20MAL13m-28317	2A	VSN	VSN0	45.23	23.31	0.697	0.601	12.55	9.25	6.26	0	1.25	99.167	1.76393	0.97391	0.0526982	0.0198503	0.409319	0.537801	0.287713	0	0.03667	4.08189	0.567827	1.78968	1.6119	2.08705	786.859	780.916	794.062
230	Line 15 20MAL13m-28317_area2a-line2	20MAL13m-28317	2A	VSN	VSN0	45.39	23.44	0.65	0.62	12.32	9.41	5.83	0	1.13	98.811	1.77553	0.982309	0.0492936	0.0205399	0.403035	0.548761	0.268762	0	0.0332501	4.08148	0.576553	1.83514	1.62347	2.14895	804.201	797.623	811.49
231	Line 16 20MAL13m-28317_area2a-line2	20MAL13m-28317	2A	VSN	VSN0	45.63	23.4	0.66	0.599	12.25	9.64	5.68	0.028	1.076	98.963	1.78028	0.978081	0.0499217	0.0197926	0.399702	0.560711	0.261165	0.000863654	0.0315788	4.08209	0.583822	2.41101	2.19315	2.80907	862.643	853.851	873.231
232	Line 17 20MAL13m-28317_area2a-line2	20MAL13m-28317	2A	VSN	VSN0	45.55	23.33	0.626	0.626	12.36	9.56	5.75	0	1.093	98.916	1.77896	0.976147	0.0473981	0.0207058	0.403702	0.556623	0.264653	0	0.0321103	4.0803	0.57962	1.79655	1.59556	2.08438	807.429	802.072	815.84
233	Line 18 20MAL13m-28317_area2a-line2	20MAL13m-28317	2A	VSN	VSN0	45.62	23.35	0.639	0.628	12.3	9.49	5.83	0	1.14	98.997	1.77899	0.975502	0.048309	0.0207404	0.401133	0.551709	0.267928	0	0.0334403	4.07776	0.579015	1.81254	1.61123	2.12521	803.094	796.43	811.35
234	Line 19 20MAL13m-28317_area2a-line2	20MAL13m-28317	2A	VSN	VSN0	45.79	23.4	0.626	0.643	12.31	9.54	5.8	0	1.108	99.224	1.78128	0.975211	0.047211	0.0211841	0.400482	0.553266	0.2659	0	0.0324225	4.07696	0.580097	1.79859	1.59756	2.07775	804.672	798.581	812.357
235	Line 20 20MAL13m-28317_area2a-line2	20MAL13m-28317	2A	VSN	VSN0	45.02	23.24	0.669	0.615	12.61	9.27	6.25	0	1.235	98.911	1.76113	0.973965	0.0507364	0.0203751	0.412538	0.540617	0.288134	0	0.0363411	4.08383	0.567187	1.74338	1.56632	2.05145	786.048	780.592	792.015
236	Line 21 20MAL13m-28317_area2a-line2	20MAL13m-28317	2A	VSN	VSN0	45.44	23.33	0.63	0.618	12.47	9.28	6.13	0	1.216	99.124	1.77111	0.974191	0.0476054	0.0204002	0.406478	0.539238	0.281577	0	0.0356523	4.07625	0.57019	1.65926	1.51272	1.89282	790.658	784.616	798.707
237	Line 22 20MAL13m-28317_area2a-line2	20MAL13m-28317	2A	VSN	VSN0	46.71	23.12	0.767	0.695	12.84	9.44	4.84	0	0.842	99.254	1.81804	0.964057	0.0578757	0.0229095	0.417947	0.547759	0.222008	0	0.0246519	4.07525	0.567211	2.31448	2.02609	2.64802	810.292	802.747	817.101
238	Line 23 20MAL13m-28317_area2a-line2	20MAL13m-28317	2A	VSN	VSN0	45.46	23.45	0.732	0.639	12.53	9.41	5.84	0	1.195	99.262	1.77206	0.979297	0.0553183	0.0210955	0.408474	0.546845	0.268283	0	0.03504	4.08642	0.572421	1.99066	1.73786	2.32978	799.488	793.762	806.496
239	Line 24 20MAL13m-28317_area2a-line2	20MAL13m-28317	2A	VSN	VSN0	43.95	22.99	0.653	0.648	13.72	8.29	6.93	0	1.425	98.607	1.73557	0.97262	0.0499924	0.0216719	0.453106	0.488047	0.322512	0	0.0423295	4.08584	0.518563	1.41571	1.30031	1.56492	793.45	790.048	797.785
240	Line 25 20MAL13m-28317_area2a-line2	20MAL13m-28317	2A	VSN	VSN0	45.69	22.85	0.804	0.732	13.71	8.53	6.11	0	1.147	99.585	1.7805	0.953957	0.0607414	0.0241585	0.446809	0.495558	0.280603	0	0.0336225	4.07595	0.525865	1.6662	1.41328	2.01001	789.148	786.54	792.21
241	Line 27 20MAL13m-28317_area2a-line2	20MAL13m-28317	2A	VSN	VSN0	45.15	23	0.736	0.712	13.79	8.53	6.08	0	1.147	99.156	1.77082	0.966422	0.0559633	0.0236503	0.452319	0.498759	0.281029	0	0.0338397	4.08281	0.524414	1.64532	1.4603	1.9047	789.253	786.506	792.908
242	Line 23 20MAL13m-28317_area16-line2	20MAL13m-28317	16	VSN	VSN0	47.28	22.56	0.919	0.747	13.1	8.75	5.12	0.029	1.07	99.575	1.83081	0.935894	0.0689905	0.0244977	0.424229	0.505125	0.23365	0.000887787	0.031167	4.05525	0.543522	2.30227	1.98268	2.66639	873.944	863.493	884.702
243	Line 22 20MAL13m-28317_area16-line2	20MAL13m-28317	16	VSN	VSN0	45.95	22.77	0.778	0.648	13.5	8.35	6.33	0	1.302	99.633	1.78465	0.947441	0.0585808	0.0213148	0.438495	0.48348	0.289735	0	0.0380386	4.06174	0.524396	1.54246	1.36576	1.86173	790.19	787.549	794.535
244	Line 21 20MAL13m-28317_area16-line2	20MAL13m-28317	16	VSN	VSN0	45.7	22.68	0.85	0.669	13.5	8.4	6.24	0	1.371	99.439	1.78058	0.946697	0.0642056	0.0220755	0.439889	0.487922	0.286524	0	0.0401818	4.06808	0.525885	1.45648	1.2887	1.76476	791.73	788.99	795.816
245	Line 20 20MAL13m-28317_area16-line2	20MAL13m-28317	16	VSN	VSN0	44.94	23.56	0.582	0.599	11.5	9.09	7.61	0	1.74	99.621	1.73479	0.974339	0.0435556	0.019583	0.371257	0.52312	0.3462	0	0.0505252	4.06337	0.584899	1.40903	1.28626	1.59125	818.856	810.05	827.106
246	Line 19 20MAL13m-28317_area16-line2	20MAL13m-28317	16	VSN	VSN0	44.68	23.21	0.595	0.67	12.41	8.62	7.29	0.021	1.576	99.072	1.74212	0.969529	0.0449769	0.0221247	0.404668	0.501067	0.334982	0.000647333	0.0462239	4.06633	0.553216	1.36055	1.29264	1.49722	844.749	835.889	851.459
247	Line 18 20MAL13m-28317_area16-line2	20MAL13m-28317	16	VSN	VSN0	44.76	23.04	0.685	0.731	13.02	8.44	7.16	0.024	1.437	99.33	1.74611	0.962908	0.0518059	0.0241511	0.424771	0.490849	0.329173	0.000740179	0.0421681	4.07267	0.536084	1.58919	1.44653	1.7953	841.031	834.615	847.388
248	Line 17 20MAL13m-28317_area16-line2	20MAL13m-28317	16	VSN	VSN0	45.06	23.01	0.708	0.668	12.98	8.46	7.06	0	1.409	99.354	1.75455	0.959871	0.0534461	0.0220287	0.422681	0.4911	0.323973	0	0.0412697	4.06892	0.537437	1.47073	1.33903	1.66017	788.572	784.775	791.892
249	Line 16 20MAL13m-28317_area16-line2	20MAL13m-28317	16	VSN	VSN0	45.02	23.14	0.727	0.677	12.88	8.64	6.95	0.028	1.404	99.466	1.75184	0.96466	0.0548443	0.0223109	0.419149	0.501219	0.318716	0.000861374	0.0410963	4.0747	0.544585	1.83865	1.6353	2.05338	849.831	841.211	859.028
250	Line 15 20MAL13m-28317_area16-line2	20MAL13m-28317	16	VSN	VSN0	45.2	23.29	0.643	0.721	12.52	8.82	6.84	0.035	1.413	99.498	1.75576	0.969208	0.0484223	0.0237192	0.406718	0.510763	0.313121	0.00107483	0.0412871	4.07007	0.556701	2.00243	1.85044	2.15866	869.479	858.914	879.809
251	Line 14 20MAL13m-28317_area16-line2	20MAL13m-28317	16	VSN	VSN0	44.75	23.16	0.643	0.745	13.11	8.28	7.26	0	1.354	99.315	1.7464	0.968302	0.0486485	0.0246232	0.427875	0.481732	0.3339	0	0.039748	4.07123	0.529605	1.51499	1.36805	1.74317	790.291	786.924	794.86
252	Line 13 20MAL13m-28317_area16-line2	20MAL13m-28317	16	VSN	VSN0	45.26	23.21	0.645	0.84	13.06	8.54	6.75	0.028	1.174	99.505	1.76215	0.968109	0.048685	0.0276978	0.42524	0.49569	0.309714	0.000861847	0.0343828	4.07253	0.538249	2.16646	1.97238	2.37778	840.469	834.326	848.456
253	Line 12 20MAL13m-28317_area16-line2	20MAL13m-28317	16	VSN	VSN0	45.17	23.13	0.649	0.805	12.97	8.56	6.79	0	1.183	99.256	1.76191	0.966565	0.049078	0.0265931	0.423094	0.497774	0.312129	0	0.0347108	4.07185	0.540549	1.75047	1.58624	2.01605	784.098	782.133	786.415
254	Line 11 20MAL13m-28317_area16-line2	20MAL13m-28317	16	VSN	VSN0	44.8	23.19	0.624	0.805	12.88	8.55	6.92	0.027	1.471	99.267	1.74856	0.969672	0.0472166	0.0266095	0.420418	0.4975	0.318301	0.000833126	0.0431878	4.0723	0.541987	1.73598	1.56099	1.94719	848.905	840.505	856.437
255	Line 10 20MAL13m-28317_area16-line2	20MAL13m-28317	16	VSN	VSN0	45.52	22.93	0.708	0.849	13.26	8.45	6.45	0.026	1.262	99.455	1.77317	0.956917	0.0534675	0.0280088	0.431972	0.490716	0.2961	0.000800694	0.0369789	4.06813	0.531833	1.8217	1.6553	2.05636	839.993	834.422	847.311
256	Line 1 20MAL13m-28317_area16-line3	20MAL13m-28317	16	VSN	VSN0	47.53	22.4	0.855	0.598	12.8	9.25	6.65	0	1.241	101.336	1.79913	0.908372	0.0627434	0.0191705	0.405198	0.521988	0.296651	0	0.0353355	4.04858	0.562981	2.6717	2.1236	3.48533	782.776	776.44	790.627
257	Line 2 20MAL13m-28317_area16-line3	20MAL13m-28317	16	VSN	VSN0	46.36	22.68	0.786	0.62	12.9	8.98	6.17	0	1.261	99.763	1.79129	0.938831	0.0588781	0.0202886	0.416846	0.517278	0.280956	0	0.0366508	4.06102	0.553757	1.84812	1.60708	2.2952	792.884	788.128	799.878
258	Line 3 20MAL13m-28317_area16-line3	20MAL13m-28317	16	VSN	VSN0	47.12	22.64	0.864	0.721	12.89	9.03	5.11	0	0.924	99.299	1.82862	0.941275	0.0650041	0.0236969	0.418345	0.522433	0.233706	0	0.0269735	4.06005	0.55532	2.25933	1.95766	2.6508	800.031	794.557	806.894
259	Line 4 20MAL13m-28317_area16-line3	20MAL13m-28317	16	VSN	VSN0	46.7	22.54	0.856	0.744	13.14	8.89	5.31	0	0.949	99.139	1.81872	0.940426	0.0646295	0.0245392	0.427965	0.516149	0.24371	0	0.0278011	4.06394	0.546702	2.2493	1.95798	2.63419	794.827	791.294	800.533
260	Line 5 20MAL13m-28317_area16-line3	20MAL13m-28317	16	VSN	VSN0	45.26	22.86	0.779	0.887	13.57	8.19	6.71	0	1.318	99.584	1.7643	0.954674	0.0588712	0.0292832	0.442385	0.475955	0.308255	0	0.0386472	4.07237	0.518277	1.43909	1.30935	1.6632	787.583	785.325	789.246
261	Line 6 20MAL13m-28317_area16-line3	20MAL13m-28317	16	VSN	VSN0	44.71	22.86	0.689	0.831	13.4	8.28	6.63	0.026	1.281	98.707	1.75896	0.963493	0.0525506	0.0276879	0.440878	0.48563	0.307393	0.000808665	0.0379093	4.07531	0.524151	1.83963	1.6687	2.0817	840.061	833.294	847.81
262	Line 7 20MAL13m-28317_area16-line3	20MAL13m-28317	16	VSN	VSN0	44.83	22.9	0.634	0.883	13.51	8.23	6.6	0.024	1.293	98.918	1.76075	0.963576	0.0482754	0.0293716	0.44376	0.481896	0.305494	0.000745221	0.0382009	4.07207	0.5206	1.77298	1.61608	1.97057	831.404	826.065	837.504
263	Line 8 20MAL13m-28317_area16-line3	20MAL13m-28317	16	VSN	VSN0	45.26	23.24	0.656	0.897	13.33	8.35	6.53	0.032	1.297	99.617	1.76404	0.970403	0.0495685	0.0296091	0.434498	0.485183	0.299942	0.000986027	0.038026	4.07225	0.527556	2.01584	1.85534	2.15362	860.91	853.427	868.36
264	Line 9 20MAL13m-28317_area16-line3	20MAL13m-28317	16	VSN	VSN0	45.2	23.34	0.669	0.876	13.19	8.37	6.46	0	1.237	99.348	1.7658	0.976845	0.0506684	0.0289832	0.430935	0.487476	0.297417	0	0.0363512	4.07448	0.530782	1.5395	1.40857	1.73475	785.647	783.538	787.525
265	Line 10 20MAL13m-28317_area16-line3	20MAL13m-28317	16	VSN	VSN0	44.74	23.5	0.546	0.749	12.9	8.39	7.06	0	1.459	99.343	1.74548	0.982221	0.0412972	0.024748	0.420894	0.487985	0.324604	0	0.0428175	4.07005	0.536909	1.31895	1.21248	1.47268	797.845	793.771	801.113
266	Line 11 20MAL13m-28317_area16-line3	20MAL13m-28317	16	VSN	VSN0	44.44	23.49	0.602	0.617	12.18	8.73	7.4	0	1.68	99.141	1.73186	0.980718	0.0454825	0.020364	0.396963	0.507199	0.339861	0	0.0492487	4.0717	0.56096	1.30945	1.21141	1.4404	805.514	799.256	812.642
267	Line 12 20MAL13m-28317_area16-line3	20MAL13m-28317	16	VSN	VSN0	44.53	23.49	0.557	0.623	12.2	8.72	7.42	0.031	1.648	99.224	1.73349	0.979654	0.042037	0.0205397	0.397184	0.506068	0.34041	0.000954057	0.0482582	4.06859	0.560274	1.67119	1.56038	1.77904	877.559	867.72	886.435
268	Line 13 20MAL13m-28317_area16-line3	20MAL13m-28317	16	VSN	VSN0	44.95	23.79	0.521	0.59	11.58	9.03	7.4	0	1.613	99.486	1.73948	0.986295	0.0390874	0.0193366	0.374768	0.520958	0.337483	0	0.0469538	4.06437	0.581604	1.32591	1.22569	1.45633	816.548	807.616	825.604
269	Line 14 20MAL13m-28317_area16-line3	20MAL13m-28317	16	VSN	VSN0	44.5	23.85	0.49	0.575	11.76	8.94	7.54	0	1.71	99.378	1.72729	0.991781	0.0368731	0.0189022	0.381748	0.51733	0.344911	0	0.0499284	4.06876	0.575401	1.23823	1.16901	1.34536	824.19	817.698	831.485
270	Line 15 20MAL13m-28317_area16-line3	20MAL13m-28317	16	VSN	VSN0	44.05	23.51	0.548	0.674	12.33	8.52	7.51	0	1.73	98.879	1.72429	0.985912	0.0415865	0.0223441	0.403636	0.497196	0.346444	0	0.0509396	4.07235	0.55193	1.20061	1.16334	1.28347	811.771	806.299	817.165
271	Line 16 20MAL13m-28317_area16-line3	20MAL13m-28317	16	VSN	VSN0	44.57	23.37	0.648	0.721	12.93	8.48	7.02	0	1.562	99.3	1.74067	0.977808	0.0490633	0.0238477	0.422314	0.493735	0.323102	0	0.0458881	4.07643	0.538983	1.31507	1.23273	1.43644	792.162	789.596	795.611
272	Line 17 20MAL13m-28317_area16-line3	20MAL13m-28317	16	VSN	VSN0	45.04	23.16	0.701	0.768	13.58	8.34	6.59	0	1.242	99.426	1.76017	0.969656	0.0531109	0.0254189	0.443834	0.485901	0.30351	0	0.0365111	4.07812	0.522623	1.56368	1.42184	1.81535	786.052	784.002	787.913
273	20MAL13m-28317_area18-p1	20MAL13m-28317	18	VSN	VSN0	47.39	24.35	0.236	0.07	7.45	13.02	6.58	0	1.554	100.686	1.76866	0.973597	0.0170757	0.00221256	0.23253	0.724426	0.289411	0	0.043627	4.05154	0.757011	1.81359	1.56819	2.00159	1052.71	1049	1057.34
274	20MAL13m-28317_area18-p2	20MAL13m-28317	18	VSN	VSN0	44.91	24.35	0.35	0.178	11.28	10.07	7.93	0	1.455	100.524	1.71576	0.99663	0.0259232	0.00575933	0.360401	0.573545	0.35704	0	0.0418141	4.07687	0.614109	2.72872	2.44089	3.04091	992.709	976.42	1012.19
275	20MAL13m-28317_area18-p3	20MAL13m-28317	18	VSN	VSN0	44.44	24.27	0.267	0.174	11.49	9.75	8.23	0	1.482	100.122	1.70693	0.998697	0.0198821	0.00566018	0.369085	0.558305	0.372539	0	0.042819	4.07392	0.602018	2.89083	2.61467	3.21583	984.286	971.563	999.218
276	20MAL13m-28317_area18-p4	20MAL13m-28317	18	VSN	VSN0	44.71	24.3	0.356	0.191	11.27	10.11	7.77	0	1.491	100.221	1.71482	0.998488	0.0264712	0.00620421	0.361495	0.578084	0.351209	0	0.0430168	4.07979	0.615258	2.51441	2.2505	2.8333	990.5	973.863	1011.08
277	20MAL13m-28317_area18-p5	20MAL13m-28317	18	VSN	VSN0	43.78	24.07	0.343	0.231	11.43	9.79	8.02	0.025	1.585	99.273	1.69887	1.00065	0.025804	0.00759162	0.370932	0.566359	0.366765	0.000766953	0.0462657	4.084	0.604251	2.20888	1.92862	2.49505	1002.27	991.743	1013.52
278	20MAL13m-28317_area18-p6	20MAL13m-28317	18	VSN	VSN0	43.97	24.16	0.381	0.259	11.41	9.72	7.99	0	1.632	99.538	1.7018	1.00177	0.028588	0.00848964	0.369318	0.560844	0.364441	0	0.0475135	4.08276	0.602953	2.05519	1.80957	2.3456	963.178	943.805	982.848
279	20MAL13m-28317_area18-p7	20MAL13m-28317	18	VSN	VSN0	43.08	24.27	0.34	0.206	11.41	9.49	7.84	0	1.594	98.23	1.6937	1.02224	0.0259148	0.0068591	0.375155	0.556227	0.363251	0	0.0471407	4.09049	0.597206	2.13919	1.90086	2.44638	967.773	954.317	981.09
280	20MAL13m-28317_area18-p8	20MAL13m-28317	18	VSN	VSN0	43.47	24.14	0.383	0.204	11.58	9.82	7.97	0.021	1.609	99.222	1.69139	1.00627	0.0288909	0.00672238	0.376813	0.569627	0.365462	0.000645978	0.047093	4.09291	0.601863	2.04016	1.80186	2.34434	999.163	989.387	1010.39
281	20MAL13m-28317_area18-p9	20MAL13m-28317	18	VSN	VSN0	43.61	24.15	0.286	0.227	11.52	9.7	8.06	0	1.625	99.178	1.69524	1.00574	0.0215536	0.00747325	0.374508	0.562136	0.369241	0	0.0475165	4.0834	0.60016	2.38197	2.13461	2.69139	979.116	965.78	994.313
282	20MAL13m-28317_area18-p10	20MAL13m-28317	18	VSN	VSN0	43.03	24.17	0.38	0.231	11.67	9.69	8.12	0.024	1.68	98.995	1.68049	1.01126	0.0287711	0.00764039	0.381153	0.564174	0.373724	0.000741005	0.0493538	4.09731	0.596803	1.8984	1.64679	2.14652	999.197	989.017	1009.24
283	Line 2 20MAL13m-28317_area19-line1	20MAL13m-28317	19	VSN	VSN0	47.84	24.56	0.214	0.148	7.82	12.73	4.6	0.021	0.945	98.879	1.82339	1.00286	0.0158129	0.00477738	0.249264	0.72334	0.206622	0.000632781	0.0270936	4.05379	0.743715	2.06611	1.95166	2.1862	1044.9	1040.73	1048.53
284	Line 3 20MAL13m-28317_area19-line1	20MAL13m-28317	19	VSN	VSN0	48.7	24.7	0.218	0.142	7.6	13.16	4.24	0.025	0.843	99.632	1.83818	0.998799	0.0159523	0.00453927	0.239903	0.740525	0.188606	0.000746009	0.023935	4.05119	0.755308	2.3184	2.21463	2.43913	1039.58	1034.48	1044.56
285	Line 4 20MAL13m-28317_area19-line1	20MAL13m-28317	19	VSN	VSN0	48.56	24.75	0.209	0.128	7.51	13.04	4.11	0.038	0.843	99.188	1.84118	1.00535	0.0153629	0.00411024	0.238134	0.737091	0.18365	0.00113906	0.0240432	4.05006	0.755816	2.42712	2.31816	2.55269	1040.75	1036.12	1045.23
286	Line 5 20MAL13m-28317_area19-line1	20MAL13m-28317	19	VSN	VSN0	48.77	24.64	0.204	0.159	7.53	13.13	4.16	0.038	0.884	99.52	1.84188	0.996943	0.0149364	0.00508562	0.23783	0.73926	0.185153	0.00113458	0.0251134	4.04733	0.756594	2.37389	2.23594	2.50057	1040.77	1036.09	1045.41
287	Line 6 20MAL13m-28317_area19-line1	20MAL13m-28317	19	VSN	VSN0	46.27	24.56	0.231	0.156	8.69	12.08	5.72	0.022	1.212	98.941	1.77455	1.00911	0.0171755	0.00506701	0.278722	0.690685	0.258532	0.000667046	0.0349653	4.06947	0.712482	2.21396	2.11816	2.30575	1052.86	1048.48	1057.08
288	Line 7 20MAL13m-28317_area19-line1	20MAL13m-28317	19	VSN	VSN0	46.52	24.56	0.25	0.166	8.56	12.01	5.74	0	1.23	99.052	1.78015	1.00686	0.0185467	0.00537978	0.27394	0.68515	0.258857	0	0.0354053	4.06429	0.714375	2.20026	2.1029	2.28914	1047.22	1042.29	1051.29
289	Line 8 20MAL13m-28317_area19-line1	20MAL13m-28317	19	VSN	VSN0	47.71	24.01	0.32	0.175	8.21	12.78	5.4	0.081	0.988	99.688	1.80437	0.972816	0.0234625	0.00560523	0.259671	0.720564	0.24068	0.00242185	0.0281073	4.0577	0.735093	1.80514	1.67378	1.9508	1061.63	1056.41	1066.74
290	Line 9 20MAL13m-28317_area19-line1	20MAL13m-28317	19	VSN	VSN0	48.33	24.48	0.258	0.164	7.95	12.86	4.74	0.041	0.917	99.745	1.82489	0.990268	0.0188863	0.00524447	0.251044	0.723911	0.210925	0.00122391	0.0260456	4.05244	0.742507	1.95051	1.85724	2.08938	1048.94	1044.32	1053.81
291	Line 10 20MAL13m-28317_area19-line1	20MAL13m-28317	19	VSN	VSN0	46.98	24.49	0.214	0.134	8.15	12.55	4.98	0.049	1.042	98.607	1.80147	1.00606	0.0159087	0.00435168	0.261357	0.717434	0.225047	0.00148544	0.0300557	4.06317	0.73298	1.95965	1.88023	2.04361	1055.27	1051.31	1058.25
292	Line 11 20MAL13m-28317_area19-line1	20MAL13m-28317	19	VSN	VSN0	46.89	24.62	0.211	0.131	8.26	12.48	5.18	0	1.165	98.949	1.79318	1.00868	0.0156435	0.00424281	0.264172	0.711513	0.233455	0	0.0335132	4.0644	0.729244	2.03247	1.92231	2.12611	1046.35	1042.17	1049.46
293	Line 12 20MAL13m-28317_area19-line1	20MAL13m-28317	19	VSN	VSN0	48.22	24.73	0.225	0.128	7.9	13	4.45	0	0.905	99.577	1.82564	1.00308	0.016515	0.00410428	0.250137	0.733764	0.198554	0	0.0257741	4.05757	0.74577	2.1065	1.99632	2.22002	1042.86	1038.45	1046.98
294	Line 13 20MAL13m-28317_area19-line1	20MAL13m-28317	19	VSN	VSN0	47.39	24.58	0.236	0.207	7.93	12.74	4.73	0.032	1.022	98.867	1.81017	1.00586	0.0174764	0.00669641	0.25332	0.725483	0.212924	0.000966335	0.029365	4.06226	0.741194	1.82412	1.74136	1.93531	1040.12	1030.44	1046.79
295	Line 14 20MAL13m-28317_area19-line1	20MAL13m-28317	19	VSN	VSN0	47.57	24.61	0.244	0.125	8.12	12.62	5.06	0.053	1.082	99.483	1.80545	1.00066	0.0179535	0.00401792	0.257734	0.714062	0.226325	0.00159028	0.0308905	4.05868	0.734786	1.89953	1.82866	1.97774	1055.56	1051.24	1058.28
296	Line 15 20MAL13m-28317_area19-line1	20MAL13m-28317	19	VSN	VSN0	47.23	24.63	0.213	0.167	8.14	12.67	5.04	0.044	1.064	99.22	1.79977	1.00551	0.0157358	0.00538958	0.259411	0.719782	0.226339	0.00132555	0.0304991	4.06376	0.735077	1.91579	1.84164	1.99648	1055.26	1051.33	1058.83
297	Line 16 20MAL13m-28317_area19-line1	20MAL13m-28317	19	VSN	VSN0	48.24	24.6	0.247	0.124	7.49	13.03	4.45	0.048	0.948	99.188	1.82937	0.99943	0.0181594	0.0039825	0.237542	0.736656	0.198877	0.00143907	0.0270427	4.0525	0.756166	2.22822	2.10302	2.34095	1046.77	1043.67	1050.91
298	Line 17 20MAL13m-28317_area19-line1	20MAL13m-28317	19	VSN	VSN0	48.15	24.64	0.227	0.148	7.35	13.26	4.47	0.046	0.929	99.238	1.82488	1.00046	0.0166791	0.00475048	0.232964	0.749214	0.199653	0.00137829	0.026485	4.05646	0.762809	2.26327	2.12502	2.39215	1045.86	1042.41	1049.4
299	Line 1 20MAL13m-28317_area17-line1	20MAL13m-28317	17	VSN	VSN0	46.43	23.63	0.59	0.448	11.76	9.78	6.16	0	0.873	99.683	1.7887	0.975268	0.0440655	0.0146169	0.378886	0.561697	0.279672	0	0.0252987	4.0682	0.597179	2.21782	1.83903	2.71412	842.687	831.02	854.473
300	Line 2 20MAL13m-28317_area17-line1	20MAL13m-28317	17	VSN	VSN0	46.9	23.33	0.713	0.565	12.74	9.39	5.59	0	0.766	99.994	1.80789	0.963464	0.053284	0.0184453	0.410707	0.539622	0.253946	0	0.0222113	4.06957	0.567826	2.94357	2.40492	3.5033	827.531	819.72	834.735
301	Line 3 20MAL13m-28317_area17-line1	20MAL13m-28317	17	VSN	VSN0	46.14	23.51	0.668	0.479	12.56	9.35	6.07	0	0.857	99.657	1.78626	0.975085	0.0501363	0.0157052	0.40665	0.53964	0.276941	0	0.0249571	4.07538	0.570269	2.44702	2.08509	2.98405	828.628	819.671	835.969
302	Line 4 20MAL13m-28317_area17-line1	20MAL13m-28317	17	VSN	VSN0	46.22	23.53	0.628	0.466	12.28	9.54	6.05	0	0.819	99.538	1.78834	0.975359	0.0471074	0.0152702	0.397359	0.550293	0.275871	0	0.023837	4.07344	0.580691	2.33751	1.97361	2.77956	833.745	825.523	841.893
303	Line 5 20MAL13m-28317_area17-line1	20MAL13m-28317	17	VSN	VSN0	46.26	23.5	0.611	0.479	12.29	9.41	5.85	0	0.816	99.233	1.79569	0.977274	0.0459807	0.0157471	0.398972	0.544554	0.267616	0	0.0238266	4.06966	0.577148	2.04192	1.71227	2.4665	839.7	832.917	846.496
304	Line 6 20MAL13m-28317_area17-line1	20MAL13m-28317	17	VSN	VSN0	47.45	23	0.812	0.692	13.15	9.07	4.65	0	0.643	99.468	1.84129	0.956169	0.0610871	0.0227421	0.426751	0.524707	0.212651	0	0.018769	4.06416	0.551477	3.30252	2.98756	3.66035	805.321	799.147	812.619
305	Line 7 20MAL13m-28317_area17-line1	20MAL13m-28317	17	VSN	VSN0	46.43	22.99	0.778	0.659	13.85	8.56	5.49	0	0.79	99.548	1.80849	0.959355	0.0587498	0.0217392	0.451161	0.497069	0.252012	0	0.0231468	4.07173	0.524207	2.66288	2.3253	3.06462	800.231	793.657	808.145
306	Line 8 20MAL13m-28317_area17-line1	20MAL13m-28317	17	VSN	VSN0	46.26	23.06	0.818	0.562	13.73	8.58	5.69	0	0.821	99.58	1.80162	0.962143	0.0617618	0.0185367	0.447191	0.498162	0.261157	0	0.0240518	4.07463	0.526959	3.04062	2.67026	3.43305	817.253	810.392	823.662
307	Line 9 20MAL13m-28317_area17-line1	20MAL13m-28317	17	VSN	VSN0	46.17	23.06	0.803	0.586	13.66	8.47	5.77	0	0.826	99.356	1.80102	0.963693	0.060727	0.0193595	0.445627	0.492568	0.265255	0	0.0242373	4.07248	0.525016	2.82187	2.50343	3.24681	809.705	802.236	816.14
308	Line 10 20MAL13m-28317_area17-line1	20MAL13m-28317	17	VSN	VSN0	46.08	23.17	0.84	0.569	13.65	8.47	5.78	0	0.83	99.393	1.7978	0.96845	0.0635356	0.018801	0.445375	0.492649	0.265758	0	0.0243587	4.07673	0.525199	2.94117	2.61127	3.40482	812.777	805.677	819.595
309	Line 11 20MAL13m-28317_area17-line1	20MAL13m-28317	17	VSN	VSN0	45.56	23.07	0.762	0.6	13.74	8.49	6.24	0	0.954	99.447	1.77857	0.964845	0.0576702	0.0198371	0.448579	0.494107	0.28708	0	0.0280145	4.07871	0.524148	2.33746	2.03455	2.68861	797.566	792.995	803.813
310	20MAL13m-28317_area4a-p1	20MAL13m-28317	4A	VSN	VSN0	41.44	23.08	0.683	0.508	15.12	6.87	9.57	0.027	1.96	99.264	1.64137	0.979363	0.0524463	0.0170407	0.500843	0.405665	0.446712	0.000845463	0.0583967	4.10268	0.447503	1.69772	1.53333	1.85803	860.974	854.947	867.387
311	20MAL13m-28317_area4a-p2	20MAL13m-28317	4A	VSN	VSN0	43.67	22.91	0.71	0.598	15.3	7.3	7.51	0	1.194	99.198	1.72575	0.969935	0.0543954	0.0200141	0.505651	0.430074	0.349756	0	0.0354933	4.09107	0.459616	2.11866	1.76057	2.5482	792.704	788.466	798.573
312	20MAL13m-28317_area4a-p3	20MAL13m-28317	4A	VSN	VSN0	42.21	23.45	0.582	0.412	14.02	7.59	9.1	0	1.71	99.11	1.66449	0.990671	0.0444934	0.0137594	0.462356	0.446202	0.422899	0	0.0507232	4.09559	0.49111	1.17239	1.14226	1.29979	840.082	834.72	846.549
313	20MAL13m-28317_area4a-p4	20MAL13m-28317	4A	VSN	VSN0	44.8	23.24	0.689	0.52	13.88	8.18	7.02	0	0.994	99.356	1.75327	0.97438	0.0522755	0.017235	0.45428	0.477253	0.323771	0	0.0292619	4.08172	0.512331	2.29504	2.03033	2.59285	802.664	798.203	807.578
314	20MAL13m-28317_area4a-p5	20MAL13m-28317	4A	VSN	VSN0	42.76	23.43	0.67	0.466	13.76	7.83	8.92	0	1.567	99.412	1.67717	0.984542	0.0509475	0.0154798	0.451359	0.457854	0.412321	0	0.0462333	4.09591	0.503572	1.29749	1.16757	1.48088	838.315	833.612	842.754
315	20MAL13m-28317_area4a-p6	20MAL13m-28317	4A	VSN	VSN0	41.1	23.39	0.571	0.42	14.37	7.03	10.09	0.021	1.89	98.882	1.62911	0.993258	0.0438787	0.0140993	0.476354	0.415422	0.471336	0.000658073	0.0563531	4.10047	0.465837	1.29983	1.23565	1.48073	857.811	852.821	864.695
316	20MAL13m-28317_area4a-p7	20MAL13m-28317	4A	VSN	VSN0	39.95	23.41	0.539	0.316	15	6.54	11.16	0	2.19	99.111	1.5865	0.995971	0.0414974	0.0106279	0.498171	0.387192	0.522297	0	0.0654205	4.10768	0.437326	3.24253	2.59295	4.03088	883.752	870.475	899.151
317	20MAL13m-28317_area4a-p8	20MAL13m-28317	4A	VSN	VSN0	41.66	23.46	0.603	0.446	13.7	7.58	9.16	0	1.92	98.551	1.65258	0.996995	0.0463734	0.0149836	0.454493	0.448267	0.428222	0	0.0572915	4.0992	0.496552	1.17655	1.133	1.25124	844.058	837.266	848.715
318	20MAL13m-28317_area4a-p9	20MAL13m-28317	4A	VSN	VSN0	40.88	23.33	0.562	0.427	14.29	7.04	10.03	0	1.91	98.5	1.62749	0.995048	0.0433763	0.0143971	0.475777	0.417835	0.470585	0	0.0571988	4.10171	0.46758	1.21644	1.16285	1.33602	832.729	828.408	839.943
319	20MAL13m-28317_area4a-p10	20MAL13m-28317	4A	VSN	VSN0	39.29	23.28	0.523	0.348	14.96	6.32	11.61	0	2.14	98.472	1.57162	0.99763	0.0405578	0.0117892	0.500449	0.376883	0.547302	0	0.0643909	4.11062	0.429579	4.43924	3.55785	5.27637	885.566	871.685	906.095
320	20MAL13m-28317_area4a-p11	20MAL13m-28317	4A	VSN	VSN0	38.96	23.3	0.521	0.328	14.19	6.53	11.92	0	2.84	98.606	1.55208	0.994425	0.0402384	0.0110664	0.472759	0.387822	0.559629	0	0.0851057	4.10312	0.450651	4.97404	4.01584	5.65625	925.838	905.008	944.416
321	20MAL13m-28317_area4a-p12	20MAL13m-28317	4A	VSN	VSN0	41.36	23.17	0.551	0.469	14.07	7.34	9.62	0.025	1.95	98.554	1.64179	0.985335	0.0424029	0.0157669	0.467083	0.434367	0.45003	0.000784551	0.058226	4.09578	0.481854	1.31905	1.23134	1.39756	871.893	865.966	879.101
322	20MAL13m-28317_area4a-p13	20MAL13m-28317	4A	VSN	VSN0	40.75	23.21	0.542	0.421	14.21	7.23	10.24	0	2.21	98.865	1.6156	0.985836	0.0416596	0.0141361	0.471157	0.427337	0.478451	0	0.0659092	4.10009	0.475615	1.26954	1.21662	1.53525	839.036	833.553	846.844
323	20MAL13m-28317_area4a-p14	20MAL13m-28317	4A	VSN	VSN0	39.07	23.3	0.525	0.369	15.11	6.25	11.52	0	2.31	98.496	1.56575	1.00036	0.0407894	0.012524	0.506416	0.373409	0.544079	0	0.0696366	4.11297	0.424413	4.05866	3.16331	4.96597	872.106	858.892	890.451
324	20MAL13m-28317_area4a-p15	20MAL13m-28317	4A	VSN	VSN0	40.94	23.36	0.529	0.426	13.65	7.12	10.39	0	2.24	98.672	1.62089	0.99083	0.040604	0.0142841	0.451961	0.420252	0.484786	0	0.0667112	4.09031	0.481823	1.30476	1.22873	1.89259	851.01	842.019	858.308
325	20MAL13m-28317_area4a-p16	20MAL13m-28317	4A	VSN	VSN0	39.38	23.37	0.505	0.307	13.12	7.16	11.78	0	3.29	98.923	1.55481	0.988515	0.0386547	0.0102655	0.433212	0.421445	0.548123	0	0.0977113	4.09274	0.493116	4.28982	3.32189	5.0034	953.902	937.533	974.701
326	20MAL13m-28317_area4a-p17	20MAL13m-28317	4A	VSN	VSN0	41.03	23.41	0.565	0.412	14.44	7.06	10.2	0.024	1.93	99.071	1.62387	0.992597	0.0433517	0.0138097	0.477948	0.416562	0.475751	0.000750941	0.0574583	4.1021	0.465687	1.41777	1.30392	1.66884	865.957	859.928	873.731
327	Line 1 20MAL13m-28317_area6D-line1	20MAL13m-28317	6D	VSN	VSN0	41.91	23.1	0.58	0.629	15.15	6.97	8.51	0	1.72	98.6	1.67244	0.98757	0.0448715	0.021258	0.505604	0.41466	0.400215	0	0.0516308	4.09825	0.450588	1.31776	1.2385	1.40672	806.237	802.772	810.459
328	Line 2 20MAL13m-28317_area6D-line1	20MAL13m-28317	6D	VSN	VSN0	41.7	23.07	0.569	0.668	15.43	6.68	8.88	0	1.73	98.736	1.66361	0.986017	0.0440084	0.0225699	0.514807	0.397298	0.417502	0	0.0519167	4.09773	0.435584	1.42961	1.33329	1.51634	800.49	798.068	804.194
329	Line 3 20MAL13m-28317_area6D-line1	20MAL13m-28317	6D	VSN	VSN0	42.98	23.51	0.516	0.522	13.39	8.06	8.07	0	1.83	98.878	1.69299	0.992117	0.0394045	0.017414	0.441095	0.473313	0.374621	0	0.0542232	4.08518	0.517617	1.12346	1.10768	1.15372	839.9	833.618	844.615
330	Line 4 20MAL13m-28317_area6D-line1	20MAL13m-28317	6D	VSN	VSN0	43.05	23.42	0.602	0.532	13.43	8.03	8.14	0	1.83	99.043	1.69299	0.986713	0.0458973	0.0177187	0.441694	0.470785	0.377256	0	0.0541351	4.08719	0.51594	1.14229	1.11034	1.20159	836.521	830.594	841.667
331	Line 5 20MAL13m-28317_area6D-line1	20MAL13m-28317	6D	VSN	VSN0	43.27	23.75	0.433	0.436	13.02	8.36	8.35	0.02	1.626	99.265	1.69293	0.995491	0.0328434	0.014447	0.426016	0.487621	0.385007	0.000618624	0.047854	4.08283	0.533714	1.23367	1.17996	1.31968	883.183	879.909	886.016
332	Line 6 20MAL13m-28317_area6D-line1	20MAL13m-28317	6D	VSN	VSN0	43.09	23.66	0.426	0.439	13.18	8.21	8.58	0.026	1.617	99.228	1.68754	0.992691	0.0323441	0.0145607	0.431675	0.479342	0.396	0.000805	0.0476358	4.08259	0.526162	1.37601	1.30677	1.48526	894.616	889.883	899.163
333	Line 7 20MAL13m-28317_area6D-line1	20MAL13m-28317	6D	VSN	VSN0	42.75	23.45	0.563	0.5	13.41	7.97	8.66	0	1.71	99.022	1.6812	0.987978	0.0429239	0.016653	0.441037	0.467268	0.401357	0	0.0505854	4.089	0.514439	1.13347	1.11613	1.17177	844.711	839.172	847.856
334	Line 8 20MAL13m-28317_area6D-line1	20MAL13m-28317	6D	VSN	VSN0	42.57	23.57	0.465	0.42	13.56	7.97	8.87	0	1.661	99.097	1.6738	0.992847	0.0354456	0.0139858	0.445886	0.46718	0.411012	0	0.0491266	4.08929	0.51166	1.21607	1.15907	1.30339	846.589	841.325	850.443
335	Line 9 20MAL13m-28317_area6D-line1	20MAL13m-28317	6D	VSN	VSN0	42.57	23.61	0.446	0.449	13.23	8.06	8.73	0.021	1.638	98.77	1.67765	0.996818	0.0340754	0.0149859	0.436035	0.473541	0.405455	0.000654278	0.0485577	4.08777	0.520617	1.25311	1.19902	1.32521	884.209	879.356	887.839
336	Line 10 20MAL13m-28317_area6D-line1	20MAL13m-28317	6D	VSN	VSN0	42.91	23.45	0.558	0.468	13.01	8.22	8.22	0	1.71	98.553	1.6925	0.990911	0.042669	0.0156334	0.429152	0.483356	0.382096	0	0.0507356	4.08705	0.5297	1.12932	1.11031	1.17274	845.561	842.244	847.906
337	Line 11 20MAL13m-28317_area6D-line1	20MAL13m-28317	6D	VSN	VSN0	43.17	23.51	0.465	0.422	13.25	8.31	8.17	0.045	1.69	99.032	1.69468	0.988735	0.0353889	0.01403	0.434995	0.48633	0.37797	0.00139657	0.0499043	4.08343	0.527859	1.7061	1.59143	1.8263	939.843	931.964	947.592
338	Line 12 20MAL13m-28317_area6D-line1	20MAL13m-28317	6D	VSN	VSN0	43.11	23.45	0.537	0.506	13.09	8.34	8.24	0	1.77	99.055	1.69168	0.985835	0.0408528	0.0168162	0.429579	0.4879	0.381063	0	0.0522467	4.08597	0.531783	1.13181	1.11031	1.18311	843.76	839.476	846.605
339	Line 13 20MAL13m-28317_area6D-line1	20MAL13m-28317	6D	VSN	VSN0	42.63	23.55	0.517	0.439	12.94	8.25	8.57	0	1.78	98.676	1.67932	0.993876	0.0394837	0.0146461	0.426302	0.484505	0.39786	0	0.0527455	4.08874	0.531951	1.14185	1.11946	1.1942	849.355	847.208	850.985
340	Line 14 20MAL13m-28317_area6D-line1	20MAL13m-28317	6D	VSN	VSN0	42.41	23.59	0.55	0.41	13.03	8.3	8.77	0	1.81	98.875	1.66892	0.994527	0.0419602	0.0136644	0.42882	0.486934	0.406721	0	0.0535786	4.09512	0.53173	1.1625	1.1333	1.27818	850.1	847.753	852.567
341	Line 15 20MAL13m-28317_area6D-line1	20MAL13m-28317	6D	VSN	VSN0	44.74	23.3	0.67	0.481	12.45	8.65	7.5	0	1.362	99.155	1.74183	0.971826	0.0505701	0.0158597	0.405362	0.502055	0.344114	0	0.0398872	4.07151	0.553279	1.60502	1.39745	1.93602	817.526	808.497	825.512
342	Line 16 20MAL13m-28317_area6D-line1	20MAL13m-28317	6D	VSN	VSN0	44.79	23.35	0.718	0.547	12.58	8.59	7.41	0	1.369	99.354	1.74235	0.973111	0.0541485	0.018021	0.409259	0.498163	0.339705	0	0.0400593	4.07481	0.548987	1.55009	1.38133	1.8283	799.434	791.456	808.473
343	Line 17 20MAL13m-28317_area6D-line1	20MAL13m-28317	6D	VSN	VSN0	42.55	23.17	0.547	0.562	14.38	7.49	8.24	0	1.72	98.67	1.68765	0.984537	0.042061	0.0188781	0.476987	0.442885	0.38516	0	0.0513167	4.08948	0.481464	1.17948	1.14457	1.24209	821.724	816.982	826.535
344	Line 18 20MAL13m-28317_area6D-line1	20MAL13m-28317	6D	VSN	VSN0	43.83	23.29	0.651	0.567	13.36	8.09	7.49	0	1.491	98.769	1.72514	0.982074	0.0496755	0.0189006	0.439767	0.474708	0.347428	0	0.0441445	4.08184	0.519104	1.30468	1.21152	1.44831	811.385	804.602	818.788
345	Line 10 20MAL13m-28317_area1c-line1	20MAL13m-28317	1C	VSN	VSN0	47.2	23.03	0.784	0.59	12.3	9.66	4.36	0	0.602	98.534	1.84335	0.963567	0.0593595	0.0195145	0.401731	0.56243	0.20067	0	0.0176852	4.06831	0.583336	3.90793	3.59928	4.21021	827.204	819.001	835.778
346	Line 11 20MAL13m-28317_area1c-line1	20MAL13m-28317	1C	VSN	VSN0	45.93	23.25	0.671	0.503	12.1	9.42	5.61	0	0.965	98.449	1.79676	0.974401	0.050889	0.0166648	0.39586	0.549374	0.258634	0	0.0283966	4.07098	0.581204	2.15865	1.80243	2.65259	837.233	830.173	844.074
347	Line 12 20MAL13m-28317_area1c-line1	20MAL13m-28317	1C	VSN	VSN0	45.73	23.28	0.628	0.463	11.87	9.57	5.82	0.022	1.006	98.389	1.78839	0.97536	0.0476133	0.0153349	0.388217	0.557952	0.268234	0.000680186	0.029594	4.07137	0.589696	2.17837	1.86313	2.50037	876.395	863.222	890.206
348	Line 15 20MAL13m-28317_area1c-line1	20MAL13m-28317	1C	VSN	VSN0	45.78	22.93	0.68	0.567	12.73	9.04	5.42	0.043	0.93	98.132	1.80213	0.967024	0.0518953	0.0189031	0.419086	0.530523	0.251444	0.00133821	0.0275385	4.06988	0.558675	2.77319	2.52654	3.11643	936.157	928.136	945.644
349	Line 18 20MAL13m-28317_area1c-line1	20MAL13m-28317	1C	VSN	VSN0	45.87	23.26	0.591	0.462	11.78	9.61	5.55	0.029	0.903	98.055	1.79876	0.977182	0.0449304	0.0153435	0.386325	0.561814	0.256488	0.000899056	0.0266366	4.06838	0.592544	2.2091	1.90576	2.53747	909.141	895.889	922.955
350	Line 19 20MAL13m-28317_area1c-line1	20MAL13m-28317	1C	VSN	VSN0	45.45	23.19	0.617	0.45	12.12	9.47	5.8	0	0.953	98.062	1.78628	0.976421	0.0470119	0.0149784	0.398365	0.554868	0.268641	0	0.0281743	4.07474	0.582091	1.87914	1.58074	2.19089	841.662	835.148	849.906
351	Line 20 20MAL13m-28317_area1c-line1	20MAL13m-28317	1C	VSN	VSN0	45.46	23.08	0.673	0.499	12.71	8.91	5.97	0	1.012	98.325	1.78613	0.971498	0.0512634	0.0166044	0.417632	0.5219	0.276432	0	0.0299096	4.07137	0.555489	1.98985	1.75059	2.36571	823.954	815.125	830.552
352	Line 21 20MAL13m-28317_area1c-line1	20MAL13m-28317	1C	VSN	VSN0	43.13	23.01	0.715	0.481	14.07	7.94	7.88	0	1.516	98.755	1.70445	0.974189	0.0547796	0.0160986	0.46501	0.467789	0.366996	0	0.0450661	4.09438	0.50149	1.3638	1.28514	1.53504	826.054	821.801	830.554
353	Line 22 20MAL13m-28317_area1c-line1	20MAL13m-28317	1C	VSN	VSN0	46.39	22.94	0.677	0.579	12.63	9.41	4.95	0	0.685	98.274	1.8207	0.964563	0.0515124	0.0192456	0.414555	0.550592	0.228955	0	0.0202233	4.07035	0.570475	2.84686	2.36878	3.31205	827.958	820.127	836.541
354	Line 24 20MAL13m-28317_area1c-line1	20MAL13m-28317	1C	VSN	VSN0	43.45	23.03	0.69	0.481	13.55	8.41	7.31	0	1.3	98.234	1.72197	0.977802	0.0530142	0.0161443	0.449095	0.496885	0.341415	0	0.0387547	4.09508	0.52526	1.61833	1.43726	1.97892	811.682	805.667	818.503
355	Line 25 20MAL13m-28317_area1c-line1	20MAL13m-28317	1C	VSN	VSN0	44.08	23.07	0.651	0.512	13.4	8.64	6.76	0	1.144	98.258	1.74346	0.977552	0.0499183	0.0171506	0.44324	0.509459	0.315099	0	0.0340363	4.08991	0.534753	1.8693	1.63237	2.12546	801.95	795.567	808.581
356	Line 27 20MAL13m-28317_area1c-line1	20MAL13m-28317	1C	VSN	VSN0	45.19	22.98	0.638	0.479	12.93	9.12	6.77	0.023	1.134	99.264	1.75912	0.958352	0.0481484	0.0157916	0.420935	0.529265	0.310579	0.000707825	0.0332057	4.0761	0.557003	2.23296	1.96993	2.58148	841.214	823.012	854.538
357	Line 1 19CJ09-28065_area20C-line1	19CJ09-28065	20C	SLV	SLVt	45.4	23.37	0.316	0.158	9.75	11.3	7.63	0	1.429	99.353	1.73597	0.957342	0.0234251	0.00511661	0.311785	0.644154	0.343828	0	0.0411022	4.06273	0.673845	3.48306	3.11406	3.85016	1061.03	1049.98	1071.23
358	Line 2 19CJ09-28065_area20C-line1	19CJ09-28065	20C	SLV	SLVt	45.4	23.4	0.296	0.204	9.9	10.96	7.58	0	1.426	99.166	1.74066	0.96116	0.0220018	0.0066241	0.317436	0.62646	0.342497	0	0.0411267	4.05797	0.663696	3.22559	2.84299	3.66093	1050.16	1033.2	1065.75
359	Line 3 19CJ09-28065_area20C-line1	19CJ09-28065	20C	SLV	SLVt	45.47	23.36	0.37	0.196	9.85	11.1	7.26	0.027	1.378	99.029	1.74643	0.961218	0.027551	0.00637561	0.316393	0.635587	0.32862	0.000819852	0.0398128	4.06281	0.667647	3.37742	2.9736	3.71264	1057.85	1048.63	1068.22
360	Line 4 19CJ09-28065_area20C-line1	19CJ09-28065	20C	SLV	SLVt	45.77	23.35	0.397	0.208	9.78	11.04	7.19	0	1.39	99.126	1.75414	0.95872	0.0294973	0.00675126	0.313462	0.630779	0.324745	0	0.0400723	4.05817	0.668027	3.18589	2.83303	3.53443	1039.67	1026.52	1051.85
361	Line 5 19CJ09-28065_area20C-line1	19CJ09-28065	20C	SLV	SLVt	44.72	23.14	0.393	0.245	10.6	10.44	7.8	0	1.7	99.056	1.72449	0.955969	0.0293805	0.00800135	0.341844	0.600183	0.354473	0	0.0493121	4.06365	0.637119	2.21372	1.88749	2.59992	1017.73	994.182	1039.93
362	Line 6 19CJ09-28065_area20C-line1	19CJ09-28065	20C	SLV	SLVt	45.78	23.26	0.319	0.252	10.05	10.96	6.86	0	1.435	98.936	1.76041	0.958231	0.0237814	0.00820688	0.323198	0.62831	0.31088	0	0.0415085	4.05453	0.660331	2.4982	2.15974	2.87019	1016.48	994.511	1032.42
363	Line 7 19CJ09-28065_area20C-line1	19CJ09-28065	20C	SLV	SLVt	44.19	23.13	0.408	0.245	10.87	10.07	8.02	0	1.86	98.794	1.71233	0.960199	0.0306501	0.00804023	0.352255	0.581725	0.366242	0	0.0542154	4.06566	0.622846	1.82309	1.54467	2.16524	1001.41	982.429	1022.82
364	Line 8 19CJ09-28065_area20C-line1	19CJ09-28065	20C	SLV	SLVt	43.75	23.13	0.418	0.254	11.06	9.79	8.32	0	1.94	98.663	1.70045	0.963126	0.0314971	0.00836099	0.359504	0.567274	0.3811	0	0.0567196	4.06803	0.612092	1.71342	1.44751	2.07063	988.993	967.38	1006.25
365	Line 9 19CJ09-28065_area20C-line1	19CJ09-28065	20C	SLV	SLVt	42.84	23.07	0.468	0.266	11.51	9.41	8.99	0.02	2.26	98.833	1.66861	0.962662	0.0353394	0.00877455	0.374924	0.54641	0.412662	0.000615856	0.0662154	4.07621	0.593064	1.38023	1.14654	1.66537	989.334	972.603	1008.19
366	Line 10 19CJ09-28065_area20C-line1	19CJ09-28065	20C	SLV	SLVt	45.44	21.9	0.542	0.286	11.16	10.34	9.88	0	2.03	101.588	1.69999	0.877757	0.0393112	0.00906177	0.349169	0.576705	0.435608	0	0.0571282	4.04473	0.622876	3.87448	3.18262	4.86323	992.398	972.488	1017.69
367	Line 11 19CJ09-28065_area20C-line1	19CJ09-28065	20C	SLV	SLVt	44.14	23.07	0.409	0.261	11.05	9.85	8.13	0	1.85	98.769	1.71203	0.958623	0.0307546	0.00857349	0.35843	0.56956	0.37162	0	0.0539755	4.06356	0.613757	1.85569	1.55451	2.18514	982.75	959.968	1003.88
368	Line 12 19CJ09-28065_area20C-line1	19CJ09-28065	20C	SLV	SLVt	44.66	23.15	0.404	0.261	10.66	10.2	7.63	0	1.69	98.671	1.73005	0.960756	0.030341	0.00856287	0.345351	0.589067	0.348333	0	0.0492462	4.06171	0.630411	2.03111	1.79617	2.344	988.546	967.076	1013.06
369	Line 13 19CJ09-28065_area20C-line1	19CJ09-28065	20C	SLV	SLVt	46.22	23.22	0.412	0.288	9.96	10.9	6.42	0	1.337	98.775	1.77884	0.957395	0.0307406	0.00938724	0.320575	0.6254	0.291187	0	0.0387065	4.05223	0.661117	2.2902	2.0205	2.61103	967.034	948.64	991.627
370	Line 14 19CJ09-28065_area20C-line1	19CJ09-28065	20C	SLV	SLVt	44.49	23.1	0.403	0.254	10.7	10.38	7.68	0	1.71	98.736	1.72324	0.958558	0.030262	0.00833215	0.346603	0.599386	0.350571	0	0.0498226	4.06678	0.633608	2.09335	1.8165	2.4314	1004.43	978.973	1027.13
371	Line 15 19CJ09-28065_area20C-line1	19CJ09-28065	20C	SLV	SLVt	43.82	23.06	0.404	0.287	10.86	9.84	8.11	0.031	1.91	98.334	1.70752	0.962661	0.0305198	0.00947137	0.353904	0.571626	0.372429	0.00095499	0.055985	4.06507	0.61762	1.67696	1.39498	2.04195	993.519	977.87	1013.51
372	Line 16 19CJ09-28065_area20C-line1	19CJ09-28065	20C	SLV	SLVt	45.87	23.42	0.326	0.168	9.35	11.22	7.22	0.037	1.33	98.941	1.75699	0.961056	0.0242084	0.00544989	0.299513	0.640704	0.325917	0.00112043	0.0383211	4.05328	0.681443	3.6051	3.2086	3.93608	1071.68	1064.35	1078.55
373	Line 17 19CJ09-28065_area20C-line1	19CJ09-28065	20C	SLV	SLVt	45.89	23.44	0.339	0.166	9.28	11.22	7.28	0	1.34	98.963	1.75673	0.961318	0.0251591	0.00538189	0.297098	0.640332	0.328435	0	0.0385868	4.05304	0.683072	3.60472	3.21049	3.94463	1056.99	1047.5	1067.96
374	Line 18 19CJ09-28065_area20C-line1	19CJ09-28065	20C	SLV	SLVt	45.52	23.41	0.297	0.174	9.45	11.14	7.5	0.024	1.434	98.968	1.74507	0.961464	0.0220737	0.00564934	0.302974	0.636678	0.338845	0.000727388	0.0413528	4.05483	0.677568	3.42255	3.02817	3.81825	1066.62	1057.67	1074.72
375	Line 19 19CJ09-28065_area20C-line1	19CJ09-28065	20C	SLV	SLVt	45.79	23.44	0.268	0.177	9.28	11.24	7.32	0	1.365	98.88	1.75426	0.962063	0.0199052	0.00574296	0.297328	0.641971	0.330495	0	0.0393372	4.05111	0.683458	3.56058	3.16295	3.9058	1058	1047.53	1069.23
376	Line 20 19CJ09-28065_area20C-line1	19CJ09-28065	20C	SLV	SLVt	45.97	23.41	0.29	0.177	9.31	11.1	7.27	0	1.336	98.863	1.76078	0.960626	0.0215346	0.00574173	0.298225	0.633839	0.328167	0	0.0384932	4.04741	0.680038	3.55651	3.18181	3.89143	1053.18	1041.43	1063.99
377	Line 21 19CJ09-28065_area20C-line1	19CJ09-28065	20C	SLV	SLVt	45.84	23.39	0.279	0.186	9.33	11.29	7.3	0	1.343	98.964	1.75492	0.959321	0.0207073	0.00603064	0.298715	0.644363	0.329355	0	0.0386753	4.05208	0.683255	3.62053	3.24425	3.9603	1057.95	1047.11	1068.71
378	Line 22 19CJ09-28065_area20C-line1	19CJ09-28065	20C	SLV	SLVt	45.46	23.4	0.285	0.182	9.33	11.17	7.38	0	1.385	98.628	1.74841	0.964168	0.0212504	0.00592823	0.300096	0.640461	0.334504	0	0.0400692	4.05489	0.680938	3.53826	3.13283	3.90355	1058.38	1046.62	1069.97
379	Line 23 19CJ09-28065_area20C-line1	19CJ09-28065	20C	SLV	SLVt	45.91	23.48	0.31	0.151	9.38	11.3	7.4	0	1.357	99.299	1.7521	0.960002	0.0229362	0.00488054	0.299377	0.642918	0.332824	0	0.0389564	4.054	0.682289	3.65124	3.23616	4.00514	1062.11	1050.87	1072.15
380	Line 24 19CJ09-28065_area20C-line1	19CJ09-28065	20C	SLV	SLVt	45.5	23.36	0.327	0.167	9.22	11.27	7.34	0	1.369	98.573	1.74964	0.96235	0.0243778	0.00543868	0.296506	0.646081	0.332632	0	0.0395993	4.05663	0.685434	3.58699	3.21531	3.93904	1060.83	1050.63	1071.1
381	Line 25 19CJ09-28065_area20C-line1	19CJ09-28065	20C	SLV	SLVt	45.74	23.4	0.287	0.186	9.24	11.25	7.41	0	1.38	98.918	1.75183	0.960137	0.0213101	0.00603319	0.295959	0.642352	0.33446	0	0.0397577	4.05184	0.684583	3.60322	3.2001	3.95231	1062.4	1050.27	1073.85
382	Line 26 19CJ09-28065_area20C-line1	19CJ09-28065	20C	SLV	SLVt	45.94	23.39	0.316	0.173	9.35	11.44	7.36	0	1.369	99.349	1.75192	0.955599	0.0233625	0.00558738	0.298194	0.650391	0.330774	0	0.0392711	4.0551	0.685643	3.66029	3.27007	3.97405	1063.87	1051.92	1073.05
383	Line 27 19CJ09-28065_area20C-line1	19CJ09-28065	20C	SLV	SLVt	45.79	23.31	0.318	0.16	9.43	11.42	7.42	0	1.38	99.251	1.74881	0.953756	0.0235455	0.00517526	0.301195	0.650226	0.33397	0	0.0396459	4.05633	0.683426	3.67538	3.27404	3.99605	1064.91	1053.44	1074.14
384	Line 28 19CJ09-28065_area20C-line1	19CJ09-28065	20C	SLV	SLVt	45.4	23.3	0.334	0.192	9.64	11.09	7.55	0	1.509	99.015	1.74102	0.95725	0.0248315	0.00623573	0.309163	0.634021	0.341212	0	0.0435294	4.05726	0.672213	2.99162	2.64381	3.406	1057.72	1045.72	1070.37
385	Line 29 19CJ09-28065_area20C-line1	19CJ09-28065	20C	SLV	SLVt	45.45	23.28	0.27	0.184	9.55	11.18	7.62	0	1.449	98.991	1.7418	0.955804	0.0200602	0.00597201	0.306077	0.63875	0.344151	0	0.0417714	4.05438	0.676049	3.37712	3.00182	3.76232	1061.51	1049.7	1072.7
386	Line 30 19CJ09-28065_area20C-line1	19CJ09-28065	20C	SLV	SLVt	45.66	23.38	0.305	0.15	9.5	11.15	7.41	0	1.412	98.968	1.74964	0.959794	0.0226579	0.0048679	0.304438	0.636959	0.334626	0	0.0406998	4.05368	0.67661	3.40933	3.03424	3.7904	1057.86	1046.81	1067.1
387	Line 1 19CJ09-28065_area21A-line1	19CJ09-28065	21A	SLV	SLVt	46.73	24.1	0.222	0.086	7.26	12.61	6.9	0.019	1.262	99.233	1.76833	0.977027	0.0162865	0.00275616	0.229756	0.711389	0.307714	0.000568416	0.035923	4.04975	0.755876	2.54728	2.24187	2.91368	1064.5	1057.83	1071.91
388	Line 2 19CJ09-28065_area21A-line1	19CJ09-28065	21A	SLV	SLVt	48	24.24	0.212	0.109	6.61	13.53	5.73	0.08	0.991	99.523	1.8036	0.975784	0.0154434	0.00346868	0.207713	0.757918	0.253737	0.00237648	0.0280104	4.04805	0.784894	2.36049	2.24182	2.49674	1047.04	1042.81	1052
389	Line 3 19CJ09-28065_area21A-line1	19CJ09-28065	21A	SLV	SLVt	42	23.79	0.298	0.174	12.04	9.08	9.41	0.022	1.71	98.544	1.64962	1.00104	0.0226914	0.00578794	0.395481	0.531675	0.435568	0.00068313	0.0505217	4.09307	0.573447	2.25837	2.08811	2.44764	996.383	989.864	1006.6
390	Line 4 19CJ09-28065_area21A-line1	19CJ09-28065	21A	SLV	SLVt	41.98	23.79	0.298	0.17	12.28	9.05	9.44	0	1.661	98.687	1.64813	1.00061	0.0226816	0.00565244	0.403191	0.52969	0.436768	0	0.0490529	4.09578	0.5678	2.44675	2.29871	2.6511	964.24	958.442	974.131
391	Line 5 19CJ09-28065_area21A-line1	19CJ09-28065	21A	SLV	SLVt	42.02	23.79	0.33	0.155	12.33	8.99	9.48	0	1.651	98.746	1.64855	0.999915	0.0250997	0.00515012	0.404551	0.525813	0.438314	0	0.0487237	4.09612	0.565169	2.33311	2.15936	2.56763	961.931	956.441	970.849
392	Line 6 19CJ09-28065_area21A-line1	19CJ09-28065	21A	SLV	SLVt	41.87	23.74	0.307	0.219	12.49	8.95	9.54	0	1.68	98.802	1.64372	0.998452	0.0233653	0.00728127	0.410063	0.523808	0.44137	0	0.0496112	4.09767	0.5609	2.30383	2.14082	2.52146	964.023	957.887	972.839
393	Line 7 19CJ09-28065_area21A-line1	19CJ09-28065	21A	SLV	SLVt	41.92	23.77	0.345	0.174	12.4	9.01	9.43	0	1.67	98.719	1.64638	1.00014	0.0262685	0.00578756	0.40728	0.527542	0.436465	0	0.0493367	4.09919	0.564324	2.26823	2.0842	2.47297	962.849	957.657	973.368
394	Line 8 19CJ09-28065_area21A-line1	19CJ09-28065	21A	SLV	SLVt	42.08	23.78	0.319	0.232	12.28	8.94	9.32	0	1.67	98.647	1.65314	1.00085	0.0242959	0.007719	0.403456	0.523596	0.431499	0	0.0493511	4.09391	0.564797	2.22889	2.05152	2.4628	961.876	953.435	970.788
395	Line 9 19CJ09-28065_area21A-line1	19CJ09-28065	21A	SLV	SLVt	42.21	23.76	0.349	0.158	12.44	8.98	9.31	0	1.7	98.907	1.65364	0.997225	0.0265069	0.00524229	0.407576	0.524477	0.429838	0	0.050098	4.0946	0.562711	2.20817	2.03032	2.41349	960.813	955.969	968.268
396	Line 10 19CJ09-28065_area21A-line1	19CJ09-28065	21A	SLV	SLVt	41.78	23.66	0.275	0.201	13.04	8.44	9.51	0	1.603	98.509	1.64861	1.0002	0.0210373	0.00671714	0.43032	0.496498	0.442243	0	0.0475806	4.09321	0.535702	2.36082	2.22273	2.53364	947.572	939.826	954.788
397	Line 11 19CJ09-28065_area21A-line1	19CJ09-28065	21A	SLV	SLVt	41.74	23.71	0.338	0.21	13.14	8.36	9.61	0	1.59	98.703	1.64526	1.00123	0.025829	0.00701036	0.433153	0.491262	0.446412	0	0.0471439	4.0973	0.53143	2.13146	1.96372	2.35362	943.463	937.301	951.605
398	Line 12 19CJ09-28065_area21A-line1	19CJ09-28065	21A	SLV	SLVt	41.65	23.75	0.283	0.211	13.11	8.52	9.61	0	1.595	98.738	1.64137	1.00272	0.0216216	0.00704229	0.432075	0.500561	0.44632	0	0.0472824	4.09899	0.536717	2.35699	2.19273	2.51842	951.358	942.349	957.834
399	Line 13 19CJ09-28065_area21A-line1	19CJ09-28065	21A	SLV	SLVt	41.55	23.65	0.298	0.206	13.19	8.46	9.68	0	1.62	98.675	1.63914	0.999532	0.0227913	0.00688256	0.435163	0.497553	0.450038	0	0.0480734	4.09917	0.533445	2.29685	2.1357	2.47668	950.069	941.39	956.585
400	Line 14 19CJ09-28065_area21A-line1	19CJ09-28065	21A	SLV	SLVt	41.4	23.65	0.288	0.201	13.09	8.43	9.74	0.031	1.635	98.464	1.6362	1.00136	0.0220666	0.00672775	0.432652	0.496692	0.453653	0.000968594	0.048607	4.09892	0.534455	2.2024	2.02819	2.39896	990.383	983.804	995.981
401	Line 15 19CJ09-28065_area21A-line1	19CJ09-28065	21A	SLV	SLVt	41.43	23.69	0.307	0.17	13.19	8.29	9.88	0	1.599	98.568	1.63602	1.00221	0.0235028	0.0056854	0.435594	0.488037	0.459791	0	0.0474972	4.09834	0.52839	2.33735	2.17426	2.51931	940.117	934.431	948.962
402	Line 16 19CJ09-28065_area21A-line1	19CJ09-28065	21A	SLV	SLVt	41.41	23.8	0.357	0.19	13.27	8.26	9.81	0	1.542	98.646	1.6357	1.00716	0.0273386	0.00635611	0.438363	0.486412	0.456666	0	0.0458173	4.10382	0.525979	2.18902	2.0325	2.45663	940.923	935.824	949.133
403	Line 17 19CJ09-28065_area21A-line1	19CJ09-28065	21A	SLV	SLVt	41.73	23.83	0.353	0.236	13.17	8.4	9.71	0	1.542	98.976	1.64126	1.0041	0.0269161	0.00786104	0.43319	0.492531	0.450068	0	0.0456205	4.10154	0.532051	2.12735	1.97387	2.35641	940.195	931.38	949.493
404	Line 18 19CJ09-28065_area21A-line1	19CJ09-28065	21A	SLV	SLVt	41.79	23.75	0.29	0.241	13.12	8.34	9.74	0.022	1.547	98.852	1.64434	1.00117	0.0221221	0.00803112	0.431736	0.489228	0.451658	0.000684365	0.0457886	4.09476	0.531213	2.1959	2.02415	2.40684	972.826	962.545	981.522
405	Line 20 19CJ09-28065_area21A-line1	19CJ09-28065	21A	SLV	SLVt	41.39	23.63	0.314	0.201	13.19	8.2	9.98	0	1.54	98.459	1.63613	1.00071	0.0240636	0.00672912	0.436046	0.483239	0.464926	0	0.0457921	4.09764	0.525669	2.33848	2.16313	2.63399	941.507	936.622	948.424
406	Line 21 19CJ09-28065_area21A-line1	19CJ09-28065	21A	SLV	SLVt	41.31	23.73	0.313	0.2	13.24	8.08	9.96	0	1.534	98.379	1.63552	1.00651	0.0240244	0.00670608	0.438381	0.476909	0.464718	0	0.0456848	4.09845	0.521047	2.35258	2.18111	2.62085	939.526	934.949	945.314
407	Line 22 19CJ09-28065_area21A-line1	19CJ09-28065	21A	SLV	SLVt	41.36	23.63	0.382	0.235	13.33	8.12	10.04	0	1.509	98.607	1.63396	1.00011	0.0292572	0.00786262	0.440407	0.478235	0.467438	0	0.0448431	4.10211	0.520589	2.13502	1.97443	2.45542	936.81	929.096	943.606
408	Line 23 19CJ09-28065_area21A-line1	19CJ09-28065	21A	SLV	SLVt	41.34	23.79	0.261	0.185	13.17	8.18	9.92	0	1.597	98.446	1.63481	1.00789	0.0200099	0.00619593	0.435558	0.482252	0.462315	0	0.0475059	4.09653	0.525438	2.45604	2.33652	2.64446	940.447	935.377	947.942
409	Line 24 19CJ09-28065_area21A-line1	19CJ09-28065	21A	SLV	SLVt	42.14	23.82	0.335	0.174	12.18	8.85	9.39	0	1.654	98.549	1.65538	1.00246	0.0255127	0.00578883	0.400141	0.518287	0.434709	0	0.0488747	4.09115	0.56432	2.23967	2.06698	2.44214	960.863	955.402	968.295
410	Line 1 19CJ09-28065_area22A-line1	19CJ09-28065	22A	SLV	SLVt	43.69	23.36	0.438	0.262	11.21	9.33	8.49	0	1.529	98.309	1.70614	0.977296	0.03316	0.00866506	0.366101	0.543173	0.390723	0	0.0449144	4.07017	0.59737	2.35315	2.02416	2.77271	958.165	938.705	977.179
411	Line 2 19CJ09-28065_area22A-line1	19CJ09-28065	22A	SLV	SLVt	43.81	23.31	0.498	0.214	11.36	9.46	8.45	0	1.503	98.622	1.70623	0.972588	0.0376013	0.00705858	0.370004	0.549263	0.387839	0	0.0440321	4.07462	0.597501	2.57078	2.24859	2.95113	975.388	962.555	989.305
412	Line 3 19CJ09-28065_area22A-line1	19CJ09-28065	22A	SLV	SLVt	43.75	23.32	0.48	0.23	11.36	9.38	8.56	0	1.534	98.627	1.7038	0.972951	0.0362401	0.0075859	0.369983	0.544588	0.392866	0	0.0449378	4.07295	0.595457	2.46577	2.15887	2.88173	973.271	961.174	987.947
413	Line 5 19CJ09-28065_area22A-line1	19CJ09-28065	22A	SLV	SLVt	44.44	23.31	0.5	0.219	10.68	10	8.24	0	1.461	98.855	1.71885	0.965891	0.0374923	0.00717376	0.345461	0.576619	0.375596	0	0.042507	4.06959	0.625346	2.90864	2.5772	3.36891	1002.66	985.562	1022.05
414	Line 6 19CJ09-28065_area22A-line1	19CJ09-28065	22A	SLV	SLVt	44.64	23.18	0.459	0.205	10.66	9.96	8.36	0	1.479	98.969	1.72246	0.958207	0.0343356	0.0066991	0.343989	0.572939	0.380155	0	0.0429278	4.06171	0.624846	2.8809	2.50756	3.32958	1005.72	989.638	1023.77
415	Line 7 19CJ09-28065_area22A-line1	19CJ09-28065	22A	SLV	SLVt	44.47	23.33	0.48	0.208	10.6	9.87	8.31	0	1.462	98.73	1.72093	0.967236	0.0360118	0.00681707	0.343056	0.569427	0.378989	0	0.0425588	4.06502	0.624041	2.87673	2.53009	3.30502	1000.34	985.326	1016.62
416	Line 8 19CJ09-28065_area22A-line1	19CJ09-28065	22A	SLV	SLVt	44.53	23.29	0.441	0.255	10.63	10.03	8.29	0	1.434	98.913	1.72031	0.963928	0.0330294	0.00834319	0.343439	0.577669	0.377431	0	0.0416724	4.06582	0.627146	2.96073	2.57642	3.45208	993.499	970.447	1015.25
417	Line 9 19CJ09-28065_area22A-line1	19CJ09-28065	22A	SLV	SLVt	44.73	23.33	0.495	0.26	10.57	10.02	8.19	0	1.463	99.058	1.72469	0.963715	0.037002	0.00849032	0.34084	0.575976	0.372157	0	0.0424329	4.0653	0.628235	2.97007	2.55784	3.45485	988.452	964.313	1009.97
418	Line 10 19CJ09-28065_area22A-line1	19CJ09-28065	22A	SLV	SLVt	44.52	23.32	0.457	0.185	10.59	9.94	8.33	0	1.47	98.819	1.72074	0.965632	0.0342441	0.0060558	0.342311	0.57276	0.379434	0	0.0427391	4.06392	0.625919	2.83407	2.49408	3.24425	1003.01	989.762	1022.27
419	Line 11 19CJ09-28065_area22A-line1	19CJ09-28065	22A	SLV	SLVt	44.42	23.29	0.503	0.214	10.58	10.06	8.17	0	1.464	98.702	1.72003	0.96616	0.0377602	0.00701795	0.342615	0.580738	0.372829	0	0.0426427	4.06979	0.628945	2.89205	2.54917	3.32611	1005.01	989.182	1024.2
420	Line 12 19CJ09-28065_area22A-line1	19CJ09-28065	22A	SLV	SLVt	44.33	23.24	0.424	0.301	10.79	10.08	8	0	1.522	98.691	1.71926	0.965608	0.0318799	0.00988662	0.349968	0.582811	0.365648	0	0.0444021	4.06946	0.624812	2.51197	2.14806	2.92012	951.714	936.505	973.824
421	Line 13 19CJ09-28065_area22A-line1	19CJ09-28065	22A	SLV	SLVt	44	23.05	0.47	0.317	11.4	9.73	7.97	0	1.659	98.607	1.71381	0.961841	0.0354909	0.010457	0.371346	0.565	0.365847	0	0.0486075	4.0724	0.603409	1.95296	1.70004	2.3255	918.321	902.457	933.825
422	Line 14 19CJ09-28065_area22A-line1	19CJ09-28065	22A	SLV	SLVt	43.85	23.19	0.464	0.306	11.24	9.76	7.95	0	1.658	98.433	1.7112	0.969515	0.0351041	0.0101133	0.366828	0.567815	0.365619	0	0.0486702	4.07487	0.607521	1.9942	1.73212	2.34498	930.471	914.96	946.899
423	Line 15 19CJ09-28065_area22A-line1	19CJ09-28065	22A	SLV	SLVt	44.48	23.25	0.452	0.29	10.81	10.1	7.82	0	1.561	98.775	1.72379	0.965302	0.0339598	0.00951821	0.350355	0.583532	0.357154	0	0.0455059	4.06911	0.624843	2.25317	1.95347	2.66369	958.656	940.25	981.046
424	Line 16 19CJ09-28065_area22A-line1	19CJ09-28065	22A	SLV	SLVt	44.55	23.23	0.52	0.308	10.82	10.26	7.46	0	1.536	98.7	1.72904	0.96589	0.0391263	0.0101239	0.351194	0.593648	0.341213	0	0.0448429	4.07508	0.628304	2.22782	1.94705	2.67441	935.895	920.27	956.845
425	Line 17 19CJ09-28065_area22A-line1	19CJ09-28065	22A	SLV	SLVt	44.33	23.18	0.468	0.299	10.86	10.1	7.66	0.03	1.552	98.48	1.72433	0.965958	0.035292	0.00984992	0.353278	0.585692	0.351141	0.000922548	0.045411	4.07187	0.62376	2.1386	1.87835	2.48267	973.946	959.343	992.555
426	Line 18 19CJ09-28065_area22A-line1	19CJ09-28065	22A	SLV	SLVt	44.79	23.27	0.462	0.321	10.89	10.22	7.41	0	1.539	98.902	1.73395	0.965102	0.0346741	0.0105244	0.352571	0.589835	0.338067	0	0.0448167	4.06954	0.625882	2.00306	1.77239	2.29838	924.202	908.725	942.043
427	Line 19 19CJ09-28065_area22A-line1	19CJ09-28065	22A	SLV	SLVt	44.22	23.14	0.53	0.331	11.06	9.92	7.46	0	1.627	98.3	1.72624	0.96776	0.0401113	0.0109433	0.361078	0.577323	0.343203	0	0.0477767	4.07444	0.61522	1.90682	1.64805	2.26696	907.56	893.277	925.243
428	Line 20 19CJ09-28065_area22A-line1	19CJ09-28065	22A	SLV	SLVt	44.61	23.15	0.486	0.37	11.12	9.91	7.45	0.024	1.69	98.81	1.73108	0.962406	0.036562	0.0121598	0.360872	0.573302	0.3407	0.000736277	0.0493308	4.06715	0.613699	1.60468	1.4637	1.8377	911.618	896.894	927.279
429	Line 21 19CJ09-28065_area22A-line1	19CJ09-28065	22A	SLV	SLVt	44.68	23.15	0.492	0.338	11.23	9.9	7.35	0	1.637	98.785	1.7348	0.962961	0.0370347	0.0111145	0.364652	0.573054	0.33632	0	0.0478113	4.06775	0.611123	1.71412	1.5502	1.96775	897.926	883.715	914.634
430	Line 22 19CJ09-28065_area22A-line1	19CJ09-28065	22A	SLV	SLVt	43.88	23.23	0.571	0.329	11.26	9.77	7.8	0	1.69	98.538	1.71192	0.970931	0.0431879	0.0108706	0.367383	0.568246	0.358626	0	0.0495964	4.08076	0.607341	2.16449	1.81902	2.59637	907.985	891.726	925.582
431	Line 23 19CJ09-28065_area22A-line1	19CJ09-28065	22A	SLV	SLVt	44.41	23.25	0.493	0.326	10.92	9.96	7.4	0	1.556	98.33	1.73155	0.971177	0.0372656	0.0107649	0.356073	0.578945	0.340028	0	0.0456362	4.07144	0.61918	1.85687	1.64739	2.17427	911.081	898.444	927.388
432	Line 24 19CJ09-28065_area22A-line1	19CJ09-28065	22A	SLV	SLVt	44.21	23.2	0.5	0.345	10.94	10.1	7.59	0	1.599	98.499	1.72156	0.96786	0.0377469	0.0113779	0.356273	0.586339	0.348317	0	0.0468379	4.07631	0.622036	1.93706	1.66363	2.29271	907.867	894.994	925.416
433	Line 25 19CJ09-28065_area22A-line1	19CJ09-28065	22B	SLV	SLVt	44.17	23.24	0.468	0.309	10.96	10.11	7.65	0	1.609	98.516	1.7194	0.969188	0.0353187	0.010187	0.356799	0.586713	0.350947	0	0.0471143	4.07567	0.621839	2.01803	1.77215	2.35485	937.319	919.99	955.89
434	Line 1 19CJ09-28065_area22B-line1	19CJ09-28065	22B	SLV	SLVt	41.76	23.48	0.299	0.148	12.16	8.61	10.44	0	2.01	98.907	1.63152	0.98277	0.022647	0.00489703	0.39731	0.501487	0.480687	0	0.059071	4.08039	0.557954	2.37986	2.1697	2.89804	964.998	956.485	973.467
435	Line 2 19CJ09-28065_area22B-line1	19CJ09-28065	22B	SLV	SLVt	41.83	23.56	0.319	0.158	11.91	8.78	10.13	0	1.93	98.617	1.63821	0.988503	0.0242203	0.00524055	0.390082	0.512625	0.467542	0	0.056857	4.08328	0.567875	2.24405	2.07673	2.41301	969.863	961.887	977.529
436	Line 3 19CJ09-28065_area22B-line1	19CJ09-28065	22B	SLV	SLVt	41.88	23.61	0.276	0.188	11.7	8.88	10.07	0	1.92	98.526	1.64028	0.990668	0.0209569	0.00623601	0.38323	0.518499	0.464804	0	0.0565663	4.08123	0.575005	2.36972	2.23219	2.4878	975.789	967.708	985.517
437	Line 4 19CJ09-28065_area22B-line1	19CJ09-28065	22B	SLV	SLVt	42.06	23.69	0.218	0.185	11.69	8.92	10.02	0	1.86	98.644	1.64454	0.992343	0.0165249	0.00612612	0.382255	0.519954	0.461714	0	0.0547059	4.07816	0.576312	2.45437	2.353	2.55923	976.154	967.855	986.523
438	Line 5 19CJ09-28065_area22B-line1	19CJ09-28065	22B	SLV	SLVt	41.87	23.64	0.322	0.182	11.88	8.75	10.16	0	1.94	98.744	1.63777	0.990649	0.0244183	0.00602921	0.388625	0.51025	0.468354	0	0.0570819	4.08318	0.567654	2.19215	2.03073	2.37768	972.205	963.287	980.748
439	Line 6 19CJ09-28065_area22B-line1	19CJ09-28065	22B	SLV	SLVt	41.71	23.74	0.321	0.145	11.76	8.71	10.21	0	1.93	98.545	1.63505	0.996996	0.0243952	0.00481391	0.385533	0.509019	0.471679	0	0.0569108	4.0844	0.569021	2.23421	2.07483	2.44833	969.511	960.608	978.506
440	Line 8 19CJ09-28065_area22B-line1	19CJ09-28065	22B	SLV	SLVt	42.44	23.7	0.297	0.176	11.29	9.24	9.75	0	1.79	98.683	1.65509	0.990183	0.0224549	0.00581295	0.368216	0.537208	0.448105	0	0.0525103	4.07958	0.593322	2.47258	2.31308	2.64577	987.766	977.132	999.74
441	Line 9 19CJ09-28065_area22B-line1	19CJ09-28065	22B	SLV	SLVt	42.27	23.68	0.227	0.158	11.35	9.05	9.98	0	1.82	98.536	1.65088	0.990803	0.0171877	0.00522612	0.370717	0.526935	0.45935	0	0.0534689	4.07457	0.587014	2.53483	2.43799	2.65911	982.619	973.763	993.445
442	Line 10 19CJ09-28065_area22B-line1	19CJ09-28065	22B	SLV	SLVt	42.65	23.8	0.34	0.18	11.12	9.36	9.71	0.033	1.74	98.936	1.65787	0.991127	0.0256223	0.00592573	0.361492	0.542414	0.444815	0.00101412	0.0508775	4.08115	0.600078	2.17575	1.91463	2.41355	1027.68	1016.5	1036.84
443	Line 11 19CJ09-28065_area22B-line1	19CJ09-28065	22B	SLV	SLVt	42.67	23.79	0.244	0.179	11.1	9.27	9.61	0	1.73	98.62	1.66345	0.993584	0.0184411	0.0059099	0.361889	0.538757	0.441511	0	0.0507318	4.07428	0.59819	2.61522	2.46415	2.78681	990.531	979.282	1003.36
444	Line 12 19CJ09-28065_area22B-line1	19CJ09-28065	22B	SLV	SLVt	42.15	23.68	0.336	0.148	11.38	9.1	9.92	0.022	1.84	98.598	1.64719	0.991403	0.0254562	0.00489832	0.371923	0.530167	0.456866	0.000679695	0.0540892	4.08267	0.58771	2.10738	1.93135	2.29514	1006.11	998.755	1015.64
445	Line 13 19CJ09-28065_area22B-line1	19CJ09-28065	22B	SLV	SLVt	42.25	23.77	0.312	0.167	11.52	9.05	9.59	0	1.8	98.459	1.65474	0.997366	0.0236901	0.00553935	0.377328	0.528417	0.442641	0	0.0530301	4.08275	0.583406	2.33118	2.17278	2.50502	976.546	967.126	987.097
446	Line 14 19CJ09-28065_area22B-line1	19CJ09-28065	22B	SLV	SLVt	45.39	23.9	0.296	0.162	10.1	10.57	7.27	0	1.232	98.957	1.74893	0.986577	0.0221111	0.00528646	0.325459	0.607171	0.330123	0	0.0357082	4.06136	0.651031	3.40249	3.07214	3.76545	1024.58	1005.35	1036.49
447	Line 15 19CJ09-28065_area22B-line1	19CJ09-28065	22B	SLV	SLVt	45.38	23.87	0.268	0.176	9.97	10.62	7.2	0	1.189	98.686	1.7518	0.987177	0.0200569	0.00575403	0.321869	0.611181	0.327554	0	0.0345262	4.05992	0.655036	3.48825	3.13706	3.80765	1023.84	1007.47	1037.01
448	Line 16 19CJ09-28065_area22B-line1	19CJ09-28065	22B	SLV	SLVt	45.42	23.98	0.261	0.161	10.04	10.59	7.17	0	1.194	98.823	1.75169	0.990791	0.0195146	0.00525867	0.323824	0.60888	0.325882	0	0.0346387	4.06048	0.652812	3.43644	3.0969	3.73637	1024.32	1006.97	1035.48
449	Line 17 19CJ09-28065_area22B-line1	19CJ09-28065	22B	SLV	SLVt	45.43	23.96	0.283	0.164	9.9	10.74	7.08	0	1.175	98.738	1.75274	0.990339	0.0211675	0.00535868	0.319429	0.617738	0.321913	0	0.0341004	4.06279	0.659155	3.4482	3.07211	3.76301	1028.03	1013.26	1040.04
450	Line 18 19CJ09-28065_area22B-line1	19CJ09-28065	22B	SLV	SLVt	45.87	23.91	0.278	0.152	9.85	10.72	7.07	0	1.159	99.011	1.76181	0.983856	0.0207006	0.00494439	0.316395	0.613832	0.320022	0	0.0334857	4.05504	0.659873	3.46875	3.11505	3.85871	1029.27	1014.41	1040.54
451	Line 19 19CJ09-28065_area22B-line1	19CJ09-28065	22B	SLV	SLVt	45.71	23.95	0.32	0.169	9.8	10.76	6.95	0	1.16	98.849	1.76034	0.988126	0.0238915	0.00551201	0.315627	0.617763	0.315428	0	0.0336039	4.06029	0.661849	3.28936	2.95631	3.65084	1027.9	1013.45	1039.69
452	Line 20 19CJ09-28065_area22B-line1	19CJ09-28065	22B	SLV	SLVt	45.79	23.86	0.318	0.147	9.69	10.98	6.93	0.025	1.136	98.886	1.76074	0.982916	0.0237061	0.00478719	0.31161	0.629436	0.314042	0.000759992	0.0328586	4.06085	0.668868	3.59462	3.23504	3.95758	1053.38	1043.29	1063.23
453	Line 22 19CJ09-28065_area22B-line1	19CJ09-28065	22B	SLV	SLVt	43.07	23.7	0.248	0.176	10.82	9.49	9.41	0	1.66	98.586	1.67535	0.987644	0.0187021	0.00579805	0.351983	0.550328	0.43137	0	0.0485719	4.06975	0.60991	2.79772	2.61937	2.95978	1002.24	988.627	1015.51
454	Line 23 19CJ09-28065_area22B-line1	19CJ09-28065	22B	SLV	SLVt	42.77	23.61	0.269	0.152	11.05	9.27	9.56	0	1.71	98.391	1.669	0.98704	0.0203506	0.00502341	0.360614	0.539289	0.439648	0	0.0501948	4.07116	0.599274	2.64405	2.48436	2.83001	988.731	977.074	1001.59
455	Line 24 19CJ09-28065_area22B-line1	19CJ09-28065	22B	SLV	SLVt	43.08	23.71	0.273	0.164	10.87	9.46	9.48	0.049	1.655	98.748	1.67339	0.986678	0.0205586	0.00539516	0.353114	0.54782	0.433971	0.00150475	0.0483578	4.07079	0.608058	2.45468	2.23595	2.71989	1041.11	1030.66	1049.59
456	Line 25 19CJ09-28065_area22B-line1	19CJ09-28065	22B	SLV	SLVt	42.9	23.79	0.249	0.181	10.94	9.38	9.42	0	1.626	98.504	1.67237	0.993556	0.0188184	0.00597576	0.356662	0.545134	0.43277	0	0.0476807	4.07297	0.604498	2.77514	2.59885	2.95593	996.521	982.965	1008.79
457	Line 26 19CJ09-28065_area22B-line1	19CJ09-28065	22B	SLV	SLVt	42.96	23.6	0.36	0.189	11.07	9.35	9.33	0	1.72	98.589	1.67387	0.985127	0.0271938	0.00623676	0.360719	0.543119	0.42842	0	0.0504119	4.0751	0.600903	2.39536	2.15585	2.62828	992.083	979.008	1005.18
458	Line 28 19CJ09-28065_area22B-line1	19CJ09-28065	22B	SLV	SLVt	42.81	23.79	0.293	0.186	11.11	9.19	9.61	0	1.68	98.681	1.66732	0.992634	0.0221232	0.00613514	0.361868	0.533597	0.441089	0	0.0492185	4.07398	0.595888	2.57898	2.39199	2.78835	987.121	976.703	1000.19
459	Line 29 19CJ09-28065_area22B-line1	19CJ09-28065	22B	SLV	SLVt	42.37	23.61	0.293	0.177	11.25	9.12	9.68	0.021	1.73	98.251	1.65927	0.99055	0.0222451	0.00587044	0.368447	0.532449	0.446749	0.000650163	0.0509625	4.07719	0.591022	2.29851	2.13825	2.49536	1006.48	998.254	1017.29
460	Line 30 19CJ09-28065_area22B-line1	19CJ09-28065	22B	SLV	SLVt	42.15	23.65	0.29	0.188	11.19	9.02	9.73	0	1.77	98.003	1.65569	0.995257	0.0220846	0.0062543	0.3676	0.528219	0.450428	0	0.0523	4.07784	0.589649	2.43066	2.28694	2.58758	981.649	973.387	991.904
461	Line 2 19CJ09-28065_area18B-line1	19CJ09-28065	18B	SLV	SLVt	43.22	22.82	0.502	0.235	11.29	9.45	8.86	0	1.94	98.318	1.68736	0.954463	0.0379956	0.00777013	0.36862	0.55002	0.407648	0	0.0569731	4.07085	0.598733	2.05398	1.73944	2.47673	982.274	966.35	996.793
462	Line 3 19CJ09-28065_area18B-line1	19CJ09-28065	18B	SLV	SLVt	43.5	22.87	0.498	0.267	11.37	9.48	8.73	0.028	1.94	98.684	1.69221	0.953132	0.037558	0.00879661	0.369904	0.549792	0.40023	0.000861129	0.0567692	4.06925	0.597797	1.79879	1.54176	2.12048	993.47	976.326	1010.95
463	Line 4 19CJ09-28065_area18B-line1	19CJ09-28065	18B	SLV	SLVt	43.52	22.96	0.464	0.229	11.32	9.53	8.55	0	1.89	98.463	1.69654	0.958889	0.0350672	0.00756047	0.369049	0.55385	0.392799	0	0.055422	4.06917	0.60012	1.83435	1.54062	2.21803	984.211	969.702	999.202
464	Line 5 19CJ09-28065_area18B-line1	19CJ09-28065	18B	SLV	SLVt	43.86	23	0.43	0.256	11.35	9.48	8.43	0.023	1.81	98.652	1.70582	0.95833	0.0324222	0.00843226	0.369169	0.549665	0.386387	0.000707193	0.0529529	4.06389	0.598221	1.81268	1.51675	2.12202	993.32	975.051	1009.16
465	Line 6 19CJ09-28065_area18B-line1	19CJ09-28065	18B	SLV	SLVt	43.53	22.95	0.434	0.241	11.39	9.28	8.53	0	1.91	98.274	1.70056	0.960525	0.0328702	0.0079737	0.372127	0.540477	0.39272	0	0.0561285	4.06338	0.592236	1.68903	1.43934	2.0244	970.289	955.934	985.671
466	Line 7 19CJ09-28065_area18B-line1	19CJ09-28065	18B	SLV	SLVt	44.77	23.08	0.556	0.23	11.07	9.85	7.82	0	1.631	99.015	1.73058	0.955788	0.0416665	0.00752957	0.357861	0.567629	0.356238	0	0.0474246	4.06471	0.613328	2.57919	2.20864	3.08361	978.468	961.67	996.735
467	Line 8 19CJ09-28065_area18B-line1	19CJ09-28065	18B	SLV	SLVt	44.26	23.03	0.507	0.258	11.07	9.85	7.81	0	1.632	98.43	1.72322	0.960608	0.038269	0.00850724	0.360447	0.571731	0.358353	0	0.0477966	4.06894	0.613328	2.16463	1.85995	2.60895	966.739	947.161	987.869
468	Line 9 19CJ09-28065_area18B-line1	19CJ09-28065	18B	SLV	SLVt	44.35	23	0.473	0.245	10.9	9.97	8.03	0	1.68	98.669	1.72001	0.955625	0.0355637	0.00804716	0.353531	0.576445	0.367015	0	0.049011	4.06525	0.619849	2.22214	1.88359	2.59547	991.125	971.762	1011.63
469	Line 10 19CJ09-28065_area18B-line1	19CJ09-28065	16A	SLV	SLVt	44.22	22.94	0.539	0.285	11.09	9.8	8.02	0	1.68	98.592	1.71873	0.955223	0.040615	0.00938152	0.360483	0.567859	0.367362	0	0.0491185	4.06878	0.611692	2.42581	2.04301	2.92746	950.789	933.495	971.392
470	Line 31 19CJ09-28065_area16A-line1	19CJ09-28065	16A	SLV	SLVt	46.39	23.62	0.355	0.177	9.34	11.69	6.5	0.034	1.323	99.44	1.76905	0.964979	0.0262454	0.00571647	0.29787	0.664592	0.292119	0.00102504	0.0379509	4.05955	0.690513	2.8313	2.57579	3.17217	1064.99	1058.67	1070.57
471	Line 30 19CJ09-28065_area16A-line1	19CJ09-28065	16A	SLV	SLVt	46.08	23.39	0.296	0.194	9.35	10.97	6.47	0	1.349	98.145	1.78018	0.968063	0.0221693	0.00634734	0.302083	0.631805	0.294568	0	0.0392021	4.04442	0.676532	2.45173	2.20547	2.7292	1028.33	1018.25	1038.01
472	Line 29 19CJ09-28065_area16A-line1	19CJ09-28065	16A	SLV	SLVt	46.18	23.4	0.321	0.214	9.41	11.02	6.43	0	1.408	98.399	1.77952	0.966022	0.0239807	0.00698396	0.303251	0.633076	0.292005	0	0.040813	4.04565	0.676127	2.28451	2.05686	2.56626	1028.57	1017.97	1038.15
473	Line 28 19CJ09-28065_area16A-line1	19CJ09-28065	16A	SLV	SLVt	46.17	23.31	0.363	0.242	9.61	11.02	6.05	0.022	1.403	98.191	1.7853	0.965643	0.0272124	0.00792513	0.31077	0.635271	0.275701	0.000672543	0.040809	4.04931	0.671504	2.01876	1.82486	2.24392	1034.1	1018.45	1044.14
474	Line 27 19CJ09-28065_area16A-line1	19CJ09-28065	16A	SLV	SLVt	45.9	23.24	0.337	0.26	9.99	10.81	6.47	0.021	1.535	98.562	1.77121	0.960764	0.0252114	0.0084971	0.322395	0.621884	0.294234	0.000640653	0.0445567	4.0494	0.658581	1.86916	1.68003	2.11548	1018.32	995.798	1037.71
475	Line 26 19CJ09-28065_area16A-line1	19CJ09-28065	16A	SLV	SLVt	45.52	23.26	0.394	0.229	9.94	10.49	6.83	0	1.536	98.201	1.76353	0.965412	0.0295928	0.00751372	0.322056	0.605873	0.31184	0	0.0447629	4.05058	0.65293	2.18125	1.91764	2.51713	1012.13	990.457	1027.87
476	Line 25 19CJ09-28065_area16A-line1	19CJ09-28065	16A	SLV	SLVt	46.26	23.31	0.344	0.253	9.74	10.72	6.64	0	1.364	98.665	1.77972	0.960748	0.0256574	0.00824336	0.313377	0.614844	0.301053	0	0.0394735	4.04311	0.662389	2.35934	2.05061	2.68672	1004.84	979.294	1021.37
477	Line 24 19CJ09-28065_area16A-line1	19CJ09-28065	16A	SLV	SLVt	45.55	23.38	0.36	0.233	9.68	10.74	6.95	0	1.414	98.334	1.7608	0.968249	0.0269794	0.00762808	0.312939	0.618942	0.316618	0	0.0411165	4.05327	0.664186	2.62405	2.27245	3.04507	1026.12	1006.68	1039.53
478	Line 23 19CJ09-28065_area16A-line1	19CJ09-28065	16A	SLV	SLVt	45.9	23.44	0.269	0.222	9.45	10.89	6.87	0.019	1.344	98.403	1.76893	0.96778	0.0200982	0.00724584	0.304574	0.625676	0.312021	0.000578889	0.0389621	4.04586	0.672589	2.82465	2.45809	3.2069	1044.76	1034.69	1054.78
479	Line 22 19CJ09-28065_area16A-line1	19CJ09-28065	16A	SLV	SLVt	46.03	23.37	0.336	0.225	9.42	10.92	6.72	0	1.343	98.406	1.77413	0.964995	0.0251068	0.00734456	0.30364	0.627469	0.305242	0	0.0389374	4.04686	0.673894	2.67482	2.35023	3.04286	1028.83	1015.27	1040
480	Line 21 19CJ09-28065_area16A-line1	19CJ09-28065	16A	SLV	SLVt	45.8	23.32	0.331	0.183	9.74	10.7	6.97	0	1.454	98.498	1.76533	0.962964	0.0247341	0.00597378	0.313966	0.614849	0.316608	0	0.0421571	4.04658	0.661972	2.62801	2.27341	3.00648	1028.67	1014.25	1041
481	Line 20 19CJ09-28065_area16A-line1	19CJ09-28065	16A	SLV	SLVt	45.58	23.2	0.309	0.196	9.61	10.81	6.87	0	1.432	98.031	1.76516	0.962544	0.0231994	0.00642844	0.311242	0.62411	0.313543	0	0.0417158	4.04795	0.667246	2.65786	2.3051	3.03289	1031.07	1018.09	1042.85
482	Line 19 19CJ09-28065_area16A-line1	19CJ09-28065	16A	SLV	SLVt	45.6	23.38	0.33	0.256	9.76	10.87	6.75	0	1.392	98.339	1.76313	0.968471	0.0247367	0.00838299	0.315598	0.626577	0.307577	0	0.0404861	4.05496	0.665033	2.46333	2.13225	2.84123	1010.85	984.161	1029.65
483	Line 18 19CJ09-28065_area16A-line1	19CJ09-28065	16A	SLV	SLVt	44.62	23.28	0.362	0.245	10.1	10.24	7.54	0	1.87	98.268	1.73177	0.967976	0.0272381	0.00805312	0.327827	0.592495	0.344874	0	0.0545943	4.05482	0.643791	1.73436	1.47486	2.01222	1016.07	993.253	1038.37
484	Line 17 19CJ09-28065_area16A-line1	19CJ09-28065	16A	SLV	SLVt	45.05	23.13	0.37	0.224	10.02	10.41	7.26	0	1.79	98.293	1.74551	0.960121	0.0277932	0.00735047	0.324683	0.601318	0.331509	0	0.0521708	4.05046	0.649371	1.88742	1.58977	2.20734	1025.27	1001.96	1040.5
485	Line 16 19CJ09-28065_area16A-line1	19CJ09-28065	16A	SLV	SLVt	45.9	23.43	0.351	0.228	9.71	10.8	6.87	0	1.369	98.665	1.76697	0.966298	0.0261958	0.00743345	0.312608	0.61982	0.311676	0	0.039643	4.05065	0.664738	2.68421	2.30494	3.06655	1025	1009.56	1036.97
486	Line 15 19CJ09-28065_area16A-line1	19CJ09-28065	16A	SLV	SLVt	46.09	23.4	0.302	0.21	9.69	11.07	6.91	0.024	1.334	99.031	1.76616	0.960639	0.0224356	0.00681523	0.310534	0.632404	0.312055	0.000727074	0.0384525	4.05022	0.670674	3.03669	2.64018	3.39832	1049.03	1040.12	1059.41
487	Line 14 19CJ09-28065_area16A-line1	19CJ09-28065	16A	SLV	SLVt	45.09	23.17	0.367	0.256	10.39	10.21	7.29	0	1.7	98.474	1.74621	0.96131	0.0275543	0.00839642	0.336507	0.589476	0.332715	0	0.0495234	4.05169	0.636595	1.95503	1.73691	2.23174	988.831	966.306	1014.43
488	Line 13 19CJ09-28065_area16A-line1	19CJ09-28065	16A	SLV	SLVt	44.96	22.98	0.497	0.303	10.61	9.9	7.3	0.023	1.83	98.403	1.74495	0.955495	0.0373957	0.00995951	0.344378	0.572818	0.333895	0.000705715	0.0534261	4.05302	0.624532	1.62677	1.44806	1.88025	969.518	956.546	984.959
489	Line 12 19CJ09-28065_area16A-line1	19CJ09-28065	16A	SLV	SLVt	44.47	23.16	0.408	0.252	10.53	10.02	7.64	0	1.83	98.311	1.72851	0.96442	0.030745	0.00829554	0.342293	0.580628	0.349969	0	0.0535061	4.05837	0.62912	1.74438	1.49815	2.02322	991.71	969.868	1014.21
490	Line 11 19CJ09-28065_area16A-line1	19CJ09-28065	16A	SLV	SLVt	45.82	23.42	0.319	0.218	9.87	10.72	6.94	0	1.313	98.65	1.76566	0.966854	0.0238315	0.00711455	0.318078	0.615846	0.315168	0	0.0380595	4.05061	0.659418	2.87093	2.50678	3.22564	1021.22	1004.34	1034.17
491	Line 1 19CJ09-28065_area17-line1	19CJ09-28065	17	SLV	SLVt	42.58	23.82	0.35	0.173	11.4	9.43	8.92	0	1.7	98.385	1.6689	1.0002	0.026595	0.00574261	0.373674	0.551012	0.412021	0	0.050121	4.08827	0.595891	2.38719	2.09374	2.6141	987.298	975.039	998.674
492	Line 2 19CJ09-28065_area17-line1	19CJ09-28065	17	SLV	SLVt	42.75	23.87	0.319	0.154	10.86	9.87	9.04	0	1.78	98.648	1.66594	0.996546	0.0241003	0.00508256	0.353929	0.57341	0.415166	0	0.0521782	4.08635	0.618339	2.55484	2.23394	2.82211	1011.55	997.796	1027.07
493	Line 3 19CJ09-28065_area17-line1	19CJ09-28065	17	SLV	SLVt	43.27	23.89	0.323	0.191	11.04	9.97	8.45	0	1.69	98.838	1.68382	0.995971	0.024368	0.00629478	0.359287	0.578401	0.387521	0	0.04947	4.08513	0.616837	2.47364	2.14422	2.81486	1009.11	992.968	1026.49
494	Line 4 19CJ09-28065_area17-line1	19CJ09-28065	17	SLV	SLVt	43.91	24.02	0.318	0.187	10.51	10.34	7.99	0	1.583	98.891	1.7027	0.997862	0.0239062	0.00614124	0.340833	0.597752	0.365134	0	0.0461746	4.08051	0.636865	2.63131	2.33859	3.00624	1028	1008.01	1045.35
495	Line 5 19CJ09-28065_area17-line1	19CJ09-28065	17	SLV	SLVt	44.18	23.96	0.241	0.164	10.44	10.41	7.99	0	1.633	99.049	1.70763	0.992147	0.018059	0.00536846	0.337467	0.59985	0.363952	0	0.0474788	4.07195	0.639965	2.65109	2.3993	2.93173	1034.89	1014.67	1049.64
496	Line 7 19CJ09-28065_area17-line1	19CJ09-28065	17	SLV	SLVt	43.17	23.84	0.279	0.148	10.95	9.81	8.63	0	1.69	98.525	1.68351	0.996007	0.0210934	0.00488804	0.357118	0.570333	0.396621	0	0.0495755	4.07915	0.614946	2.68916	2.39556	2.97714	1003.34	990.447	1018.85
497	Line 8 19CJ09-28065_area17-line1	19CJ09-28065	17	SLV	SLVt	44.16	23.43	0.314	0.194	10.91	10.25	9.08	0	1.68	100.031	1.689	0.960055	0.023283	0.00628409	0.348972	0.584454	0.409277	0	0.0483345	4.06966	0.626139	2.9284	2.62619	3.23825	1031.66	1014.6	1048.16
498	Line 9 19CJ09-28065_area17-line1	19CJ09-28065	17	SLV	SLVt	42.96	23.93	0.289	0.174	11.02	9.86	8.57	0.022	1.7	98.547	1.67776	1.00122	0.0218813	0.00575512	0.359925	0.574074	0.394437	0.000679257	0.0499415	4.08568	0.614641	2.48066	2.12075	2.76618	1023.05	1013.31	1033.95
499	Line 10 19CJ09-28065_area17-line1	19CJ09-28065	17	SLV	SLVt	43.43	23.92	0.296	0.153	11.22	9.87	8.54	0	1.477	98.914	1.68858	0.996357	0.0223117	0.00503804	0.364828	0.572103	0.391309	0	0.0431975	4.08372	0.610614	3.08735	2.80438	3.50525	996.409	984.018	1012.97
500	Line 11 19CJ09-28065_area17-line1	19CJ09-28065	17	SLV	SLVt	43.43	23.87	0.322	0.152	11.32	9.91	8.48	0.021	1.456	98.977	1.68857	0.994266	0.0242713	0.00500507	0.368077	0.574416	0.388556	0.000645494	0.042583	4.08639	0.609465	2.96959	2.6062	3.37181	1011.65	1000.49	1023.34
501	Line 12 19CJ09-28065_area17-line1	19CJ09-28065	17	SLV	SLVt	43.56	23.95	0.268	0.142	11.02	10.03	8.44	0	1.409	98.818	1.69311	0.997297	0.0201948	0.00467438	0.358214	0.581196	0.386607	0	0.0411959	4.08249	0.618682	3.40774	3.05204	3.75882	1003.39	987.831	1020.96
502	Line 13 19CJ09-28065_area17-line1	19CJ09-28065	17	SLV	SLVt	43.77	23.95	0.26	0.147	10.71	10.28	8.31	0	1.392	98.838	1.69825	0.995527	0.0195572	0.00483038	0.347519	0.594625	0.379976	0	0.0406266	4.08091	0.63114	3.4216	3.08551	3.77377	1021.14	1002.21	1038.62
503	Line 14 19CJ09-28065_area17-line1	19CJ09-28065	17	SLV	SLVt	44.31	23.94	0.204	0.134	10.3	10.49	8.15	0	1.392	98.928	1.71155	0.990682	0.0152766	0.00438361	0.332728	0.604072	0.371002	0	0.0404458	4.07014	0.644825	3.3081	2.97968	3.66675	1036.07	1015.29	1050
504	Line 15 19CJ09-28065_area17-line1	19CJ09-28065	17	SLV	SLVt	44.52	24.09	0.26	0.105	10	10.67	7.98	0	1.331	98.956	1.71706	0.99538	0.0194407	0.00342971	0.322547	0.613507	0.362713	0	0.0386148	4.07269	0.655418	3.62209	3.27025	4.00932	1043.49	1028.64	1053.8
505	Line 16 19CJ09-28065_area17-line1	19CJ09-28065	17	SLV	SLVt	45.13	24.13	0.242	0.124	9.77	10.9	7.93	0	1.306	99.537	1.72631	0.988858	0.0179464	0.00401712	0.312545	0.621593	0.357485	0	0.0375789	4.06634	0.665419	3.72957	3.33932	4.06841	1053.4	1040.38	1063.34
506	Line 17 19CJ09-28065_area17-line1	19CJ09-28065	17	SLV	SLVt	45.07	24.1	0.241	0.153	9.4	11.15	7.62	0	1.294	99.071	1.73099	0.99162	0.0179445	0.00497664	0.301924	0.638419	0.344898	0	0.0373841	4.06815	0.678921	3.79463	3.43291	4.13834	1061.23	1050.61	1070.85
507	Line 18 19CJ09-28065_area17-line1	19CJ09-28065	17	SLV	SLVt	44.91	23.98	0.211	0.102	9.37	10.97	7.76	0	1.326	98.631	1.73059	0.989969	0.0157631	0.00332881	0.301963	0.630205	0.352405	0	0.0384362	4.06266	0.676064	3.62207	3.27933	3.9568	1056.5	1045.06	1065.23
508	Line 19 19CJ09-28065_area17-line1	19CJ09-28065	17	SLV	SLVt	45.07	23.98	0.226	0.105	9.41	11.05	7.78	0.023	1.286	98.931	1.73128	0.986849	0.0168305	0.00341592	0.302296	0.6328	0.3522	0.000698477	0.0371592	4.06353	0.676722	3.967	3.57939	4.25211	1064.99	1055.73	1072.01
509	Line 20 19CJ09-28065_area17-line1	19CJ09-28065	17	SLV	SLVt	45.05	23.98	0.195	0.119	9.34	11.04	7.75	0	1.304	98.794	1.73256	0.988018	0.0145391	0.00387596	0.300403	0.632977	0.351257	0	0.037724	4.06136	0.678156	3.7702	3.38021	4.08663	1059.73	1050.13	1068.08
510	Line 21 19CJ09-28065_area17-line1	19CJ09-28065	17	SLV	SLVt	44.49	23.81	0.247	0.116	9.45	10.76	8.06	0	1.588	98.557	1.71768	0.984829	0.0184878	0.00379294	0.305123	0.619322	0.366729	0	0.0461186	4.06208	0.669939	2.94957	2.66533	3.33473	1057.14	1045.08	1063.89
511	Line 22 19CJ09-28065_area17-line1	19CJ09-28065	17	SLV	SLVt	44.57	23.87	0.28	0.157	9.41	10.93	8.09	0	1.599	98.907	1.71436	0.983636	0.0208798	0.00511445	0.302701	0.626766	0.366724	0	0.0462653	4.06645	0.674329	3.05106	2.65037	3.47043	1066.71	1058.69	1071.4
512	Line 23 19CJ09-28065_area17-line1	19CJ09-28065	17	SLV	SLVt	44.78	23.96	0.238	0.148	9.39	10.92	8.09	0	1.617	99.172	1.71734	0.98442	0.0176953	0.00480698	0.301162	0.624337	0.365637	0	0.0466474	4.06204	0.674595	2.93517	2.61229	3.31545	1066.03	1059.53	1070.83
513	Line 1 19CJ09-28065_area13C-line1	19CJ09-28065	13C	SLV	SLVt	47.39	23.55	0.239	0.121	8.13	12.36	6.89	0	1.157	99.873	1.78281	0.949141	0.0174311	0.00385515	0.255783	0.693204	0.305469	0	0.0327414	4.04043	0.730467	3.2016	2.82119	3.67792	1062.99	1055.4	1069.71
514	Line 2 19CJ09-28065_area13C-line1	19CJ09-28065	13C	SLV	SLVt	47.52	23.71	0.221	0.114	7.67	12.59	6.55	0	1.107	99.514	1.79118	0.95745	0.0161497	0.0036392	0.241781	0.707479	0.290961	0	0.0313875	4.04003	0.745295	2.58326	2.36799	2.8312	1055.99	1050.57	1061.69
515	Line 3 19CJ09-28065_area13C-line1	19CJ09-28065	13C	SLV	SLVt	48.41	23.73	0.227	0.077	7.18	13.25	5.66	0.034	0.981	99.549	1.81756	0.954495	0.016523	0.00244841	0.225446	0.741643	0.250438	0.0010092	0.0277057	4.03727	0.766882	2.1319	2.02014	2.24914	1048.59	1045.27	1053.16
516	Line 4 19CJ09-28065_area13C-line1	19CJ09-28065	13C	SLV	SLVt	46.79	23.69	0.221	0.143	8.22	12.17	6.92	0.021	1.183	99.378	1.77291	0.961655	0.0162343	0.00458889	0.260476	0.687461	0.309007	0.000629067	0.0337181	4.04668	0.725218	3.32514	2.97787	3.7683	1067.21	1059.94	1073.21
517	Line 5 19CJ09-28065_area13C-line1	19CJ09-28065	13C	SLV	SLVt	45.49	23.49	0.22	0.097	9.22	11.24	8.18	0.02	1.428	99.392	1.73251	0.958437	0.0162439	0.00312874	0.293666	0.63819	0.367149	0.00060219	0.0409103	4.05083	0.684859	3.757	3.37836	4.14794	1066.71	1060.92	1071.52
518	Line 6 19CJ09-28065_area13C-line1	19CJ09-28065	13C	SLV	SLVt	46.1	23.57	0.188	0.112	8.78	11.7	7.57	0	1.35	99.405	1.75145	0.959352	0.0138472	0.00360374	0.278968	0.662685	0.33894	0	0.0385813	4.04742	0.703746	3.71444	3.39471	3.99544	1072.04	1066.61	1074.52
519	Line 7 19CJ09-28065_area13C-line1	19CJ09-28065	13C	SLV	SLVt	47.82	23.92	0.177	0.106	7.6	12.77	5.99	0	1.034	99.46	1.80378	0.966625	0.0129436	0.00338625	0.239746	0.71811	0.266276	0	0.0293388	4.04021	0.749705	2.44461	2.31221	2.59379	1053.06	1049.72	1057.54
520	Line 8 19CJ09-28065_area13C-line1	19CJ09-28065	13C	SLV	SLVt	46.7	23.74	0.222	0.122	8.54	11.88	6.89	0.036	1.208	99.337	1.77292	0.965549	0.0163393	0.00392256	0.27114	0.672377	0.308263	0.00108048	0.0344973	4.04608	0.712629	3.28519	2.94568	3.66841	1072.46	1066.51	1077.75
521	Line 9 19CJ09-28065_area13C-line1	19CJ09-28065	13C	SLV	SLVt	45.85	23.79	0.271	0.09	9.04	11.39	7.36	0	1.238	99.059	1.7529	0.974395	0.0200861	0.00291407	0.289035	0.649184	0.331609	0	0.0356029	4.05573	0.691932	3.97591	3.64497	4.24173	1065.54	1054.05	1072.89
522	Line 10 19CJ09-28065_area13C-line1	19CJ09-28065	13C	SLV	SLVt	46.18	23.83	0.219	0.129	9	11.38	7.37	0	1.27	99.384	1.75765	0.971682	0.0161596	0.00415821	0.286473	0.645721	0.330579	0	0.0363603	4.04878	0.692689	3.73902	3.40546	4.02845	1066.14	1056.74	1073.4
523	Line 11 19CJ09-28065_area13C-line1	19CJ09-28065	13C	SLV	SLVt	46.05	23.78	0.264	0.125	9.03	11.33	7.4	0	1.239	99.223	1.75622	0.971593	0.0195192	0.00403738	0.288006	0.644177	0.332592	0	0.0355441	4.05169	0.691041	4.05797	3.71464	4.38308	1067.19	1056.89	1074.72
524	Line 12 19CJ09-28065_area13C-line1	19CJ09-28065	13C	SLV	SLVt	45.97	23.76	0.208	0.13	9.03	11.47	7.37	0	1.27	99.228	1.7535	0.970956	0.0153816	0.00419965	0.28806	0.652258	0.331305	0	0.0364402	4.0521	0.693657	3.78293	3.46898	4.06146	1067.77	1058.33	1073.79
525	Line 13 19CJ09-28065_area13C-line1	19CJ09-28065	13C	SLV	SLVt	45.66	23.76	0.246	0.132	9.09	11.25	7.65	0	1.288	99.085	1.74542	0.973042	0.0182308	0.00427342	0.290597	0.641122	0.344631	0	0.0370361	4.05435	0.688107	3.94716	3.61614	4.25083	1066.71	1058.32	1074.49
526	Line 14 19CJ09-28065_area13C-line1	19CJ09-28065	13C	SLV	SLVt	45.49	23.62	0.247	0.124	9.35	11.05	7.79	0	1.327	98.998	1.74192	0.968977	0.0183365	0.00402135	0.299424	0.630811	0.351544	0	0.0382234	4.05326	0.67812	3.79461	3.43281	4.13998	1061.38	1051.89	1069.71
527	Line 15 19CJ09-28065_area13C-line1	19CJ09-28065	13C	SLV	SLVt	45.52	23.63	0.247	0.11	9.26	11.13	7.78	0	1.308	98.995	1.74244	0.969038	0.0183299	0.00356604	0.296435	0.635148	0.350966	0	0.0376625	4.05358	0.681794	3.92227	3.57592	4.26721	1062.47	1053.38	1070.92
528	Line 16 19CJ09-28065_area13C-line1	19CJ09-28065	13C	SLV	SLVt	44.73	23.68	0.286	0.162	9.57	10.68	8.32	0	1.383	98.815	1.72086	0.975999	0.0213314	0.00527837	0.307908	0.612551	0.377224	0	0.0400234	4.06117	0.665484	3.75142	3.37136	4.14759	1059.79	1048.08	1067.01
529	Line 19 19CJ09-28065_area13C-line1	19CJ09-28065	13C	SLV	SLVt	45.47	23.64	0.273	0.128	9.24	11.13	7.84	0.024	1.341	99.108	1.73921	0.968715	0.0202441	0.00414644	0.295571	0.634668	0.353405	0.000725743	0.0385835	4.05527	0.682263	4.00885	3.61638	4.33577	1069.9	1062.24	1075.33
530	Line 20 19CJ09-28065_area13C-line1	19CJ09-28065	13C	SLV	SLVt	45.76	23.66	0.243	0.139	9.26	11.27	7.61	0	1.266	99.214	1.74741	0.967935	0.0179897	0.00449534	0.295722	0.641591	0.342471	0	0.0363655	4.05398	0.6845	3.96323	3.62149	4.27748	1065.29	1055.49	1073.77
531	Line 21 19CJ09-28065_area13C-line1	19CJ09-28065	13C	SLV	SLVt	46.27	23.7	0.232	0.136	8.88	11.54	7.2	0	1.235	99.214	1.76282	0.967336	0.0171358	0.00438819	0.282933	0.655448	0.323273	0	0.0353933	4.04872	0.698488	3.73837	3.37636	4.06802	1067.82	1059.55	1073.37
532	Line 22 19CJ09-28065_area13C-line1	19CJ09-28065	13C	SLV	SLVt	46.07	23.66	0.275	0.14	8.9	11.45	7.23	0	1.205	98.932	1.76087	0.968825	0.0203774	0.00453185	0.284487	0.652438	0.325669	0	0.0346451	4.05184	0.696361	4.06004	3.68354	4.36516	1067.4	1057.34	1074.23
533	Line 24 19CJ09-28065_area13C-line1	19CJ09-28065	13C	SLV	SLVt	46.46	23.68	0.248	0.123	8.66	11.91	6.96	0.027	1.176	99.247	1.76725	0.96499	0.0182886	0.00396244	0.275487	0.675392	0.312003	0.000811947	0.0336491	4.05184	0.710282	3.61732	3.2623	4.02769	1071.68	1065.58	1076.87
534	Line 25 19CJ09-28065_area13C-line1	19CJ09-28065	13C	SLV	SLVt	45.46	23.64	0.28	0.129	9.39	11.16	7.88	0	1.304	99.244	1.73723	0.967824	0.020744	0.00417499	0.300093	0.635793	0.354881	0	0.0374844	4.05822	0.679349	4.05988	3.67205	4.40475	1065.28	1055.25	1072.75
535	Line 1 19CJ09-28065_area13B-line1	19CJ09-28065	13B	SLV	SLVt	44.43	23.64	0.426	0.344	11.56	9.58	7.03	0	1.189	98.202	1.74171	0.992818	0.0323756	0.0114208	0.378985	0.559874	0.324777	0	0.0350613	4.07703	0.596335	1.99559	1.79462	2.29435	874.699	862.699	886.335
536	Line 3 19CJ09-28065_area13B-line1	19CJ09-28065	13B	SLV	SLVt	44.68	23.39	0.518	0.31	12.08	9.62	6.24	0	1.158	98.018	1.75905	0.986548	0.039537	0.0103363	0.397737	0.564632	0.289521	0	0.0342942	4.08166	0.58671	1.62603	1.49572	1.83339	881.168	870.648	890.452
537	Line 4 19CJ09-28065_area13B-line1	19CJ09-28065	13B	SLV	SLVt	44.87	23.48	0.441	0.318	12.07	9.59	6.36	0	1.185	98.332	1.75951	0.986407	0.0335261	0.0105609	0.395828	0.560634	0.293916	0	0.0349543	4.07534	0.586154	1.63099	1.51255	1.81554	878.962	867.701	888.795
538	Line 5 19CJ09-28065_area13B-line1	19CJ09-28065	13B	SLV	SLVt	42.27	23.52	0.459	0.312	12.52	8.5	8.81	0	1.8	98.209	1.66997	0.995486	0.0351558	0.0104393	0.41366	0.500633	0.410187	0	0.0534927	4.08902	0.547563	1.55388	1.43095	1.70253	886.782	875.455	898.405
539	Line 6 19CJ09-28065_area13B-line1	19CJ09-28065	13B	SLV	SLVt	43.95	23.81	0.367	0.189	10.58	10.04	8.05	0	1.519	98.528	1.7095	0.992182	0.0276748	0.00622602	0.344159	0.582195	0.369008	0	0.0444441	4.07539	0.62848	2.58841	2.28571	2.93682	1008.4	992.106	1027.98
540	Line 7 19CJ09-28065_area13B-line1	19CJ09-28065	13B	SLV	SLVt	44.08	23.88	0.317	0.232	10.47	10.2	7.99	0	1.501	98.699	1.71083	0.992934	0.0238524	0.0076259	0.33984	0.590187	0.365461	0	0.0438219	4.07455	0.634591	2.77975	2.47124	3.14581	1018.33	999.274	1041.79
541	Line 8 19CJ09-28065_area13B-line1	19CJ09-28065	13B	SLV	SLVt	44.03	23.78	0.404	0.19	10.38	10.18	8.08	0	1.528	98.609	1.70959	0.989184	0.0304112	0.00624792	0.337058	0.589272	0.36973	0	0.0446286	4.07612	0.636136	2.60434	2.27778	2.96319	1018.63	1001.76	1040.87
542	Line 9 19CJ09-28065_area13B-line1	19CJ09-28065	13B	SLV	SLVt	43.74	23.75	0.342	0.22	10.5	10.04	8.23	0	1.51	98.346	1.70403	0.991253	0.0258305	0.00725873	0.342099	0.58312	0.377858	0	0.0442509	4.0757	0.630251	2.80743	2.47977	3.13932	1016.53	998.708	1037.1
543	Line 10 19CJ09-28065_area13B-line1	19CJ09-28065	13B	SLV	SLVt	43.39	23.82	0.358	0.22	10.45	10	8.31	0	1.582	98.142	1.69547	0.997161	0.0271202	0.00728053	0.341493	0.582541	0.382677	0	0.0465001	4.08025	0.630433	2.59825	2.3024	2.93978	1018.21	1001.45	1036.19
544	Line 11 19CJ09-28065_area13B-line1	19CJ09-28065	13B	SLV	SLVt	43.5	23.81	0.346	0.195	10.48	10.04	8.43	0	1.594	98.403	1.69435	0.993563	0.0261275	0.00643261	0.341381	0.583005	0.386965	0	0.0467034	4.07853	0.630695	2.66263	2.35619	3.03547	1021.57	1004.99	1041.29
545	Line 12 19CJ09-28065_area13B-line1	19CJ09-28065	13B	SLV	SLVt	44.39	23.57	0.456	0.328	11.6	9.81	7.09	0	1.532	98.776	1.73043	0.984354	0.0344622	0.0108288	0.378174	0.570117	0.325721	0	0.0449236	4.07901	0.601205	1.68114	1.53217	1.88323	886.992	872.123	902.006
546	Line 13 19CJ09-28065_area13B-line1	19CJ09-28065	13B	SLV	SLVt	44.34	23.58	0.456	0.274	12.11	9.65	7.07	0	1.573	99.068	1.72759	0.984264	0.0344445	0.00904139	0.394597	0.560529	0.324635	0	0.0461021	4.08121	0.586864	1.68583	1.53597	1.87956	906.026	895.373	920.662
547	Line 14 19CJ09-28065_area13B-line1	19CJ09-28065	13B	SLV	SLVt	44.39	23.56	0.494	0.283	12.11	9.63	7.07	0.037	1.524	99.098	1.72883	0.983025	0.0372995	0.00933453	0.394435	0.559137	0.324502	0.00113924	0.0446476	4.08235	0.586361	1.84823	1.66142	2.05963	971.578	961.802	981.209
548	Line 15 19CJ09-28065_area13B-line1	19CJ09-28065	13B	SLV	SLVt	44.72	23.6	0.446	0.29	12.11	9.61	7.11	0	1.583	99.475	1.73327	0.979936	0.0335125	0.0095192	0.392529	0.55528	0.324761	0	0.046152	4.07496	0.585857	1.66771	1.52788	1.85239	900.088	889.233	912.89
549	Line 16 19CJ09-28065_area13B-line1	19CJ09-28065	13B	SLV	SLVt	42.85	23.68	0.398	0.256	11.69	9.43	8.63	0.044	1.81	98.804	1.67451	0.991382	0.0301529	0.00847258	0.382046	0.549381	0.397446	0.00135936	0.0532062	4.08796	0.589827	1.77402	1.47542	2.05391	1012.13	995.263	1026.98
550	Line 1 19CJ09-28065_area8A-line1	19CJ09-28065	8A	SLV	SLVt	39.51	22.88	0.388	0.222	14.35	7.67	12.73	0.02	2.8	100.614	1.53664	0.953332	0.0292554	0.00731237	0.466747	0.44472	0.583478	0.000614952	0.0819163	4.10402	0.487917	6.48202	5.82519	7.05252	1026.95	1016.98	1036.86
551	Line 2 19CJ09-28065_area8A-line1	19CJ09-28065	8A	SLV	SLVt	37.9	23.24	0.355	0.205	15.15	7.02	11.84	0	2.99	98.7	1.51823	0.997372	0.0275699	0.00695491	0.507546	0.419239	0.55896	0	0.0900983	4.12597	0.452358	4.69051	3.7794	5.34771	974.517	963.785	995.909
552	Line 4 19CJ09-28065_area8A-line1	19CJ09-28065	8A	SLV	SLVt	39.65	23.34	0.319	0.241	13.91	7.62	10.42	0	2.69	98.199	1.58307	0.99834	0.0246919	0.00814914	0.464458	0.453561	0.490291	0	0.0807894	4.10335	0.494065	1.66501	1.41518	2.16546	933.263	923.246	941.534
553	Line 5 19CJ09-28065_area8A-line1	19CJ09-28065	8A	SLV	SLVt	39.64	23.4	0.328	0.248	13.93	7.6	10.34	0	2.71	98.198	1.58336	1.00134	0.0253996	0.00838949	0.465329	0.452568	0.486738	0	0.0814255	4.10455	0.493049	1.54841	1.31857	1.89719	928.852	916.1	936.829
554	Line 6 19CJ09-28065_area8A-line1	19CJ09-28065	8A	SLV	SLVt	39.15	23.35	0.32	0.219	14.38	7.3	10.74	0	2.87	98.329	1.56575	1.00046	0.0248113	0.00741779	0.480966	0.435251	0.506205	0	0.0863416	4.10721	0.475052	2.04032	1.48171	2.64039	938.413	931.815	947.955
555	Line 7 19CJ09-28065_area8A-line1	19CJ09-28065	8A	SLV	SLVt	38.91	23.33	0.328	0.202	14.32	7.17	10.86	0	2.92	98.056	1.56099	1.00271	0.0255106	0.00686324	0.480447	0.428828	0.513451	0	0.0881187	4.10692	0.471615	2.27026	1.54531	2.89059	942.757	934.891	953.165
556	Line 8 19CJ09-28065_area8A-line1	19CJ09-28065	8A	SLV	SLVt	39.59	23.42	0.304	0.244	13.87	7.51	10.42	0	2.85	98.214	1.5807	1.00178	0.0235313	0.00825074	0.463132	0.447022	0.4903	0	0.0855964	4.10032	0.49115	1.55399	1.29967	2.04216	931.391	920.551	939.538
557	Line 9 19CJ09-28065_area8A-line1	19CJ09-28065	8A	SLV	SLVt	40.15	23.49	0.33	0.236	13.46	7.95	10.18	0.04	2.51	98.345	1.59628	1.00053	0.0254359	0.00794648	0.447541	0.471212	0.476982	0.00125727	0.0750661	4.10225	0.512882	1.37277	1.19079	1.62925	991.567	983.871	997.551
558	Line 10 19CJ09-28065_area8A-line1	19CJ09-28065	8A	SLV	SLVt	40.43	23.54	0.336	0.206	13.3	8.21	9.85	0	2.42	98.317	1.60655	1.00212	0.0258843	0.00693259	0.441982	0.48636	0.461271	0	0.0723354	4.10343	0.523901	1.6138	1.47727	1.80122	940.203	935.325	948.015
559	Line 11 19CJ09-28065_area8A-line1	19CJ09-28065	8A	SLV	SLVt	40.92	23.66	0.315	0.226	13.17	8.49	9.53	0	2.19	98.506	1.62063	1.00389	0.0241861	0.00758044	0.436211	0.50128	0.444806	0	0.0652436	4.10382	0.534703	1.77807	1.58725	1.96762	947.664	938.72	954.271
560	Line 12 19CJ09-28065_area8A-line1	19CJ09-28065	8A	SLV	SLVt	40.91	23.63	0.298	0.232	13.38	8.28	9.49	0	2.18	98.408	1.6233	1.00451	0.0229242	0.00779645	0.444007	0.489808	0.443779	0	0.0650688	4.1012	0.524523	1.8256	1.65793	2.0079	935.639	929.68	944.195
561	Line 1 19CJ09-28065_area8A-line2	19CJ09-28065	8A	SLV	SLVt	43.63	23.52	0.308	0.363	13.6	8.79	7.02	0.023	1.521	98.775	1.71922	0.9929	0.0235291	0.0121141	0.448176	0.516369	0.325997	0.000716504	0.0450839	4.0841	0.53535	1.61079	1.45371	1.80303	891.441	885.029	901.604
562	Line 2 19CJ09-28065_area8A-line2	19CJ09-28065	8A	SLV	SLVt	44.92	23.76	0.242	0.269	12.28	9.65	6.52	0.025	1.291	98.958	1.75114	0.992316	0.0182897	0.00888122	0.400354	0.560833	0.299543	0.000770489	0.0378577	4.06999	0.58348	1.8904	1.76924	2.03611	954.327	943.218	965.503
563	Line 3 19CJ09-28065_area8A-line2	19CJ09-28065	8A	SLV	SLVt	45.05	23.9	0.348	0.254	11.82	10.04	6.66	0.021	1.264	99.368	1.74601	0.992368	0.0261481	0.00833729	0.383119	0.580111	0.304198	0.000643453	0.0368507	4.07779	0.602256	1.96285	1.77259	2.23486	965.123	951.975	977.669
564	Line 4 19CJ09-28065_area8A-line2	19CJ09-28065	8A	SLV	SLVt	45.46	23.77	0.222	0.294	11.55	10.44	6.71	0	1.262	99.72	1.75033	0.980488	0.0165711	0.00958687	0.371909	0.599261	0.304469	0	0.0365508	4.06917	0.617051	2.26863	2.04262	2.55243	940.93	922.414	959.54
565	Line 5 19CJ09-28065_area8A-line2	19CJ09-28065	8A	SLV	SLVt	45.22	23.6	0.308	0.262	12.47	9.76	6.75	0	1.293	99.669	1.74932	0.978075	0.0230992	0.00858378	0.40343	0.562876	0.307732	0	0.0376256	4.07074	0.582503	2.04646	1.87468	2.27276	911.816	900.535	923.83
566	Line 6 19CJ09-28065_area8A-line2	19CJ09-28065	8A	SLV	SLVt	44.74	23.57	0.261	0.344	12.77	9.59	6.84	0	1.291	99.406	1.73989	0.98199	0.0196777	0.0113298	0.415317	0.555993	0.313481	0	0.0377657	4.07544	0.572415	2.02285	1.8641	2.21143	859.675	849.487	872.537
567	Line 7 19CJ09-28065_area8A-line2	19CJ09-28065	8A	SLV	SLVt	43.1	23.43	0.29	0.318	13.93	8.49	7.68	0.02	1.71	98.968	1.69762	0.988683	0.0221447	0.0106079	0.458857	0.498535	0.356496	0.000622785	0.0506647	4.08423	0.520722	1.68422	1.51832	1.82547	913.219	898.874	924.789
568	Line 8 19CJ09-28065_area8A-line2	19CJ09-28065	8A	SLV	SLVt	43.29	23.37	0.289	0.291	13.92	8.49	7.4	0	1.579	98.66	1.70995	0.988958	0.0221311	0.00973484	0.459833	0.499953	0.344476	0	0.0469165	4.08196	0.520901	1.84176	1.69062	2.01057	874.144	864.339	882.904
569	Line 9 19CJ09-28065_area8A-line2	19CJ09-28065	8A	SLV	SLVt	43.88	23.64	0.33	0.371	13.36	9.04	6.83	0	1.449	98.903	1.72502	0.99563	0.0251507	0.0123521	0.439237	0.529812	0.316431	0	0.0428492	4.08649	0.546734	1.6299	1.48718	1.78352	838.339	834.157	845.167
570	Line 10 19CJ09-28065_area8A-line2	19CJ09-28065	8A	SLV	SLVt	43.59	23.5	0.28	0.303	13.57	8.83	7.09	0	1.529	98.696	1.71805	0.992292	0.0213952	0.0101142	0.447294	0.518842	0.329326	0	0.0453319	4.08265	0.537028	1.8224	1.69821	2.0139	873.877	860.474	880.968
571	Line 11 19CJ09-28065_area8A-line2	19CJ09-28065	8A	SLV	SLVt	44.75	23.64	0.299	0.305	12.16	9.9	6.46	0	1.267	98.785	1.74772	0.989119	0.0226391	0.0100883	0.39717	0.57642	0.297332	0	0.0372222	4.07771	0.592056	1.81933	1.6729	1.99616	892.521	878.315	906.621
572	Line 12 19CJ09-28065_area8A-line2	19CJ09-28065	8A	SLV	SLVt	44.51	23.58	0.3	0.343	12.77	9.5	6.59	0	1.322	98.916	1.74158	0.98844	0.022757	0.0113663	0.417868	0.554157	0.303879	0	0.0389101	4.07895	0.570106	1.77702	1.63457	1.94845	857.55	848.615	869.838
573	Line 13 19CJ09-28065_area8A-line2	19CJ09-28065	8A	SLV	SLVt	45.53	23.26	0.29	0.28	12.19	10.19	6.51	0.027	1.321	99.598	1.75779	0.962059	0.0217058	0.00915518	0.393584	0.586502	0.296197	0.000824098	0.0383636	4.06618	0.598419	1.96505	1.79025	2.18978	963.034	947.846	979.308
574	Line 15 19CJ09-28065_area8A-line2	19CJ09-28065	8A	SLV	SLVt	43.74	23.52	0.289	0.342	13.45	8.91	6.99	0	1.407	98.651	1.72372	0.992995	0.0220797	0.0114144	0.443275	0.523468	0.324635	0	0.0417088	4.08329	0.541476	1.86462	1.70423	2.03205	848.266	842.524	859.367
575	Line 16 19CJ09-28065_area8A-line2	19CJ09-28065	8A	SLV	SLVt	43.13	23.46	0.348	0.313	13.63	8.7	7.49	0	1.563	98.635	1.70299	0.992388	0.0266391	0.0104668	0.450082	0.512125	0.348533	0	0.0464234	4.08964	0.53224	1.58894	1.47882	1.76486	869.539	855.273	879.511
576	Line 17 19CJ09-28065_area8A-line2	19CJ09-28065	8A	SLV	SLVt	41.87	23.39	0.326	0.272	13.66	8.2	8.62	0	1.94	98.285	1.66206	0.994707	0.0250882	0.00914431	0.453479	0.485268	0.403256	0	0.0579284	4.09093	0.516932	1.61362	1.43915	1.77182	902.741	892.968	916.894
577	Line 18 19CJ09-28065_area8A-line2	19CJ09-28065	8A	SLV	SLVt	40.63	23.45	0.264	0.27	13.93	7.95	9.78	0	2.3	98.582	1.61318	0.997472	0.0203211	0.00907901	0.462541	0.470574	0.45762	0	0.0686926	4.09948	0.504304	1.92522	1.78089	2.06958	904.911	895.014	919.768
578	Line 19 19CJ09-28065_area8A-line2	19CJ09-28065	8A	SLV	SLVt	40.33	23.44	0.305	0.257	13.82	7.96	9.85	0	2.38	98.344	1.60568	0.999792	0.0235417	0.00866566	0.460152	0.472463	0.462164	0	0.0712776	4.10373	0.5066	1.73156	1.57441	1.91324	917.655	905.211	927.555
579	Line 20 19CJ09-28065_area8A-line2	19CJ09-28065	8A	SLV	SLVt	40.65	23.32	0.288	0.261	13.97	7.89	9.7	0	2.46	98.593	1.6144	0.992207	0.0221744	0.00877872	0.463993	0.467147	0.453998	0	0.0734908	4.09619	0.501693	1.71368	1.541	1.89111	910.864	900.177	923.059
580	Line 21 19CJ09-28065_area8A-line2	19CJ09-28065	8A	SLV	SLVt	39.9	23.29	0.373	0.247	13.85	7.64	10.36	0	2.63	98.304	1.59001	0.994301	0.0288167	0.00833609	0.461573	0.453884	0.486538	0	0.0788367	4.10229	0.495801	1.5363	1.29609	1.91508	928.946	917.332	938.03
581	Line 23 19CJ09-28065_area8A-line2	19CJ09-28065	8A	SLV	SLVt	39.23	23.34	0.393	0.219	14.21	7.45	10.9	0	2.79	98.543	1.56412	0.99695	0.0303775	0.00739492	0.473814	0.442825	0.512162	0	0.083676	4.11132	0.483096	2.32982	1.61526	3.05372	946.825	937.985	959.578
582	Line 24 19CJ09-28065_area8A-line2	19CJ09-28065	8A	SLV	SLVt	39.59	23.3	0.372	0.218	13.82	7.66	10.74	0	2.7	98.418	1.57612	0.993758	0.0287114	0.00735018	0.460124	0.454628	0.503892	0	0.0808561	4.10544	0.496996	2.14891	1.54107	2.6972	949.37	940.211	958.689
583	Line 25 19CJ09-28065_area8A-line2	19CJ09-28065	8A	SLV	SLVt	39.96	23.55	0.299	0.21	13.52	7.77	10.2	0	2.61	98.12	1.59345	1.00607	0.023115	0.00709206	0.450873	0.461913	0.479341	0	0.078289	4.10014	0.506047	1.76256	1.54624	2.00108	939.269	933.778	944.831
584	Line 1 20MAL08b-28284_area16-line1	20MAL08b-28284	16	SLV	SLVa	42.93	23.71	0.279	0.09	8.89	10.68	8.8	0.05	2.6	98.029	1.66728	0.986506	0.0210068	0.00296024	0.288743	0.618362	0.402772	0.00153519	0.0759567	4.06512	0.681687	0.858325	0.642016	1.07402	1081.23	1074.28	1087.41
585	Line 2 20MAL08b-28284_area16-line1	20MAL08b-28284	16	SLV	SLVa	44.85	24.05	0.221	0.083	7.92	11.87	7.58	0.034	2.15	98.765	1.71681	0.986274	0.0164007	0.00269077	0.253542	0.677386	0.341948	0.00102893	0.0619078	4.05799	0.727646	1.02611	0.689781	1.41526	1078.68	1072.97	1083.91
586	Line 3 20MAL08b-28284_area16-line1	20MAL08b-28284	16	SLV	SLVa	45.41	24.03	0.239	0.119	7.73	11.89	7.35	0	2.08	98.85	1.73311	0.982538	0.017684	0.00384644	0.246727	0.676519	0.330591	0	0.059715	4.05073	0.732762	0.946711	0.631527	1.37901	1079.23	1074.24	1084.84
587	Line 4 20MAL08b-28284_area16-line1	20MAL08b-28284	16	SLV	SLVa	45.69	24.09	0.237	0.104	7.69	12.19	7.14	0.052	1.93	99.137	1.73839	0.981942	0.0174817	0.00335119	0.24469	0.691442	0.320151	0.00156414	0.0552371	4.05425	0.738616	0.884318	0.534513	1.3044	1077.62	1071.9	1083.04
588	Line 5 20MAL08b-28284_area16-line1	20MAL08b-28284	16	SLV	SLVa	45.77	24.05	0.211	0.082	7.55	12.12	7.23	0	1.97	99.005	1.74133	0.980252	0.0155629	0.00264212	0.240221	0.68743	0.324167	0	0.0563785	4.04799	0.741044	1.29695	0.985859	1.70737	1072.93	1066.43	1079
589	Line 6 20MAL08b-28284_area16-line1	20MAL08b-28284	16	SLV	SLVa	45.07	23.79	0.174	0.144	8.36	12.21	7.03	0.037	1.92	98.755	1.72824	0.97731	0.0129352	0.00467646	0.268093	0.698001	0.317688	0.00112166	0.0553813	4.06344	0.722498	1.52167	1.17811	1.91433	1072.83	1067.23	1077.96
590	Line 7 20MAL08b-28284_area16-line1	20MAL08b-28284	16	SLV	SLVa	44.93	23.83	0.234	0.09	8.36	11.85	7.7	0.047	2.11	99.151	1.71497	0.974465	0.0173159	0.00290939	0.266864	0.674316	0.346371	0.00141828	0.0605827	4.05921	0.716458	1.30436	0.942723	1.67581	1077.73	1072.7	1083.33
591	Line 8 20MAL08b-28284_area16-line1	20MAL08b-28284	16	SLV	SLVa	44.69	23.85	0.221	0.093	8.05	11.56	7.93	0.03	2.19	98.626	1.71293	0.979354	0.0164221	0.00301892	0.258041	0.660559	0.358206	0.000909066	0.0631422	4.05258	0.719093	1.18581	0.834901	1.62508	1083.58	1077.71	1088.84
592	Line 9 20MAL08b-28284_area16-line1	20MAL08b-28284	16	SLV	SLVa	46.47	24.1	0.183	0.105	7.42	12.6	6.5	0.056	1.72	99.162	1.7629	0.979479	0.0134591	0.00337353	0.235409	0.71261	0.290603	0.00167954	0.049083	4.0486	0.751683	1.18389	0.955222	1.46224	1069.23	1063.54	1075.99
593	Line 10 20MAL08b-28284_area16-line1	20MAL08b-28284	16	SLV	SLVa	46.13	24.04	0.177	0.091	7.5	12.54	6.61	0.063	1.72	98.91	1.75647	0.980648	0.0130659	0.00293452	0.238826	0.711834	0.296612	0.00189645	0.0492642	4.05155	0.748779	1.18057	0.950262	1.46399	1068.82	1063.5	1074.58
594	Line 11 20MAL08b-28284_area16-line1	20MAL08b-28284	16	SLV	SLVa	46.75	24	0.202	0.078	7.29	12.8	6.41	0.087	1.639	99.284	1.76912	0.972993	0.0148196	0.00249983	0.230711	0.722123	0.285867	0.0026028	0.0466554	4.0474	0.757869	1.38428	1.14973	1.63719	1061.75	1057.36	1067.76
595	Line 12 20MAL08b-28284_area16-line1	20MAL08b-28284	16	SLV	SLVa	47.32	23.93	0.256	0.087	7.02	13.33	5.85	0.046	1.276	99.126	1.78951	0.969515	0.0187689	0.00278643	0.222019	0.751528	0.260721	0.00137528	0.0362984	4.05253	0.771948	1.92772	1.81239	2.06014	1051.83	1047.21	1057.93
596	Line 13 20MAL08b-28284_area16-line1	20MAL08b-28284	16	SLV	SLVa	47.36	23.95	0.227	0.085	6.98	13.29	5.89	0.027	1.313	99.144	1.7901	0.969822	0.0166341	0.00272096	0.22064	0.748884	0.262367	0.000806814	0.0373315	4.0493	0.772425	2.00775	1.91171	2.11862	1056.7	1050.65	1064.55
597	Line 14 20MAL08b-28284_area16-line1	20MAL08b-28284	16	SLV	SLVa	47.82	24	0.222	0.086	6.89	13.52	5.71	0.053	1.226	99.564	1.79821	0.966859	0.0161842	0.00273884	0.216677	0.757934	0.253044	0.00157562	0.034679	4.0479	0.777679	1.99432	1.8749	2.12634	1048.86	1044.69	1054.1
598	Line 16 20MAL08b-28284_area16-line1	20MAL08b-28284	16	SLV	SLVa	49.3	24.16	0.149	0.071	5.89	14.34	4.44	0.076	0.95	99.399	1.8446	0.968442	0.0108081	0.00224984	0.184304	0.799887	0.19578	0.00224809	0.0267377	4.03505	0.812736	2.78642	2.58808	2.97766	1083.65	1074.98	1092.05
599	Line 17 20MAL08b-28284_area16-line1	20MAL08b-28284	16	SLV	SLVa	49.52	24.29	0.156	0.09	5.79	14.51	4.19	0.053	0.869	99.479	1.85074	0.972556	0.0113031	0.0028487	0.18097	0.808458	0.184548	0.00156598	0.0244304	4.03742	0.817096	3.28587	3.12611	3.42491	1090.92	1080.73	1100.04
600	Line 18 20MAL08b-28284_area16-line1	20MAL08b-28284	16	SLV	SLVa	50.35	24.26	0.171	0.109	5.82	14.97	4.25	0.041	0.906	100.877	1.85272	0.956362	0.0121987	0.00339684	0.1791	0.821214	0.184301	0.00119272	0.0250775	4.03556	0.820956	2.99758	2.74864	3.19527	1083.76	1073.16	1094.43
601	Line 19 20MAL08b-28284_area16-line1	20MAL08b-28284	16	SLV	SLVa	49.04	24.35	0.199	0.086	5.97	14.3	4.39	0.056	0.902	99.304	1.83983	0.978697	0.014474	0.00273253	0.187312	0.799812	0.194098	0.00166096	0.0254554	4.04407	0.810245	2.63758	2.46117	2.80481	1069.32	1061.51	1077.59
602	Line 20 20MAL08b-28284_area16-line1	20MAL08b-28284	16	SLV	SLVa	48.36	24.29	0.164	0.074	6.53	13.86	4.83	0	1.033	99.162	1.82284	0.98087	0.0119843	0.00236228	0.205844	0.778843	0.214555	0	0.0292893	4.04659	0.790955	2.54264	2.39584	2.65203	1067.75	1062.52	1074.26
603	Line 21 20MAL08b-28284_area16-line1	20MAL08b-28284	16	SLV	SLVa	47.87	24.17	0.173	0.074	6.75	13.65	4.82	0.026	1.219	98.797	1.81504	0.981797	0.0127168	0.00237626	0.214038	0.771579	0.215377	0.000779366	0.0347675	4.04847	0.782839	2.13459	1.99687	2.28844	1067.61	1062.31	1074.43
604	Line 22 20MAL08b-28284_area16-line1	20MAL08b-28284	16	SLV	SLVa	47.82	24.15	0.149	0.116	6.72	13.37	5	0	1.303	98.645	1.81473	0.98184	0.0109622	0.00372819	0.213272	0.756411	0.223615	0	0.0371957	4.04175	0.78006	2.19415	2.09848	2.30965	1071.66	1066.43	1077.56
605	Line 23 20MAL08b-28284_area16-line1	20MAL08b-28284	16	SLV	SLVa	47.58	24.26	0.132	0.116	6.83	13.31	5.29	0.019	1.386	98.93	1.80238	0.984544	0.00969404	0.00372151	0.216375	0.751667	0.236161	0.000569011	0.0394941	4.04461	0.776482	2.22361	2.13062	2.32728	1079.7	1073.22	1086.31
606	Line 24 20MAL08b-28284_area16-line1	20MAL08b-28284	16	SLV	SLVa	47.55	24.14	0.134	0.09	6.63	13.42	5.15	0	1.415	98.545	1.80624	0.982392	0.00986822	0.00289539	0.210622	0.759982	0.230549	0	0.0404323	4.04298	0.782999	2.14562	2.06166	2.23693	1080.95	1074.27	1088
607	Line 25 20MAL08b-28284_area16-line1	20MAL08b-28284	16	SLV	SLVa	48.48	24.28	0.201	0.086	6.18	13.84	4.56	0.072	1.175	98.897	1.82995	0.981857	0.014709	0.00274925	0.195088	0.778823	0.202849	0.0021486	0.0333627	4.04154	0.799686	2.02307	1.86531	2.19918	1064.78	1058.82	1071.37
608	Line 26 20MAL08b-28284_area16-line1	20MAL08b-28284	16	SLV	SLVa	49.56	24.36	0.167	0.069	5.58	14.5	3.82	0.089	0.864	99.012	1.8599	0.979395	0.0121502	0.00219304	0.175128	0.811244	0.168948	0.00264054	0.0243904	4.03599	0.822452	2.97328	2.768	3.12842	1084.44	1077.22	1091.35
609	Line 28 20MAL08b-28284_area16-line1	20MAL08b-28284	16	SLV	SLVa	49.56	24.29	0.225	0.081	5.88	14.44	3.85	0.038	0.859	99.256	1.8583	0.975739	0.0163559	0.00257222	0.184385	0.807191	0.170128	0.00112645	0.0242283	4.04002	0.814049	2.67976	2.54057	2.82312	1073.22	1065.39	1080.88
610	Line 29 20MAL08b-28284_area16-line1	20MAL08b-28284	16	SLV	SLVa	49.42	24.31	0.191	0.095	5.83	14.36	3.88	0.045	0.867	99.033	1.85731	0.97879	0.0139163	0.00302374	0.183238	0.804566	0.171848	0.00133703	0.0245103	4.03854	0.8145	2.9227	2.74323	3.10272	1081.19	1072.29	1089.08
611	Line 30 20MAL08b-28284_area16-line1	20MAL08b-28284	16	SLV	SLVa	49.36	24.26	0.173	0.108	6.12	14.26	4	0.031	0.916	99.255	1.85294	0.97566	0.0125904	0.00343359	0.192132	0.79805	0.17696	0.00092001	0.0258659	4.03855	0.805963	3.10138	2.91298	3.24957	1078.43	1069.02	1089.44
612	Line 31 20MAL08b-28284_area16-line1	20MAL08b-28284	16	SLV	SLVa	48.58	24.2	0.162	0.121	6.4	13.8	4.57	0.034	1.161	99.034	1.83163	0.977502	0.0118414	0.00386371	0.201801	0.775683	0.203061	0.00101345	0.0329275	4.03932	0.79355	2.36999	2.21503	2.51213	1070.99	1063.9	1078.07
613	Line 32 20MAL08b-28284_area16-line1	20MAL08b-28284	16	SLV	SLVa	47.85	24.17	0.118	0.12	6.69	13.47	5.05	0.048	1.429	98.95	1.80999	0.979471	0.00865333	0.00384426	0.211633	0.759601	0.22512	0.00143542	0.0406604	4.0404	0.782099	2.15942	2.06367	2.25474	1079.45	1073.67	1085.12
614	Line 33 20MAL08b-28284_area16-line1	20MAL08b-28284	16	SLV	SLVa	48.05	24.17	0.16	0.11	6.67	13.49	5.03	0.023	1.357	99.072	1.81444	0.977794	0.0117132	0.00351788	0.210639	0.759427	0.223845	0.000686628	0.0385456	4.04061	0.782861	2.11493	2.01469	2.20877	1078.05	1071.08	1085.26
615	Line 34 20MAL08b-28284_area16-line1	20MAL08b-28284	16	SLV	SLVa	47.98	24.18	0.17	0.091	6.64	13.57	4.93	0.036	1.373	98.983	1.81384	0.979301	0.0124593	0.00291352	0.209928	0.764791	0.219642	0.00107593	0.039044	4.04299	0.784627	2.02404	1.90065	2.12559	1073.59	1067.06	1080.73
616	Line 35 20MAL08b-28284_area16-line1	20MAL08b-28284	16	SLV	SLVa	48.44	24.15	0.136	0.092	6.36	13.94	4.5	0	1.208	98.858	1.82982	0.977334	0.00995981	0.00294327	0.200921	0.785039	0.20033	0	0.0343255	4.04067	0.796218	2.3793	2.19182	2.57123	1079.99	1072.95	1088.05
617	Line 36 20MAL08b-28284_area16-line1	20MAL08b-28284	16	SLV	SLVa	47.4	24.22	0.189	0.077	6.93	13.41	5.38	0.041	1.422	99.111	1.79453	0.982353	0.0138721	0.00246889	0.219416	0.756877	0.24004	0.00122716	0.0404965	4.05128	0.775256	1.95671	1.82963	2.09601	1062.06	1056.24	1068.62
618	Line 38 20MAL08b-28284_area16-line1	20MAL08b-28284	16	SLV	SLVa	47.2	24.28	0.161	0.101	6.81	13.32	5.44	0.048	1.449	98.83	1.79173	0.987417	0.0118485	0.00324706	0.216192	0.753805	0.243365	0.00144051	0.0413756	4.05042	0.777121	2.05922	1.93808	2.1764	1069.51	1063.31	1076.3
619	Line 39 20MAL08b-28284_area16-line1	20MAL08b-28284	16	SLV	SLVa	47.18	24.13	0.158	0.062	6.84	13.35	5.48	0.025	1.461	98.702	1.79216	0.981971	0.0116355	0.00199457	0.21729	0.756007	0.245318	0.000750766	0.0417461	4.04887	0.776749	2.16334	2.05311	2.28491	1068.12	1062.25	1075.01
620	Line 40 20MAL08b-28284_area16-line1	20MAL08b-28284	16	SLV	SLVa	47.58	24.11	0.183	0.097	6.67	13.54	5.22	0.036	1.417	98.883	1.8021	0.978303	0.0134374	0.00311146	0.211273	0.764536	0.232999	0.00107796	0.0403711	4.04721	0.783489	1.98392	1.86326	2.11339	1070.91	1063.77	1078.26
621	Line 41 20MAL08b-28284_area16-line1	20MAL08b-28284	16	SLV	SLVa	48.77	24.23	0.19	0.122	6.21	14.03	4.67	0.071	1.21	99.509	1.82824	0.973098	0.0138084	0.00387329	0.194687	0.784086	0.206314	0.00210419	0.0341203	4.04033	0.801091	2.0704	1.92159	2.22004	1063.02	1057.54	1068.96
622	Line 42 20MAL08b-28284_area16-line1	20MAL08b-28284	16	SLV	SLVa	48.94	24.3	0.195	0.114	5.99	14.21	4.52	0.13	1.201	99.646	1.83131	0.974152	0.0141463	0.00361278	0.187451	0.792716	0.199327	0.0038458	0.0338055	4.04037	0.808756	2.03548	1.86995	2.22016	1063.79	1058.37	1070.47
623	Line 43 20MAL08b-28284_area16-line1	20MAL08b-28284	16	SLV	SLVa	47.89	24.22	0.177	0.083	6.51	13.62	5.29	0.059	1.488	99.354	1.80288	0.976826	0.0129182	0.00264629	0.204958	0.764404	0.234697	0.00175597	0.0421376	4.04322	0.788564	1.91363	1.77901	2.05014	1070.2	1063.36	1077.21
624	Line 44 20MAL08b-28284_area16-line1	20MAL08b-28284	16	SLV	SLVa	47.74	24.11	0.152	0.088	6.99	13.29	5.42	0.034	1.536	99.392	1.80012	0.973954	0.0111115	0.00281022	0.220425	0.747083	0.240851	0.00101355	0.0435669	4.04094	0.772173	2.0607	1.93692	2.16197	1074.21	1067.6	1080.18
625	Line 45 20MAL08b-28284_area16-line1	20MAL08b-28284	16	SLV	SLVa	48.05	24.19	0.162	0.078	6.91	13.5	5.26	0	1.458	99.654	1.80599	0.974048	0.0118045	0.00248288	0.217202	0.756452	0.232991	0	0.0412217	4.04219	0.776921	2.04941	1.94931	2.14573	1071.72	1065.92	1077.34
626	Line 1 20MAL08b-28284_area4-line1	20MAL08b-28284	4	SLV	SLVa	47.58	23.7	0.352	0.135	8	13.1	4.97	0.02	1.373	99.238	1.80568	0.963577	0.0258981	0.00433899	0.253904	0.741161	0.222281	0.000600055	0.0391952	4.05663	0.744837	1.72761	1.62694	1.83168	1057.13	1053.21	1061.28
627	Line 2 20MAL08b-28284_area4-line1	20MAL08b-28284	4	SLV	SLVa	47.24	24.22	0.13	0.106	6.45	13.74	5.28	0.133	1.455	98.767	1.79164	0.984093	0.00955854	0.00340474	0.20458	0.776876	0.235996	0.00398783	0.0415097	4.05164	0.791554	2.092	1.95323	2.26462	1078.52	1073.24	1084.56
628	Line 3 20MAL08b-28284_area4-line1	20MAL08b-28284	4	SLV	SLVa	47.46	24.22	0.171	0.084	6.4	13.72	5.3	0.118	1.385	98.859	1.79655	0.982219	0.0125492	0.00269296	0.202608	0.774268	0.236439	0.00353134	0.0394374	4.0503	0.792596	2.00909	1.85804	2.1545	1069.38	1063.84	1075.05
629	Line 4 20MAL08b-28284_area4-line1	20MAL08b-28284	4	SLV	SLVa	47.14	24.29	0.129	0.076	6.53	13.76	5.38	0.129	1.393	98.879	1.78757	0.986787	0.00948357	0.00244077	0.207086	0.777888	0.240429	0.00386731	0.0397348	4.05529	0.789755	2.13269	1.99945	2.29546	1074.07	1068.37	1079.76
630	Line 5 20MAL08b-28284_area4-line1	20MAL08b-28284	4	SLV	SLVa	47.95	24.36	0.133	0.062	6.07	13.92	5.13	0.138	1.273	99.052	1.80767	0.983854	0.00972056	0.00197953	0.191374	0.78234	0.227918	0.00411297	0.0360999	4.04507	0.803459	2.10218	1.9615	2.29142	1082.67	1075.69	1090.63
631	Line 6 20MAL08b-28284_area4-line1	20MAL08b-28284	4	SLV	SLVa	47.87	24.22	0.156	0.11	6.14	13.83	5.04	0.101	1.266	98.737	1.81076	0.981506	0.0114401	0.00352394	0.194236	0.779909	0.224676	0.00302039	0.0360227	4.04509	0.800609	2.06575	1.92952	2.21102	1072.82	1066.91	1079.66
632	Line 7 20MAL08b-28284_area4-line1	20MAL08b-28284	4	SLV	SLVa	47.28	24.26	0.145	0.096	6.72	13.62	5.48	0.045	1.431	99.085	1.78876	0.983301	0.0106353	0.00307598	0.212621	0.768202	0.244334	0.00134596	0.0407249	4.053	0.783222	2.1389	2.03801	2.24958	1072.49	1066.19	1079.37
633	Line 8 20MAL08b-28284_area4-line1	20MAL08b-28284	4	SLV	SLVa	47.14	24.23	0.138	0.083	6.64	13.44	5.47	0.087	1.458	98.703	1.79015	0.985767	0.0101598	0.00266941	0.210878	0.760892	0.244803	0.00261194	0.0416488	4.04958	0.782996	2.05445	1.92028	2.19847	1068.46	1062.43	1074.29
634	Line 9 20MAL08b-28284_area4-line1	20MAL08b-28284	4	SLV	SLVa	47.48	24.3	0.155	0.062	6.49	13.67	5.27	0.055	1.317	98.81	1.79887	0.986321	0.0113849	0.00198939	0.205636	0.772118	0.235305	0.0016474	0.0375338	4.05081	0.789686	2.11854	2.00855	2.26653	1068.17	1061.24	1074.93
635	Line 10 20MAL08b-28284_area4-line1	20MAL08b-28284	4	SLV	SLVa	47.41	24.3	0.124	0.086	6.57	13.82	5.39	0.076	1.37	99.168	1.79105	0.983479	0.0090817	0.00275153	0.207571	0.778341	0.239969	0.00226984	0.0389317	4.05344	0.789463	2.14423	2.01807	2.28178	1072.65	1065.92	1079.28
636	Line 11 20MAL08b-28284_area4-line1	20MAL08b-28284	4	SLV	SLVa	47.25	24.21	0.166	0.094	6.7	13.52	5.52	0.046	1.427	98.965	1.78982	0.982481	0.0121906	0.0030156	0.212249	0.7635	0.24642	0.00137756	0.040661	4.05172	0.782476	2.0843	1.95567	2.20477	1067.64	1060.93	1075.03
637	Line 12 20MAL08b-28284_area4-line1	20MAL08b-28284	4	SLV	SLVa	47.1	24.33	0.196	0.096	6.67	13.5	5.43	0.047	1.381	98.792	1.78891	0.989993	0.0144322	0.00308801	0.211864	0.764411	0.243051	0.00141127	0.0394555	4.05662	0.782987	1.96662	1.84609	2.09395	1064.35	1057.31	1071.34
638	Line 13 20MAL08b-28284_area4-line1	20MAL08b-28284	4	SLV	SLVa	46.83	24.19	0.168	0.074	6.84	13.29	5.66	0.028	1.505	98.588	1.78245	0.986395	0.0123968	0.00238541	0.217727	0.754124	0.253886	0.00084255	0.0430899	4.0533	0.775967	2.13254	1.98502	2.25652	1068.7	1061.71	1076.54
639	Line 14 20MAL08b-28284_area4-line1	20MAL08b-28284	4	SLV	SLVa	47.12	24.22	0.234	0.102	6.91	13.16	5.68	0	1.47	98.92	1.78766	0.984408	0.0172109	0.00327731	0.21924	0.74432	0.253955	0	0.041951	4.05202	0.772468	1.85609	1.75893	1.94861	1067.51	1060.47	1073.95
640	Line 15 20MAL08b-28284_area4-line1	20MAL08b-28284	4	SLV	SLVa	46.59	24.12	0.198	0.097	7.11	13.12	5.87	0	1.546	98.692	1.77483	0.984379	0.014623	0.00312949	0.226515	0.745113	0.263531	0	0.0443016	4.05642	0.766871	1.79911	1.67861	1.92779	1066.17	1059.41	1072.4
641	Line 16 20MAL08b-28284_area4-line1	20MAL08b-28284	4	SLV	SLVa	46.27	24.01	0.146	0.092	7.13	13.04	6.08	0.034	1.361	98.18	1.77143	0.984778	0.0108364	0.00298298	0.228285	0.744264	0.27432	0.00102908	0.0391948	4.05712	0.765271	2.15605	2.01526	2.28834	1064.84	1059.15	1070.62
642	Line 17 20MAL08b-28284_area4-line1	20MAL08b-28284	4	SLV	SLVa	47.12	24.12	0.202	0.09	6.68	13.52	5.7	0.064	1.284	98.797	1.78735	0.980173	0.0148547	0.00289124	0.211906	0.764549	0.254805	0.00191924	0.0366366	4.05508	0.782984	2.07512	1.9573	2.22669	1052.27	1047.37	1058.48
643	Line 18 20MAL08b-28284_area4-line1	20MAL08b-28284	4	SLV	SLVa	47.16	24.04	0.172	0.078	6.62	13.52	5.7	0.078	1.317	98.684	1.78919	0.9771	0.0126508	0.0025062	0.210041	0.764688	0.254852	0.0023395	0.037585	4.05095	0.784513	2.21635	2.08786	2.36374	1055.29	1050.23	1061.15
644	Line 19 20MAL08b-28284_area4-line1	20MAL08b-28284	4	SLV	SLVa	47	23.75	0.147	0.113	6.52	13.84	5.77	0.1	1.335	98.616	1.78374	0.965649	0.0108158	0.00363204	0.20694	0.783059	0.258071	0.0030004	0.038112	4.05302	0.790969	2.32035	2.18242	2.46907	1058.38	1053.48	1064.16
645	Line 21 20MAL08b-28284_area4-line1	20MAL08b-28284	4	SLV	SLVa	47.81	24.06	0.181	0.107	6.13	14.01	5.22	0.15	1.139	98.816	1.80649	0.973944	0.0132588	0.00342404	0.193705	0.789186	0.232443	0.00448077	0.0323733	4.0493	0.802923	2.45718	2.23898	2.62876	1069.63	1063.95	1076.13
646	Line 22 20MAL08b-28284_area4-line1	20MAL08b-28284	4	SLV	SLVa	47.8	24.11	0.153	0.083	6.21	13.89	5.26	0.09	1.152	98.775	1.80733	0.976625	0.0112152	0.00265782	0.196365	0.782953	0.234382	0.00269027	0.0327648	4.04698	0.799488	2.28681	2.12258	2.40859	1070.45	1064.22	1077.86
647	Line 23 20MAL08b-28284_area4-line1	20MAL08b-28284	4	SLV	SLVa	48.4	24.12	0.126	0.092	5.98	14.01	4.93	0.117	1.085	98.87	1.82396	0.973799	0.00920553	0.00293627	0.188467	0.787106	0.218951	0.00348579	0.0307571	4.03867	0.806814	2.34153	2.23015	2.44474	1088.26	1081.01	1096.76
648	Line 24 20MAL08b-28284_area4-line1	20MAL08b-28284	4	SLV	SLVa	48.09	24.08	0.131	0.131	6.03	13.87	5.05	0.122	1.126	98.631	1.81813	0.975321	0.00960172	0.00419449	0.190656	0.781755	0.225004	0.00364648	0.0320224	4.04033	0.803935	2.44678	2.30237	2.57593	1076.66	1070.44	1084.06
649	Line 25 20MAL08b-28284_area4-line1	20MAL08b-28284	4	SLV	SLVa	48.21	24.07	0.103	0.068	6.18	13.81	5.08	0.076	1.142	98.754	1.82028	0.973644	0.00753959	0.00217445	0.195144	0.777357	0.226046	0.00226861	0.032435	4.03689	0.799338	2.28891	2.13311	2.39539	1083.22	1076.91	1091.82
650	Line 26 20MAL08b-28284_area4-line1	20MAL08b-28284	4	SLV	SLVa	47.55	24.16	0.13	0.072	6.77	13.38	5.53	0.043	1.255	98.899	1.80007	0.979845	0.00954092	0.00230839	0.214334	0.755126	0.246714	0.00128692	0.0357379	4.04496	0.778914	2.32464	2.20646	2.47484	1066.21	1061.46	1072.42
651	Line 27 20MAL08b-28284_area4-line1	20MAL08b-28284	4	SLV	SLVa	47.4	24.05	0.174	0.096	6.66	13.36	5.46	0	1.276	98.533	1.80144	0.979213	0.0128203	0.00308994	0.211679	0.756958	0.244547	0	0.0364785	4.04622	0.781467	2.17383	2.05192	2.31727	1067.68	1061.42	1075.37
652	Line 28 20MAL08b-28284_area4-line1	20MAL08b-28284	4	SLV	SLVa	47.48	24.09	0.198	0.083	6.57	13.44	5.46	0.038	1.276	98.635	1.80101	0.978956	0.0145606	0.00266637	0.208417	0.760026	0.244077	0.00113955	0.0364084	4.04726	0.784792	2.09669	1.97962	2.22861	1063.26	1055.99	1071.19
653	Line 29 20MAL08b-28284_area4-line1	20MAL08b-28284	4	SLV	SLVa	47.71	24.06	0.183	0.099	6.73	13.38	5.45	0.025	1.282	98.918	1.80463	0.974981	0.0134195	0.00317141	0.212891	0.7545	0.242943	0.00074759	0.0364765	4.04376	0.779933	2.16148	2.04243	2.29557	1066.94	1060.54	1074.6
654	Line 30 20MAL08b-28284_area4-line1	20MAL08b-28284	4	SLV	SLVa	47.57	24.11	0.148	0.086	6.73	13.36	5.49	0.026	1.238	98.772	1.80269	0.97883	0.0108732	0.0027601	0.213288	0.754779	0.245183	0.000778944	0.0352903	4.04447	0.779676	2.35166	2.23268	2.45935	1071.15	1064.56	1078.45
655	Line 31 20MAL08b-28284_area4-line1	20MAL08b-28284	4	SLV	SLVa	47.6	24.01	0.142	0.088	6.71	13.33	5.48	0.041	1.268	98.67	1.8046	0.975186	0.0104369	0.0028255	0.212745	0.753405	0.244841	0.00122886	0.0361609	4.04143	0.779801	2.28443	2.18247	2.42281	1069.3	1063.2	1076.32
656	Line 1 20MAL08b-28284_area3-line1	20MAL08b-28284	3	SLV	SLVa	44.61	23.74	0.247	0.064	8.15	11.81	7.5	0.106	1.85	98.081	1.72088	0.981119	0.0184724	0.00209092	0.26293	0.679194	0.340966	0.00323273	0.053683	4.06257	0.720918	1.60469	1.28891	1.92118	1067.27	1063.44	1070.95
657	Line 2 20MAL08b-28284_area3-line1	20MAL08b-28284	3	SLV	SLVa	45.83	23.78	0.195	0.076	7.35	12.54	6.72	0.146	1.668	98.304	1.75378	0.974896	0.0144666	0.00246307	0.235221	0.715396	0.303057	0.00441695	0.0480139	4.05171	0.75256	1.35591	1.07109	1.65645	1068.94	1064.24	1074.88
658	Line 3 20MAL08b-28284_area3-line1	20MAL08b-28284	3	SLV	SLVa	46.2	23.84	0.232	0.072	7.16	12.91	6.24	0.133	1.569	98.371	1.7655	0.976007	0.0171878	0.00233022	0.228824	0.735489	0.281022	0.00401811	0.0451018	4.05548	0.762708	1.70375	1.42869	1.90852	1063.94	1059.75	1069.43
659	Line 4 20MAL08b-28284_area3-line1	20MAL08b-28284	3	SLV	SLVa	47.54	23.99	0.18	0.075	6.36	13.49	5.42	0.102	1.324	98.507	1.80368	0.975108	0.0132398	0.00240991	0.2018	0.763023	0.242343	0.00305947	0.0377863	4.04245	0.790842	2.09194	1.92619	2.24159	1061.9	1056.86	1067.68
660	Line 5 20MAL08b-28284_area3-line1	20MAL08b-28284	3	SLV	SLVa	47.91	24.08	0.152	0.065	6.12	13.83	5.07	0.139	1.2	98.591	1.81376	0.976632	0.0111559	0.00208403	0.193762	0.780548	0.226199	0.00416018	0.0341728	4.04247	0.801129	2.16255	1.98958	2.34054	1076.84	1071.08	1083.99
661	Line 6 20MAL08b-28284_area3-line1	20MAL08b-28284	3	SLV	SLVa	48.28	24.25	0.162	0.079	6.05	13.86	4.71	0.084	1.159	98.634	1.82584	0.982495	0.0118774	0.00253024	0.191344	0.78142	0.209917	0.00251143	0.0329705	4.04091	0.803298	2.16387	2.00912	2.31528	1073.83	1067.03	1082.69
662	Line 7 20MAL08b-28284_area3-line1	20MAL08b-28284	3	SLV	SLVa	48.29	24.3	0.147	0.089	6.19	13.98	4.71	0.051	1.17	98.936	1.82231	0.982409	0.0107545	0.00284442	0.195352	0.786496	0.209467	0.00152153	0.0332121	4.04436	0.801036	2.45549	2.29526	2.60269	1081.26	1073.65	1089.71
663	Line 8 20MAL08b-28284_area3-line1	20MAL08b-28284	3	SLV	SLVa	47.52	24.13	0.169	0.074	6.46	13.57	5.22	0.033	1.24	98.457	1.8059	0.982416	0.0124512	0.0023817	0.205311	0.768814	0.233785	0.00099146	0.0354474	4.04749	0.789235	2.1996	2.06643	2.35525	1072.67	1065.47	1079.6
664	Line 9 20MAL08b-28284_area3-line1	20MAL08b-28284	3	SLV	SLVa	46.93	24.16	0.186	0.072	6.97	13.21	5.38	0	1.293	98.239	1.79393	0.989402	0.013784	0.00233091	0.222818	0.752803	0.242363	0	0.0371791	4.05461	0.771614	2.08009	1.94383	2.23172	1061.2	1057.09	1066.09
665	Line 5 20MAL08b-28284_area2-line1	20MAL08b-28284	2	SLV	SLVa	45.41	23.98	0.214	0.096	7.63	11.82	7.35	0.023	1.93	98.473	1.73845	0.983519	0.015883	0.00311259	0.244287	0.674612	0.331611	0.000696121	0.0555796	4.04775	0.734153	1.41859	1.01879	1.86284	1079.68	1075.03	1084.74
666	Line 8 20MAL08b-28284_area2-line1	20MAL08b-28284	2	SLV	SLVa	45.06	23.96	0.231	0.077	7.73	11.93	7.15	0.038	1.83	98.011	1.73568	0.988753	0.0172504	0.00251194	0.249013	0.685085	0.324575	0.0011572	0.0530245	4.05705	0.733419	1.43416	1.02259	1.82061	1070.93	1065.87	1075.8
667	Line 9 20MAL08b-28284_area2-line1	20MAL08b-28284	2	SLV	SLVa	45.39	23.91	0.208	0.092	7.58	12.28	6.74	0.046	1.75	98.004	1.74663	0.985693	0.0155171	0.00299824	0.243934	0.704471	0.305654	0.0013994	0.0506552	4.05695	0.742795	1.21135	0.953455	1.52311	1072.31	1066.76	1077.16
668	Line 10 20MAL08b-28284_area2-line1	20MAL08b-28284	2	SLV	SLVa	47.61	24.18	0.227	0.102	6.43	13.64	5	0.049	1.232	98.472	1.80919	0.984385	0.0167233	0.00328266	0.204344	0.772727	0.223917	0.00147207	0.0352163	4.05126	0.790861	1.92394	1.79471	2.07064	1062.79	1057.18	1069.13
669	Line 11 20MAL08b-28284_area2-line1	20MAL08b-28284	2	SLV	SLVa	47.49	24.28	0.198	0.107	6.37	13.6	4.84	0.033	1.147	98.082	1.81263	0.992834	0.0146514	0.00345882	0.203333	0.773873	0.217711	0.000995783	0.0329318	4.05241	0.791924	2.0983	1.97293	2.21967	1069.02	1063.35	1075.46
670	Line 12 20MAL08b-28284_area2-line1	20MAL08b-28284	2	SLV	SLVa	47.23	24.25	0.121	0.128	6.73	13.39	5.13	0.047	1.25	98.276	1.80198	0.991208	0.00895004	0.00413599	0.214739	0.761617	0.230663	0.00141767	0.0358746	4.05058	0.780061	2.31517	2.19489	2.47636	1072.1	1066.82	1077.64
671	Line 13 20MAL08b-28284_area2-line1	20MAL08b-28284	2	SLV	SLVa	47.12	24.18	0.139	0.1	6.84	13.15	5.47	0.032	1.434	98.475	1.79444	0.986509	0.0102623	0.00322524	0.217842	0.746575	0.245494	0.000963425	0.0410788	4.04639	0.77412	2.17856	2.07983	2.28673	1077.24	1070.25	1083.75
672	Line 14 20MAL08b-28284_area2-line1	20MAL08b-28284	2	SLV	SLVa	47.24	24.27	0.212	0.122	6.85	13.14	5.48	0	1.404	98.737	1.79498	0.987962	0.0156168	0.00392597	0.217672	0.744336	0.245391	0	0.0401293	4.05001	0.773731	1.94906	1.85778	2.03424	1064.35	1058.62	1070.21
673	Line 16 20MAL08b-28284_area2-line1	20MAL08b-28284	2	SLV	SLVa	46.63	24.29	0.185	0.112	7.48	12.59	5.76	0	1.4	98.45	1.78351	0.995315	0.013718	0.003628	0.239263	0.717896	0.259635	0	0.0402796	4.05325	0.750028	2.04289	1.90267	2.18101	1059.5	1054.15	1065.32
674	Line 17 20MAL08b-28284_area2-line1	20MAL08b-28284	2	SLV	SLVa	47.75	24.26	0.157	0.12	6.92	13.53	5.08	0.036	1.275	99.167	1.80594	0.982975	0.0115117	0.0038437	0.218877	0.762873	0.226425	0.00107641	0.0362732	4.04979	0.777055	2.1876	2.0846	2.31005	1066.36	1060.39	1072.33
675	Line 1 20MAL08b-28284_area8-line1	20MAL08b-28284	8	SLV	SLVa	41.91	23.71	0.303	0.1	9.52	9.74	10.18	0.02	2.99	98.487	1.62653	0.985818	0.0227979	0.00328687	0.30899	0.563543	0.465609	0.000613646	0.0872892	4.06447	0.64587	0.892424	0.382758	1.28707	1051.98	1044.35	1060.03
676	Line 2 20MAL08b-28284_area8-line1	20MAL08b-28284	8	SLV	SLVa	44.78	23.78	0.185	0.122	7.97	11.9	7.55	0.135	2.08	98.514	1.71833	0.977591	0.0137627	0.00396481	0.255768	0.680762	0.341429	0.00409545	0.060039	4.05575	0.726899	0.974572	0.660265	1.34842	1078.73	1072.46	1084.81
677	Line 3 20MAL08b-28284_area8-line1	20MAL08b-28284	8	SLV	SLVa	45.75	23.84	0.202	0.067	7.5	12.51	6.75	0.081	1.83	98.53	1.74844	0.976087	0.0149665	0.00216857	0.239709	0.712758	0.304014	0.00244732	0.0526087	4.0532	0.748328	1.07532	0.842046	1.35215	1061.88	1057.1	1067.07
678	Line 4 20MAL08b-28284_area8-line1	20MAL08b-28284	8	SLV	SLVa	46.78	23.95	0.175	0.102	6.72	13.27	5.9	0.109	1.571	98.577	1.77871	0.9756	0.0129	0.00328461	0.213687	0.752212	0.264379	0.00327654	0.0449332	4.04898	0.778769	1.91044	1.7147	2.06299	1065.18	1059.98	1071.48
679	Line 5 20MAL08b-28284_area8-line1	20MAL08b-28284	8	SLV	SLVa	48.01	24.15	0.148	0.091	6.08	13.86	4.96	0.134	1.264	98.748	1.81525	0.978235	0.0108486	0.00291396	0.192252	0.781254	0.221012	0.00400547	0.0359499	4.04172	0.802516	2.0567	1.9292	2.22938	1081.79	1075.82	1089.38
680	Line 6 20MAL08b-28284_area8-line1	20MAL08b-28284	8	SLV	SLVa	47.42	24.19	0.203	0.061	6.7	13.38	5.26	0.048	1.356	98.657	1.80133	0.984443	0.0149499	0.00196246	0.212849	0.757729	0.235477	0.00144151	0.0387471	4.04893	0.780699	1.87079	1.7552	2.00285	1059.2	1053.86	1065.68
681	Line 7 20MAL08b-28284_area8-line1	20MAL08b-28284	8	SLV	SLVa	46.46	24.17	0.175	0.094	6.97	13.11	5.88	0.038	1.509	98.433	1.77389	0.988656	0.0129537	0.00303958	0.222558	0.746232	0.264578	0.00114703	0.0433393	4.05639	0.770272	1.95704	1.79044	2.10578	1067.03	1060.16	1073.96
682	Line 8 20MAL08b-28284_area8-line1	20MAL08b-28284	8	SLV	SLVa	47.28	24.1	0.156	0.118	6.69	13.33	5.43	0.027	1.397	98.529	1.79737	0.981522	0.0114973	0.00379911	0.212692	0.755468	0.243271	0.000811465	0.0399488	4.04638	0.780313	2.21853	2.11698	2.31968	1073.82	1066.4	1081.83
683	Line 9 20MAL08b-28284_area8-line1	20MAL08b-28284	8	SLV	SLVa	47.3	24.18	0.166	0.081	6.71	13.14	5.56	0.054	1.404	98.597	1.79688	0.984095	0.0122257	0.00260605	0.213179	0.744182	0.248922	0.0016218	0.040121	4.04384	0.777326	2.07797	1.95467	2.20556	1064.68	1057.85	1071.96
684	Line 10 20MAL08b-28284_area8-line1	20MAL08b-28284	8	SLV	SLVa	47.38	24.1	0.132	0.074	6.47	13.5	5.37	0.072	1.365	98.5	1.79994	0.98085	0.00972179	0.00238086	0.205557	0.764579	0.240419	0.00216243	0.039007	4.04462	0.788116	2.16202	2.0296	2.29713	1071.35	1064.76	1078.37
685	Line 11 20MAL08b-28284_area8-line1	20MAL08b-28284	8	SLV	SLVa	48.58	24.35	0.157	0.071	6.05	14.07	4.68	0.094	1.153	99.233	1.82616	0.980622	0.0114417	0.00226036	0.190195	0.788497	0.207327	0.00279353	0.0326029	4.0419	0.805664	2.18945	2.04088	2.34898	1074.2	1067.64	1082.07
686	Line 12 20MAL08b-28284_area8-line1	20MAL08b-28284	8	SLV	SLVa	48.07	24.18	0.174	0.1	6.25	13.58	4.84	0.074	1.19	98.475	1.82309	0.982452	0.0127935	0.00321197	0.198233	0.767817	0.216326	0.00221876	0.033949	4.04009	0.7948	2.07102	1.93167	2.22264	1068.76	1063.37	1075.24
687	Line 13 20MAL08b-28284_area8-line1	20MAL08b-28284	8	SLV	SLVa	48.55	24.16	0.166	0.067	6.23	14.06	4.52	0	0.955	98.733	1.83439	0.977963	0.0121596	0.00214396	0.196859	0.791979	0.201267	0	0.0271427	4.04391	0.800919	2.72015	2.54017	2.90465	1072.88	1064.86	1081.45
688	Line 14 20MAL08b-28284_area8-line1	20MAL08b-28284	8	SLV	SLVa	49.25	24.32	0.162	0.083	6	14.22	4.16	0.032	0.864	99.098	1.85045	0.978941	0.0118003	0.00264112	0.188532	0.796518	0.184202	0.00095053	0.0244192	4.03845	0.808606	3.22625	3.04038	3.38312	1086.58	1075.19	1099
689	Line 15 20MAL08b-28284_area8-line1	20MAL08b-28284	8	SLV	SLVa	47.86	24.06	0.186	0.08	6.02	13.78	4.75	0.076	1.212	98.052	1.82171	0.981122	0.0137255	0.0025789	0.191631	0.781951	0.213073	0.00228699	0.034702	4.04278	0.803169	1.95567	1.82206	2.12089	1070.92	1065.02	1078.3
690	Line 17 20MAL08b-28284_area8-line1	20MAL08b-28284	8	SLV	SLVa	47.48	24.14	0.129	0.103	6.2	13.29	5.22	0.049	1.435	98.08	1.80903	0.985357	0.00952868	0.00332361	0.197556	0.754891	0.234388	0.00147596	0.0411275	4.03668	0.792581	2.12595	2.01774	2.23108	1086.98	1080.74	1094.1
691	Line 1 20MAL08b-28284_area9-line2	20MAL08b-28284	9	SLV	SLVa	48.79	23.91	0.16	0.098	6.16	14.49	3.71	0.067	1.002	98.409	1.8489	0.970696	0.0117547	0.00314519	0.195221	0.818606	0.165686	0.00200725	0.0285625	4.04457	0.807442	2.81734	2.64803	2.99786	1073.03	1066.25	1082.19
692	Line 2 20MAL08b-28284_area9-line2	20MAL08b-28284	9	SLV	SLVa	50	24.05	0.098	0.101	5.29	15.27	2.78	0.054	0.791	98.436	1.8832	0.970429	0.00715585	0.00322171	0.166627	0.857414	0.123396	0.00160792	0.0224104	4.03546	0.837285	1.38656	1.247	1.52235	1095.89	1090.96	1100.61
693	Line 3 20MAL08b-28284_area9-line2	20MAL08b-28284	9	SLV	SLVa	50.22	24.08	0.092	0.117	5.52	15.08	2.94	0.033	0.796	98.9	1.88375	0.967664	0.00669025	0.00371682	0.173161	0.843281	0.129964	0.0009786	0.0224598	4.03166	0.82964	1.55542	1.4181	1.67718	1103.76	1096.27	1110.18
694	Line 4 20MAL08b-28284_area9-line2	20MAL08b-28284	9	SLV	SLVa	49.53	24.07	0.144	0.106	5.66	14.86	3.3	0	0.875	98.563	1.86773	0.972396	0.0105273	0.00338524	0.178495	0.835389	0.146652	0	0.0248199	4.03939	0.82395	2.10157	1.80062	2.44862	1098.9	1090.26	1107.4
695	Line 5 20MAL08b-28284_area9-line2	20MAL08b-28284	9	SLV	SLVa	49.66	24.06	0.118	0.13	5.62	14.92	3.34	0	0.855	98.752	1.86862	0.969913	0.00860806	0.00414283	0.176854	0.836968	0.148113	0	0.0242007	4.03742	0.825557	2.36903	2.0394	2.66451	1104.68	1095.6	1111.89
696	Line 6 20MAL08b-28284_area9-line2	20MAL08b-28284	9	SLV	SLVa	48.93	23.86	0.152	0.13	5.87	14.39	3.96	0.108	1.066	98.493	1.84905	0.965975	0.0111359	0.0041606	0.185513	0.810698	0.176359	0.00322658	0.0303024	4.03642	0.813781	2.89595	2.74169	3.03465	1075.35	1067.16	1083.21
697	Line 7 20MAL08b-28284_area9-line2	20MAL08b-28284	9	SLV	SLVa	50.41	24.25	0.137	0.1	5.39	15.08	2.83	0	0.732	98.951	1.88907	0.973566	0.00995315	0.00317373	0.168921	0.842477	0.124982	0	0.0206343	4.03278	0.832982	1.67669	1.53285	1.85467	1094.66	1086.35	1101.38
698	Line 8 20MAL08b-28284_area9-line2	20MAL08b-28284	9	SLV	SLVa	50.15	24.12	0.116	0.15	5.66	15.02	3.16	0	0.76	99.182	1.87787	0.967594	0.00842094	0.0047569	0.177245	0.838473	0.139448	0	0.0214069	4.03521	0.825498	1.83307	1.61878	2.10477	1092.6	1082.82	1101.14
699	Line 8 20MAL08b-28284_area9-line3	20MAL08b-28284	9	SLV	SLVa	49.96	24.25	0.147	0.103	6.05	14.69	3.18	0.036	0.824	99.264	1.87358	0.974281	0.0106875	0.00327135	0.189745	0.821291	0.140542	0.00106733	0.0232447	4.03771	0.812327	1.72812	1.46863	1.95552	1082.55	1073.08	1094.21
700	Line 1 20MAL08b-28284_area11-line1	20MAL08b-28284	11	SLV	SLVa	49.23	23.94	0.22	0.075	6.51	14.22	4.04	0.03	1.014	99.328	1.84924	0.963404	0.0160211	0.00238595	0.204506	0.796318	0.178844	0.000890899	0.0286514	4.04026	0.795662	2.53123	2.3744	2.67587	1055.85	1050.66	1061.52
701	Line 2 20MAL08b-28284_area11-line1	20MAL08b-28284	11	SLV	SLVa	49.35	23.99	0.146	0.122	6.31	14.26	3.53	0.041	0.892	98.649	1.86446	0.970997	0.0106937	0.00390359	0.199369	0.803175	0.15717	0.0012246	0.0253499	4.03634	0.801137	2.72828	2.4752	2.88291	1073.08	1065.31	1081.26
702	Line 3 20MAL08b-28284_area11-line1	20MAL08b-28284	11	SLV	SLVa	50.78	24.3	0.124	0.107	5.64	14.83	2.71	0	0.669	99.17	1.89918	0.97365	0.00899093	0.0033892	0.176408	0.826876	0.119447	0	0.0188212	4.02677	0.82417	1.89945	1.67749	2.17283	1087.25	1078.03	1095.07
703	Line 4 20MAL08b-28284_area11-line1	20MAL08b-28284	11	SLV	SLVa	49.75	24.21	0.133	0.146	6.52	13.94	3.29	0	0.76	98.778	1.87874	0.979466	0.00973717	0.00466944	0.205913	0.784803	0.146419	0	0.021589	4.03133	0.792157	1.95117	1.72578	2.26033	1058.98	1051.73	1065.92
704	Line 5 20MAL08b-28284_area11-line1	20MAL08b-28284	11	SLV	SLVa	50.91	24.41	0.094	0.113	5.11	15.06	2.63	0.025	0.647	99.011	1.90276	0.977395	0.00681109	0.00357683	0.159722	0.839132	0.115842	0.000738696	0.0181899	4.02417	0.840095	1.75051	1.55623	1.9361	1096.82	1090.77	1102.07
705	Line 7 20MAL08b-28284_area11-line1	20MAL08b-28284	11	SLV	SLVa	49.77	24.35	0.128	0.135	6.24	14	3.41	0	0.756	98.803	1.87669	0.983662	0.00935714	0.00431119	0.196776	0.787005	0.151534	0	0.0214434	4.03078	0.79998	2.48442	2.14458	2.70302	1070.09	1061.32	1079.97
706	Line 8 20MAL08b-28284_area11-line1	20MAL08b-28284	11	SLV	SLVa	49.88	24.34	0.214	0.132	6.25	14.25	3.17	0	0.728	98.99	1.87842	0.981994	0.0156239	0.00420997	0.196838	0.800029	0.140688	0	0.0206226	4.03843	0.802543	1.57452	1.34321	1.75597	1056.51	1050.46	1063.03
707	Line 9 20MAL08b-28284_area11-line1	20MAL08b-28284	11	SLV	SLVa	49.82	24.3	0.166	0.141	6.68	13.93	3.1	0	0.674	98.831	1.88235	0.983616	0.0121594	0.00451186	0.211075	0.784645	0.138035	0	0.0191559	4.03555	0.788018	1.65356	1.47024	1.86635	1047.28	1041.81	1052.86
708	Line 11 20MAL08b-28284_area11-line1	20MAL08b-28284	11	SLV	SLVa	46.17	24.06	0.2	0.121	7.69	12.6	6.12	0	1.453	98.424	1.7686	0.987386	0.0148528	0.00392549	0.246354	0.719556	0.276281	0	0.0418679	4.05882	0.744952	1.95674	1.79961	2.12054	1056.58	1051.17	1061.84
709	Line 12 20MAL08b-28284_area11-line1	20MAL08b-28284	11	SLV	SLVa	46.39	24.22	0.182	0.083	7.09	12.98	5.97	0	1.432	98.359	1.77329	0.991864	0.0134876	0.00268703	0.226655	0.7397	0.268943	0	0.0411761	4.0578	0.765453	1.9708	1.82572	2.11674	1061.5	1055.7	1067.9
710	Line 13 20MAL08b-28284_area11-line1	20MAL08b-28284	11	SLV	SLVa	46.31	24.04	0.244	0.116	7.51	12.53	6.22	0	1.361	98.37	1.77305	0.986058	0.0181111	0.00376134	0.240464	0.715191	0.280651	0	0.0391968	4.05648	0.748378	2.0382	1.88662	2.19899	1057.95	1052.38	1063.75
711	Line 14 20MAL08b-28284_area11-line1	20MAL08b-28284	11	SLV	SLVa	46.66	24.15	0.206	0.108	7.57	12.38	5.85	0.024	1.379	98.341	1.78642	0.990556	0.0152903	0.00350189	0.242381	0.706619	0.263953	0.000726434	0.0397146	4.04917	0.744593	2.02467	1.89743	2.15498	1062.69	1057.03	1069.11
712	Line 1 20MAL08b-28284_area10-line1	20MAL08b-28284	10	SLV	SLVa	42.39	22.46	0.39	0.11	10	10.1	11.25	0.031	2.38	99.111	1.6279	0.924051	0.029036	0.00357763	0.321165	0.578243	0.509152	0.000941176	0.0687524	4.06282	0.642915	3.28502	2.5567	4.20351	1066.64	1055.46	1077.55
713	Line 3 20MAL08b-28284_area10-line1	20MAL08b-28284	10	SLV	SLVa	47.29	24.13	0.14	0.099	6.39	13.43	5.65	0.132	1.487	98.748	1.79131	0.979223	0.0102811	0.00317597	0.202426	0.758408	0.252221	0.00395295	0.0423701	4.04337	0.789323	2.10185	1.97338	2.25151	1073.8	1069.54	1079.06
714	Line 4 20MAL08b-28284_area10-line1	20MAL08b-28284	10	SLV	SLVa	48.52	24.24	0.121	0.082	5.79	14.05	4.85	0.104	1.26	99.038	1.82433	0.976421	0.00882016	0.00261117	0.182064	0.78756	0.214909	0.00309144	0.0356368	4.03544	0.812232	2.07368	1.97208	2.23749	1095.52	1087.8	1101.21
715	Line 5 20MAL08b-28284_area10-line1	20MAL08b-28284	10	SLV	SLVa	47.74	24.34	0.149	0.058	6.25	13.7	4.73	0.072	1.167	98.206	1.81747	0.992724	0.0109972	0.00187005	0.198989	0.777556	0.212216	0.00216702	0.0334197	4.04741	0.796231	2.22486	2.0617	2.39161	1071.99	1065.98	1079.43
716	Line 6 20MAL08b-28284_area10-line1	20MAL08b-28284	10	SLV	SLVa	47.21	24.32	0.159	0.087	6.59	13.33	5.37	0.032	1.336	98.437	1.79703	0.991759	0.0117335	0.00280465	0.209783	0.756442	0.240893	0.000962976	0.0382537	4.04966	0.782884	2.20043	2.09407	2.32	1075.95	1066.83	1083.49
717	Line 7 20MAL08b-28284_area10-line1	20MAL08b-28284	10	SLV	SLVa	47.01	24.14	0.139	0.122	6.53	13.2	5.42	0.075	1.426	98.103	1.7957	0.987877	0.0102936	0.00394677	0.208603	0.751696	0.24399	0.0022649	0.0409741	4.04535	0.782773	2.18484	2.03207	2.3339	1066.54	1060.23	1072.76
718	Line 9 20MAL08b-28284_area10-line1	20MAL08b-28284	10	SLV	SLVa	47.26	24.43	0.166	0.074	6.47	13.31	5.26	0	1.361	98.35	1.8002	0.996949	0.0122587	0.00238725	0.206108	0.755841	0.236126	0	0.0389971	4.04887	0.785739	2.10312	1.99883	2.21588	1077.56	1070.07	1084.37
719	Line 10 20MAL08b-28284_area10-line1	20MAL08b-28284	10	SLV	SLVa	46.73	24.21	0.16	0.086	6.84	13.17	5.75	0.038	1.432	98.43	1.78197	0.989054	0.0118286	0.00277741	0.218134	0.748711	0.258405	0.0011456	0.0410764	4.0531	0.774386	2.1091	1.99707	2.22003	1066.91	1060.86	1074.78
720	Line 11 20MAL08b-28284_area10-line1	20MAL08b-28284	10	SLV	SLVa	47.02	24.27	0.114	0.098	6.8	13.08	5.6	0	1.463	98.445	1.79099	0.990381	0.00841829	0.00316137	0.216612	0.742751	0.251379	0	0.0419181	4.04561	0.774212	2.10563	2.01272	2.19929	1077.65	1071.04	1084.93
721	Line 12 20MAL08b-28284_area10-line1	20MAL08b-28284	10	SLV	SLVa	48.14	24.18	0.203	0.101	6.31	13.72	4.88	0.048	0.981	98.565	1.82397	0.981501	0.0149114	0.00324095	0.199943	0.774982	0.217903	0.0014378	0.0279594	4.04585	0.794915	2.21653	2.11179	2.35026	1064.69	1059.37	1070.47
722	Line 13 20MAL08b-28284_area10-line1	20MAL08b-28284	10	SLV	SLVa	47.28	24.26	0.171	0.092	6.63	13.27	5.64	0.066	1.353	98.775	1.79311	0.985693	0.0125728	0.00295499	0.210284	0.750282	0.25208	0.00197887	0.0385987	4.04755	0.781083	2.13534	2.00654	2.27122	1060.42	1054.1	1067.09
723	Line 2 20MAL08b-28284_area12-line1	20MAL08b-28284	12	SLV	SLVa	47.92	24.34	0.152	0.098	5.86	13.92	4.86	0.092	1.17	98.425	1.81676	0.988605	0.011172	0.00314663	0.185798	0.786764	0.217143	0.00275748	0.0333666	4.04551	0.80896	2.16438	2.02585	2.28084	1082.73	1074.35	1090.69
724	Line 3 20MAL08b-28284_area12-line1	20MAL08b-28284	12	SLV	SLVa	48.67	24.27	0.124	0.093	5.7	14.16	4.7	0.118	1.125	98.972	1.83018	0.977743	0.00903989	0.00296179	0.179255	0.793818	0.208286	0.003508	0.0318223	4.03662	0.815785	2.38331	2.23483	2.52327	1097.32	1089.85	1102.92
725	Line 4 20MAL08b-28284_area12-line1	20MAL08b-28284	12	SLV	SLVa	48.48	24.27	0.165	0.094	5.75	14.15	4.61	0.167	1.066	98.754	1.82879	0.980831	0.0120669	0.00300309	0.181399	0.795763	0.204943	0.00498039	0.0302486	4.04203	0.814362	2.49147	2.34147	2.67087	1078.6	1071.11	1085.81
726	Line 5 20MAL08b-28284_area12-line1	20MAL08b-28284	12	SLV	SLVa	48.52	24.3	0.13	0.086	5.81	13.99	4.79	0.151	1.119	98.897	1.82729	0.980428	0.00949159	0.00274299	0.18299	0.785471	0.212595	0.00449582	0.0317003	4.03721	0.811051	2.42446	2.23967	2.56786	1090.63	1083.05	1097.37
727	Line 6 20MAL08b-28284_area12-line1	20MAL08b-28284	12	SLV	SLVa	48.36	24.28	0.128	0.094	5.94	13.99	4.92	0.147	1.152	99.016	1.82073	0.979333	0.00934282	0.00299727	0.187029	0.78524	0.218301	0.00437544	0.0326256	4.03998	0.807636	2.3607	2.18537	2.51509	1089.44	1082.16	1097.04
728	Line 7 20MAL08b-28284_area12-line1	20MAL08b-28284	12	SLV	SLVa	48.51	24.29	0.158	0.089	5.72	14.07	4.58	0.122	1.068	98.631	1.83197	0.982735	0.0115678	0.00284653	0.180654	0.792147	0.203837	0.00364243	0.0303392	4.03974	0.814295	2.45667	2.31014	2.59655	1083.76	1076.55	1090.56
729	Line 8 20MAL08b-28284_area12-line1	20MAL08b-28284	12	SLV	SLVa	48.56	24.34	0.163	0.072	5.85	14.09	4.83	0.16	1.165	99.241	1.82335	0.979116	0.0118655	0.00228962	0.183701	0.788728	0.213732	0.00474959	0.0329051	4.04044	0.811091	2.28524	2.08728	2.48479	1079.98	1073.67	1087.32
730	Line 9 20MAL08b-28284_area12-line1	20MAL08b-28284	12	SLV	SLVa	47.69	24.16	0.166	0.133	6.15	13.94	5.32	0.115	1.234	98.923	1.80122	0.977591	0.012155	0.00425431	0.194257	0.784921	0.236799	0.00343385	0.035059	4.04969	0.801612	2.39851	2.2152	2.57375	1063.25	1056.92	1070.01
731	Line 4 20MAL08b-28284_area13-line1	20MAL08b-28284	13	SLV	SLVa	44.6	23.66	0.283	0.115	8.46	11.27	8.04	0	2.1	98.531	1.71354	0.973858	0.0210792	0.00374193	0.271827	0.645517	0.364037	0	0.0606911	4.05429	0.70368	1.44971	1.05682	1.8747	1076.39	1070.64	1082.22
732	Line 5 20MAL08b-28284_area13-line1	20MAL08b-28284	13	SLV	SLVa	47.69	23.9	0.168	0.073	6.72	13.25	5.36	0.051	1.182	98.407	1.8122	0.972968	0.0123765	0.00234931	0.213556	0.750619	0.240034	0.00153212	0.0337864	4.03942	0.778509	2.2804	2.1198	2.41641	1059.11	1054.14	1065.64
733	Line 6 20MAL08b-28284_area13-line1	20MAL08b-28284	13	SLV	SLVa	49.37	24.49	0.179	0.082	5.93	13.9	4.25	0.046	0.899	99.165	1.85344	0.984979	0.013028	0.00260717	0.186181	0.777958	0.188034	0.00136527	0.0253876	4.03298	0.806894	2.99363	2.78618	3.18053	1076.45	1068.01	1085.5
734	Line 7 20MAL08b-28284_area13-line1	20MAL08b-28284	13	SLV	SLVa	49.52	24.46	0.191	0.076	5.83	14.03	4.2	0.044	0.864	99.248	1.85627	0.98229	0.0138804	0.00241276	0.182765	0.78405	0.185541	0.00130394	0.0243625	4.03288	0.810962	2.95111	2.76036	3.14104	1077.3	1069.24	1085.14
735	Line 8 20MAL08b-28284_area13-line1	20MAL08b-28284	13	SLV	SLVa	49.76	24.38	0.129	0.085	5.7	14.17	4.07	0.056	0.857	99.207	1.86276	0.97776	0.00936213	0.00269485	0.178449	0.790808	0.179556	0.00165733	0.0241326	4.02718	0.815891	3.48211	3.37037	3.55426	1104.05	1092.6	1112.69
736	Line 9 20MAL08b-28284_area13-line1	20MAL08b-28284	13	SLV	SLVa	49.61	24.39	0.187	0.065	5.59	14.34	3.93	0.083	0.828	99.041	1.86118	0.980287	0.013601	0.00206525	0.175386	0.802036	0.173757	0.00246174	0.0233666	4.03414	0.820563	2.91098	2.7416	3.05879	1078.31	1072.04	1084.64
737	Line 10 20MAL08b-28284_area13-line1	20MAL08b-28284	13	SLV	SLVa	49.33	24.37	0.135	0.064	5.69	14.04	4.13	0.046	0.838	98.647	1.85848	0.983614	0.00986028	0.00204205	0.179276	0.788568	0.18337	0.00137009	0.0237486	4.03033	0.814767	3.42224	3.29496	3.50976	1099.2	1088.53	1108.07
738	Line 11 20MAL08b-28284_area13-line1	20MAL08b-28284	13	SLV	SLVa	49.09	24.37	0.195	0.047	5.9	14.08	4.28	0.04	0.877	98.886	1.8481	0.982899	0.0142323	0.00149854	0.185758	0.79024	0.189891	0.00119052	0.0248358	4.03864	0.809674	2.75094	2.54797	2.94693	1069.92	1062.58	1077.44
739	Line 12 20MAL08b-28284_area13-line1	20MAL08b-28284	13	SLV	SLVa	48.88	24.26	0.186	0.109	6.17	13.86	4.45	0.023	0.893	98.846	1.84357	0.980258	0.0136003	0.00348171	0.194615	0.77932	0.197796	0.000685804	0.0253353	4.03866	0.800177	2.62795	2.445	2.81093	1072.06	1064.11	1080.61
740	Line 13 20MAL08b-28284_area13-line1	20MAL08b-28284	13	SLV	SLVa	48.69	24.25	0.165	0.125	6.36	13.6	4.72	0	0.966	98.906	1.83717	0.980263	0.0120698	0.00399446	0.200692	0.76502	0.209885	0	0.0274178	4.03651	0.792182	2.6414	2.49506	2.78307	1067.58	1061.64	1074.49
741	Line 14 20MAL08b-28284_area13-line1	20MAL08b-28284	13	SLV	SLVa	48.57	24.37	0.206	0.067	6.27	13.63	4.67	0.022	0.962	98.801	1.83517	0.986476	0.0150898	0.00214399	0.198125	0.767768	0.207949	0.000657169	0.027342	4.04073	0.794879	2.24136	2.12295	2.3963	1068.14	1062.46	1075.12
742	Line 15 20MAL08b-28284_area13-line1	20MAL08b-28284	13	SLV	SLVa	48.92	24.27	0.146	0.098	6.27	13.62	4.42	0.026	0.931	98.724	1.84767	0.982044	0.0106906	0.00313476	0.198048	0.766904	0.196739	0.00077635	0.0264506	4.03246	0.794759	2.92408	2.758	3.11641	1079.44	1072.1	1088.88
743	Line 16 20MAL08b-28284_area13-line1	20MAL08b-28284	13	SLV	SLVa	49.11	24.3	0.199	0.063	6.08	13.94	4.38	0.048	0.903	99.032	1.84712	0.979157	0.0145106	0.0020068	0.191246	0.781649	0.194146	0.00142728	0.0255481	4.03681	0.803426	2.61855	2.4527	2.8148	1065.31	1058.58	1073.04
744	Line 17 20MAL08b-28284_area13-line1	20MAL08b-28284	13	SLV	SLVa	48.78	24.2	0.148	0.101	5.97	13.79	4.63	0.068	0.999	98.686	1.84036	0.978131	0.0108251	0.00322716	0.188364	0.77562	0.20586	0.00202821	0.0283512	4.03276	0.804598	2.61142	2.46329	2.79772	1081.54	1073.44	1090.88
745	Line 18 20MAL08b-28284_area13-line1	20MAL08b-28284	13	SLV	SLVa	48.38	24.3	0.153	0.066	5.88	13.61	4.82	0.118	1.16	98.504	1.83014	0.984798	0.0112207	0.00211447	0.18602	0.767542	0.21488	0.00352895	0.0330083	4.03326	0.804921	2.15746	1.98823	2.3136	1080.38	1073.38	1087.56
746	Line 19 20MAL08b-28284_area13-line1	20MAL08b-28284	13	SLV	SLVa	49.37	24.36	0.162	0.101	5.44	14.09	4.24	0.092	0.986	98.84	1.85459	0.980354	0.011798	0.00321325	0.170902	0.789078	0.187707	0.00273223	0.0278617	4.02823	0.821974	2.87683	2.70108	3.04161	1085.08	1078.53	1091.55
747	Line 20 20MAL08b-28284_area13-line1	20MAL08b-28284	13	SLV	SLVa	47.7	24.25	0.199	0.108	6.4	13.18	5.5	0.094	1.44	98.885	1.80379	0.982429	0.0145891	0.00345884	0.2024	0.743033	0.24511	0.00281022	0.0409616	4.03858	0.785918	1.9415	1.8065	2.09836	1060.95	1054.81	1067.43
748	Line 21 20MAL08b-28284_area13-line1	20MAL08b-28284	13	SLV	SLVa	47.58	24.3	0.145	0.102	6.46	13.21	5.53	0.072	1.375	98.806	1.80175	0.985821	0.010645	0.00327121	0.204581	0.745757	0.246789	0.0021555	0.0391669	4.03993	0.784728	2.17148	2.0342	2.29921	1068.14	1061.6	1075.32
749	Line 22 20MAL08b-28284_area13-line1	20MAL08b-28284	13	SLV	SLVa	47.51	24.2	0.171	0.091	6.47	13.11	5.48	0.087	1.403	98.549	1.80366	0.984251	0.0125856	0.00292583	0.205417	0.741987	0.245177	0.00261116	0.0400657	4.03868	0.783179	2.06563	1.92756	2.20397	1064.4	1057.35	1070.75
750	Line 1 20MAl09a-28307-area21B-1	20MAL09a-28307	21B	SLV	SLVa	50.18	24.66	0.166	0.115	5.7	13.7	3.88	0.085	0.638	99.125	1.88001	0.989795	0.0120572	0.00364894	0.178595	0.765201	0.171314	0.00251764	0.0179803	4.02112	0.81077	2.94859	2.76883	3.10742	1071.14	1063.18	1080
751	Line 2 20MAl09a-28307-area21B-1	20MAL09a-28307	21B	SLV	SLVa	49.76	24.67	0.054	0.141	5.84	13.88	4.09	0.09	0.668	99.196	1.86554	0.990865	0.00392487	0.00447694	0.183105	0.775778	0.180708	0.00266754	0.0188385	4.0259	0.809044	3.19686	3.08451	3.30762	1083.56	1073.63	1093.2
752	Line 3 20MAl09a-28307-area21B-1	20MAL09a-28307	21B	SLV	SLVa	49.97	24.66	0.242	0.085	5.77	14.07	3.92	0.14	0.641	99.497	1.86773	0.987459	0.0175359	0.00269068	0.180361	0.784012	0.172671	0.00413692	0.0180222	4.03462	0.812976	2.3733	2.22743	2.53875	1067.47	1061.97	1072.32
753	Line 4 20MAl09a-28307-area21B-1	20MAL09a-28307	21B	SLV	SLVa	50.08	24.57	0.163	0.104	5.82	14.03	4.06	0.077	0.666	99.574	1.86886	0.98229	0.0117926	0.00328689	0.181635	0.78054	0.178554	0.00227169	0.0186953	4.02793	0.811225	3.03965	2.87545	3.18679	1076.49	1067.68	1085.76
754	Line 5 20MAl09a-28307-area21B-1	20MAL09a-28307	21B	SLV	SLVa	50.01	24.35	0.132	0.116	5.67	14.05	3.9	0.105	0.646	98.979	1.87524	0.978185	0.00959583	0.00368381	0.177806	0.785419	0.172343	0.00311268	0.0182213	4.02361	0.815405	3.0005	2.84263	3.11481	1082.57	1073.31	1091.25
755	Line 6 20MAl09a-28307-area21B-1	20MAL09a-28307	21B	SLV	SLVa	49.29	24.58	0.181	0.113	5.79	13.91	3.93	0.098	0.687	98.579	1.86163	0.994576	0.0132532	0.00361453	0.182884	0.783225	0.174927	0.00292621	0.0195181	4.03655	0.8107	2.75137	2.59035	2.92076	1068.71	1062.01	1076.08
756	Line 7 20MAl09a-28307-area21B-1	20MAL09a-28307	21B	SLV	SLVa	50.25	24.72	0.251	0.056	5.8	13.95	3.83	0.099	0.703	99.683	1.87422	0.987768	0.0181496	0.00176893	0.180916	0.775682	0.16835	0.0029192	0.0197236	4.0295	0.810876	2.43846	2.28968	2.59805	1064.72	1059.27	1069.45
757	Line 8 20MAl09a-28307-area21B-1	20MAL09a-28307	21B	SLV	SLVa	48.54	24.55	0.256	0.055	6.09	13.65	4.69	0.063	0.815	98.716	1.83504	0.994306	0.0187627	0.00176095	0.192543	0.769315	0.208953	0.00188292	0.0231766	4.04574	0.799822	2.23228	2.11789	2.36101	1061.28	1055.9	1068.21
758	Line 9 20MAl09a-28307-area21B-1	20MAL09a-28307	21B	SLV	SLVa	48.19	24.5	0.229	0.069	6.5	13.13	4.96	0.059	0.881	98.528	1.82905	0.996225	0.0168505	0.00221798	0.206322	0.742949	0.221861	0.00177038	0.0251531	4.0424	0.782652	2.18105	2.08747	2.29944	1058.05	1053.36	1062.94
759	Line 10 20MAl09a-28307-area21B-1	20MAL09a-28307	21B	SLV	SLVa	48.18	24.36	0.125	0.089	6.29	13.38	4.77	0.052	0.816	98.121	1.83446	0.993667	0.00922699	0.00286993	0.200289	0.759491	0.214038	0.00156527	0.023371	4.03898	0.791318	2.8186	2.68845	2.96536	1079.96	1074.33	1087.48
760	Line 11 20MAl09a-28307-area21B-1	20MAL09a-28307	21B	SLV	SLVa	48.59	24.41	0.209	0.151	6.56	12.94	5.23	0.056	0.957	99.103	1.83139	0.985653	0.0152718	0.00482003	0.206777	0.727099	0.232309	0.00166866	0.0271327	4.03212	0.778582	2.26735	2.17847	2.36186	1054.85	1049.53	1061.37
761	Line 12 20MAl09a-28307-area21B-1	20MAL09a-28307	21B	SLV	SLVa	48	24.47	0.153	0.053	6.65	13.17	5.13	0.132	0.921	98.679	1.82031	0.994169	0.0112487	0.00170223	0.210906	0.744586	0.229272	0.00395752	0.026273	4.04243	0.77927	2.51267	2.36908	2.7114	1067.52	1063.45	1071.51
762	Line 13 20MAl09a-28307-area21B-1	20MAL09a-28307	21B	SLV	SLVa	47.99	24.28	0.196	0.074	6.37	13.21	5.33	0.13	0.911	98.55	1.81996	0.986465	0.0144104	0.00237674	0.202029	0.746859	0.238215	0.00389762	0.0259882	4.0402	0.787089	2.45194	2.268	2.64202	1065.14	1060.53	1070.33
763	Line 14 20MAl09a-28307-area21B-1	20MAL09a-28307	21B	SLV	SLVa	48.3	24.57	0.156	0.075	6.39	13.23	5.01	0.08	0.888	98.698	1.82848	0.996486	0.0114492	0.00240461	0.202306	0.74667	0.223518	0.0023943	0.0252873	4.039	0.786817	2.37881	2.27744	2.48875	1069.12	1064.24	1074.02
764	Line 15 20MAl09a-28307-area21B-1	20MAL09a-28307	21B	SLV	SLVa	48.47	24.31	0.215	0.107	6.54	13.3	5.13	0.101	0.908	99.081	1.82751	0.981959	0.0157157	0.00341672	0.206219	0.747589	0.227947	0.0030106	0.0257524	4.03912	0.783794	2.07141	1.95566	2.20961	1057.22	1052.29	1062.26
765	Line 16 20MAl09a-28307-area21B-1	20MAL09a-28307	21B	SLV	SLVa	48.59	24.37	0.184	0.043	6.27	13.21	4.81	0.075	0.838	98.396	1.84178	0.989617	0.0135212	0.00138038	0.198756	0.746479	0.214865	0.00224748	0.0238935	4.03254	0.789728	2.36056	2.23366	2.5208	1060.3	1056.23	1065.56
766	Line 17 20MAl09a-28307-area21B-1	20MAL09a-28307	21B	SLV	SLVa	48.65	24.37	0.192	0.112	6.29	13.25	4.66	0.052	0.846	98.456	1.84426	0.989729	0.0141107	0.0035958	0.199413	0.748824	0.208188	0.00155843	0.0241243	4.0338	0.789701	2.52577	2.37891	2.69001	1061.95	1057.04	1067.75
767	Line 18 20MAl09a-28307-area21B-1	20MAL09a-28307	21B	SLV	SLVa	49.06	24.51	0.17	0.124	6.19	13.48	4.53	0.08	0.751	98.979	1.84953	0.98992	0.0124249	0.00395909	0.195159	0.757617	0.201263	0.00238435	0.0212971	4.03356	0.795168	2.62043	2.44153	2.79811	1061.57	1056.14	1068.06
768	Line 19 20MAl09a-28307-area21B-1	20MAL09a-28307	21B	SLV	SLVa	50.11	24.73	0.124	0.076	5.74	14.08	3.5	0.066	0.636	99.082	1.88016	0.99407	0.00901988	0.00241503	0.180113	0.787586	0.154764	0.00195776	0.0179504	4.02804	0.813875	2.72794	2.51499	2.89177	1090.41	1082.39	1098.37
769	Line 20 20MAl09a-28307-area21B-1	20MAL09a-28307	21B	SLV	SLVa	50.2	24.76	0.153	0.091	5.63	14.09	3.35	0.042	0.608	98.923	1.88542	0.996271	0.0111405	0.00289458	0.176839	0.788935	0.148279	0.00124709	0.0171773	4.02821	0.816894	2.40878	2.20142	2.64596	1085.68	1078.74	1092.38
770	Line 21 20MAl09a-28307-area21B-1	20MAL09a-28307	21B	SLV	SLVa	51.14	24.57	0.203	0.121	5.71	14.06	3.27	0.064	0.569	99.735	1.9017	0.978832	0.0146348	0.0038107	0.177575	0.779456	0.143304	0.00188151	0.0159162	4.01711	0.814452	2.07899	1.90873	2.27047	1063.66	1058.32	1068.56
771	Line 22 20MAl09a-28307-area21B-1	20MAL09a-28307	21B	SLV	SLVa	51.25	24.8	0.299	0.096	5.69	14.05	3.1	0.041	0.545	99.913	1.90411	0.987122	0.0215366	0.0030207	0.176796	0.778213	0.135734	0.00120428	0.0152314	4.02296	0.814875	1.74863	1.61817	1.91799	1065.99	1061.09	1070.21
772	Line 23 20MAl09a-28307-area21B-1	20MAL09a-28307	21B	SLV	SLVa	50.96	24.83	0.229	0.064	5.57	13.82	3.12	0	0.578	99.171	1.90572	0.994782	0.0166025	0.00202697	0.1742	0.770481	0.137504	0	0.0162593	4.01757	0.815599	2.0937	1.94576	2.23631	1072.78	1067.95	1077.44
773	Line 24 20MAl09a-28307-area21B-1	20MAL09a-28307	21B	SLV	SLVa	51.43	24.65	0.135	0.15	5.84	14.07	3.11	0.041	0.576	100.016	1.90718	0.979298	0.0097055	0.00471092	0.181114	0.777848	0.135915	0.001202	0.0160674	4.01304	0.811135	2.06291	1.94094	2.17059	1070.73	1062.51	1078.83
774	Line 25 20MAl09a-28307-area21B-1	20MAL09a-28307	21B	SLV	SLVa	51	24.76	0.164	0.065	5.47	14.08	3.19	0	0.562	99.336	1.9031	0.989839	0.0118644	0.00205421	0.170704	0.783285	0.140286	0	0.0157752	4.01691	0.821063	2.39093	2.26243	2.54807	1085.08	1079.4	1089.75
775	Line 26 20MAl09a-28307-area21B-1	20MAL09a-28307	21B	SLV	SLVa	51.12	24.76	0.264	0.138	5.6	14.2	3.03	0.057	0.558	99.727	1.90208	0.986984	0.0190436	0.00434866	0.174257	0.787682	0.132865	0.00167671	0.0156177	4.02455	0.818848	1.88056	1.72807	2.03135	1057.3	1053.2	1062.17
776	Line 27 20MAl09a-28307-area21B-1	20MAL09a-28307	21B	SLV	SLVa	50.87	24.74	0.123	0.038	5.73	13.83	3.43	0.039	0.539	99.368	1.899	0.98943	0.00890178	0.0012014	0.178888	0.769681	0.150899	0.00115099	0.0151356	4.01429	0.811413	2.63266	2.41251	2.78097	1082.8	1075.45	1090.72
777	Line 28 20MAl09a-28307-area21B-1	20MAL09a-28307	21B	SLV	SLVa	50.41	24.6	0.2	0.096	5.9	13.74	3.95	0.062	0.614	99.612	1.88041	0.98309	0.0144635	0.00303282	0.184057	0.764096	0.173645	0.00182841	0.0172286	4.02185	0.805879	2.81607	2.67717	2.95504	1066.91	1059.04	1074.67
778	Line 1 20MAl09a-28307-area20C	20MAL09a-28307	20C	SLV	SLVa	50.04	24.15	0.193	0.074	6.06	13.74	3.54	0.111	0.709	98.617	1.88581	0.975033	0.0141009	0.00236184	0.190993	0.771955	0.157222	0.00330711	0.0200989	4.02088	0.801658	2.1384	1.93721	2.28692	1061.85	1055.77	1068.36
779	Line 2 20MAl09a-28307-area20C	20MAL09a-28307	20C	SLV	SLVa	50.31	24.26	0.167	0.067	5.92	13.78	3.53	0.127	0.703	98.865	1.88932	0.976032	0.0121584	0.00213091	0.185924	0.771481	0.156227	0.00377051	0.0198588	4.0169	0.805804	2.20399	2.00168	2.37561	1068.34	1061.63	1075.86
780	Line 3 20MAl09a-28307-area20C	20MAL09a-28307	20C	SLV	SLVa	50.19	24.32	0.177	0.078	5.9	13.74	3.62	0.076	0.704	98.805	1.88638	0.97926	0.0128972	0.00248282	0.185451	0.769882	0.160343	0.00225824	0.0199036	4.01886	0.805879	2.58335	2.40058	2.77466	1071.47	1063.58	1079.79
781	Line 4 20MAl09a-28307-area20C	20MAL09a-28307	20C	SLV	SLVa	50	24.55	0.137	0.108	6.06	13.8	3.97	0.105	0.755	99.489	1.8698	0.983555	0.0099324	0.00342048	0.189523	0.769359	0.174963	0.00310427	0.0212382	4.02489	0.80235	3.00041	2.8905	3.09701	1073.85	1065.99	1082.91
782	Line 5 20MAl09a-28307-area20C	20MAL09a-28307	20C	SLV	SLVa	49.91	24.2	0.157	0.078	5.99	13.6	3.61	0.077	0.727	98.35	1.88558	0.97948	0.0114992	0.0024957	0.189256	0.765988	0.160729	0.00229982	0.0206604	4.01799	0.801877	2.64215	2.46446	2.82975	1071.01	1063.65	1079.78
783	Line 6 20MAl09a-28307-area20C	20MAL09a-28307	20C	SLV	SLVa	50.16	24.13	0.149	0.076	5.94	13.82	3.56	0.071	0.724	98.63	1.88788	0.97296	0.010872	0.00242253	0.186967	0.775441	0.157905	0.00211261	0.0204975	4.01705	0.80573	2.71105	2.5043	2.87743	1077.24	1068.56	1086.26
784	Line 7 20MAl09a-28307-area20C	20MAL09a-28307	20C	SLV	SLVa	50.59	24.48	0.2	0.087	5.84	14.12	3.62	0.092	0.701	99.745	1.88334	0.976332	0.0144345	0.00274298	0.18182	0.783653	0.158819	0.00270768	0.0196304	4.02348	0.811678	2.37335	2.22057	2.5425	1068.76	1062.38	1074.84
785	Line 8 20MAl09a-28307-area20C	20MAL09a-28307	20C	SLV	SLVa	50.64	24.54	0.165	0.063	5.93	14.04	3.63	0.085	0.706	99.799	1.88423	0.978222	0.0119024	0.00198527	0.184527	0.778813	0.159176	0.00250037	0.0197602	4.02112	0.808451	2.58378	2.413	2.77378	1073.8	1066.61	1081.72
786	Line 9 20MAl09a-28307-area20C	20MAL09a-28307	20C	SLV	SLVa	50.33	24.51	0.162	0.091	5.94	13.93	3.83	0.083	0.738	99.614	1.87721	0.979381	0.0117141	0.00287453	0.185283	0.774573	0.168351	0.00244742	0.0207056	4.02254	0.806968	2.95042	2.75523	3.10316	1075.48	1067.23	1084.06
787	Line 10 20MAl09a-28307-area20C	20MAL09a-28307	20C	SLV	SLVa	50.69	24.52	0.136	0.07	5.93	14.1	3.75	0.064	0.725	99.991	1.88187	0.975238	0.00978848	0.00220092	0.184114	0.780391	0.16407	0.00187842	0.0202466	4.0198	0.80911	3.16883	2.97885	3.3362	1088.26	1077.5	1097.66
788	Line 11 20MAl09a-28307-area20C	20MAL09a-28307	20C	SLV	SLVa	50.98	24.57	0.165	0.096	5.79	14.37	3.3	0.02	0.637	99.946	1.89277	0.977292	0.0118765	0.00301861	0.179779	0.795388	0.144391	0.000587046	0.0177903	4.02289	0.815643	2.19599	2.041	2.42245	1086.59	1076.77	1094.74
789	Line 12 20MAl09a-28307-area20C	20MAL09a-28307	20C	SLV	SLVa	50.63	24.45	0.195	0.078	5.89	14.11	3.59	0.053	0.677	99.672	1.88569	0.975578	0.0140801	0.00246034	0.18346	0.783454	0.157575	0.00156057	0.0189669	4.02282	0.810263	2.57575	2.43211	2.73711	1073.27	1065.8	1080.48
790	Line 13 20MAl09a-28307-area20C	20MAL09a-28307	20C	SLV	SLVa	50.19	24.31	0.179	0.092	6.1	13.8	3.86	0.082	0.751	99.364	1.87742	0.974208	0.0129809	0.00291455	0.190826	0.769571	0.170162	0.00242495	0.0211315	4.02164	0.801305	2.81563	2.61796	2.98491	1066.2	1058.89	1074.36
791	Line 14 20MAl09a-28307-area20C	20MAL09a-28307	20C	SLV	SLVa	50.39	24.44	0.178	0.076	6.05	13.91	3.89	0.122	0.749	99.804	1.8762	0.974894	0.0128488	0.00239655	0.188388	0.772122	0.170692	0.00359119	0.0209779	4.02211	0.803867	2.68627	2.50376	2.83366	1067.68	1060.93	1074.55
792	Line 15 20MAl09a-28307-area20C	20MAL09a-28307	20C	SLV	SLVa	50.43	24.57	0.181	0.112	5.94	13.87	3.8	0.111	0.737	99.754	1.87873	0.980622	0.0130726	0.00353371	0.185065	0.770328	0.166835	0.00326921	0.0206532	4.0221	0.806294	2.66306	2.45468	2.83779	1066.36	1060.06	1073.92
793	Line 16 20MAl09a-28307-area20C	20MAL09a-28307	20C	SLV	SLVa	50.48	24.57	0.205	0.084	5.98	13.97	3.8	0.084	0.736	99.931	1.87769	0.979111	0.0147831	0.0026462	0.186024	0.774686	0.166578	0.00247018	0.0205934	4.02458	0.806368	2.58696	2.42693	2.7534	1067.21	1059.76	1073.84
794	Line 17 20MAl09a-28307-area20C	20MAL09a-28307	20C	SLV	SLVa	50.41	24.46	0.182	0.082	5.98	13.92	3.69	0.119	0.722	99.566	1.88127	0.977943	0.0131678	0.00259172	0.186638	0.77446	0.16229	0.00351097	0.0202684	4.02214	0.805808	2.40194	2.20715	2.60707	1068.43	1062.05	1075.07
795	Line 18 20MAl09a-28307-area20C	20MAL09a-28307	20C	SLV	SLVa	49.67	24.58	0.184	0.093	5.81	13.86	4.13	0.101	0.701	99.129	1.86347	0.987945	0.013383	0.00295495	0.182292	0.775206	0.182603	0.00299568	0.019783	4.03064	0.809616	2.66212	2.5011	2.83423	1070.21	1063.57	1076.58
796	Line 19 20MAl09a-28307-area20C	20MAL09a-28307	20C	SLV	SLVa	49.52	24.53	0.17	0.078	5.79	13.86	4.13	0.095	0.729	98.901	1.86205	0.988169	0.0123928	0.00248396	0.182077	0.776962	0.183017	0.0028241	0.0206199	4.0306	0.810147	2.80808	2.64409	2.954	1074.25	1066.37	1081.96
797	Line 20 20MAl09a-28307-area20C	20MAL09a-28307	20C	SLV	SLVa	49.87	24.55	0.21	0.078	5.84	13.88	4.07	0.052	0.723	99.289	1.86742	0.984866	0.0152451	0.00247364	0.182886	0.774851	0.179609	0.0015394	0.0203652	4.02926	0.809044	2.82189	2.68211	2.95507	1071.19	1062.98	1078.53
798	Line 21 20MAl09a-28307-area20C	20MAL09a-28307	20C	SLV	SLVa	49.2	24.62	0.165	0.074	5.87	13.95	4.08	0.106	0.731	98.814	1.85494	0.994431	0.0120603	0.00236285	0.185083	0.784086	0.181282	0.00315948	0.0207314	4.03814	0.809029	2.84334	2.70647	2.9731	1074.2	1066.96	1082.51
799	Line 22 20MAl09a-28307-area20C	20MAL09a-28307	20C	SLV	SLVa	49.87	24.66	0.183	0.087	5.85	13.89	4.14	0.084	0.726	99.491	1.86406	0.987499	0.0132611	0.0027541	0.182869	0.774014	0.182369	0.00248225	0.0204129	4.02973	0.808891	2.77818	2.61221	2.94542	1071.66	1064.72	1078.71
800	Line 1 20MAl09a-28307-area20B-1	20MAL09a-28307	20B	SLV	SLVa	49.43	24.73	0.173	0.082	5.75	13.86	4.12	0	0.721	98.869	1.86025	0.997071	0.0126222	0.00261356	0.180972	0.777621	0.182729	0	0.0204109	4.03429	0.811211	3.1655	2.98128	3.34098	1087.67	1077.82	1097.9
801	Line 2 20MAl09a-28307-area20B-1	20MAL09a-28307	20B	SLV	SLVa	49.31	24.69	0.177	0.097	5.77	13.81	4.13	0	0.721	98.712	1.8593	0.997375	0.0129389	0.0030976	0.181951	0.776308	0.183525	0	0.0204502	4.03495	0.810123	3.12695	2.94812	3.30665	1087.68	1078.31	1098.02
802	Line 3 20MAl09a-28307-area20B-1	20MAL09a-28307	20B	SLV	SLVa	49.65	24.69	0.174	0.138	5.66	13.89	3.95	0.025	0.707	98.884	1.86709	0.994691	0.0126854	0.00439504	0.178002	0.778704	0.175054	0.000743242	0.0199991	4.03136	0.813943	3.19473	3.01472	3.34003	1084.01	1073.54	1093.87
803	Line 4 20MAl09a-28307-area20B-1	20MAL09a-28307	20B	SLV	SLVa	49.75	24.72	0.149	0.091	5.8	13.81	4.23	0	0.719	99.278	1.86326	0.991863	0.0108187	0.00288643	0.181666	0.771081	0.186703	0	0.0202561	4.02854	0.809324	3.30256	3.15264	3.43951	1094.54	1082.77	1106.9
804	Line 5 20MAl09a-28307-area20B-1	20MAL09a-28307	20B	SLV	SLVa	49.68	24.65	0.228	0.079	5.89	13.76	4.17	0.029	0.721	99.207	1.86316	0.990393	0.0165772	0.0025092	0.184734	0.769329	0.184304	0.000859828	0.02034	4.03221	0.806371	2.67565	2.52626	2.81083	1072.04	1062.3	1080.85
805	Line 6 20MAl09a-28307-area20B-1	20MAL09a-28307	20B	SLV	SLVa	49.87	24.74	0.184	0.056	5.8	13.86	4.1	0.022	0.687	99.331	1.86673	0.992118	0.0133527	0.00177529	0.181565	0.773446	0.180865	0.000651042	0.0193439	4.02985	0.809881	2.96696	2.80462	3.15207	1079.98	1070.17	1089.4
806	Line 7 20MAl09a-28307-area20B-1	20MAL09a-28307	20B	SLV	SLVa	49.59	24.71	0.226	0.072	5.7	14.08	3.98	0	0.662	99.055	1.86286	0.994447	0.016459	0.00229065	0.179071	0.788523	0.176198	0	0.0187064	4.03856	0.814932	2.82753	2.68408	2.97868	1078.8	1071.65	1086.04
807	Line 8 20MAl09a-28307-area20B-1	20MAL09a-28307	20B	SLV	SLVa	50.28	24.77	0.211	0.09	5.7	13.91	4.03	0.028	0.675	99.695	1.87315	0.988613	0.0152394	0.00283962	0.177589	0.772557	0.176935	0.000824672	0.018916	4.02667	0.813093	2.88571	2.742	3.01163	1082.42	1073.03	1089.83
808	Line 9 20MAl09a-28307-area20B-1	20MAL09a-28307	20B	SLV	SLVa	49.89	24.75	0.193	0.079	5.73	13.8	4.05	0	0.659	99.15	1.87011	0.993918	0.0140255	0.00250795	0.179627	0.771183	0.178912	0	0.0185817	4.02887	0.81108	2.97556	2.81978	3.13503	1081.17	1072.48	1088.76
809	Line 11 20MAl09a-28307-area20B-1	20MAL09a-28307	20B	SLV	SLVa	49.95	24.72	0.16	0.096	5.7	13.85	3.98	0	0.665	99.122	1.8723	0.992683	0.011627	0.00304754	0.178681	0.773953	0.175814	0	0.0187503	4.02686	0.812435	3.36644	3.21993	3.47594	1092.63	1082.52	1103.2
810	Line 12 20MAl09a-28307-area20B-1	20MAL09a-28307	20B	SLV	SLVa	49.57	24.64	0.216	0.093	5.65	13.73	4.11	0	0.69	98.711	1.86677	0.994111	0.0157701	0.00296615	0.177944	0.770846	0.182408	0	0.0195464	4.03036	0.812451	2.88664	2.74182	3.02477	1081.94	1073.93	1089.25
811	Line 1 20MAl09a-28307-area20A	20MAL09a-28307	20A	SLV	SLVa	50.61	24.62	0.238	0.103	5.72	13.87	3.92	0.058	0.7	99.847	1.8811	0.98036	0.0171499	0.00324229	0.177801	0.768559	0.171709	0.00170431	0.0195713	4.0212	0.812121	2.79236	2.64438	2.93481	1069.46	1063.03	1075.11
812	Line 2 20MAl09a-28307-area20A	20MAL09a-28307	20A	SLV	SLVa	50.86	24.67	0.199	0.078	5.67	14.02	3.72	0.068	0.654	99.939	1.88729	0.980738	0.0143161	0.00245129	0.175958	0.775595	0.16268	0.00199488	0.0182552	4.01928	0.815083	2.78149	2.59617	2.94632	1075.27	1068	1081.13
813	Line 3 20MAl09a-28307-area20A	20MAL09a-28307	20A	SLV	SLVa	51.68	24.71	0.197	0.038	5.44	14.17	3.03	0.052	0.558	99.885	1.91422	0.980538	0.0141464	0.00119204	0.168513	0.782464	0.132264	0.00152271	0.0155471	4.01041	0.822801	1.99794	1.89547	2.11493	1072.79	1068.31	1077.05
814	Line 4 20MAl09a-28307-area20A	20MAL09a-28307	20A	SLV	SLVa	51.58	24.72	0.205	0.101	5.46	14.33	2.99	0.068	0.569	100.023	1.90944	0.980379	0.0147125	0.00316653	0.169036	0.790851	0.130444	0.00199011	0.0158446	4.01586	0.8239	1.92597	1.79173	2.07542	1067.89	1062.48	1072.54
815	Line 5 20MAl09a-28307-area20A	20MAL09a-28307	20A	SLV	SLVa	49.59	24.58	0.189	0.089	6.22	13.15	4.85	0.095	0.841	99.62	1.85349	0.984239	0.0136952	0.00281725	0.194424	0.732736	0.213633	0.00280715	0.023645	4.02149	0.790301	2.22982	2.10748	2.37108	1067.45	1063.24	1072
816	Line 6 20MAl09a-28307-area20A	20MAL09a-28307	20A	SLV	SLVa	49.55	24.47	0.198	0.104	6.28	13.09	4.93	0.058	0.8	99.48	1.85407	0.980933	0.0143634	0.00329576	0.19652	0.730211	0.217401	0.00171576	0.0225175	4.02103	0.787943	2.34129	2.22431	2.46814	1065.4	1060.69	1070.14
817	Line 7 20MAl09a-28307-area20A	20MAL09a-28307	20A	SLV	SLVa	49.71	24.56	0.233	0.103	6.3	13.22	4.81	0.106	0.802	99.856	1.85419	0.981433	0.016849	0.00325377	0.196523	0.735134	0.211439	0.0031258	0.0225025	4.02445	0.78906	2.10337	1.97086	2.27033	1062.04	1057.64	1066.31
818	Line 8 20MAl09a-28307-area20A	20MAL09a-28307	20A	SLV	SLVa	49.69	24.58	0.186	0.076	6.21	13.29	4.6	0.049	0.801	99.489	1.8592	0.985284	0.0134921	0.0024083	0.194318	0.741323	0.202836	0.00144943	0.0225443	4.02286	0.792316	2.65936	2.48744	2.81709	1066.3	1060.91	1073.11
819	Line 9 20MAl09a-28307-area20A	20MAL09a-28307	20A	SLV	SLVa	51.47	24.7	0.158	0.092	5.39	14.2	3.06	0.035	0.579	99.684	1.91064	0.982297	0.0113708	0.00289235	0.167331	0.785845	0.133868	0.00102716	0.0161677	4.01143	0.824449	2.13103	2.0007	2.24138	1086.37	1079.79	1091.87
820	Line 10 20MAl09a-28307-area20A	20MAL09a-28307	20A	SLV	SLVa	51.74	24.69	0.225	0.082	5.42	14.18	3.05	0.065	0.584	100.036	1.91348	0.978229	0.016132	0.00256833	0.167633	0.781805	0.132931	0.00190045	0.0162464	4.01092	0.82344	1.83253	1.70853	1.9826	1067.95	1063.85	1071.91
821	Line 11 20MAl09a-28307-area20A	20MAL09a-28307	20A	SLV	SLVa	51.55	24.73	0.186	0.119	5.41	14.14	3.09	0.055	0.566	99.874	1.91093	0.982113	0.0133671	0.00373595	0.167717	0.781429	0.134991	0.00161184	0.0157826	4.01167	0.823297	2.04303	1.89568	2.21111	1069.78	1063.89	1075.7
822	Line 12 20MAl09a-28307-area20A	20MAL09a-28307	20A	SLV	SLVa	51.37	24.64	0.182	0.099	5.42	14.28	3.05	0.058	0.582	99.68	1.90783	0.980375	0.0131042	0.00311389	0.168342	0.790647	0.133493	0.00170295	0.0162592	4.01487	0.824459	1.93253	1.80076	2.07161	1073.89	1067.78	1079
823	Line 13 20MAl09a-28307-area20A	20MAL09a-28307	20A	SLV	SLVa	51.35	24.68	0.192	0.091	5.35	14.22	3.01	0.048	0.584	99.537	1.90971	0.983317	0.0138432	0.0028662	0.166396	0.788408	0.131924	0.00141128	0.0163375	4.01421	0.825727	1.98142	1.84628	2.11792	1073.49	1068.6	1078.11
824	Line 14 20MAl09a-28307-area20A	20MAL09a-28307	20A	SLV	SLVa	51.56	24.67	0.143	0.068	5.35	14.22	3.03	0.061	0.565	99.668	1.91319	0.980703	0.010287	0.00213695	0.166021	0.78663	0.132501	0.00178946	0.0157703	4.00903	0.825727	1.99267	1.89349	2.10946	1083.6	1078.45	1088.43
825	Line 15 20MAl09a-28307-area20A	20MAL09a-28307	20A	SLV	SLVa	51.55	24.67	0.184	0.11	5.45	14.22	3.06	0.039	0.558	99.842	1.91099	0.979761	0.0132238	0.00345351	0.168962	0.785875	0.133684	0.00114298	0.01556	4.01265	0.823046	2.08613	1.96841	2.203	1073.17	1066.76	1079.36
826	Line 16 20MAl09a-28307-area20A	20MAL09a-28307	20A	SLV	SLVa	51.36	24.51	0.198	0.123	5.36	14.19	2.98	0.061	0.568	99.356	1.91277	0.977921	0.0142959	0.00387956	0.166942	0.787854	0.130793	0.00179603	0.0159123	4.01217	0.825154	2.01707	1.87966	2.16032	1066	1060.59	1070.93
827	Line 17 20MAl09a-28307-area20A	20MAL09a-28307	20A	SLV	SLVa	51.56	24.67	0.188	0.109	5.35	14.29	3.01	0.041	0.59	99.808	1.91129	0.979726	0.0135108	0.00342199	0.165856	0.789715	0.131495	0.00120155	0.0164517	4.01267	0.826433	2.02625	1.88009	2.14885	1073.65	1067.93	1079.38
828	Line 18 20MAl09a-28307-area20A	20MAL09a-28307	20A	SLV	SLVa	49.53	24.52	0.194	0.092	6.24	13.17	4.84	0.106	0.778	99.474	1.8539	0.983244	0.0140776	0.00291639	0.195329	0.734902	0.213498	0.00313668	0.0219051	4.02291	0.790021	2.25317	2.08806	2.42905	1068.07	1063.96	1072
829	Line 19 20MAl09a-28307-area20A	20MAL09a-28307	20A	SLV	SLVa	49.7	24.47	0.205	0.088	6.22	13.38	4.82	0.082	0.762	99.728	1.85446	0.978175	0.0148294	0.00278088	0.194095	0.744289	0.211952	0.00241891	0.0213876	4.02438	0.79316	2.13556	1.99785	2.28624	1064.99	1060.03	1070.53
830	Line 20 20MAl09a-28307-area20A	20MAL09a-28307	20A	SLV	SLVa	49.58	24.39	0.187	0.09	5.91	13.31	4.93	0.076	0.735	99.209	1.85643	0.978374	0.0135744	0.00285399	0.185064	0.742975	0.217544	0.00224973	0.0207016	4.01976	0.800586	2.23592	2.10817	2.37463	1073.99	1068.15	1080.12
831	Line 21 20MAl09a-28307-area20A	20MAL09a-28307	20A	SLV	SLVa	49.73	24.36	0.176	0.086	5.96	13.19	4.88	0.092	0.718	99.196	1.86179	0.977038	0.0127742	0.00272677	0.186604	0.736176	0.215309	0.00272298	0.0202201	4.01536	0.79778	2.25423	2.11895	2.37816	1073.55	1068.48	1079.76
832	Line 22 20MAl09a-28307-area20A	20MAL09a-28307	20A	SLV	SLVa	49.71	24.44	0.159	0.082	5.92	13.03	4.89	0.09	0.719	99.04	1.86371	0.981651	0.0115569	0.00260367	0.185618	0.728288	0.216059	0.0026676	0.0202773	4.01243	0.796896	2.3489	2.2443	2.46578	1077.9	1072.16	1084.63
833	Line 23 20MAl09a-28307-area20A	20MAL09a-28307	20A	SLV	SLVa	49.66	24.32	0.237	0.093	5.86	13.27	4.92	0.067	0.726	99.159	1.85951	0.97561	0.0172047	0.00294926	0.183507	0.740776	0.217113	0.0019834	0.0204491	4.0191	0.80146	2.14177	2.02143	2.26981	1071.41	1065.73	1077.68
834	Line 24 20MAl09a-28307-area20A	20MAL09a-28307	20A	SLV	SLVa	49.48	24.4	0.207	0.106	5.91	13.23	4.87	0.073	0.702	98.988	1.85772	0.981438	0.0150671	0.00337051	0.185568	0.740519	0.215482	0.0021668	0.019826	4.02116	0.799622	2.14433	1.99831	2.29518	1069.29	1063.06	1075.84
835	Line 25 20MAl09a-28307-area20A	20MAL09a-28307	20A	SLV	SLVa	49.59	24.42	0.182	0.083	5.8	13.32	4.78	0.081	0.718	98.975	1.86052	0.981541	0.0132379	0.00263729	0.181984	0.745023	0.211348	0.00240254	0.0202634	4.01896	0.803687	2.2808	2.14212	2.42978	1076.38	1070.11	1082.37
836	Line 26 20MAl09a-28307-area20A	20MAL09a-28307	20A	SLV	SLVa	49.8	24.38	0.211	0.129	5.85	13.25	4.86	0.085	0.714	99.286	1.86232	0.976746	0.0152974	0.00408559	0.182955	0.738698	0.214187	0.00251298	0.0200849	4.01689	0.801492	2.11114	1.9789	2.24714	1064.79	1059.03	1070.78
837	Line 27 20MAl09a-28307-area20A	20MAL09a-28307	20A	SLV	SLVa	49.82	24.24	0.232	0.086	5.9	13.33	4.79	0.093	0.718	99.227	1.86392	0.97158	0.0168275	0.00272497	0.184603	0.743497	0.211198	0.00275076	0.0202067	4.01731	0.801095	2.01082	1.88734	2.15267	1069.6	1064.35	1075.3
838	Line 28 20MAl09a-28307-area20A	20MAL09a-28307	20A	SLV	SLVa	49.65	24.38	0.184	0.088	5.99	13.27	4.85	0.071	0.717	99.199	1.85954	0.978232	0.0133602	0.00279131	0.187619	0.740938	0.214071	0.00210227	0.0202	4.01885	0.797946	2.32223	2.16644	2.4843	1072.51	1066.92	1079.18
839	Line 29 20MAl09a-28307-area20A	20MAL09a-28307	20A	SLV	SLVa	49.69	24.54	0.206	0.11	5.93	13.25	4.81	0.104	0.723	99.364	1.85885	0.983493	0.01494	0.00348503	0.185521	0.738951	0.212056	0.00307576	0.0203451	4.02071	0.799322	2.16318	1.99962	2.33129	1068.36	1062.91	1074.2
840	Line 30 20MAl09a-28307-area20A	20MAL09a-28307	20A	SLV	SLVa	49.86	24.47	0.176	0.082	5.89	13.38	4.7	0.084	0.733	99.389	1.86324	0.979652	0.0127508	0.00259519	0.184075	0.745413	0.206987	0.00248165	0.0206047	4.0178	0.801961	2.34708	2.21485	2.52452	1074.61	1068.04	1081.42
841	Line 31 20MAl09a-28307-area20A	20MAL09a-28307	20A	SLV	SLVa	49.57	24.51	0.187	0.098	5.84	13.42	4.67	0.085	0.708	99.103	1.85917	0.984839	0.0135972	0.0031129	0.183179	0.750374	0.206418	0.00252037	0.0199747	4.02319	0.803783	2.31355	2.13426	2.50166	1072.18	1066	1078.98
842	Line 32 20MAl09a-28307-area20A	20MAL09a-28307	20A	SLV	SLVa	49.75	24.54	0.187	0.102	5.87	13.5	4.7	0.069	0.728	99.446	1.8589	0.982336	0.0135461	0.00322777	0.183428	0.752007	0.206962	0.00203825	0.0204617	4.02291	0.803912	2.4591	2.28018	2.63551	1074.38	1067.21	1080.86
843	Line 33 20MAl09a-28307-area20A	20MAL09a-28307	20A	SLV	SLVa	49.84	24.46	0.237	0.07	5.86	13.43	4.75	0.084	0.7	99.437	1.86149	0.978725	0.0171609	0.00221421	0.183039	0.747796	0.209077	0.00248031	0.0196665	4.02165	0.80336	2.00982	1.89035	2.15961	1069.72	1063.53	1075.23
844	Line 34 20MAl09a-28307-area20A	20MAL09a-28307	20A	SLV	SLVa	49.89	24.33	0.214	0.052	5.92	13.34	4.85	0.086	0.715	99.397	1.86288	0.973275	0.0154915	0.00164442	0.184866	0.742596	0.213424	0.00253872	0.0200828	4.0168	0.800675	2.04794	1.9254	2.18548	1068.12	1062.15	1073.9
845	Line 35 20MAl09a-28307-area20A	20MAL09a-28307	20A	SLV	SLVa	49.2	24.51	0.188	0.11	6.04	13.33	4.8	0.057	0.729	98.965	1.8507	0.987726	0.01371	0.00350431	0.190008	0.747526	0.212786	0.00169508	0.0206274	4.02829	0.797332	2.43846	2.28521	2.60274	1069.43	1063.35	1076.37
846	Line 36 20MAl09a-28307-area20A	20MAL09a-28307	20A	SLV	SLVa	49.62	24.46	0.191	0.099	5.97	13.38	4.82	0.062	0.745	99.347	1.85648	0.980417	0.013854	0.00313694	0.186797	0.7463	0.212525	0.00183387	0.0209669	4.02231	0.799809	2.37965	2.2407	2.55235	1072.92	1066.31	1080.36
847	Line 37 20MAl09a-28307-area20A	20MAL09a-28307	20A	SLV	SLVa	49.55	24.54	0.214	0.086	5.96	13.34	4.88	0.073	0.721	99.373	1.85418	0.983795	0.015525	0.0027255	0.186517	0.744199	0.215208	0.00215961	0.020295	4.0246	0.799598	2.12369	1.9923	2.26191	1071.42	1065.46	1077.84
848	Line 38 20MAl09a-28307-area20A	20MAL09a-28307	20A	SLV	SLVa	49.33	24.57	0.239	0.111	6.02	13.42	4.89	0.065	0.726	99.38	1.84799	0.986088	0.0173578	0.00352168	0.188603	0.74949	0.215888	0.00192507	0.0204584	4.03132	0.798951	2.13029	2.01158	2.26354	1065.12	1059.33	1071.45
849	Line 39 20MAl09a-28307-area20A	20MAL09a-28307	20A	SLV	SLVa	49.41	24.41	0.207	0.084	6	13.23	4.89	0.074	0.715	99.026	1.85529	0.981942	0.0150687	0.00267125	0.188413	0.740595	0.216389	0.00219671	0.0201952	4.02276	0.797189	2.1347	2.00521	2.29648	1069.93	1064.22	1076.29
850	Line 40 20MAl09a-28307-area20A	20MAL09a-28307	20A	SLV	SLVa	49.76	24.48	0.224	0.098	6.27	13.39	4.9	0.071	0.747	99.95	1.85301	0.97663	0.0161716	0.00309073	0.195267	0.743365	0.215042	0.00209026	0.0209249	4.02559	0.791967	2.09703	1.97457	2.24302	1062.53	1058.47	1067.29
851	Line 41 20MAl09a-28307-area20A	20MAL09a-28307	20A	SLV	SLVa	48.87	24.23	0.191	0.054	6.17	13.17	4.8	0.059	0.733	98.285	1.85136	0.983384	0.0140278	0.00173253	0.195477	0.743804	0.214299	0.00176703	0.0208881	4.02674	0.791886	2.42516	2.27528	2.58336	1065.85	1060.66	1072.41
852	Line 42 20MAl09a-28307-area20A	20MAL09a-28307	20A	SLV	SLVa	49.04	24.29	0.253	0.116	6.19	13.1	4.87	0.089	0.722	98.67	1.85111	0.982271	0.0185145	0.00370833	0.195405	0.737188	0.216641	0.00265593	0.0205006	4.028	0.790471	1.99047	1.87567	2.10043	1060.43	1056.34	1064.82
853	Line 43 20MAl09a-28307-area20A	20MAL09a-28307	20A	SLV	SLVa	49.37	24.37	0.176	0.102	6.14	13.31	4.79	0.069	0.669	99.023	1.85556	0.981274	0.0128243	0.00324677	0.192994	0.745789	0.212167	0.00205025	0.0189141	4.02482	0.794421	2.38431	2.21086	2.56857	1068.31	1062.45	1074.53
854	Line 1 20MAl09a-28307-area12A	20MAL09a-28307	12A	SLV	SLVa	50.6	24.54	0.134	0.097	5.76	13.89	4.07	0.05	0.717	99.884	1.87918	0.976371	0.00964787	0.00305091	0.178897	0.769034	0.178132	0.00146802	0.0200301	4.01581	0.811276	3.41828	3.3165	3.50903	1095.62	1084.46	1106.37
855	Line 2 20MAl09a-28307-area12A	20MAL09a-28307	12A	SLV	SLVa	50.22	24.51	0.196	0.081	5.75	13.95	4.05	0.075	0.715	99.547	1.87287	0.979258	0.0141709	0.00255832	0.179334	0.775587	0.177999	0.00221125	0.0200578	4.02405	0.8122	2.84344	2.67123	3.01338	1072.71	1065.99	1079.52
856	Line 3 20MAl09a-28307-area12A	20MAL09a-28307	12A	SLV	SLVa	50.44	24.4	0.222	0.084	5.82	13.85	4.06	0.066	0.734	99.695	1.87764	0.973079	0.0160213	0.00264822	0.181185	0.768619	0.178112	0.00194234	0.0205532	4.01979	0.809239	2.77003	2.63147	2.90561	1068.25	1060.58	1074.78
857	Line 4 20MAl09a-28307-area12A	20MAL09a-28307	12A	SLV	SLVa	49.64	24.55	0.233	0.088	6.11	13.43	4.73	0.064	0.859	99.716	1.8529	0.981733	0.016861	0.0027819	0.190733	0.747345	0.208071	0.00188862	0.024119	4.02643	0.796677	2.2185	2.09751	2.3473	1063.44	1058.11	1070.19
858	Line 5 20MAl09a-28307-area12A	20MAL09a-28307	12A	SLV	SLVa	51.3	24.63	0.187	0.12	5.46	14.3	3.16	0	0.562	99.734	1.90487	0.979791	0.0134616	0.0037737	0.169552	0.791604	0.138282	0	0.0156975	4.01703	0.823596	2.2694	2.14284	2.4266	1072.55	1066.67	1079.78
859	Line 6 20MAl09a-28307-area12A	20MAL09a-28307	12A	SLV	SLVa	51.04	24.6	0.16	0.112	5.38	14.33	3.15	0.046	0.566	99.408	1.90185	0.982027	0.0115583	0.00353446	0.167653	0.796045	0.138327	0.00135509	0.0158646	4.01822	0.826031	2.16874	2.01133	2.33925	1078.47	1072.58	1084.38
860	Line 8 20MAl09a-28307-area12A	20MAL09a-28307	12A	SLV	SLVa	51.51	24.65	0.199	0.099	5.33	14.41	3.13	0.042	0.545	99.93	1.90721	0.977792	0.0142846	0.00310443	0.165044	0.79542	0.136578	0.00122942	0.0151793	4.01585	0.828163	2.12053	1.99483	2.27985	1073.17	1067.72	1077.99
861	Line 9 20MAl09a-28307-area12A	20MAL09a-28307	12A	SLV	SLVa	51.18	24.72	0.175	0.107	5.34	14.37	3.2	0.044	0.55	99.7	1.90109	0.98372	0.0126022	0.00336608	0.165885	0.795761	0.140082	0.00129211	0.0153677	4.01916	0.827499	2.24293	2.08118	2.42129	1077.23	1071.22	1082.99
862	Line 10 20MAl09a-28307-area12A	20MAL09a-28307	12A	SLV	SLVa	51.38	24.58	0.165	0.066	5.4	14.38	3.19	0.033	0.562	99.766	1.90547	0.976589	0.0118632	0.00207296	0.167481	0.795045	0.139421	0.000967536	0.015678	4.01459	0.825999	2.24973	2.11332	2.43824	1085.49	1078.87	1091.53
863	Line 11 20MAl09a-28307-area12A	20MAL09a-28307	12A	SLV	SLVa	51.49	24.68	0.176	0.09	5.43	14.4	3.06	0.043	0.551	99.92	1.90745	0.979481	0.0126401	0.00282365	0.168226	0.795273	0.133592	0.00125934	0.0153542	4.0161	0.825401	2.0903	1.97556	2.20644	1077.47	1071.47	1082.57
864	Line 12 20MAl09a-28307-area12A	20MAL09a-28307	12A	SLV	SLVa	51.38	24.65	0.166	0.11	5.39	14.48	3.03	0.037	0.572	99.834	1.90558	0.979425	0.0119357	0.00345513	0.16718	0.800619	0.132436	0.00108487	0.0159579	4.01767	0.827257	2.10651	1.97451	2.2366	1079.76	1072.6	1085.51
865	Line 13 20MAl09a-28307-area12A	20MAL09a-28307	12A	SLV	SLVa	49.63	24.58	0.209	0.108	6.17	13.04	4.36	0.052	0.765	98.914	1.86804	0.991166	0.015251	0.00344275	0.194219	0.73172	0.193401	0.00154736	0.0216596	4.02045	0.790247	2.64507	2.51212	2.79686	1058.66	1052.54	1064.9
866	Line 14 20MAl09a-28307-area12A	20MAL09a-28307	12A	SLV	SLVa	49.72	24.48	0.189	0.1	6.29	12.93	4.64	0.033	0.804	99.189	1.86541	0.98396	0.0137472	0.00317748	0.19736	0.723215	0.20516	0.00097882	0.0226906	4.0157	0.785613	2.53764	2.39598	2.67658	1066.93	1061.44	1072.69
867	Line 15 20MAl09a-28307-area12A	20MAL09a-28307	12A	SLV	SLVa	48.66	24.42	0.203	0.113	6.75	12.5	5.31	0.065	0.975	99.001	1.8364	0.987329	0.0148525	0.0036117	0.21304	0.703282	0.236167	0.00193933	0.0276787	4.0243	0.767505	2.29768	2.19332	2.40924	1058.45	1052.98	1062.97
868	Line 16 20MAl09a-28307-area12A	20MAL09a-28307	12A	SLV	SLVa	49.08	24.56	0.216	0.102	6.48	12.82	5.03	0.08	0.912	99.28	1.84444	0.988807	0.015737	0.00324639	0.203657	0.718247	0.222771	0.00237682	0.0257811	4.02507	0.779091	2.07671	1.97163	2.20438	1059.44	1053.65	1064.85
869	Line 17 20MAl09a-28307-area12A	20MAL09a-28307	12A	SLV	SLVa	48.23	24.38	0.176	0.075	6.93	12.26	5.43	0.089	1.018	98.588	1.83011	0.991093	0.0129473	0.00241023	0.219915	0.693544	0.242822	0.00266989	0.0290571	4.02457	0.75925	2.42838	2.25525	2.58928	1059.93	1055.67	1064.39
870	Line 18 20MAl09a-28307-area12A	20MAL09a-28307	12A	SLV	SLVa	48.49	24.44	0.18	0.087	6.92	12.42	5.45	0.055	1.021	99.092	1.83039	0.988356	0.0131726	0.0027813	0.218454	0.698935	0.242447	0.00164134	0.028991	4.02517	0.761874	2.37449	2.25746	2.49709	1061.47	1056.22	1066.38
871	Line 19 20MAl09a-28307-area12A	20MAL09a-28307	12A	SLV	SLVa	48.56	24.46	0.231	0.083	6.79	12.42	5.41	0.072	1.038	99.066	1.83218	0.988706	0.016897	0.0026522	0.214251	0.698611	0.240556	0.00214766	0.02946	4.02546	0.765298	2.12607	2.01546	2.24354	1057	1050.57	1061.94
872	Line 20 20MAl09a-28307-area12A	20MAL09a-28307	12A	SLV	SLVa	48.77	24.41	0.238	0.087	6.77	12.56	5.43	0.038	1.004	99.308	1.83419	0.983516	0.0173531	0.00277108	0.212933	0.704216	0.24067	0.00112985	0.0284035	4.02518	0.767831	2.17082	2.10634	2.24901	1061.15	1054.19	1067.55
873	Line 21 20MAl09a-28307-area12A	20MAL09a-28307	12A	SLV	SLVa	48.44	24.41	0.213	0.106	6.9	12.57	5.37	0.062	1.018	99.091	1.82867	0.987235	0.015589	0.00338903	0.217843	0.707442	0.238911	0.00185041	0.0289085	4.02984	0.764567	2.21911	2.10878	2.32842	1056.92	1050.52	1061.58
874	Line 22 20MAl09a-28307-area12A	20MAL09a-28307	12A	SLV	SLVa	48.35	24.42	0.162	0.067	6.83	12.57	5.45	0.052	1.019	98.92	1.82733	0.988755	0.0118698	0.00214454	0.215876	0.708241	0.242743	0.00155371	0.0289695	4.02748	0.766397	2.48169	2.37926	2.58644	1061.07	1055.79	1066.75
875	Line 23 20MAl09a-28307-area12A	20MAL09a-28307	12A	SLV	SLVa	48.49	24.35	0.232	0.123	6.79	12.51	5.44	0.059	1.052	99.047	1.82988	0.984447	0.0169734	0.00393111	0.214291	0.703807	0.241936	0.00176023	0.029863	4.02689	0.766592	2.20043	2.1077	2.29308	1055.24	1047.26	1060.06
876	Line 24 20MAl09a-28307-area12A	20MAL09a-28307	12A	SLV	SLVa	48.5	24.39	0.226	0.108	6.77	12.39	5.42	0.05	1.031	98.907	1.8329	0.987486	0.0165582	0.00345668	0.213968	0.698061	0.241394	0.00149387	0.0293091	4.02463	0.765393	2.16404	2.09003	2.25438	1060.3	1054.76	1065.49
877	Line 25 20MAl09a-28307-area12A	20MAL09a-28307	12A	SLV	SLVa	48.39	24.42	0.211	0.091	6.83	12.4	5.46	0.06	1.032	98.894	1.82952	0.989122	0.0154658	0.00291382	0.215957	0.698922	0.243279	0.0017934	0.02935	4.02632	0.763951	2.24466	2.1303	2.35781	1059.79	1053.95	1064.59
878	Line 1 20MAl09a-28307-area16	20MAL09a-28307	16	SLV	SLVa	49.69	24.57	0.185	0.082	5.87	13.06	4.03	0.048	0.705	98.24	1.88015	0.995982	0.0135708	0.00262771	0.185749	0.736703	0.179705	0.00143585	0.020066	4.01599	0.798636	2.98794	2.83398	3.1552	1067.26	1060.86	1075
879	Line 2 20MAl09a-28307-area16	20MAL09a-28307	16	SLV	SLVa	49.64	24.5	0.174	0.075	5.86	13.21	4	0.049	0.695	98.203	1.87877	0.993416	0.0127673	0.00240405	0.185483	0.745368	0.178416	0.00146617	0.0197867	4.01788	0.800738	3.09206	2.91345	3.23942	1070.16	1062.45	1078.67
880	Line 3 20MAl09a-28307-area16	20MAL09a-28307	16	SLV	SLVa	50.15	24.51	0.245	0.078	5.84	13.24	3.99	0.086	0.694	98.833	1.88435	0.986634	0.017847	0.00248213	0.183513	0.741658	0.176683	0.00255467	0.0196154	4.01534	0.801644	2.50499	2.36179	2.6386	1058.2	1052.09	1064.6
881	Line 4 20MAl09a-28307-area16	20MAL09a-28307	16	SLV	SLVa	50.07	24.47	0.21	0.086	5.85	13.26	3.99	0.074	0.687	98.697	1.8839	0.986362	0.0153182	0.00274042	0.184077	0.743787	0.176923	0.00220119	0.0194439	4.01475	0.801612	2.70673	2.55322	2.87154	1062.91	1056.05	1070.16
882	Line 5 20MAl09a-28307-area16	20MAL09a-28307	16	SLV	SLVa	48.88	24.32	0.246	0.091	6.01	13.29	4.48	0.1	0.797	98.214	1.85378	0.988126	0.0180872	0.00292285	0.190618	0.75141	0.200233	0.00299828	0.0227369	4.03091	0.797651	2.25449	2.1444	2.34925	1060.22	1056.03	1065.9
883	Line 6 20MAl09a-28307-area16	20MAL09a-28307	16	SLV	SLVa	49.05	24.32	0.197	0.117	6.21	13.39	4.7	0.091	0.823	98.898	1.84798	0.981622	0.0143891	0.00373322	0.195665	0.752081	0.208683	0.00271047	0.0233241	4.03019	0.793547	2.27311	2.11793	2.43972	1059.77	1055.14	1064.39
884	Line 7 20MAl09a-28307-area16	20MAL09a-28307	16	SLV	SLVa	49.25	24.3	0.226	0.103	6.17	13.48	4.59	0.103	0.8	99.022	1.85225	0.979089	0.0164782	0.00328073	0.194063	0.755803	0.20344	0.0030625	0.0226324	4.0301	0.795694	2.22314	2.08616	2.35232	1058.91	1054.36	1064.93
885	Line 8 20MAl09a-28307-area16	20MAL09a-28307	16	SLV	SLVa	49.14	24.35	0.222	0.067	6.05	13.53	4.38	0.088	0.709	98.538	1.85687	0.985754	0.0162633	0.00214418	0.191191	0.762202	0.195053	0.00262891	0.020153	4.03226	0.799463	2.28954	2.17838	2.4076	1059.52	1054.08	1066.05
886	Line 9 20MAl09a-28307-area16	20MAL09a-28307	16	SLV	SLVa	49.17	24.32	0.191	0.078	6.06	13.39	4.6	0.067	0.733	98.613	1.85559	0.983258	0.0139741	0.00249296	0.191257	0.753334	0.204583	0.00199895	0.0208081	4.0273	0.797524	2.52023	2.34867	2.67832	1067.31	1061.19	1074.5
887	Line 10 20MAl09a-28307-area16	20MAL09a-28307	16	SLV	SLVa	49.12	24.31	0.161	0.114	6.22	13.32	4.64	0.097	0.786	98.792	1.85247	0.982198	0.0117714	0.00364113	0.196176	0.748895	0.206224	0.00289207	0.0222977	4.02656	0.792422	2.554	2.40389	2.69347	1066.05	1061.02	1071.47
888	Line 11 20MAl09a-28307-area16	20MAL09a-28307	16	SLV	SLVa	49.25	24.32	0.141	0.086	6.18	13.31	4.57	0.059	0.806	98.721	1.8569	0.982352	0.0103064	0.00274611	0.194865	0.748143	0.203062	0.00175865	0.0228593	4.02299	0.793358	2.95113	2.81057	3.09133	1075.2	1069.36	1083.17
889	Line 12 20MAl09a-28307-area16	20MAL09a-28307	16	SLV	SLVa	49.15	24.32	0.23	0.075	6.09	13.39	4.63	0.061	0.791	98.737	1.85305	0.982309	0.0168112	0.00239477	0.192019	0.752607	0.205719	0.00181818	0.0224329	4.02916	0.796725	2.32362	2.19436	2.45815	1062.9	1056.65	1069.77
890	Line 13 20MAl09a-28307-area16	20MAL09a-28307	16	SLV	SLVa	49.08	24.29	0.178	0.1	6.12	13.35	4.58	0.06	0.811	98.588	1.85385	0.982922	0.0130346	0.00319896	0.193324	0.751754	0.203876	0.0017917	0.0230429	4.02679	0.795442	2.69242	2.51809	2.8511	1068.35	1062.46	1075.21
891	Line 14 20MAl09a-28307-area16	20MAL09a-28307	16	SLV	SLVa	48.96	24.35	0.174	0.098	6.15	13.38	4.56	0.08	0.817	98.569	1.85065	0.986058	0.0127509	0.00313723	0.194411	0.753985	0.203131	0.00239065	0.02323	4.02974	0.795011	2.56123	2.38203	2.73507	1065.92	1060.57	1072.82
892	Line 1 20MAl09a-28307-area23	20MAL09a-28307	23	SLV	SLVa	49.83	24.55	0.172	0.114	5.82	13.59	4.01	0.019	0.734	98.84	1.87369	0.988964	0.0125385	0.00363037	0.183018	0.761819	0.177698	0.000564814	0.0207611	4.02269	0.806297	3.20423	3.03904	3.356	1083.18	1072.36	1094.64
893	Line 2 20MAl09a-28307-area23	20MAL09a-28307	23	SLV	SLVa	49.65	24.16	0.175	0.09	5.62	13.79	3.92	0	0.72	98.142	1.87712	0.978571	0.0128268	0.00288174	0.177694	0.777253	0.174658	0	0.0204763	4.02148	0.813923	3.17191	2.98135	3.34958	1091.41	1080.74	1100.82
894	Line 3 20MAl09a-28307-area23	20MAL09a-28307	23	SLV	SLVa	50.07	24.54	0.18	0.103	5.85	13.75	3.94	0	0.737	99.177	1.87579	0.984922	0.0130733	0.003268	0.183284	0.76795	0.173953	0	0.0207692	4.02301	0.80732	3.07427	2.89045	3.25201	1083.07	1073.1	1093.15
895	Line 4 20MAl09a-28307-area23	20MAL09a-28307	23	SLV	SLVa	49.98	24.35	0.181	0.085	5.72	13.72	3.97	0.068	0.72	98.795	1.87761	0.980008	0.0131824	0.00270437	0.179708	0.768401	0.175764	0.00201959	0.0203464	4.01974	0.810456	3.03268	2.86722	3.18478	1075.71	1067.31	1083.1
896	Line 5 20MAl09a-28307-area23	20MAL09a-28307	23	SLV	SLVa	49.62	24.37	0.202	0.101	5.81	13.77	4.08	0.062	0.764	98.78	1.86714	0.982421	0.014736	0.0032187	0.182835	0.772465	0.18093	0.00184441	0.0216252	4.02722	0.80861	2.89476	2.73165	3.03751	1070.92	1063.26	1078.46
897	Line 6 20MAl09a-28307-area23	20MAL09a-28307	23	SLV	SLVa	49.8	24.46	0.17	0.085	5.79	13.79	4.02	0.042	0.746	98.906	1.87077	0.984394	0.0123808	0.00270426	0.1819	0.772289	0.17797	0.00124734	0.0210802	4.02473	0.809367	3.18887	3.01516	3.33615	1084.07	1074.71	1094.06
898	Line 7 20MAl09a-28307-area23	20MAL09a-28307	23	SLV	SLVa	49.87	24.54	0.154	0.137	5.84	13.76	4	0.04	0.744	99.088	1.87093	0.986313	0.0112008	0.00435289	0.183229	0.769594	0.176851	0.00118638	0.020996	4.02465	0.807699	3.33123	3.18428	3.44039	1079.77	1069.68	1091.28
899	Line 8 20MAl09a-28307-area23	20MAL09a-28307	23	SLV	SLVa	48.52	24.49	0.171	0.083	6.36	13.15	4.93	0.058	0.969	98.731	1.83466	0.992079	0.0125355	0.00265798	0.201121	0.741287	0.219691	0.00173384	0.0275617	4.03333	0.786589	2.43583	2.31968	2.56448	1068.78	1063.87	1074.48
900	Line 9 20MAl09a-28307-area23	20MAL09a-28307	23	SLV	SLVa	48.2	24.5	0.22	0.092	6.73	12.82	5.5	0.048	1.031	99.146	1.81875	0.99041	0.0160938	0.00294004	0.212376	0.721174	0.244579	0.0014319	0.0292639	4.03702	0.772507	2.18723	2.09725	2.28259	1057.38	1051.37	1064.74
901	Line 10 20MAl09a-28307-area23	20MAL09a-28307	23	SLV	SLVa	48.13	24.54	0.17	0.077	6.68	12.93	5.44	0.069	1.009	99.046	1.81783	0.992966	0.0124479	0.00246302	0.210998	0.72805	0.24214	0.00206031	0.0286665	4.03762	0.775307	2.4951	2.37348	2.60531	1058.54	1053.41	1064.2
902	Line 11 20MAl09a-28307-area23	20MAL09a-28307	23	SLV	SLVa	48.17	24.48	0.247	0.1	6.82	12.91	5.42	0.094	1.01	99.259	1.81714	0.989337	0.0180641	0.00319484	0.215159	0.726043	0.240957	0.00280339	0.0286602	4.04135	0.7714	2.07297	1.93787	2.2147	1052.55	1047.4	1058.37
903	Line 12 20MAl09a-28307-area23	20MAL09a-28307	23	SLV	SLVa	48.16	24.49	0.218	0.1	6.75	12.78	5.52	0.09	1.032	99.146	1.81773	0.990268	0.0159517	0.00319654	0.213064	0.719114	0.245534	0.00268553	0.0293	4.03684	0.771434	2.23341	2.09774	2.37848	1054.42	1048.46	1060.83
904	Line 14 20MAl09a-28307-area23	20MAL09a-28307	23	SLV	SLVa	48.73	24.56	0.218	0.083	6.72	12.94	5.4	0.07	0.974	99.695	1.8267	0.98633	0.015843	0.00263505	0.210671	0.723154	0.238559	0.00207451	0.0274648	4.03344	0.7744	2.19832	2.0725	2.33343	1053.13	1048.04	1058.96
905	Line 15 20MAl09a-28307-area23	20MAL09a-28307	23	SLV	SLVa	49.12	24.53	0.233	0.092	6.38	13.18	4.99	0.077	0.879	99.481	1.84151	0.985223	0.0169348	0.00292107	0.200032	0.73664	0.220468	0.00228218	0.0247885	4.0308	0.786444	2.03802	1.93567	2.14421	1059	1054.99	1063.99
906	Line 16 20MAl09a-28307-area23	20MAL09a-28307	23	SLV	SLVa	49.14	24.6	0.185	0.085	6.34	13.14	4.86	0.044	0.87	99.264	1.84587	0.989971	0.0134724	0.0027041	0.199167	0.735844	0.215145	0.00130666	0.0245828	4.02806	0.786989	2.4473	2.3156	2.60067	1069.09	1064.09	1074.14
907	Line 17 20MAl09a-28307-area23	20MAL09a-28307	23	SLV	SLVa	51.44	24.67	0.173	0.059	5.58	14.27	3.04	0.069	0.564	99.865	1.90787	0.980254	0.0124395	0.00185327	0.173079	0.789035	0.132877	0.00202321	0.0157352	4.01517	0.820105	1.91163	1.78815	2.01633	1075.13	1069.86	1079.85
908	Line 18 20MAl09a-28307-area23	20MAL09a-28307	23	SLV	SLVa	51.29	24.75	0.205	0.112	5.49	14.37	2.99	0.044	0.574	99.84	1.90428	0.984452	0.0147557	0.00352172	0.170464	0.795388	0.130827	0.0012915	0.0160308	4.02101	0.823509	2.01887	1.87392	2.15031	1066.86	1061.42	1072.16
909	Line 19 20MAl09a-28307-area23	20MAL09a-28307	23	SLV	SLVa	51.31	24.65	0.181	0.072	5.53	14.37	3.01	0.043	0.561	99.729	1.90592	0.980937	0.0130343	0.00226503	0.171787	0.795764	0.131765	0.00126275	0.0156751	4.01841	0.822451	2.04522	1.93688	2.1459	1075.3	1069.96	1080.52
910	Line 20 20MAl09a-28307-area23	20MAL09a-28307	23	SLV	SLVa	51.28	24.71	0.159	0.103	5.46	14.39	3.01	0.032	0.57	99.716	1.90503	0.983441	0.0114514	0.00324063	0.169633	0.796965	0.13178	0.000939828	0.0159285	4.01841	0.824505	2.13288	2.00178	2.25995	1084.66	1078.11	1090.92
911	Line 21 20MAl09a-28307-area23	20MAL09a-28307	23	SLV	SLVa	51.57	24.77	0.191	0.093	5.51	14.34	3.03	0.043	0.561	100.111	1.9079	0.981762	0.0136994	0.00291394	0.17048	0.79092	0.132109	0.00125768	0.0156123	4.01665	0.822675	2.00952	1.887	2.1264	1072.36	1067.21	1078.08
912	Line 22 20MAl09a-28307-area23	20MAL09a-28307	23	SLV	SLVa	51.03	24.72	0.172	0.088	5.5	14.23	2.98	0.049	0.54	99.323	1.90485	0.988567	0.0124472	0.002782	0.171697	0.791891	0.131094	0.00144603	0.0151627	4.01994	0.821815	2.07418	1.97147	2.18129	1076.56	1071.23	1081.04
913	Line 23 20MAl09a-28307-area23	20MAL09a-28307	23	SLV	SLVa	51.14	24.75	0.19	0.092	5.49	14.26	3.01	0.042	0.573	99.57	1.90418	0.987287	0.0137154	0.00290117	0.170955	0.791572	0.132082	0.00123635	0.016049	4.01997	0.822389	2.02438	1.89258	2.13845	1074.19	1068.83	1079.29
914	Line 24 20MAl09a-28307-area23	20MAL09a-28307	23	SLV	SLVa	51.17	24.68	0.205	0.108	5.58	14.46	3	0.047	0.576	99.826	1.90082	0.982183	0.0147634	0.00339772	0.17335	0.80079	0.131334	0.00138028	0.0160951	4.02411	0.822048	1.96904	1.82357	2.0892	1065.87	1060.23	1071.32
915	Line 25 20MAl09a-28307-area23	20MAL09a-28307	23	SLV	SLVa	51.15	24.75	0.173	0.088	5.49	14.34	3.01	0.023	0.574	99.609	1.90339	0.986685	0.0124806	0.00277334	0.170851	0.795528	0.132001	0.000676634	0.0160672	4.02045	0.823205	2.11862	1.98755	2.23071	1082.3	1075.3	1088.55
916	Line 27 20MAl09a-28307-area23	20MAL09a-28307	23	SLV	SLVa	51.14	24.64	0.17	0.054	5.55	14.37	2.98	0	0.549	99.465	1.90529	0.983474	0.0122788	0.00170385	0.172925	0.798145	0.130842	0	0.0153858	4.02004	0.821924	2.33509	2.22382	2.43407	1080.29	1074.88	1084.55
917	Line 28 20MAl09a-28307-area23	20MAL09a-28307	23	SLV	SLVa	50.91	24.64	0.159	0.089	5.55	14.24	3.03	0.036	0.599	99.286	1.90178	0.986098	0.011515	0.0028157	0.173386	0.793035	0.133392	0.00106317	0.0168318	4.01992	0.82059	2.0615	1.91383	2.17469	1084.11	1077.55	1090.09
918	Line 1 20MAl09a-28307-area10	20MAL09a-28307	10	SLV	SLVa	49.82	24.61	0.159	0.093	5.87	13.62	4.41	0.071	0.745	99.398	1.86297	0.985909	0.0115268	0.00294527	0.183571	0.759286	0.194344	0.00209897	0.0209559	4.02361	0.805303	2.94884	2.79151	3.09991	1078.28	1070.44	1087.64
919	Line 2 20MAl09a-28307-area10	20MAL09a-28307	10	SLV	SLVa	49.93	24.6	0.199	0.087	5.86	13.7	4.41	0.038	0.765	99.603	1.86308	0.983395	0.0143957	0.00274934	0.182866	0.762108	0.193928	0.00112098	0.0214723	4.02512	0.806486	2.62563	2.46835	2.80711	1076.53	1068.76	1083.94
920	Line 3 20MAl09a-28307-area10	20MAL09a-28307	10	SLV	SLVa	49.87	24.66	0.165	0.083	5.86	13.89	4.39	0.055	0.742	99.724	1.85921	0.984927	0.0119256	0.00262063	0.182705	0.771998	0.192878	0.00162105	0.0208084	4.02869	0.808626	3.01779	2.85021	3.176	1080.36	1072.54	1090.19
921	Line 4 20MAl09a-28307-area10	20MAL09a-28307	10	SLV	SLVa	49.96	24.7	0.164	0.11	5.88	13.77	4.4	0.088	0.709	99.781	1.86153	0.985975	0.0118467	0.00347119	0.183226	0.764902	0.19321	0.00259224	0.0198719	4.02662	0.806749	2.73014	2.57956	2.86599	1071.56	1064.27	1079.39
922	Line 5 20MAl09a-28307-area10	20MAL09a-28307	10	SLV	SLVa	50	24.73	0.136	0.081	5.81	13.73	4.42	0.049	0.727	99.685	1.8635	0.987427	0.00982667	0.00255672	0.181092	0.762877	0.194138	0.00144378	0.0203817	4.02324	0.808159	3.10748	2.96923	3.26527	1092.03	1082.15	1101.25
923	Line 6 20MAl09a-28307-area10	20MAL09a-28307	10	SLV	SLVa	49.92	24.64	0.185	0.081	5.87	13.75	4.48	0.05	0.745	99.729	1.86045	0.983801	0.0133667	0.00255663	0.182956	0.763963	0.196767	0.00147319	0.0208856	4.02622	0.806788	2.7322	2.57495	2.91215	1076.2	1068.13	1083.62
924	Line 7 20MAl09a-28307-area10	20MAL09a-28307	10	SLV	SLVa	50.02	24.58	0.226	0.116	5.92	13.67	4.48	0.087	0.742	99.841	1.86225	0.980388	0.0163121	0.00365755	0.184323	0.758731	0.196563	0.0025607	0.0207799	4.02556	0.804547	2.32882	2.17484	2.46077	1059.37	1053.43	1065.03
925	Line 8 20MAl09a-28307-area10	20MAL09a-28307	10	SLV	SLVa	49.98	24.56	0.186	0.078	5.91	13.7	4.44	0.078	0.751	99.683	1.86312	0.980831	0.013442	0.00246251	0.184245	0.761359	0.195055	0.00229871	0.0210586	4.02387	0.805156	2.60546	2.44047	2.77031	1069.82	1063.75	1076.89
926	Line 9 20MAl09a-28307-area10	20MAL09a-28307	10	SLV	SLVa	50.12	24.64	0.198	0.111	5.84	13.64	4.49	0.043	0.741	99.831	1.86499	0.982261	0.0142836	0.00349805	0.181736	0.756665	0.196898	0.00126496	0.020741	4.02233	0.806334	2.57075	2.42123	2.73626	1073.08	1065.22	1080.36
927	Line 10 20MAl09a-28307-area10	20MAL09a-28307	10	SLV	SLVa	50.2	24.57	0.208	0.091	5.92	13.77	4.25	0.065	0.723	99.797	1.86897	0.979998	0.0150131	0.00286932	0.184325	0.764288	0.186474	0.00191318	0.020248	4.0241	0.80569	2.7137	2.57257	2.88125	1067.31	1060.42	1074.77
928	Line 11 20MAl09a-28307-area10	20MAL09a-28307	10	SLV	SLVa	50.16	24.6	0.246	0.072	5.89	13.88	4.17	0.08	0.702	99.8	1.86798	0.981459	0.0177606	0.00227084	0.18344	0.770601	0.183013	0.00235532	0.0196652	4.02855	0.807723	2.50433	2.37494	2.64877	1062.72	1056.53	1068.85
929	Line 12 20MAl09a-28307-area10	20MAL09a-28307	10	SLV	SLVa	50.24	24.71	0.205	0.089	5.9	13.83	4.12	0.075	0.702	99.871	1.86989	0.985285	0.0147921	0.00280541	0.183647	0.767387	0.180715	0.00220685	0.019654	4.02639	0.806898	2.70445	2.55995	2.88534	1067.53	1060.31	1074.35
930	Line 13 20MAl09a-28307-area10	20MAL09a-28307	10	SLV	SLVa	50.39	24.62	0.174	0.082	5.86	13.86	4.04	0.085	0.711	99.822	1.87475	0.981314	0.0125503	0.00258375	0.18233	0.768752	0.177137	0.00250013	0.0198982	4.02181	0.808292	2.8865	2.72373	3.03968	1072.8	1065.49	1081.04
931	Line 14 20MAl09a-28307-area10	20MAL09a-28307	10	SLV	SLVa	49.46	24.65	0.204	0.094	6.28	13.35	4.65	0.036	0.853	99.58	1.85121	0.988417	0.0148027	0.00297967	0.196573	0.744917	0.205109	0.00106524	0.0240158	4.02909	0.79121	2.37776	2.25323	2.53045	1066.79	1061.1	1073.26
932	Line 15 20MAl09a-28307-area10	20MAL09a-28307	10	SLV	SLVa	49.64	24.55	0.169	0.097	6.33	13.51	4.6	0.051	0.85	99.816	1.85301	0.981794	0.0122304	0.0030666	0.197612	0.751843	0.202365	0.00150509	0.0238678	4.0273	0.791868	2.76698	2.60613	2.9332	1068.23	1062.23	1074.52
933	Line 16 20MAl09a-28307-area10	20MAL09a-28307	10	SLV	SLVa	49.69	24.57	0.192	0.08	6.42	13.53	4.51	0.041	0.821	99.853	1.85465	0.982473	0.0138932	0.00252885	0.200397	0.752863	0.198381	0.00120982	0.0230506	4.02945	0.789777	2.60956	2.45591	2.76308	1061.85	1056.33	1067.79
934	Line 17 20MAl09a-28307-area10	20MAL09a-28307	10	SLV	SLVa	49.71	24.66	0.235	0.091	6.26	13.52	4.41	0.047	0.814	99.751	1.85703	0.98694	0.0170197	0.00287909	0.195575	0.75297	0.194153	0.00138809	0.0228742	4.03083	0.793816	2.50436	2.38941	2.60878	1058.16	1052.87	1064.36
935	Line 18 20MAl09a-28307-area10	20MAL09a-28307	10	SLV	SLVa	49.69	24.53	0.152	0.085	6.21	13.39	4.42	0.047	0.721	99.245	1.86351	0.985558	0.0110513	0.00269973	0.194768	0.748632	0.195351	0.0013935	0.0203397	4.0233	0.793547	3.00644	2.88494	3.14413	1071.45	1064.65	1079.09
936	Line 19 20MAl09a-28307-area10	20MAL09a-28307	10	SLV	SLVa	49.9	24.6	0.204	0.093	6.19	13.35	4.38	0.044	0.673	99.434	1.86754	0.98634	0.0148016	0.00294775	0.193742	0.744862	0.193185	0.00130187	0.0189466	4.02367	0.793585	2.54892	2.40696	2.70749	1061.87	1054.98	1069.06
937	Line 20 20MAl09a-28307-area10	20MAL09a-28307	10	SLV	SLVa	49.94	24.66	0.195	0.08	6.19	13.36	4.3	0.086	0.627	99.438	1.86929	0.988878	0.0141505	0.00253604	0.193768	0.745519	0.189682	0.0025449	0.0176539	4.02402	0.793708	2.47208	2.33812	2.64001	1057.57	1051.41	1063.41
938	Line 21 20MAl09a-28307-area10	20MAL09a-28307	10	SLV	SLVa	49.86	24.56	0.16	0.091	6.22	13.43	4.2	0.098	0.64	99.275	1.86985	0.986747	0.0116328	0.00289025	0.195079	0.750856	0.185624	0.00290554	0.0180543	4.02364	0.793772	2.75367	2.63161	2.87027	1061.14	1054.25	1068.24
939	Line 22 20MAl09a-28307-area10	20MAL09a-28307	10	SLV	SLVa	50.17	24.67	0.146	0.101	6.01	13.35	3.98	0.065	0.611	99.102	1.88188	0.991376	0.0106172	0.00320854	0.188532	0.746541	0.175938	0.00192755	0.0172399	4.01726	0.798377	3.21415	3.09872	3.30524	1067.55	1058.78	1077.15
940	Line 23 20MAl09a-28307-area10	20MAL09a-28307	10	SLV	SLVa	50.56	24.6	0.17	0.1	5.65	13.81	3.86	0.047	0.589	99.396	1.88653	0.983365	0.0122974	0.00316007	0.176307	0.768203	0.169736	0.00138644	0.0165318	4.01752	0.813335	3.07079	2.8779	3.22744	1079.06	1070.63	1087.62
941	Line 24 20MAl09a-28307-area10	20MAL09a-28307	10	SLV	SLVa	50.53	24.75	0.177	0.08	5.77	13.68	3.83	0.054	0.578	99.449	1.88617	0.989756	0.0128089	0.00252906	0.180124	0.761276	0.168484	0.00159356	0.0162295	4.01897	0.808664	2.95214	2.7552	3.14126	1074.21	1066.12	1081.8
942	Line 25 20MAl09a-28307-area10	20MAL09a-28307	10	SLV	SLVa	50.4	24.7	0.185	0.067	5.69	13.7	3.85	0.088	0.586	99.269	1.88444	0.989395	0.0134101	0.0021216	0.177921	0.763653	0.169645	0.00260123	0.0164814	4.01966	0.811039	2.72113	2.53216	2.89648	1070.57	1063.93	1076.86
943	Line 26 20MAl09a-28307-area10	20MAL09a-28307	10	SLV	SLVa	50.39	24.77	0.193	0.093	5.72	13.77	3.82	0.075	0.574	99.405	1.88256	0.99141	0.0139788	0.00294257	0.178717	0.766945	0.168189	0.00221519	0.0161311	4.02309	0.811014	2.75794	2.55479	2.93651	1069.72	1062.72	1076.74
944	Line 27 20MAl09a-28307-area10	20MAL09a-28307	10	SLV	SLVa	50.34	24.69	0.171	0.066	5.73	13.76	3.87	0.052	0.594	99.273	1.8824	0.989102	0.0123966	0.00209017	0.179191	0.767082	0.170545	0.00153726	0.0167083	4.02105	0.810635	3.06243	2.86867	3.22073	1077.8	1069.06	1086.04
945	Line 28 20MAl09a-28307-area10	20MAL09a-28307	10	SLV	SLVa	50.47	24.8	0.224	0.08	5.72	13.76	3.88	0.055	0.575	99.568	1.88227	0.990882	0.0161959	0.00252684	0.178405	0.765053	0.170534	0.00162165	0.016131	4.02362	0.810903	2.7557	2.59894	2.90577	1068.29	1061.44	1074.4
946	Line 29 20MAl09a-28307-area10	20MAL09a-28307	10	SLV	SLVa	50.32	24.7	0.194	0.086	5.71	13.62	3.81	0.081	0.583	99.104	1.88522	0.99138	0.0140907	0.00272872	0.178904	0.760717	0.168219	0.00239911	0.0164299	4.02009	0.8096	2.6827	2.49024	2.85586	1068.64	1061.36	1074.96
947	Line 30 20MAl09a-28307-area10	20MAL09a-28307	10	SLV	SLVa	50.35	24.66	0.194	0.076	5.81	13.51	3.84	0.048	0.592	99.103	1.88686	0.990048	0.0140945	0.00241209	0.182088	0.754782	0.169591	0.00142209	0.0166882	4.01799	0.805642	2.77724	2.58277	2.94851	1069.57	1061.09	1076.49
948	Line 31 20MAl09a-28307-area10	20MAL09a-28307	10	SLV	SLVa	50.41	24.62	0.172	0.088	5.79	13.63	3.82	0.046	0.605	99.18	1.88664	0.987147	0.0124798	0.00278929	0.181223	0.760488	0.168487	0.00136105	0.0170323	4.01765	0.80756	2.96623	2.76259	3.1539	1076.01	1066.85	1084.69
949	Line 32 20MAl09a-28307-area10	20MAL09a-28307	10	SLV	SLVa	50.47	24.6	0.165	0.109	5.78	13.61	3.85	0.07	0.588	99.261	1.88738	0.985562	0.0119624	0.00345217	0.180767	0.75877	0.169675	0.00206952	0.0165406	4.01618	0.8076	2.99905	2.79919	3.159	1070.79	1060.72	1079.69
950	Line 33 20MAl09a-28307-area10	20MAL09a-28307	10	SLV	SLVa	50.27	24.69	0.216	0.072	5.77	13.56	3.81	0.07	0.579	99.064	1.88522	0.991967	0.0157042	0.00228678	0.180965	0.758121	0.168387	0.00207538	0.0163335	4.02106	0.807297	2.63283	2.44885	2.80329	1065.41	1058.09	1072.4
951	Line 1 20MAl09a-28307-area2A	20MAL09a-28307	2A	SLV	SLVa	50.06	24.75	0.247	0.092	6.1	13.82	4.15	0.094	0.633	99.97	1.86493	0.987798	0.0178392	0.00290267	0.190049	0.767545	0.1822	0.0027685	0.0177387	4.03377	0.801535	2.31111	2.22084	2.42949	1056.03	1050.79	1062.15
952	Line 2 20MAl09a-28307-area2A	20MAL09a-28307	2A	SLV	SLVa	50.24	24.69	0.21	0.07	5.83	14.06	4.04	0.081	0.587	99.808	1.87054	0.984828	0.0151581	0.00220726	0.18153	0.780418	0.177267	0.00238422	0.01644	4.03077	0.811289	2.61372	2.47094	2.76638	1066.39	1060.05	1072.15
953	Line 3 20MAl09a-28307-area2A	20MAL09a-28307	2A	SLV	SLVa	50.13	24.63	0.147	0.088	5.7	14.08	3.67	0.055	0.582	99.083	1.87929	0.989196	0.0106837	0.00279394	0.178704	0.786907	0.162141	0.00163006	0.0164121	4.02776	0.814932	2.93001	2.7606	3.11923	1087.01	1078.56	1094.45
954	Line 4 20MAl09a-28307-area2A	20MAL09a-28307	2A	SLV	SLVa	50.36	24.67	0.154	0.074	5.71	13.95	3.72	0.122	0.612	99.372	1.88173	0.987561	0.0111558	0.00234176	0.178432	0.777091	0.163812	0.00360394	0.0172017	4.02293	0.813263	2.61474	2.39883	2.84132	1078.44	1070.99	1085.44
955	Line 5 20MAl09a-28307-area2A	20MAL09a-28307	2A	SLV	SLVa	50.48	24.68	0.203	0.12	5.78	14.08	3.74	0.085	0.638	99.807	1.87896	0.98416	0.0146488	0.00378285	0.179924	0.781315	0.164059	0.00250128	0.0178635	4.02722	0.81282	2.57181	2.38853	2.76372	1065.19	1058.63	1071.47
956	Line 6 20MAl09a-28307-area2A	20MAL09a-28307	2A	SLV	SLVa	50.26	24.69	0.178	0.061	5.65	14.03	3.7	0.101	0.637	99.307	1.8794	0.9891	0.012904	0.00193181	0.176689	0.782131	0.163053	0.00298582	0.0179177	4.02611	0.815723	2.5532	2.37328	2.77862	1075.38	1069.41	1080.59
957	Line 7 20MAl09a-28307-area2A	20MAL09a-28307	2A	SLV	SLVa	50.24	24.65	0.168	0.096	5.72	14.01	3.77	0.056	0.656	99.366	1.8779	0.987099	0.0121742	0.00303901	0.178806	0.780701	0.166071	0.00165483	0.0184447	4.02588	0.813648	3.05613	2.86268	3.24879	1084.15	1075	1092.4
958	Line 8 20MAl09a-28307-area2A	20MAL09a-28307	2A	SLV	SLVa	50.05	24.71	0.181	0.094	5.72	14.05	3.78	0.04	0.66	99.285	1.8736	0.990986	0.0131359	0.00298016	0.179074	0.784105	0.166761	0.0011838	0.018585	4.03041	0.81408	2.90758	2.71232	3.10168	1083.77	1075.17	1092.33
959	Line 9 20MAl09a-28307-area2A	20MAL09a-28307	2A	SLV	SLVa	50.55	24.74	0.154	0.084	5.67	14.21	3.68	0.121	0.655	99.876	1.87935	0.98539	0.0110998	0.00264487	0.176292	0.787599	0.161237	0.00355645	0.0183178	4.02549	0.817104	2.62564	2.44021	2.85927	1082.1	1075.02	1088.42
960	Line 10 20MAl09a-28307-area2A	20MAL09a-28307	2A	SLV	SLVa	50.35	24.74	0.182	0.079	5.75	14.14	3.68	0.065	0.657	99.644	1.87747	0.988316	0.0131569	0.00249483	0.179311	0.786047	0.161716	0.00191616	0.0184283	4.02886	0.814255	2.81573	2.64011	3.00332	1078.71	1070.93	1085.39
961	Line 11 20MAl09a-28307-area2A	20MAL09a-28307	2A	SLV	SLVa	50.69	24.63	0.218	0.117	5.65	14.14	3.68	0.113	0.657	99.894	1.8831	0.980252	0.0157006	0.00368109	0.175535	0.783115	0.161112	0.00331875	0.0183596	4.02417	0.816894	2.43186	2.24461	2.6345	1064.74	1059.67	1069.62
962	Line 12 20MAl09a-28307-area2A	20MAL09a-28307	2A	SLV	SLVa	50.69	24.65	0.178	0.078	5.72	14.05	3.68	0.11	0.618	99.774	1.8853	0.982192	0.0128347	0.00245692	0.177917	0.779038	0.1613	0.00323441	0.0172899	4.02156	0.81408	2.45838	2.28044	2.6654	1072.72	1065.31	1078.8
963	Line 13 20MAl09a-28307-area2A	20MAL09a-28307	2A	SLV	SLVa	50.55	24.64	0.177	0.096	5.76	14.1	3.68	0.085	0.642	99.73	1.88198	0.982781	0.0127754	0.00302694	0.179341	0.782597	0.161463	0.00250183	0.0179794	4.02445	0.813563	2.59892	2.42504	2.80868	1074.71	1068.03	1081.16
964	Line 14 20MAl09a-28307-area2A	20MAL09a-28307	2A	SLV	SLVa	50.4	24.7	0.184	0.087	5.79	14.06	3.78	0.106	0.673	99.787	1.87666	0.985313	0.0132826	0.00274355	0.180301	0.780487	0.165874	0.00312037	0.0188502	4.02663	0.812341	2.62781	2.42434	2.8272	1073.1	1066.85	1079.62
965	Line 15 20MAl09a-28307-area2A	20MAL09a-28307	2A	SLV	SLVa	50.42	24.71	0.197	0.094	5.73	14	3.9	0.068	0.656	99.79	1.87658	0.985277	0.0142147	0.00296299	0.178354	0.776813	0.171064	0.00200086	0.018366	4.02563	0.813275	2.91318	2.74658	3.07075	1074.38	1067.04	1080.9
966	Line 16 20MAl09a-28307-area2A	20MAL09a-28307	2A	SLV	SLVa	50.42	24.7	0.196	0.091	5.97	13.98	3.92	0.102	0.653	100.032	1.87393	0.983489	0.0141226	0.00286438	0.185562	0.774609	0.171699	0.00299706	0.0182562	4.02753	0.806741	2.55452	2.39841	2.71006	1066.05	1059.59	1072.29
967	Line 17 20MAl09a-28307-area2A	20MAL09a-28307	2A	SLV	SLVa	48.9	24.56	0.229	0.08	6.45	13.26	4.96	0.215	0.864	99.519	1.83505	0.987391	0.0166603	0.00254254	0.202424	0.741835	0.219356	0.00637855	0.0243893	4.03602	0.785627	3.15581	2.88541	3.52238	1067.55	1063.53	1071.35
968	Line 18 20MAl09a-28307-area2A	20MAL09a-28307	2A	SLV	SLVa	49.02	24.54	0.173	0.071	6.47	13.34	4.96	0.214	0.865	99.654	1.83619	0.984782	0.0125631	0.00225238	0.20268	0.744945	0.218955	0.00633727	0.0243728	4.03308	0.786118	3.30863	2.98397	3.66328	1071.98	1067.84	1075.79
969	Line 19 20MAl09a-28307-area2A	20MAL09a-28307	2A	SLV	SLVa	49.11	24.56	0.209	0.077	6.44	13.43	4.86	0.25	0.863	99.81	1.83711	0.984273	0.0151572	0.00243947	0.201472	0.748973	0.214255	0.0073935	0.0242841	4.03536	0.788023	2.84831	2.54519	3.24949	1068.97	1062.75	1073.99
970	Line 20 20MAl09a-28307-area2A	20MAL09a-28307	2A	SLV	SLVa	49.12	24.54	0.204	0.085	6.14	13.33	4.86	0.237	0.869	99.392	1.84215	0.985967	0.0148322	0.00269975	0.192574	0.745282	0.214799	0.00702682	0.024515	4.02984	0.794666	2.807	2.53536	3.08426	1068.52	1062.39	1073.41
971	Line 21 20MAl09a-28307-area2A	20MAL09a-28307	2A	SLV	SLVa	49.2	24.49	0.183	0.092	6.17	13.35	4.82	0.233	0.891	99.429	1.84394	0.983315	0.0132966	0.00292017	0.193389	0.745913	0.212892	0.00690372	0.0251192	4.02769	0.794115	2.88034	2.55212	3.18941	1069.41	1063.97	1074.45
972	Line 22 20MAl09a-28307-area2A	20MAL09a-28307	2A	SLV	SLVa	49.16	24.6	0.189	0.072	6.15	13.48	4.87	0.246	0.882	99.661	1.83906	0.985921	0.0137074	0.00228116	0.192408	0.751796	0.214706	0.00727554	0.0248199	4.03198	0.796222	2.69707	2.44271	2.9726	1069.72	1063.68	1074.84
973	Line 23 20MAl09a-28307-area2A	20MAL09a-28307	2A	SLV	SLVa	49.02	24.55	0.205	0.079	6.2	13.3	4.92	0.248	0.885	99.413	1.83891	0.986645	0.014909	0.00250988	0.19451	0.743813	0.217512	0.00735502	0.0249733	4.03114	0.792704	2.74361	2.48917	3.01513	1069.65	1063.89	1074.31
974	Line 24 20MAl09a-28307-area2A	20MAL09a-28307	2A	SLV	SLVa	48.76	24.51	0.199	0.099	6.14	13.24	4.98	0.25	0.919	99.11	1.83526	0.988323	0.0145209	0.00315579	0.193271	0.742928	0.220899	0.00743907	0.0260193	4.03181	0.793558	2.73824	2.49231	2.99964	1068.92	1063.89	1074.23
975	Line 1 20MAL09a-28307-area2B	20MAL09a-28307	2B	SLV	SLVa	49.34	24.6	0.14	0.12	5.88	13.41	3.94	0.046	0.692	98.168	1.87081	0.999279	0.0102912	0.00385345	0.186454	0.758025	0.176058	0.0013789	0.019737	4.02588	0.802586	3.3243	3.19115	3.42913	1077.25	1068	1087.95
976	Line 2 20MAL09a-28307-area2B	20MAL09a-28307	2B	SLV	SLVa	49.58	24.57	0.222	0.097	5.82	13.3	3.84	0.07	0.657	98.156	1.87881	0.997476	0.0163094	0.00311305	0.184443	0.751367	0.171489	0.0020971	0.0187278	4.02383	0.802906	2.66488	2.48281	2.82485	1062.64	1055.34	1070.47
977	Line 3 20MAL09a-28307-area2B	20MAL09a-28307	2B	SLV	SLVa	49.29	24.56	0.175	0.102	5.84	13.46	3.89	0.033	0.707	98.057	1.87085	0.998691	0.0128774	0.00327884	0.185378	0.761642	0.174005	0.000990239	0.0201858	4.0279	0.804252	3.03775	2.82701	3.20849	1079.26	1067.44	1089.64
978	Line 4 20MAL09a-28307-area2B	20MAL09a-28307	2B	SLV	SLVa	49.83	24.61	0.174	0.087	5.72	13.36	3.92	0.102	0.675	98.508	1.87997	0.994702	0.0127267	0.00277982	0.180476	0.751434	0.174291	0.00304232	0.0191562	4.01857	0.806338	2.81185	2.63923	2.95613	1070.16	1063.75	1076.73
979	Line 10 20MAL09a-28307-area2B	20MAL09a-28307	2B	SLV	SLVa	50.43	24.64	0.238	0.114	5.69	14.07	3.96	0.074	0.675	99.902	1.87446	0.981181	0.0171503	0.00358864	0.176873	0.779661	0.173465	0.00217452	0.0188728	4.02742	0.815089	2.76743	2.60108	2.92226	1065.75	1059.88	1071.52
980	Line 11 20MAL09a-28307-area2B	20MAL09a-28307	2B	SLV	SLVa	50.27	24.56	0.203	0.083	5.92	13.95	4.2	0.048	0.702	99.937	1.86872	0.978107	0.0146299	0.00261308	0.184044	0.773099	0.183999	0.00141066	0.01963	4.02626	0.807715	2.78083	2.61707	2.94604	1071.18	1063.32	1078.23
981	Line 12 20MAL09a-28307-area2B	20MAL09a-28307	2B	SLV	SLVa	50.24	24.59	0.206	0.105	5.94	13.93	4.23	0.042	0.74	100.023	1.86664	0.978795	0.0148384	0.00330399	0.18457	0.771591	0.185217	0.00123369	0.0206818	4.02687	0.806968	2.73432	2.56864	2.9031	1070.8	1062.31	1078.65
982	Line 13 20MAL09a-28307-area2B	20MAL09a-28307	2B	SLV	SLVa	50.3	24.68	0.196	0.109	5.85	13.98	4.23	0.029	0.728	100.118	1.86684	0.981308	0.0141027	0.00342613	0.181576	0.773518	0.185016	0.000850905	0.0203243	4.02696	0.809887	2.8326	2.61823	3.02575	1078.95	1069.46	1088.12
983	Line 14 20MAL09a-28307-area2B	20MAL09a-28307	2B	SLV	SLVa	48.93	24.52	0.184	0.112	5.91	13.9	4.17	0.044	0.728	98.497	1.85124	0.993868	0.0134962	0.00358875	0.186998	0.784018	0.185931	0.00131609	0.0207188	4.04117	0.80742	2.95754	2.76689	3.13623	1072.82	1063.84	1081.81
984	Line 15 20MAL09a-28307-area2B	20MAL09a-28307	2B	SLV	SLVa	49.09	24.57	0.198	0.07	5.88	14.05	4.1	0.085	0.737	98.78	1.85158	0.992836	0.0144785	0.00223608	0.185478	0.790045	0.182249	0.00253463	0.0209105	4.04235	0.809868	2.64492	2.48057	2.82116	1069.17	1062.07	1075.89
985	Line 16 20MAL09a-28307-area2B	20MAL09a-28307	2B	SLV	SLVa	49.59	24.62	0.215	0.053	5.83	13.89	4.17	0.046	0.693	99.108	1.86124	0.989962	0.0156443	0.0016847	0.182996	0.777205	0.184448	0.00136493	0.0195654	4.03411	0.809419	2.67995	2.53041	2.82704	1067.48	1059.88	1074.16
986	Line 17 20MAL09a-28307-area2B	20MAL09a-28307	2B	SLV	SLVa	49.6	24.59	0.178	0.084	5.82	14.01	4.03	0.075	0.685	99.071	1.86251	0.989228	0.0129582	0.00267137	0.182769	0.784294	0.178341	0.0022265	0.0193487	4.03434	0.811006	2.96609	2.79911	3.12823	1075.81	1068.19	1083.22
987	Line 18 20MAL09a-28307-area2B	20MAL09a-28307	2B	SLV	SLVa	49.87	24.71	0.188	0.079	5.71	14	4.08	0.072	0.708	99.421	1.86463	0.989802	0.0136276	0.00250161	0.178547	0.780381	0.179781	0.00212829	0.0199128	4.03131	0.813805	2.95241	2.78901	3.1154	1076.83	1069.12	1083.53
988	Line 19 20MAL09a-28307-area2B	20MAL09a-28307	2B	SLV	SLVa	49.8	24.67	0.167	0.097	5.77	13.91	4.08	0.068	0.695	99.268	1.86546	0.990028	0.0121278	0.00307728	0.180757	0.776798	0.180114	0.00201377	0.0195834	4.02996	0.811231	3.1602	2.99286	3.2974	1079.79	1072.02	1088.62
989	Line 20 20MAL09a-28307-area2B	20MAL09a-28307	2B	SLV	SLVa	49.63	24.54	0.239	0.11	5.83	13.85	4.18	0.059	0.715	99.153	1.8619	0.986298	0.0173827	0.00349497	0.182913	0.774616	0.184807	0.00174988	0.0201773	4.03334	0.808974	2.70376	2.57969	2.8364	1064.22	1057.64	1071.08
990	Line 21 20MAL09a-28307-area2B	20MAL09a-28307	2B	SLV	SLVa	49.28	24.57	0.183	0.127	5.79	13.94	4.15	0.09	0.719	98.862	1.85593	0.99133	0.0133614	0.00405073	0.182362	0.78267	0.184191	0.00267965	0.0203688	4.03695	0.811031	2.77113	2.59908	2.93068	1065.66	1058.78	1072.27
991	Line 22 20MAL09a-28307-area2B	20MAL09a-28307	2B	SLV	SLVa	49.64	24.57	0.207	0.089	5.88	13.85	4.16	0.073	0.721	99.19	1.86186	0.987285	0.015052	0.00282712	0.184441	0.774444	0.183882	0.00216463	0.0203422	4.0323	0.807651	2.71216	2.54552	2.87308	1068.38	1061.42	1075
992	Line 23 20MAL09a-28307-area2B	20MAL09a-28307	2B	SLV	SLVa	50.26	24.67	0.203	0.092	5.75	13.75	4.03	0.049	0.707	99.515	1.87563	0.986318	0.0146869	0.00290772	0.179456	0.764986	0.17724	0.00144566	0.0198468	4.02252	0.809987	2.90253	2.7525	3.05467	1074.93	1066.69	1081.98
993	Line 24 20MAL09a-28307-area2B	20MAL09a-28307	2B	SLV	SLVa	50.17	24.58	0.228	0.126	5.82	13.83	4.12	0.059	0.703	99.639	1.87089	0.98199	0.0164834	0.00397936	0.181506	0.768866	0.181063	0.0017394	0.0197199	4.02623	0.809016	2.78598	2.66345	2.91906	1062.33	1055.55	1068.6
994	Line 25 20MAL09a-28307-area2B	20MAL09a-28307	2B	SLV	SLVa	50.38	24.44	0.199	0.122	5.76	13.78	4.05	0.04	0.699	99.471	1.87917	0.976631	0.0143903	0.00385395	0.179677	0.766269	0.17803	0.00117954	0.0196124	4.01881	0.810055	2.89852	2.73289	3.058	1070.68	1062.4	1079.22
995	Line 1 19CJ08m-28067-area1	19CJ08-28067	1	SLV	SLVt	51.81	25.04	0.082	0.065	3.75	15.64	2.36	0.079	0.473	99.299	1.91877	0.993493	0.0058875	0.00203873	0.116146	0.863516	0.103003	0.00231303	0.013177	4.01834	0.881443	1.78283	1.69142	1.88337	1137.42	1126.26	1150.44
996	Line 2 19CJ08m-28067-area1	19CJ08-28067	1	SLV	SLVt	52.07	25.06	0.092	0.091	3.67	15.58	2.32	0.121	0.456	99.465	1.924	0.992019	0.00659042	0.00284772	0.113409	0.858241	0.101026	0.00353466	0.0126744	4.01434	0.883282	1.73803	1.63735	1.88394	1140.3	1128.75	1154.92
997	Line 3 19CJ08m-28067-area1	19CJ08-28067	1	SLV	SLVt	51.49	25.01	0.103	0.084	3.72	15.6	2.43	0.126	0.449	99.013	1.91373	0.99585	0.00742171	0.00264409	0.115628	0.864386	0.106437	0.00370232	0.0125531	4.02236	0.882014	1.68529	1.59381	1.80021	1137.46	1124.17	1152.52
998	Line 4 19CJ08m-28067-area1	19CJ08-28067	1	SLV	SLVt	51.37	25	0.119	0.084	4.02	15.36	2.62	0.078	0.5	99.157	1.90911	0.995368	0.00857387	0.00264387	0.124943	0.851016	0.11475	0.00229172	0.0139778	4.02268	0.871979	1.91311	1.81185	2.01481	1106.97	1099.3	1118.15
999	Line 5 19CJ08m-28067-area1	19CJ08-28067	1	SLV	SLVt	51.2	24.95	0.102	0.063	4.34	15.06	2.89	0.098	0.522	99.226	1.90366	0.993829	0.00735238	0.0019838	0.13495	0.834774	0.126633	0.00288065	0.0145994	4.02066	0.860837	1.88455	1.80296	1.97195	1097.04	1093.61	1101.05
1000	Line 6 19CJ08m-28067-area1	19CJ08-28067	1	SLV	SLVt	50.9	25.05	0.121	0.07	4.2	15.2	2.87	0.116	0.544	99.086	1.89671	1.00003	0.00874132	0.00220912	0.130887	0.844407	0.126036	0.00341732	0.0152485	4.02769	0.865797	1.80357	1.72484	1.88383	1098.39	1094.08	1103.76
1001	Line 7 19CJ08m-28067-area1	19CJ08-28067	1	SLV	SLVt	50.8	25.05	0.11	0.084	4.31	15.06	2.9	0.139	0.52	98.972	1.89618	1.00172	0.00796007	0.00265542	0.134542	0.838041	0.127569	0.00410181	0.0146004	4.02737	0.861666	1.69313	1.61333	1.78302	1096.01	1091.71	1100.76
1002	Line 8 19CJ08m-28067-area1	19CJ08-28067	1	SLV	SLVt	51.29	24.93	0.18	0.082	4.32	15.1	2.88	0.118	0.536	99.453	1.90323	0.991065	0.0129491	0.00257698	0.134062	0.835333	0.125945	0.00346166	0.0149613	4.02358	0.861706	1.95148	1.87192	2.02901	1086.43	1081.91	1091.61
1003	Line 9 19CJ08m-28067-area1	19CJ08-28067	1	SLV	SLVt	51.08	25.01	0.093	0.081	4.36	15.14	2.86	0.159	0.507	99.302	1.89963	0.996444	0.00670515	0.00255118	0.135602	0.839398	0.125347	0.00467476	0.0141831	4.02453	0.860921	1.57869	1.4803	1.676	1094.93	1090.83	1099.69
1004	Line 10 19CJ08m-28067-area1	19CJ08-28067	1	SLV	SLVt	51.74	25	0.126	0.067	4.51	14.98	3.07	0.081	0.509	100.103	1.90647	0.986882	0.00900082	0.00209082	0.138977	0.822887	0.133313	0.00235957	0.0141081	4.01609	0.855513	2.11872	2.00628	2.27417	1090.31	1086.06	1094.86
1005	Line 11 19CJ08m-28067-area1	19CJ08-28067	1	SLV	SLVt	51.7	24.91	0.138	0.062	4.65	15.03	3.12	0.068	0.501	100.179	1.90402	0.982825	0.00985299	0.0019338	0.143218	0.82521	0.135415	0.00197986	0.0138792	4.01833	0.852113	2.39886	2.26132	2.64215	1088.33	1083.84	1093.11
1006	Line 13 19CJ08m-28067-area1	19CJ08-28067	1	SLV	SLVt	51.18	24.9	0.176	0.074	4.85	14.66	3.44	0.058	0.541	99.896	1.89387	0.987121	0.0126261	0.0023191	0.150091	0.808738	0.150016	0.00169677	0.0150589	4.02153	0.843464	3.1595	2.88161	3.37109	1079.6	1074.15	1084.66
1007	Line 14 19CJ08m-28067-area1	19CJ08-28067	1	SLV	SLVt	51.43	24.93	0.132	0.06	4.67	14.84	3.12	0.064	0.525	99.78	1.90297	0.988232	0.00946884	0.0018802	0.144509	0.818603	0.13605	0.00187214	0.0146124	4.01819	0.849956	2.35329	2.2385	2.61532	1089.37	1084.97	1093.3
1008	Line 15 19CJ08m-28067-area1	19CJ08-28067	1	SLV	SLVt	51.59	24.97	0.17	0.074	4.73	14.82	3.21	0.05	0.52	100.147	1.90224	0.986369	0.0121522	0.00231084	0.145856	0.814652	0.139487	0.00145752	0.0144228	4.01894	0.848147	2.70981	2.45311	2.90877	1083.05	1077.79	1088.01
1009	Line 16 19CJ08m-28067-area1	19CJ08-28067	1	SLV	SLVt	51.65	24.94	0.116	0.08	4.72	14.76	3.18	0.044	0.56	100.071	1.90512	0.98553	0.00829503	0.00249908	0.145599	0.811639	0.138232	0.00128307	0.0155377	4.01373	0.847897	2.54077	2.33663	2.76148	1093.43	1089.07	1097.4
1010	Line 17 19CJ08m-28067-area1	19CJ08-28067	1	SLV	SLVt	52.57	25.06	0.152	0.066	3.98	15.36	2.52	0.109	0.471	100.29	1.92669	0.983959	0.0108001	0.0020486	0.121989	0.839248	0.108844	0.00315824	0.012985	4.00972	0.873092	2.0692	1.94124	2.1916	1107.98	1098.66	1121.05
1011	Line 18 19CJ08m-28067-area1	19CJ08-28067	1	SLV	SLVt	52.9	25	0.095	0.08	3.66	15.66	2.36	0.104	0.457	100.336	1.9338	0.979079	0.00673267	0.00247676	0.111892	0.853439	0.101671	0.00300562	0.0125666	4.00466	0.884089	1.76456	1.64996	1.94147	1142.29	1129.55	1156.58
1012	Line 19 19CJ08m-28067-area1	19CJ08-28067	1	SLV	SLVt	52.76	25.05	0.115	0.043	3.63	15.76	2.35	0.055	0.448	100.21	1.93108	0.982256	0.00816021	0.00133291	0.111113	0.859956	0.101366	0.00159148	0.0123344	4.00919	0.885577	2.16943	2.01704	2.41713	1148.2	1137.31	1161.42
1013	Line 20 19CJ08m-28067-area1	19CJ08-28067	1	SLV	SLVt	52.71	25.06	0.158	0.084	3.67	15.54	2.33	0.072	0.431	100.054	1.93335	0.98474	0.0112353	0.00260938	0.112577	0.849756	0.100717	0.00208783	0.0118916	4.00897	0.883017	2.37445	2.21441	2.56939	1136.96	1124.59	1149.79
1014	Line 21 19CJ08m-28067-area1	19CJ08-28067	1	SLV	SLVt	52.51	24.97	0.099	0.061	3.66	15.47	2.37	0.079	0.451	99.67	1.93283	0.984675	0.00706473	0.00190161	0.112667	0.848921	0.102809	0.00229892	0.0124875	4.00566	0.882832	1.867	1.757	2.02546	1143.03	1132.21	1155.5
1015	Line 22 19CJ08m-28067-area1	19CJ08-28067	1	SLV	SLVt	52.5	25.13	0.103	0.066	3.7	15.66	2.39	0.073	0.431	100.052	1.92686	0.988109	0.00732885	0.00205151	0.113568	0.856854	0.103376	0.00211816	0.0118991	4.01216	0.882971	1.82502	1.71733	1.97148	1146.54	1133.82	1159.46
1016	Line 23 19CJ08m-28067-area1	19CJ08-28067	1	SLV	SLVt	52.54	25.1	0.103	0.091	3.71	15.69	2.36	0.094	0.417	100.111	1.92747	0.986489	0.00732558	0.00282733	0.113824	0.858113	0.102033	0.00272627	0.0115074	4.01231	0.882889	1.74504	1.64042	1.88928	1142.11	1128.97	1156.06
1017	Line 24 19CJ08m-28067-area1	19CJ08-28067	1	SLV	SLVt	52.58	25.01	0.102	0.078	3.61	15.55	2.37	0.055	0.425	99.78	1.93292	0.984983	0.00726945	0.00242844	0.110985	0.852213	0.102677	0.00159846	0.0117524	4.00683	0.884775	1.90674	1.7718	2.1249	1146.75	1135.93	1159.41
1018	Line 25 19CJ08m-28067-area1	19CJ08-28067	1	SLV	SLVt	52.52	25.02	0.076	0.078	3.69	15.64	2.31	0.09	0.42	99.843	1.93078	0.98541	0.00541664	0.00242852	0.113448	0.857175	0.100081	0.00261574	0.0116146	4.00897	0.883118	1.74873	1.64039	1.89092	1142.4	1130.87	1156.22
1019	Line 26 19CJ08m-28067-area1	19CJ08-28067	1	SLV	SLVt	52.55	25.03	0.094	0.096	3.53	15.56	2.31	0.091	0.416	99.702	1.93371	0.986738	0.00670587	0.00299177	0.108632	0.853598	0.100175	0.00264731	0.0115149	4.00671	0.887104	1.97815	1.80194	2.25134	1154.54	1143.04	1166.19
1020	Line 27 19CJ08m-28067-area1	19CJ08-28067	1	SLV	SLVt	52.73	25.04	0.126	0.075	3.58	15.68	2.26	0.082	0.428	100.013	1.93412	0.983972	0.00895995	0.00232984	0.109818	0.857428	0.0976934	0.00237785	0.0118091	4.00851	0.886463	2.23483	2.01671	2.51543	1150.08	1138.11	1163.32
1021	Line 1 19CJ08m-28067-area22	19CJ08-28067	22	SLV	SLVt	44.45	24.06	0.212	0.068	8.65	11.02	8.23	0.031	1.82	98.657	1.71043	0.991863	0.0158153	0.00221606	0.278364	0.63218	0.373219	0.000943063	0.0526807	4.05771	0.694288	2.56946	2.1777	2.93859	1059.98	1056.44	1064.44
1022	Line 2 19CJ08m-28067-area22	19CJ08-28067	22	SLV	SLVt	48.65	24.38	0.144	0.062	6.4	13.03	5.5	0.062	1.13	99.358	1.82569	0.980165	0.0104765	0.00197049	0.200857	0.728976	0.243241	0.00183942	0.0318984	4.02511	0.783986	2.49184	2.35067	2.60028	1065.81	1060.47	1071.98
1023	Line 3 19CJ08m-28067-area22	19CJ08-28067	22	SLV	SLVt	46.64	24.32	0.195	0.078	7.51	12.38	5.71	0	1.306	98.139	1.78943	0.999633	0.0145043	0.00253448	0.240968	0.70811	0.258179	0	0.0376916	4.05105	0.746103	2.07242	1.94244	2.22062	1055.04	1050.16	1060.34
1024	Line 4 19CJ08m-28067-area22	19CJ08-28067	22	SLV	SLVt	47.93	24.24	0.194	0.089	6.98	12.57	5.54	0.019	1.226	98.787	1.81634	0.984109	0.0142528	0.00285639	0.221212	0.710148	0.247417	0.000569229	0.0349483	4.03185	0.762485	2.14981	2.03033	2.2727	1063.27	1058.05	1070.64
1025	Line 5 19CJ08m-28067-area22	19CJ08-28067	22	SLV	SLVt	48.05	24.5	0.15	0.071	6.75	12.92	5.29	0.027	1.133	98.921	1.81838	0.993299	0.011005	0.00227556	0.213629	0.728919	0.235927	0.000807794	0.0322529	4.0365	0.77335	2.42418	2.29061	2.52139	1068.73	1063.47	1075.64
1026	Line 6 19CJ08m-28067-area22	19CJ08-28067	22	SLV	SLVt	47.32	24.49	0.192	0.066	7.1	12.54	5.48	0	1.195	98.392	1.80569	1.00117	0.0142039	0.00213295	0.226579	0.713379	0.246438	0	0.0343014	4.04389	0.758948	2.18268	2.03248	2.3444	1056.37	1052.54	1061.23
1027	Line 7 19CJ08m-28067-area22	19CJ08-28067	22	SLV	SLVt	47.26	24.42	0.175	0.07	7.35	12.43	5.81	0.023	1.335	98.881	1.79588	0.994148	0.0128923	0.00225279	0.233579	0.704173	0.260189	0.000690965	0.0381602	4.04197	0.750916	2.25767	2.11545	2.38691	1059.64	1053.73	1066.57
1028	Line 8 19CJ08m-28067-area22	19CJ08-28067	22	SLV	SLVt	47.33	24.46	0.186	0.097	7.01	12.59	5.52	0.047	1.249	98.489	1.8036	0.998578	0.0137412	0.0031305	0.223401	0.715244	0.247898	0.00141595	0.0358024	4.04281	0.761996	2.12079	1.97535	2.26175	1063.82	1057.09	1069.91
1029	Line 9 19CJ08m-28067-area22	19CJ08-28067	22	SLV	SLVt	47.77	24.48	0.182	0.07	6.78	12.92	5.37	0.076	1.194	98.872	1.81047	0.993961	0.0133726	0.00224684	0.214896	0.730001	0.23985	0.00227716	0.0340398	4.04111	0.772572	2.19195	2.01516	2.35123	1054.6	1050.45	1061.03
1030	Line 10 19CJ08m-28067-area22	19CJ08-28067	22	SLV	SLVt	47.2	24.35	0.122	0.056	7.07	12.66	5.68	0	1.248	98.415	1.79973	0.994684	0.00901846	0.00180839	0.225449	0.719653	0.255237	0	0.0357952	4.04137	0.761456	2.36448	2.24755	2.52988	1061	1056.85	1065.52
1031	Line 11 19CJ08m-28067-area22	19CJ08-28067	22	SLV	SLVt	47.42	24.5	0.172	0.076	7.23	12.53	5.74	0.028	1.266	98.961	1.79928	0.995923	0.0126524	0.00244225	0.229424	0.708784	0.256673	0.000839925	0.0361341	4.04215	0.755465	2.26838	2.1319	2.40365	1061.51	1056.07	1067.69
1032	Line 12 19CJ08m-28067-area22	19CJ08-28067	22	SLV	SLVt	47.79	24.44	0.16	0.076	6.86	12.76	5.51	0.057	1.291	98.945	1.80917	0.991209	0.0117428	0.00243666	0.217185	0.720141	0.245824	0.00170593	0.0367633	4.03618	0.768293	2.19554	2.07328	2.34485	1061.84	1056.18	1068.81
1033	Line 13 19CJ08m-28067-area22	19CJ08-28067	22	SLV	SLVt	48.46	24.44	0.139	0.074	6.37	13.06	5.14	0.12	1.179	99.006	1.82753	0.987424	0.0101626	0.00236347	0.200902	0.734258	0.228441	0.00357772	0.0334457	4.0281	0.785169	2.18585	1.9927	2.35349	1072.18	1067.44	1076.6
1034	Line 14 19CJ08m-28067-area22	19CJ08-28067	22	SLV	SLVt	48.59	24.56	0.129	0.075	6.29	13.17	4.99	0.115	1.124	99.047	1.83101	0.991505	0.00942416	0.00239356	0.198225	0.73987	0.221603	0.003426	0.0318609	4.02932	0.788694	2.22593	2.0639	2.3489	1075.22	1071.12	1080.1
1035	Line 15 19CJ08m-28067-area22	19CJ08-28067	22	SLV	SLVt	48.05	24.51	0.126	0.114	6.86	12.88	5.25	0	1.11	98.906	1.81931	0.994213	0.00924897	0.00365559	0.217221	0.727035	0.234263	0	0.0316143	4.03656	0.769955	2.53372	2.3883	2.6298	1066.01	1062.29	1071.61
1036	Line 16 19CJ08m-28067-area22	19CJ08-28067	22	SLV	SLVt	48.73	24.62	0.186	0.085	6.74	13.09	4.95	0.023	0.96	99.407	1.83354	0.992441	0.013568	0.00270865	0.212089	0.734276	0.219498	0.000684175	0.0271714	4.03598	0.775891	2.30877	2.2046	2.43639	1065.32	1060.46	1070.87
1037	Line 17 19CJ08m-28067-area22	19CJ08-28067	22	SLV	SLVt	48.93	24.51	0.149	0.108	6.64	13.2	4.75	0	0.922	99.227	1.84213	0.988576	0.0108753	0.00344356	0.209063	0.740873	0.210751	0	0.0261109	4.03182	0.779919	2.76229	2.65173	2.8747	1066.97	1062.53	1071.73
1038	Line 18 19CJ08m-28067-area22	19CJ08-28067	22	SLV	SLVt	48.56	24.49	0.188	0.088	6.73	13.07	4.86	0.028	0.988	99.004	1.83432	0.991079	0.0137678	0.00281526	0.212606	0.736034	0.216353	0.000836181	0.0280738	4.03589	0.775883	2.30795	2.19196	2.45174	1064.78	1059.81	1070.26
1039	Line 1 19CJ08m-28067-area21B	19CJ08-28067	21B	SLV	SLVt	49.81	24.29	0.129	0.086	6.34	13.7	3.89	0.046	0.897	99.19	1.86966	0.976776	0.00938737	0.0027339	0.199021	0.766639	0.172078	0.00136505	0.025327	4.02299	0.793902	3.28785	3.14487	3.39262	1077.09	1068.44	1086.58
1040	Line 2 19CJ08m-28067-area21B	19CJ08-28067	21B	SLV	SLVt	48.67	24.13	0.166	0.097	7.32	13.18	4.65	0.041	1.089	99.355	1.83531	0.974828	0.0121357	0.00309784	0.230846	0.74095	0.206648	0.0012223	0.0308903	4.03593	0.762454	2.28005	2.1406	2.4132	1060.15	1056.34	1064.11
1041	Line 3 19CJ08m-28067-area21B	19CJ08-28067	21B	SLV	SLVt	49.52	24.21	0.194	0.102	6.69	13.68	4.13	0.022	0.943	99.522	1.85716	0.972715	0.0141052	0.00323972	0.209826	0.764856	0.182536	0.000652284	0.0266028	4.03169	0.784724	2.66626	2.47618	2.85524	1057.54	1052.48	1063.64
1042	Line 4 19CJ08m-28067-area21B	19CJ08-28067	21B	SLV	SLVt	48.81	24.28	0.195	0.098	7.26	13.04	4.87	0	1.032	99.628	1.83522	0.978027	0.0142142	0.00312065	0.228287	0.730942	0.215794	0	0.0291881	4.0348	0.76201	2.20629	2.06874	2.33856	1056.01	1052.54	1059.67
1043	Line 5 19CJ08m-28067-area21B	19CJ08-28067	21B	SLV	SLVt	48.81	24.19	0.143	0.116	7.28	13.14	4.72	0.038	1.038	99.521	1.83726	0.975483	0.0104353	0.00369793	0.22917	0.737364	0.209379	0.00113081	0.0293904	4.03331	0.762896	2.45115	2.34059	2.5642	1063.69	1060.19	1067.2
1044	Line 6 19CJ08m-28067-area21B	19CJ08-28067	21B	SLV	SLVt	49.79	24.23	0.109	0.095	6.38	13.86	4.02	0.036	0.876	99.426	1.86491	0.972282	0.00791501	0.00301355	0.199849	0.773936	0.177449	0.00106602	0.0246812	4.0251	0.794771	3.37152	3.25704	3.45342	1083.49	1074.58	1094.37
1045	Line 7 19CJ08m-28067-area21B	19CJ08-28067	21B	SLV	SLVt	50.68	24.3	0.082	0.092	5.98	14.24	3.55	0.078	0.778	99.788	1.88496	0.968261	0.00591271	0.00289795	0.186007	0.789586	0.155605	0.00229353	0.0217666	4.01729	0.80934	2.72187	2.50305	2.88836	1094.21	1085.48	1102.46
1046	Line 8 19CJ08m-28067-area21B	19CJ08-28067	21B	SLV	SLVt	51.55	24.45	0.078	0.107	5.26	14.76	2.82	0.088	0.647	99.772	1.91013	0.970587	0.0056032	0.00335781	0.162998	0.815351	0.123144	0.00257787	0.0180337	4.01178	0.833395	1.65117	1.46879	1.82471	1088.24	1082.95	1093.19
1047	Line 9 19CJ08m-28067-area21B	19CJ08-28067	21B	SLV	SLVt	51.98	24.48	0.096	0.117	5.15	14.73	2.73	0.089	0.591	99.963	1.91967	0.968553	0.00687337	0.00365944	0.15906	0.810994	0.118818	0.00259851	0.0164181	4.00664	0.83603	1.79884	1.66653	1.91592	1083.77	1078.06	1088.21
1048	Line 10 19CJ08m-28067-area21B	19CJ08-28067	21B	SLV	SLVt	52.09	24.79	0.141	0.118	5.05	14.88	2.58	0.03	0.545	100.226	1.9198	0.978816	0.0100747	0.00368318	0.155653	0.81758	0.11206	0.000874116	0.0151093	4.01366	0.840066	2.01903	1.92646	2.1349	1087.4	1082.42	1092.85
1049	Line 11 19CJ08m-28067-area21B	19CJ08-28067	21B	SLV	SLVt	51.85	24.64	0.126	0.112	5.26	14.92	2.77	0.068	0.603	100.349	1.91045	0.972636	0.0090005	0.00349498	0.162083	0.819561	0.120281	0.0019808	0.0167129	4.0162	0.834886	1.8988	1.72358	2.0296	1081.67	1076.3	1087.84
1050	Line 12 19CJ08m-28067-area21B	19CJ08-28067	21B	SLV	SLVt	51.95	24.76	0.14	0.114	5.21	14.76	2.69	0	0.583	100.207	1.91636	0.978506	0.0100122	0.00356151	0.160728	0.811713	0.116943	0	0.0161773	4.014	0.834717	2.22654	2.08749	2.33219	1084.28	1078.72	1089.28
1051	Line 13 19CJ08m-28067-area21B	19CJ08-28067	21B	SLV	SLVt	51.86	24.65	0.131	0.102	5.22	14.75	2.74	0.034	0.596	100.099	1.9151	0.975209	0.00937861	0.00319005	0.16121	0.812037	0.119245	0.000992619	0.0165558	4.01292	0.834358	2.04174	1.87132	2.15759	1091.66	1085.17	1097.74
1052	Line 14 19CJ08m-28067-area21B	19CJ08-28067	21B	SLV	SLVt	52.17	24.86	0.111	0.081	4.96	14.92	2.56	0.028	0.57	100.26	1.92088	0.980623	0.00792338	0.00252582	0.15273	0.818979	0.111083	0.000815046	0.015787	4.01135	0.842823	1.89578	1.79241	1.99579	1099.39	1095.95	1102.49
1053	Line 15 19CJ08m-28067-area21B	19CJ08-28067	21B	SLV	SLVt	51.98	24.76	0.142	0.11	4.93	14.97	2.59	0.047	0.559	100.101	1.9177	0.978625	0.0101564	0.00343697	0.152109	0.823361	0.112609	0.00137084	0.0155132	4.01488	0.844066	1.97542	1.84429	2.08084	1083.64	1079.58	1088.08
1054	Line 16 19CJ08m-28067-area21B	19CJ08-28067	21B	SLV	SLVt	52.18	24.77	0.111	0.093	5.08	14.85	2.65	0.046	0.574	100.357	1.91988	0.976377	0.00791773	0.00289795	0.156314	0.814556	0.114907	0.00133805	0.0158865	4.01007	0.838996	1.90321	1.78276	2.01213	1091.96	1087.94	1095.18
1055	Line 17 19CJ08m-28067-area21B	19CJ08-28067	21B	SLV	SLVt	51.55	24.8	0.141	0.101	5.62	14.46	2.94	0	0.626	100.237	1.90588	0.982291	0.0101063	0.00316247	0.173767	0.797003	0.128098	0	0.0174095	4.01772	0.821001	2.14527	1.93719	2.29776	1086.42	1079.47	1093.39
1056	Line 18 19CJ08m-28067-area21B	19CJ08-28067	21B	SLV	SLVt	51.19	24.64	0.164	0.121	6.05	14.27	3.3	0	0.688	100.47	1.89311	0.976231	0.0117582	0.00378978	0.187115	0.786754	0.143825	0	0.0191392	4.02172	0.807864	2.11141	1.90662	2.38253	1070.43	1061.32	1079.43
1057	Line 19 19CJ08m-28067-area21B	19CJ08-28067	21B	SLV	SLVt	50.88	24.6	0.122	0.107	5.99	14.2	3.22	0	0.662	99.783	1.89391	0.980998	0.00880399	0.00337314	0.186467	0.787997	0.141253	0	0.018536	4.02133	0.808647	2.13509	1.95676	2.29808	1083.82	1073.15	1094.54
1058	Line 20 19CJ08m-28067-area21B	19CJ08-28067	21B	SLV	SLVt	51.23	24.63	0.129	0.109	5.51	14.46	3.02	0	0.665	99.795	1.90248	0.979898	0.00928737	0.00342815	0.171124	0.800549	0.13217	0	0.0185764	4.01751	0.823888	2.03978	1.87583	2.22479	1093.98	1085.53	1100.76
1059	Line 21 19CJ08m-28067-area21B	19CJ08-28067	21B	SLV	SLVt	51.49	24.68	0.124	0.111	5.37	14.6	3.09	0	0.645	100.11	1.90323	0.977316	0.00888583	0.0034748	0.165999	0.804537	0.134604	0	0.0179339	4.01598	0.828961	2.1693	1.96463	2.32848	1094.66	1088.11	1101.35
1060	Line 22 19CJ08m-28067-area21B	19CJ08-28067	21B	SLV	SLVt	49.21	24.48	0.171	0.071	6.38	13.57	4.89	0.035	1.014	99.85	1.83792	0.979503	0.0123816	0.00224579	0.199277	0.755574	0.215234	0.00103344	0.0284876	4.03165	0.791301	2.37167	2.24522	2.48421	1069.91	1064.32	1076.31
1061	Line 23 19CJ08m-28067-area21B	19CJ08-28067	21B	SLV	SLVt	47.56	24.42	0.166	0.099	7.11	12.66	6.23	0.029	1.3	99.59	1.79078	0.985071	0.0121176	0.003157	0.223889	0.710655	0.276451	0.000863263	0.0368205	4.0398	0.760429	2.18194	2.03583	2.34742	1066.52	1059.76	1072
1062	Line 24 19CJ08m-28067-area21B	19CJ08-28067	21B	SLV	SLVt	46.82	24.42	0.155	0.072	7.35	12.23	6.36	0.021	1.402	98.83	1.78057	0.994937	0.0114279	0.00231899	0.233765	0.693393	0.285046	0.000631382	0.0401072	4.0422	0.747869	2.26727	2.08909	2.42709	1063.41	1057.01	1070.92
1063	Line 25 19CJ08m-28067-area21B	19CJ08-28067	21B	SLV	SLVt	46.62	24.35	0.164	0.098	7.64	12.04	6.47	0.023	1.374	98.808	1.77668	0.994166	0.0121169	0.00316303	0.243498	0.684052	0.290584	0.000692964	0.0393886	4.04435	0.737483	2.31575	2.09528	2.52231	1068.3	1063.26	1073.97
1064	Line 26 19CJ08m-28067-area21B	19CJ08-28067	21B	SLV	SLVt	47.04	24.43	0.164	0.077	7.33	12.1	6.22	0.032	1.312	98.735	1.79026	0.996081	0.0121004	0.00248187	0.233301	0.68653	0.278978	0.000962818	0.0375603	4.03826	0.746365	2.32574	2.15001	2.52205	1066.66	1060.9	1072.54
1065	Line 27 19CJ08m-28067-area21B	19CJ08-28067	21B	SLV	SLVt	47.88	24.48	0.14	0.114	6.79	12.69	5.81	0.035	1.196	99.134	1.80762	0.990119	0.0102469	0.003645	0.214382	0.714234	0.2585	0.00104464	0.033965	4.03376	0.769139	2.3677	2.23776	2.49147	1069.47	1062.03	1077.62
1066	Line 28 19CJ08m-28067-area21B	19CJ08-28067	21B	SLV	SLVt	47.88	24.48	0.149	0.112	6.84	12.72	5.77	0.026	1.183	99.17	1.80771	0.990165	0.0109061	0.00358122	0.21597	0.715956	0.256732	0.000776055	0.0335974	4.03539	0.768254	2.38942	2.27374	2.48782	1069.2	1063.27	1076.2
1067	Line 29 19CJ08m-28067-area21B	19CJ08-28067	21B	SLV	SLVt	48.04	24.5	0.13	0.115	6.75	12.86	5.81	0.027	1.192	99.445	1.80756	0.987591	0.00948289	0.00366459	0.212401	0.721365	0.257629	0.000803152	0.0337374	4.03423	0.772533	2.39136	2.26358	2.50374	1070.81	1064.5	1079.06
1068	Line 30 19CJ08m-28067-area21B	19CJ08-28067	21B	SLV	SLVt	47.92	24.47	0.14	0.071	6.82	12.7	5.81	0.05	1.194	99.174	1.80814	0.989169	0.0102412	0.00226888	0.21521	0.714403	0.258357	0.00149152	0.0338895	4.03317	0.768495	2.43406	2.26763	2.56625	1064.38	1057.93	1072.11
1069	Line 31 19CJ08m-28067-area21B	19CJ08-28067	21B	SLV	SLVt	48.19	24.47	0.134	0.094	6.7	12.81	5.72	0.042	1.163	99.323	1.81374	0.986674	0.00977757	0.00299629	0.21089	0.718773	0.253714	0.00124972	0.0329264	4.03074	0.773154	2.3979	2.26899	2.4947	1070.46	1063.39	1078.49
1070	Line 32 19CJ08m-28067-area21B	19CJ08-28067	21B	SLV	SLVt	48.07	24.47	0.146	0.111	6.48	12.71	5.75	0.117	1.158	99.012	1.81392	0.989235	0.0106808	0.00354736	0.204495	0.715013	0.255706	0.00349039	0.0328699	4.02895	0.777604	2.56426	2.35453	2.72485	1066.89	1060.77	1072.55
1071	Line 33 19CJ08m-28067-area21B	19CJ08-28067	21B	SLV	SLVt	47.72	24.37	0.193	0.095	6.57	12.8	6	0.146	1.29	99.195	1.79947	0.984516	0.0141095	0.00303394	0.207193	0.719582	0.266641	0.00435254	0.0365916	4.03549	0.776437	2.20721	1.97794	2.50247	1069.21	1063.84	1078.03
1072	Line 3 19CJ08m-28067-area21C	19CJ08-28067	21C	SLV	SLVt	43.33	23.94	0.202	0.078	9.18	10.41	8.56	0.067	2.02	98.094	1.688	0.999149	0.0152561	0.00257346	0.299082	0.604588	0.392996	0.0020635	0.0591945	4.0629	0.669036	1.94755	1.63089	2.28644	1066.23	1060.29	1071.45
1073	Line 4 19CJ08m-28067-area21C	19CJ08-28067	21C	SLV	SLVt	44.62	24.24	0.187	0.1	8.73	10.79	7.96	0.078	1.85	98.564	1.71826	1.00003	0.0139608	0.00326135	0.281149	0.619449	0.361245	0.00237464	0.0535892	4.05332	0.687819	2.19794	1.87007	2.51057	1077.47	1071.77	1081.8
1074	Line 5 19CJ08m-28067-area21C	19CJ08-28067	21C	SLV	SLVt	45.21	24.17	0.28	0.116	8.22	11.11	7.31	0.033	1.74	98.19	1.74219	0.99784	0.0209184	0.00378581	0.26491	0.638265	0.331978	0.00100536	0.050438	4.05133	0.706691	2.03168	1.58114	2.47302	1073.32	1068.35	1077.6
1075	Line 9 19CJ08m-28067-area21C	19CJ08-28067	21C	SLV	SLVt	47.59	24.4	0.187	0.077	6.9	12.44	5.5	0.048	1.166	98.308	1.81391	0.99635	0.0138182	0.00248559	0.219944	0.706879	0.247054	0.00144639	0.0334306	4.03532	0.76269	2.22044	2.07686	2.36367	1062.11	1055.7	1067.71
1076	Line 10 19CJ08m-28067-area21C	19CJ08-28067	21C	SLV	SLVt	50.2	24.57	0.144	0.101	5.85	14.04	3.82	0.029	0.781	99.548	1.87391	0.982591	0.0104212	0.00319305	0.182627	0.781335	0.16805	0.000855832	0.0219302	4.02492	0.810546	3.34516	3.13246	3.47534	1103.06	1089.71	1115.12
1077	Line 11 19CJ08m-28067-area21C	19CJ08-28067	21C	SLV	SLVt	50.42	24.53	0.126	0.088	5.75	14.19	3.71	0.033	0.722	99.581	1.87943	0.979588	0.00910548	0.00277808	0.179248	0.788554	0.162978	0.000972485	0.0202445	4.0229	0.814788	3.13609	2.95219	3.36124	1109.23	1097.35	1119.47
1078	Line 12 19CJ08m-28067-area21C	19CJ08-28067	21C	SLV	SLVt	50.76	24.64	0.145	0.086	5.61	14.34	3.52	0.05	0.698	99.864	1.88544	0.980513	0.0104416	0.00270538	0.174268	0.794081	0.154086	0.00146827	0.0195026	4.0225	0.820036	2.83956	2.60785	3.01435	1093.98	1086.43	1101.56
1079	Line 13 19CJ08m-28067-area21C	19CJ08-28067	21C	SLV	SLVt	51.32	24.68	0.096	0.096	5.34	14.68	2.86	0.07	0.661	99.803	1.90381	0.980852	0.00690424	0.0030161	0.165669	0.811872	0.125035	0.00205295	0.0184452	4.01765	0.830525	1.70002	1.54926	1.88311	1094.02	1089.34	1098.68
1080	Line 14 19CJ08m-28067-area21C	19CJ08-28067	21C	SLV	SLVt	51.3	24.59	0.128	0.118	5.54	14.55	2.69	0	0.668	99.602	1.90881	0.980223	0.00923342	0.00371848	0.172392	0.807109	0.117958	0	0.0186968	4.01814	0.824	1.91208	1.6924	2.19923	1086.37	1078.21	1094.02
1081	Line 15 19CJ08m-28067-area21C	19CJ08-28067	21C	SLV	SLVt	51.03	24.61	0.121	0.117	5.75	14.45	2.85	0	0.657	99.607	1.90151	0.982442	0.00874112	0.00369231	0.179186	0.802724	0.125155	0	0.0184156	4.02187	0.817512	1.9999	1.78092	2.27087	1086.11	1077.99	1094.94
1082	Line 16 19CJ08m-28067-area21C	19CJ08-28067	21C	SLV	SLVt	51.31	24.64	0.167	0.078	5.65	14.58	2.72	0	0.644	99.789	1.90644	0.98081	0.0120295	0.00245446	0.175564	0.807615	0.119103	0	0.0179992	4.02202	0.821433	1.99166	1.73642	2.21355	1077.47	1070.45	1083.45
1083	Line 17 19CJ08m-28067-area21C	19CJ08-28067	21C	SLV	SLVt	50.73	24.6	0.117	0.081	5.94	14.18	3.19	0	0.694	99.541	1.89306	0.98346	0.00846435	0.0025599	0.185374	0.788861	0.140288	0	0.0194807	4.02155	0.809723	2.08896	1.87739	2.2426	1089.08	1079.13	1099.94
1084	Line 18 19CJ08m-28067-area21C	19CJ08-28067	21C	SLV	SLVt	50.51	24.44	0.15	0.101	6.14	14.17	3.28	0	0.713	99.535	1.88746	0.978417	0.0108668	0.0031964	0.191881	0.789397	0.144446	0	0.0200418	4.02571	0.804458	2.0688	1.90375	2.31707	1074.35	1065.38	1084.7
1085	Line 19 19CJ08m-28067-area21C	19CJ08-28067	21C	SLV	SLVt	50.95	24.57	0.146	0.088	5.76	14.47	2.88	0.024	0.659	99.548	1.89948	0.981336	0.0105524	0.00277851	0.179588	0.804237	0.126536	0.00070737	0.0184809	4.02369	0.81746	1.86913	1.70209	2.06839	1087.77	1079.14	1095.4
1086	Line 20 19CJ08m-28067-area21C	19CJ08-28067	21C	SLV	SLVt	51.29	24.65	0.122	0.083	5.6	14.43	2.79	0	0.65	99.617	1.90808	0.982433	0.00879898	0.00261505	0.174227	0.800304	0.12232	0	0.0181896	4.01697	0.82122	2.0337	1.80679	2.24723	1091.93	1085.13	1098.22
1087	Line 3 19CJ08m-28067-area27	19CJ08-28067	27	SLV	SLVt	48.27	24.25	0.148	0.142	7.26	13.05	4.57	0.034	1.059	98.842	1.83278	0.986431	0.0108944	0.00456625	0.230533	0.7387	0.204493	0.0010206	0.0302465	4.03966	0.762149	2.4205	2.28711	2.57623	1058.25	1054.13	1062.47
1088	Line 4 19CJ08m-28067-area27	19CJ08-28067	27	SLV	SLVt	48.49	24.38	0.127	0.113	7.09	12.84	4.55	0	1.053	98.681	1.8412	0.991754	0.0093489	0.00363384	0.225143	0.726839	0.203606	0	0.0300762	4.0316	0.763501	2.55597	2.3826	2.70939	1061.03	1056.82	1065.39
1089	Line 5 19CJ08m-28067-area27	19CJ08-28067	27	SLV	SLVt	42.87	23.72	0.145	0.138	10.77	10.47	8.05	0.02	1.609	98.25	1.68448	0.998502	0.0110456	0.0045923	0.353909	0.613316	0.372768	0.00062128	0.047557	4.08679	0.634098	2.73593	2.46971	3.04814	1036.6	1021.99	1049.46
1090	Line 6 19CJ08m-28067-area27	19CJ08-28067	27	SLV	SLVt	48.61	24.08	0.162	0.091	7.02	13.3	4.36	0.036	1.015	98.741	1.8433	0.978245	0.0119095	0.00292247	0.222623	0.751875	0.194843	0.00107924	0.0289522	4.03575	0.771551	2.6154	2.43176	2.80972	1058.19	1053.57	1063.12
1091	Line 7 19CJ08m-28067-area27	19CJ08-28067	27	SLV	SLVt	50.74	24.42	0.129	0.122	5.72	14.48	3.16	0.054	0.695	99.542	1.89168	0.975358	0.00932383	0.00385208	0.178343	0.804804	0.13884	0.0015916	0.0194907	4.02328	0.8186	1.8859	1.6745	2.11817	1087.69	1078.61	1096.43
1092	Line 8 19CJ08m-28067-area27	19CJ08-28067	27	SLV	SLVt	51.44	24.49	0.082	0.089	5.2	14.73	2.66	0.074	0.565	99.334	1.9144	0.976433	0.00591635	0.00280518	0.161845	0.817259	0.116666	0.00217725	0.0158171	4.01332	0.834701	1.81475	1.69621	1.91951	1087.19	1082.14	1091.59
1093	Line 9 19CJ08m-28067-area27	19CJ08-28067	27	SLV	SLVt	51.75	24.58	0.12	0.107	5.04	14.87	2.54	0.045	0.535	99.587	1.91937	0.976679	0.00862855	0.00336102	0.15633	0.822212	0.111023	0.00131949	0.0149262	4.01385	0.840242	1.94037	1.834	2.04222	1088.24	1083.86	1092.59
1094	Line 10 19CJ08m-28067-area27	19CJ08-28067	27	SLV	SLVt	51.54	24.48	0.101	0.098	5.16	14.67	2.74	0.067	0.611	99.499	1.91462	0.974253	0.00727392	0.00308321	0.160307	0.812444	0.119955	0.0019677	0.0170736	4.01098	0.835203	1.84725	1.6496	1.96324	1090.52	1085.52	1094.41
1095	Line 11 19CJ08m-28067-area27	19CJ08-28067	27	SLV	SLVt	51.73	24.47	0.117	0.077	5.1	14.69	2.71	0.056	0.584	99.539	1.91883	0.972411	0.00841372	0.00241893	0.158208	0.812345	0.118466	0.0016422	0.0162949	4.00903	0.836992	1.85702	1.72823	1.96107	1089.62	1085.29	1093.49
1096	Line 12 19CJ08m-28067-area27	19CJ08-28067	27	SLV	SLVt	51.56	24.52	0.123	0.089	5.08	14.79	2.72	0.056	0.573	99.519	1.91414	0.975224	0.00885269	0.00279828	0.157721	0.818568	0.119004	0.0016436	0.0160016	4.01396	0.838449	1.91977	1.79659	2.02059	1088.99	1083.89	1092.54
1097	Line 13 19CJ08m-28067-area27	19CJ08-28067	27	SLV	SLVt	51.39	24.57	0.117	0.097	5.28	14.4	2.83	0.019	0.613	99.326	1.91362	0.980177	0.0084464	0.00305906	0.164428	0.799401	0.124192	0.00055934	0.0171705	4.01106	0.829402	2.12118	1.92065	2.24324	1101.7	1095.54	1106.52
1098	Line 14 19CJ08m-28067-area27	19CJ08-28067	27	SLV	SLVt	51.2	24.5	0.1	0.118	5.58	14.18	3.03	0	0.625	99.334	1.9087	0.978488	0.0072273	0.00372553	0.173966	0.788077	0.133119	0	0.0175264	4.01083	0.81917	2.19006	2.0165	2.32148	1092.29	1084.9	1099.66
1099	Line 15 19CJ08m-28067-area27	19CJ08-28067	27	SLV	SLVt	50.91	24.61	0.152	0.071	5.83	14.14	3.28	0	0.675	99.685	1.89536	0.98157	0.0109708	0.00223864	0.181518	0.784805	0.14391	0	0.0189033	4.01927	0.812156	2.22283	2.06626	2.4682	1084.39	1076.23	1091.92
1100	Line 16 19CJ08m-28067-area27	19CJ08-28067	27	SLV	SLVt	50.83	24.55	0.12	0.1	5.89	14.15	3.22	0.043	0.708	99.61	1.89439	0.980217	0.00867039	0.00315637	0.183581	0.786195	0.141428	0.00126696	0.0198485	4.01875	0.810697	2.07922	1.85626	2.25114	1093.78	1083.94	1103.21
1101	Line 17 19CJ08m-28067-area27	19CJ08-28067	27	SLV	SLVt	50.61	24.53	0.156	0.117	5.9	14.14	3.33	0	0.689	99.493	1.88976	0.98127	0.0112928	0.00369993	0.18424	0.787125	0.146536	0	0.0193524	4.02327	0.810328	2.24683	2.05566	2.52601	1078.25	1069.37	1087.61
1102	Line 18 19CJ08m-28067-area27	19CJ08-28067	27	SLV	SLVt	50.87	24.41	0.117	0.119	5.79	14.1	3.14	0.02	0.707	99.284	1.90043	0.976965	0.0084739	0.00376509	0.180897	0.785296	0.138245	0.000590696	0.019868	4.01453	0.812773	1.94088	1.77391	2.13532	1097.47	1087.3	1108.03
1103	Line 19 19CJ08m-28067-area27	19CJ08-28067	27	SLV	SLVt	51.04	24.5	0.122	0.112	5.67	14.12	3.17	0.041	0.683	99.458	1.90196	0.97809	0.00881372	0.00353466	0.1767	0.784423	0.139213	0.00120787	0.0191451	4.01309	0.816152	2.04999	1.85697	2.22007	1094.48	1085.76	1103.76
1104	Line 20 19CJ08m-28067-area27	19CJ08-28067	27	SLV	SLVt	51.45	24.56	0.174	0.091	5.43	14.26	2.86	0	0.606	99.463	1.91471	0.979194	0.0125538	0.00286813	0.168998	0.791157	0.125434	0	0.0169643	4.01188	0.823989	2.17902	1.97372	2.31439	1081.6	1075.2	1087.25
1105	Line 21 19CJ08m-28067-area27	19CJ08-28067	27	SLV	SLVt	51.28	24.43	0.114	0.107	5.57	14.25	2.96	0	0.622	99.333	1.911	0.975347	0.0082362	0.00337704	0.173593	0.791687	0.129998	0	0.0174361	4.01068	0.820163	2.21682	2.01573	2.3386	1092.94	1085.84	1099.69
1106	Line 22 19CJ08m-28067-area27	19CJ08-28067	27	SLV	SLVt	50.9	24.62	0.131	0.117	5.89	13.92	3.27	0	0.654	99.521	1.89873	0.983908	0.0094738	0.00369632	0.183748	0.774121	0.143755	0	0.0183514	4.01578	0.80817	2.25107	2.09697	2.45876	1080.6	1070.63	1090.94
1107	Line 23 19CJ08m-28067-area27	19CJ08-28067	27	SLV	SLVt	50.57	24.6	0.111	0.115	5.85	14.02	3.23	0	0.656	99.181	1.89413	0.987126	0.00806022	0.00364798	0.183246	0.782868	0.142577	0	0.0184827	4.02013	0.810327	2.18933	2.05248	2.33647	1088.52	1077.8	1099.13
1108	Line 24 19CJ08m-28067-area27	19CJ08-28067	27	SLV	SLVt	51.25	24.64	0.126	0.104	5.7	14.2	2.81	0	0.602	99.431	1.91092	0.984263	0.00910809	0.00328413	0.177741	0.789336	0.123477	0	0.0168846	4.01501	0.816208	2.31121	2.10319	2.44062	1085.75	1077.5	1092.91
1109	Line 25 19CJ08m-28067-area27	19CJ08-28067	27	SLV	SLVt	51.34	24.71	0.127	0.106	5.69	14.3	2.86	0	0.611	99.76	1.90834	0.984	0.00915192	0.00333691	0.176879	0.792431	0.125284	0	0.0170839	4.01651	0.817521	2.28115	2.06406	2.40839	1086.46	1078.85	1093.4
1110	Line 26 19CJ08m-28067-area27	19CJ08-28067	27	SLV	SLVt	51.18	24.54	0.128	0.098	5.73	14.06	3.05	0	0.636	99.423	1.90782	0.980015	0.00925028	0.00309386	0.17863	0.781352	0.133988	0	0.0178336	4.01198	0.813923	2.11095	1.92886	2.24135	1089.15	1080.59	1096.88
1111	Line 27 19CJ08m-28067-area27	19CJ08-28067	27	SLV	SLVt	50.71	24.61	0.149	0.124	5.91	14.05	3.25	0	0.662	99.466	1.89376	0.984611	0.0107876	0.00392186	0.184579	0.782227	0.143036	0	0.0185967	4.02152	0.809084	2.156	1.99251	2.35471	1074.83	1066.07	1084.5
1112	Line 28 19CJ08m-28067-area27	19CJ08-28067	27	SLV	SLVt	50.04	24.49	0.183	0.083	6.21	13.5	4.15	0.055	0.73	99.454	1.87201	0.981526	0.0132724	0.00262971	0.194288	0.752922	0.182966	0.00162667	0.0205428	4.02179	0.794884	2.97957	2.80919	3.14274	1062	1055.67	1069.19
1113	Line 29 19CJ08m-28067-area27	19CJ08-28067	27	SLV	SLVt	49.21	24.49	0.164	0.108	6.34	13.39	4.45	0	0.767	98.924	1.85474	0.988874	0.0119835	0.00344741	0.19984	0.752378	0.197661	0	0.0217456	4.03067	0.790132	2.91996	2.78356	3.04237	1065.89	1058.89	1073.84
1114	Line 30 19CJ08m-28067-area27	19CJ08-28067	27	SLV	SLVt	49.74	24.6	0.201	0.122	6.5	13.53	4.59	0	0.767	100.059	1.85358	0.982115	0.0145214	0.00385038	0.202573	0.751671	0.20158	0	0.0215004	4.03139	0.787713	2.51954	2.426	2.63182	1057.58	1052.68	1062.75
1115	Line 31 19CJ08m-28067-area27	19CJ08-28067	27	SLV	SLVt	49.31	24.54	0.15	0.07	6.52	13.38	4.72	0.037	0.83	99.557	1.84738	0.984957	0.0108948	0.00222105	0.204283	0.747312	0.208398	0.00109589	0.0233908	4.02993	0.785326	2.75348	2.61325	2.8947	1069.69	1063.03	1075.52
1116	Line 32 19CJ08m-28067-area27	19CJ08-28067	27	SLV	SLVt	49.13	24.61	0.227	0.096	6.69	13.26	4.87	0.038	0.912	99.865	1.83874	0.986752	0.0164706	0.00304288	0.209394	0.739849	0.2148	0.00112435	0.0256753	4.03585	0.779409	2.18813	2.10905	2.29428	1058.74	1054.24	1064.11
1117	Line 1 19CJ08m-28067-area29	19CJ08-28067	29	SLV	SLVt	48.8	24.42	0.16	0.119	7.11	13.42	4.59	0	0.983	99.673	1.83501	0.983752	0.011664	0.00378969	0.223589	0.752307	0.203405	0	0.0278047	4.04132	0.770888	2.57136	2.40791	2.71332	1058.14	1054.08	1062.49
1118	Line 2 19CJ08m-28067-area29	19CJ08-28067	29	SLV	SLVt	49.89	24.53	0.147	0.101	6.61	13.63	4.11	0.051	0.875	99.95	1.86182	0.980719	0.0106353	0.00319216	0.206296	0.758308	0.180758	0.00150467	0.0245629	4.0278	0.786134	3.25326	3.13556	3.35572	1064.71	1058.22	1072.7
1119	Line 3 19CJ08m-28067-area29	19CJ08-28067	29	SLV	SLVt	50.03	24.52	0.116	0.119	6.32	14.32	3.65	0.039	0.787	99.901	1.86611	0.979827	0.00838828	0.00375918	0.197146	0.796296	0.160446	0.00115005	0.0220815	4.0352	0.801553	2.9789	2.8371	3.11992	1083.71	1074.48	1093.36
1120	Line 4 19CJ08m-28067-area29	19CJ08-28067	29	SLV	SLVt	48.74	24.26	0.165	0.108	7.47	13.22	4.63	0	0.899	99.493	1.83676	0.979446	0.0120548	0.00344691	0.235425	0.742718	0.205626	0	0.0254844	4.04097	0.759315	2.53654	2.38779	2.65896	1053.59	1049.37	1057.64
1121	Line 5 19CJ08m-28067-area29	19CJ08-28067	29	SLV	SLVt	48.79	24.35	0.141	0.097	7.65	12.94	4.9	0	0.959	99.854	1.8333	0.98022	0.0102714	0.00308683	0.240396	0.724873	0.216985	0	0.0271061	4.03624	0.750954	2.49153	2.41516	2.58937	1056.51	1052.07	1060.48
1122	Line 6 19CJ08m-28067-area29	19CJ08-28067	29	SLV	SLVt	49.29	24.35	0.166	0.109	7.31	13.22	4.5	0	0.889	99.871	1.84798	0.978045	0.0120658	0.00346101	0.229202	0.738915	0.198829	0	0.0250718	4.03357	0.763249	2.62184	2.46849	2.76958	1053.79	1049.33	1058.22
1123	Line 7 19CJ08m-28067-area29	19CJ08-28067	29	SLV	SLVt	49.42	24.47	0.136	0.078	7.15	13.22	4.58	0.025	0.935	100.014	1.84778	0.980172	0.00985811	0.0024699	0.223571	0.73689	0.20181	0.000738978	0.0262969	4.02958	0.767225	2.71097	2.5741	2.84699	1063.67	1058.81	1068.84
1124	Line 8 19CJ08m-28067-area29	19CJ08-28067	29	SLV	SLVt	48.68	24.41	0.184	0.116	7.49	13	4.96	0.062	1.026	99.959	1.82759	0.981786	0.0133922	0.00368828	0.235165	0.727605	0.219452	0.00184019	0.0289748	4.03949	0.755741	2.10924	1.98794	2.25241	1056.82	1053.44	1060.44
1125	Line 9 19CJ08m-28067-area29	19CJ08-28067	29	SLV	SLVt	48.67	24.44	0.175	0.116	7.27	12.87	5	0.058	1.014	99.64	1.83095	0.985005	0.0127633	0.00369583	0.228725	0.721803	0.221674	0.001725	0.0286946	4.03504	0.759371	2.28342	2.15257	2.41114	1058.11	1054.58	1062.01
1126	Line 10 19CJ08m-28067-area29	19CJ08-28067	29	SLV	SLVt	49.01	24.47	0.144	0.098	7.05	13.2	4.77	0.043	0.964	99.752	1.83826	0.983284	0.0104711	0.00311306	0.221144	0.738112	0.210849	0.00127508	0.0271986	4.03371	0.769463	2.5838	2.47771	2.70724	1066.16	1062.27	1070.19
1127	Line 11 19CJ08m-28067-area29	19CJ08-28067	29	SLV	SLVt	48.78	24.41	0.175	0.086	7.43	12.99	4.89	0.049	0.963	99.791	1.83287	0.982605	0.0127478	0.00273669	0.233476	0.727651	0.216535	0.00145556	0.0272183	4.03729	0.757081	2.26099	2.10955	2.41632	1057.96	1055.18	1061.33
1128	Line 13 19CJ08m-28067-area29	19CJ08-28067	29	SLV	SLVt	48.94	24.46	0.19	0.058	7.4	13.17	4.94	0.029	0.97	100.19	1.83105	0.980425	0.0137815	0.00183782	0.231543	0.734593	0.217818	0.000857786	0.0272995	4.0392	0.760341	2.11234	1.9763	2.27029	1051.85	1047.46	1055.5
1129	Line 14 19CJ08m-28067-area29	19CJ08-28067	29	SLV	SLVt	50.48	24.45	0.138	0.097	5.99	14.35	3.56	0	0.698	99.811	1.87989	0.97547	0.00996324	0.00305931	0.186553	0.796691	0.15624	0	0.0195531	4.02742	0.810267	2.84388	2.65002	2.98331	1086.65	1075.67	1098.8
1130	Line 15 19CJ08m-28067-area29	19CJ08-28067	29	SLV	SLVt	51.32	24.47	0.118	0.092	5.39	14.34	3.21	0.046	0.557	99.552	1.90662	0.973941	0.00849899	0.0028947	0.167467	0.794238	0.140544	0.00135107	0.015566	4.01112	0.825865	2.24042	2.10433	2.40399	1093.26	1087.16	1098.14
1131	Line 16 19CJ08m-28067-area29	19CJ08-28067	29	SLV	SLVt	50.87	24.69	0.164	0.106	5.51	14.64	3.14	0.085	0.602	99.821	1.89072	0.983124	0.0118173	0.00333664	0.17127	0.811206	0.137539	0.00249764	0.0168309	4.02834	0.825675	1.81417	1.66245	1.98977	1073.18	1067.39	1078.74
1132	Line 17 19CJ08m-28067-area29	19CJ08-28067	29	SLV	SLVt	50.89	24.61	0.124	0.131	5.92	14.39	3.2	0.024	0.73	100.019	1.8899	0.979131	0.00892765	0.00412019	0.183862	0.796696	0.140051	0.000704634	0.0203928	4.02379	0.812492	2.00155	1.75495	2.15584	1091.68	1079.95	1102.73
1133	Line 18 19CJ08m-28067-area29	19CJ08-28067	29	SLV	SLVt	51.1	24.59	0.069	0.09	5.81	14.39	3.16	0.026	0.716	99.986	1.89619	0.977554	0.00496384	0.0028284	0.180302	0.79606	0.13819	0.000762743	0.0199857	4.01683	0.815333	1.95978	1.77342	2.13531	1107.67	1096.19	1116.73
1134	Line 19 19CJ08m-28067-area29	19CJ08-28067	29	SLV	SLVt	51.19	24.56	0.107	0.065	5.81	14.47	3.01	0	0.698	99.93	1.9	0.976604	0.00769946	0.00204324	0.180347	0.800685	0.131663	0	0.0194881	4.01853	0.816166	1.88866	1.7291	2.09845	1093.43	1083.96	1101.73
1135	Line 20 19CJ08m-28067-area29	19CJ08-28067	29	SLV	SLVt	51.32	24.57	0.125	0.099	5.63	14.74	2.91	0	0.688	100.089	1.90039	0.974728	0.00897377	0.00310478	0.174353	0.813727	0.126993	0	0.0191642	4.02143	0.823544	1.86375	1.69157	2.10461	1095.05	1085.57	1102.64
1136	Line 21 19CJ08m-28067-area29	19CJ08-28067	29	SLV	SLVt	51.84	24.78	0.111	0.044	5.26	14.8	2.63	0.026	0.616	100.122	1.91477	0.980563	0.00794847	0.0013764	0.162481	0.814965	0.114482	0.000759225	0.0171151	4.01446	0.83377	1.89327	1.71864	2.0305	1097.04	1092.17	1100.77
1137	Line 22 19CJ08m-28067-area29	19CJ08-28067	29	SLV	SLVt	51.81	24.76	0.096	0.132	5.42	14.74	2.82	0.029	0.631	100.439	1.90914	0.977456	0.00685811	0.00411943	0.167027	0.809743	0.122463	0.000844826	0.0174904	4.01514	0.829	1.9424	1.75101	2.10511	1094.77	1087.42	1100.89
1138	Line 23 19CJ08m-28067-area29	19CJ08-28067	29	SLV	SLVt	50.55	24.7	0.17	0.097	6.18	14.07	3.51	0	0.751	100.061	1.88049	0.984395	0.0122605	0.00305605	0.192266	0.780314	0.153882	0	0.0210154	4.02768	0.802313	2.58089	2.3565	2.76024	1072.5	1063.56	1082.65
1139	Line 24 19CJ08m-28067-area29	19CJ08-28067	29	SLV	SLVt	50.51	24.43	0.178	0.103	6.06	14.29	3.24	0	0.728	99.567	1.8865	0.977517	0.0128886	0.00325803	0.189285	0.795676	0.142611	0	0.020453	4.02819	0.807825	1.88262	1.67038	2.09559	1072.17	1063.87	1081.25
1140	Line 25 19CJ08m-28067-area29	19CJ08-28067	29	SLV	SLVt	47.8	24.53	0.153	0.1	7.33	12.57	6.04	0.068	1.414	100.016	1.79399	0.986304	0.0111325	0.00317856	0.230069	0.703317	0.267152	0.00201765	0.0399197	4.03708	0.753511	2.0044	1.83566	2.1829	1066.94	1060.45	1073.08
1141	Line 26 19CJ08m-28067-area29	19CJ08-28067	29	SLV	SLVt	47.73	24.63	0.185	0.106	7.56	12.4	6.06	0.026	1.208	99.906	1.79565	0.992698	0.0134931	0.00337734	0.237857	0.695468	0.268679	0.000773302	0.0341857	4.04218	0.745151	2.28786	2.14729	2.46128	1062.28	1056.49	1067.55
1142	Line 27 19CJ08m-28067-area29	19CJ08-28067	29	SLV	SLVt	47.65	24.57	0.194	0.098	7.64	12.5	6.15	0	1.257	100.061	1.79045	0.989066	0.0141322	0.00311862	0.24008	0.700218	0.272335	0	0.0355287	4.04492	0.744677	2.13108	1.98277	2.30171	1056.75	1051.65	1062.05
1143	Line 28 19CJ08m-28067-area29	19CJ08-28067	29	SLV	SLVt	47.74	24.6	0.14	0.107	7.78	12.44	5.71	0	1.192	99.727	1.80151	0.994512	0.0102421	0.0034196	0.245525	0.699839	0.253933	0	0.0338357	4.04281	0.740285	2.39039	2.27383	2.48061	1056.27	1052.98	1059.87
1144	Line 29 19CJ08m-28067-area29	19CJ08-28067	29	SLV	SLVt	47.4	24.56	0.197	0.092	8.21	12.23	5.84	0	1.176	99.744	1.7935	0.995575	0.014451	0.00294816	0.259795	0.689883	0.260415	0	0.0334717	4.05004	0.726439	2.20395	2.07276	2.34335	1052.05	1048.24	1055.98
1145	Line 30 19CJ08m-28067-area29	19CJ08-28067	29	SLV	SLVt	47.52	24.6	0.198	0.098	8.36	12.11	5.81	0.019	1.044	99.858	1.79797	0.997157	0.0145238	0.0031403	0.264531	0.683086	0.259067	0.000568336	0.0297135	4.04976	0.720846	2.30792	2.186	2.44699	1052.68	1048.31	1057.2
1146	Line 31 19CJ08m-28067-area29	19CJ08-28067	29	SLV	SLVt	45.25	25.89	0.228	0.098	7.99	11.75	5.48	0	0.973	99.806	1.76424	1.08141	0.0172338	0.00323596	0.260524	0.682969	0.251796	0	0.0285363	4.08995	0.723872	2.23444	2.15108	2.31012	1043.57	1035.49	1049.75
1147	Line 32 19CJ08m-28067-area29	19CJ08-28067	29	SLV	SLVt	48.11	24.48	0.212	0.09	8.07	12.31	5.53	0	0.974	99.79	1.81468	0.989229	0.0155027	0.00287505	0.254566	0.692224	0.245821	0	0.0276356	4.04253	0.731127	2.15315	2.08524	2.24787	1047.03	1042.35	1051.03
1148	Line 33 19CJ08m-28067-area29	19CJ08-28067	29	SLV	SLVt	47.6	24.45	0.199	0.123	8.03	12.48	5.46	0.026	0.94	99.343	1.80635	0.994022	0.0146405	0.00395311	0.254844	0.706048	0.244184	0.000780033	0.026833	4.05165	0.734784	2.16038	2.06691	2.30596	1049.18	1045.79	1053.22
1149	Line 34 19CJ08m-28067-area29	19CJ08-28067	29	SLV	SLVt	47.71	24.48	0.208	0.11	8.1	12.4	5.43	0	0.928	99.393	1.80953	0.994693	0.0152942	0.00353335	0.256924	0.701136	0.242709	0	0.0264758	4.05029	0.731829	2.18063	2.10682	2.27582	1046.61	1040.11	1050.6
1150	Line 35 19CJ08m-28067-area29	19CJ08-28067	29	SLV	SLVt	47.72	24.38	0.196	0.104	8.05	12.31	5.39	0	0.92	99.101	1.81406	0.992905	0.014445	0.0033483	0.255924	0.697646	0.241474	0	0.0263079	4.04611	0.731615	2.22718	2.14034	2.36411	1045.98	1039.2	1050.67
1151	Line 36 19CJ08m-28067-area29	19CJ08-28067	29	SLV	SLVt	47.66	24.65	0.23	0.086	7.96	12.33	5.52	0	0.917	99.598	1.80758	1.00157	0.0169114	0.00276237	0.252476	0.697159	0.246725	0	0.0261613	4.05135	0.734133	2.13226	2.05913	2.22144	1045.75	1039.9	1049.8
1152	Line 1 19CJ08m-28067-area15	19CJ08-28067	15	SLV	SLVt	47.31	23.86	0.134	0.12	8.11	12.34	5.16	0.026	1.262	98.392	1.81214	0.979109	0.00995066	0.00389277	0.25979	0.704659	0.232926	0.00078733	0.0363617	4.03962	0.730633	2.23216	2.12411	2.33252	1060.19	1056.36	1064.08
1153	Line 2 19CJ08m-28067-area15	19CJ08-28067	15	SLV	SLVt	49.62	24.14	0.131	0.075	6.53	13.67	3.67	0.037	0.879	98.752	1.87261	0.975999	0.00958451	0.00239712	0.206095	0.769101	0.163225	0.00110392	0.0249531	4.02507	0.788663	2.9266	2.80396	3.11724	1067.57	1060.7	1076.55
1154	Line 3 19CJ08m-28067-area15	19CJ08-28067	15	SLV	SLVt	49.4	24.29	0.152	0.104	6.47	13.45	3.72	0.019	0.859	98.464	1.87108	0.985632	0.0111614	0.00333609	0.204943	0.759473	0.16605	0.000568937	0.024474	4.02672	0.787495	2.95182	2.78524	3.15286	1067.49	1060.74	1075.34
1155	Line 4 19CJ08m-28067-area15	19CJ08-28067	15	SLV	SLVt	48.83	24.15	0.147	0.11	6.97	13.15	4.08	0.041	0.935	98.443	1.85584	0.983316	0.0108313	0.00354067	0.221539	0.745083	0.182744	0.00123192	0.0267308	4.03086	0.770811	3.04907	2.89595	3.19182	1057.02	1052.99	1061.36
1156	Line 5 19CJ08m-28067-area15	19CJ08-28067	15	SLV	SLVt	48.65	24.11	0.167	0.114	7.46	13.11	4.24	0.027	1.054	98.959	1.84415	0.979111	0.0122726	0.00365979	0.236491	0.740867	0.189413	0.000809136	0.0300538	4.03682	0.75803	2.44523	2.28663	2.62786	1054.4	1049.35	1059.11
1157	Line 6 19CJ08m-28067-area15	19CJ08-28067	15	SLV	SLVt	49.03	24.21	0.167	0.096	7.31	13.18	4.04	0	1.034	99.08	1.85369	0.9806	0.0122405	0.00307387	0.23113	0.742875	0.180006	0	0.0294064	4.03302	0.762701	2.61594	2.41889	2.81078	1052.23	1048.65	1056.53
1158	Line 7 19CJ08m-28067-area15	19CJ08-28067	15	SLV	SLVt	48.3	24.17	0.206	0.113	7.72	12.76	4.47	0	1.152	98.922	1.8353	0.983917	0.0151752	0.00363644	0.245324	0.722828	0.200169	0	0.0329275	4.03928	0.746606	1.82022	1.67598	1.94454	1049.05	1045.14	1053.14
1159	Line 8 19CJ08m-28067-area15	19CJ08-28067	15	SLV	SLVt	48.07	24.32	0.117	0.13	7.57	13.02	4.33	0	1.137	98.699	1.83095	0.992405	0.00863968	0.00419359	0.241137	0.739332	0.194367	0	0.0325769	4.0436	0.75406	2.36109	2.17833	2.53347	1055.98	1050.76	1060.62
1160	Line 9 19CJ08m-28067-area15	19CJ08-28067	15	SLV	SLVt	48.35	24.13	0.155	0.114	7.51	12.88	4.43	0.028	1.136	98.761	1.83778	0.982598	0.0114219	0.00366978	0.238726	0.729856	0.198441	0.000841394	0.0324804	4.03581	0.75353	2.29948	2.16931	2.44841	1060.09	1055.85	1064.03
1161	Line 10 19CJ08m-28067-area15	19CJ08-28067	15	SLV	SLVt	48.43	24.2	0.118	0.094	7.46	13.11	4.23	0.042	1.085	98.799	1.84001	0.985014	0.00869152	0.00302463	0.237032	0.742562	0.189398	0.00126154	0.0310085	4.038	0.75803	2.63141	2.47074	2.78273	1063.07	1058.94	1066.86
1162	Line 11 19CJ08m-28067-area15	19CJ08-28067	15	SLV	SLVt	48.05	24.16	0.197	0.126	7.79	12.81	4.36	0	1.134	98.688	1.83273	0.987241	0.0145673	0.00407018	0.248488	0.728414	0.195984	0	0.032536	4.04403	0.745637	1.90705	1.74391	2.05834	1047.19	1042.48	1051.44
1163	Line 12 19CJ08m-28067-area15	19CJ08-28067	15	SLV	SLVt	47.62	24.14	0.186	0.15	8.13	12.72	4.79	0	1.142	98.916	1.81574	0.986107	0.0137495	0.0048439	0.25925	0.723064	0.215244	0	0.032755	4.05076	0.736082	1.92374	1.78825	2.07208	1046.42	1041.74	1050.54
1164	Line 13 19CJ08m-28067-area15	19CJ08-28067	15	SLV	SLVt	48.09	24.13	0.184	0.098	7.71	12.81	4.5	0	1.101	98.625	1.83259	0.985123	0.0135937	0.00316283	0.245714	0.727755	0.202094	0	0.0315606	4.0416	0.74759	2.00365	1.8613	2.16986	1051.65	1047.43	1055.1
1165	Line 14 19CJ08m-28067-area15	19CJ08-28067	15	SLV	SLVt	48.09	24.11	0.185	0.083	7.7	12.83	4.6	0	1.075	98.704	1.83113	0.98352	0.0136566	0.00267658	0.245199	0.728309	0.20642	0	0.0307906	4.0417	0.748129	2.0335	1.88483	2.20387	1050.64	1046.77	1053.94
1166	Line 15 19CJ08m-28067-area15	19CJ08-28067	15	SLV	SLVt	48.22	24.13	0.164	0.102	7.64	12.8	4.48	0	1.041	98.614	1.83702	0.984842	0.0121127	0.00329099	0.243413	0.72698	0.201139	0	0.0298321	4.03863	0.74916	2.28811	2.13002	2.46116	1052.7	1048.29	1056.26
1167	Line 16 19CJ08m-28067-area15	19CJ08-28067	15	SLV	SLVt	48.85	24.27	0.151	0.119	7.12	13.06	4.33	0.033	0.983	98.924	1.84868	0.983988	0.0110786	0.00381403	0.225342	0.736828	0.193115	0.000987318	0.0279832	4.03182	0.765798	2.70611	2.53084	2.88164	1057.82	1053.25	1062.32
1168	Line 17 19CJ08m-28067-area15	19CJ08-28067	15	SLV	SLVt	48.3	24.16	0.163	0.109	7.45	12.77	4.77	0.035	1.13	98.914	1.83214	0.981818	0.0119869	0.00350169	0.236337	0.722151	0.213236	0.0010496	0.0322431	4.03447	0.753427	2.22521	2.09853	2.34065	1061.93	1057.69	1065.51
1169	Line 18 19CJ08m-28067-area15	19CJ08-28067	15	SLV	SLVt	48.31	24.03	0.239	0.097	7.47	12.74	4.76	0.031	1.166	98.858	1.83312	0.976856	0.0175817	0.00311721	0.23705	0.720691	0.212859	0.000929954	0.0332813	4.03549	0.752491	1.87395	1.76963	1.97201	1055.8	1051.89	1059.8
1170	Line 19 19CJ08m-28067-area15	19CJ08-28067	15	SLV	SLVt	48.43	24.1	0.112	0.133	7.39	12.96	4.51	0	1.126	98.778	1.83832	0.980045	0.00824202	0.00427561	0.234593	0.733394	0.20175	0	0.0321508	4.03277	0.757648	2.34199	2.20147	2.48726	1057.95	1053.39	1062.57
1171	Line 5 19CJ08m-28067-area16	19CJ08-28067	16	SLV	SLVt	47.24	24.44	0.172	0.067	6.51	13.6	5.11	0.053	0.869	98.067	1.80524	1.00057	0.0127427	0.0021684	0.208051	0.774799	0.230131	0.0016012	0.0249799	4.06029	0.788319	2.45965	2.34432	2.58448	1064.39	1058.59	1069.8
1172	Line 9 19CJ08m-28067-area16	19CJ08-28067	16	SLV	SLVt	48.14	24.46	0.187	0.093	6.23	13.68	4.78	0.05	0.86	98.48	1.82634	0.994156	0.0137539	0.00298812	0.197664	0.773726	0.213714	0.00149965	0.0245426	4.04839	0.796514	2.46707	2.32031	2.6256	1069.55	1063.79	1076.47
1173	Line 19 19CJ08m-28067-area16	19CJ08-28067	16	SLV	SLVt	48.4	24.21	0.191	0.068	6.61	12.87	5.68	0.072	1.147	99.248	1.82016	0.975397	0.0139254	0.00216577	0.207888	0.721553	0.251735	0.00214063	0.032447	4.02742	0.77633	2.36535	2.20461	2.52068	1054.36	1048.64	1061.93
1174	Line 20 19CJ08m-28067-area16	19CJ08-28067	16	SLV	SLVt	48.85	24.37	0.154	0.081	6.38	13.02	5.78	0.109	1.114	99.896	1.82282	0.974218	0.0111406	0.00255978	0.199096	0.724293	0.254177	0.00321551	0.0312687	4.02279	0.784385	2.54726	2.39284	2.68078	1064.66	1060.04	1070.96
1175	Line 21 19CJ08m-28067-area16	19CJ08-28067	16	SLV	SLVt	48.43	24.44	0.205	0.087	6.46	13.08	5.47	0.136	1.182	99.49	1.81809	0.982933	0.0149198	0.00276604	0.202813	0.732037	0.242001	0.00403631	0.0333783	4.03297	0.783053	2.2775	2.06317	2.462	1062.39	1057.74	1067.53
1176	Line 22 19CJ08m-28067-area16	19CJ08-28067	16	SLV	SLVt	48.11	24.49	0.139	0.078	6.66	12.86	5.63	0.121	1.267	99.361	1.8109	0.987575	0.0101434	0.00248652	0.209651	0.721647	0.249746	0.00360072	0.0358742	4.03162	0.774883	2.31365	2.1719	2.52702	1066.59	1061.76	1071.74
1177	Line 23 19CJ08m-28067-area16	19CJ08-28067	16	SLV	SLVt	47.7	24.33	0.153	0.084	7.25	12.43	6.15	0.046	1.291	99.435	1.79833	0.982688	0.0111828	0.00268207	0.228588	0.698631	0.273248	0.00137105	0.0366121	4.03334	0.753469	2.15439	1.98924	2.3587	1066.38	1060.7	1072.1
1178	Line 24 19CJ08m-28067-area16	19CJ08-28067	16	SLV	SLVt	47.51	24.3	0.189	0.107	7.26	12.5	6.1	0	1.297	99.265	1.79545	0.983819	0.0138471	0.0034246	0.22945	0.704242	0.271673	0	0.03687	4.03877	0.754255	2.09006	1.94183	2.26115	1060.96	1055.08	1066.74
1179	Line 1 19CJ08m-28067-area25	19CJ08-28067	25	SLV	SLVt	50.84	24.46	0.141	0.088	5.82	14.29	3.89	0.024	0.79	100.347	1.87878	0.968388	0.0101018	0.00275418	0.17987	0.787278	0.169415	0.000701176	0.0219606	4.01925	0.814021	3.46295	3.29458	3.55188	1108.5	1094.89	1120.1
1180	Line 2 19CJ08m-28067-area25	19CJ08-28067	25	SLV	SLVt	47.22	24.19	0.195	0.089	7.73	12.34	6.46	0	1.244	99.469	1.78444	0.979342	0.0142863	0.00284843	0.244298	0.695211	0.287699	0	0.0353625	4.04349	0.739973	2.30237	2.11469	2.52268	1057.25	1052.52	1062.76
1181	Line 3 19CJ08m-28067-area25	19CJ08-28067	25	SLV	SLVt	50.87	24.36	0.143	0.097	5.64	14.46	3.35	0.058	0.727	99.714	1.89088	0.970067	0.010305	0.00305361	0.175326	0.801301	0.14675	0.00170442	0.0203275	4.01972	0.820478	2.33444	2.07229	2.65915	1091.32	1082.52	1098.37
1182	Line 4 19CJ08m-28067-area25	19CJ08-28067	25	SLV	SLVt	51.63	24.67	0.13	0.101	5.28	14.66	2.93	0.036	0.614	100.068	1.90847	0.976956	0.00931613	0.00316187	0.163223	0.807873	0.127639	0.00105204	0.0170726	4.01477	0.831919	2.06055	1.90316	2.1739	1093.01	1086.83	1098.75
1183	Line 5 19CJ08m-28067-area25	19CJ08-28067	25	SLV	SLVt	51.38	24.7	0.114	0.102	5.47	14.6	2.99	0	0.631	100.003	1.90303	0.980101	0.00818588	0.00319957	0.169435	0.806176	0.130513	0	0.0175804	4.01822	0.826329	2.15973	1.97326	2.29477	1096.39	1090.39	1102.42
1184	Line 6 19CJ08m-28067-area25	19CJ08-28067	25	SLV	SLVt	51.71	24.59	0.127	0.08	5.39	14.49	2.98	0.059	0.617	100.043	1.91129	0.973714	0.00910046	0.00250426	0.166611	0.798444	0.129807	0.00172404	0.0171547	4.01034	0.827356	1.86573	1.73208	1.98105	1088.62	1083.28	1094
1185	Line 7 19CJ08m-28067-area25	19CJ08-28067	25	SLV	SLVt	51.24	24.54	0.157	0.093	5.69	14.42	3.19	0.041	0.639	100.01	1.89887	0.974279	0.0112796	0.00291883	0.176345	0.796667	0.139318	0.0012012	0.0178129	4.01869	0.818764	2.04462	1.86243	2.21501	1084.13	1076.67	1091.64
1186	Line 8 19CJ08m-28067-area25	19CJ08-28067	25	SLV	SLVt	51.12	24.54	0.134	0.099	5.69	14.45	3.21	0	0.66	99.912	1.8967	0.975449	0.00963876	0.00311087	0.176557	0.799283	0.14036	0	0.0184204	4.01952	0.819072	2.18455	1.98735	2.35193	1093.25	1083.76	1102.43
1187	Line 9 19CJ08m-28067-area25	19CJ08-28067	25	SLV	SLVt	51.34	24.59	0.153	0.121	5.64	14.62	3.01	0.041	0.616	100.153	1.9005	0.975198	0.0109802	0.00379347	0.174604	0.806835	0.131313	0.00119989	0.017153	4.02158	0.822094	1.96806	1.80304	2.11749	1076.12	1068.85	1083.36
1188	Line 10 19CJ08m-28067-area25	19CJ08-28067	25	SLV	SLVt	51.2	24.7	0.13	0.108	5.88	14.08	3.49	0	0.64	100.249	1.8949	0.979342	0.00932754	0.00338515	0.181994	0.77686	0.15222	0	0.0178173	4.01584	0.810197	2.7684	2.55705	2.9197	1086.56	1076.07	1097.79
1189	Line 11 19CJ08m-28067-area25	19CJ08-28067	25	SLV	SLVt	51.25	24.54	0.124	0.132	5.75	14.45	3.03	0.021	0.614	99.928	1.90192	0.975654	0.00892133	0.0041487	0.178456	0.799452	0.132517	0.000616118	0.0171401	4.01883	0.817512	2.01662	1.8633	2.16445	1085.96	1076.72	1094.72
1190	Line 12 19CJ08m-28067-area25	19CJ08-28067	25	SLV	SLVt	51.27	24.58	0.13	0.136	5.94	14.33	3.18	0.041	0.638	100.277	1.89801	0.97485	0.00933009	0.00426395	0.183901	0.79087	0.138737	0.00119995	0.0177665	4.01892	0.811339	2.01036	1.82391	2.15973	1077.8	1068.81	1085.7
1191	Line 13 19CJ08m-28067-area25	19CJ08-28067	25	SLV	SLVt	50.37	24.62	0.121	0.109	6.73	13.56	3.55	0	0.719	99.813	1.88268	0.985857	0.00876794	0.0034504	0.210369	0.755594	0.156373	0	0.0202152	4.0233	0.782218	2.75247	2.57535	2.89853	1060.09	1053.63	1066.77
1192	Line 14 19CJ08m-28067-area25	19CJ08-28067	25	SLV	SLVt	50.17	24.64	0.116	0.125	6.76	13.53	3.67	0	0.736	99.748	1.87698	0.987592	0.00841359	0.00396062	0.211507	0.754636	0.161812	0	0.0207128	4.02561	0.781081	2.90589	2.7594	3.12292	1057.46	1050.72	1065.29
1193	Line 15 19CJ08m-28067-area25	19CJ08-28067	25	SLV	SLVt	50.29	24.66	0.136	0.113	6.71	13.63	3.64	0	0.747	99.949	1.87747	0.986294	0.00984325	0.0035728	0.209497	0.758598	0.160148	0	0.0209777	4.0264	0.783599	2.87746	2.73344	3.05325	1058.41	1052.36	1065.09
1194	Line 16 19CJ08m-28067-area25	19CJ08-28067	25	SLV	SLVt	49.89	24.54	0.104	0.142	6.63	13.71	3.8	0	0.759	99.603	1.8693	0.98506	0.00755454	0.00450602	0.207751	0.765823	0.167795	0	0.0213921	4.02918	0.78661	3.17951	2.944	3.33126	1062.01	1054.03	1069.85
1195	Line 17 19CJ08m-28067-area25	19CJ08-28067	25	SLV	SLVt	48.11	24.4	0.24	0.116	7.21	12.79	5.59	0.02	1.241	99.726	1.80909	0.982961	0.0174962	0.00369421	0.226737	0.717001	0.247723	0.000594565	0.0351029	4.0404	0.759745	2.04502	1.96397	2.12771	1056.06	1049.9	1062.24
1196	Line 18 19CJ08m-28067-area25	19CJ08-28067	25	SLV	SLVt	46.85	24.38	0.166	0.09	7.49	12.38	6.61	0	1.552	99.541	1.7702	0.986886	0.0121598	0.00288	0.236677	0.69736	0.294336	0	0.0441113	4.04461	0.746608	1.85105	1.65149	2.07046	1064.27	1058.27	1070.72
1197	Line 1 19CJ08m-28067-area17	19CJ08-28067	17	SLV	SLVt	40.07	23.6	0.201	0.089	11.28	9.17	10.22	0.021	3	98.031	1.58795	1.00196	0.0154427	0.00298708	0.373844	0.541767	0.477309	0.000657934	0.0894305	4.09135	0.5917	1.50958	1.00155	1.83975	1008.2	998.079	1021.11
1198	Line 2 19CJ08m-28067-area17	19CJ08-28067	17	SLV	SLVt	44.52	24.18	0.19	0.099	8.26	11.42	8.09	0.054	2.04	98.853	1.70597	0.992644	0.0141149	0.00321284	0.264703	0.652388	0.365337	0.00163589	0.0588019	4.0588	0.711367	1.58173	1.20917	2.00328	1081.62	1077.02	1087.35
1199	Line 4 19CJ08m-28067-area17	19CJ08-28067	17	SLV	SLVt	48.61	24.55	0.139	0.056	6.33	13.3	5.33	0.122	1.163	99.605	1.82127	0.985419	0.0100965	0.00177695	0.198342	0.742889	0.235345	0.0036137	0.0327773	4.03153	0.789274	2.32614	2.14525	2.46008	1068.18	1063.47	1073.52
1200	Line 5 19CJ08m-28067-area17	19CJ08-28067	17	SLV	SLVt	48.22	24.46	0.128	0.085	6.64	13.18	5.67	0.082	1.264	99.728	1.80752	0.982277	0.00930195	0.00269844	0.208155	0.736539	0.250477	0.00243005	0.0356409	4.03504	0.779659	2.24922	2.13217	2.41894	1062.08	1057.37	1068.54
1201	Line 6 19CJ08m-28067-area17	19CJ08-28067	17	SLV	SLVt	48.08	24.46	0.139	0.09	6.75	13.03	5.88	0.111	1.298	99.853	1.80159	0.981908	0.0100975	0.0028561	0.211524	0.727884	0.259657	0.00328822	0.0365859	4.0354	0.774832	2.20532	2.05874	2.41813	1064.43	1059.71	1070.44
1202	Line 7 19CJ08m-28067-area17	19CJ08-28067	17	SLV	SLVt	47.58	24.44	0.125	0.068	6.97	12.74	6.09	0.085	1.37	99.47	1.79241	0.986362	0.00912917	0.0021695	0.219588	0.715496	0.270371	0.00253149	0.0388222	4.03688	0.765167	2.17228	1.9765	2.33376	1061.82	1057.23	1068.41
1203	Line 8 19CJ08m-28067-area17	19CJ08-28067	17	SLV	SLVt	47.23	24.4	0.165	0.097	7.15	12.67	6.43	0.095	1.487	99.736	1.77749	0.983786	0.0120387	0.00309172	0.225039	0.710871	0.285187	0.00282656	0.0420965	4.04243	0.75955	1.67332	1.45091	1.91395	1065.91	1060.82	1072.58
1204	Line 9 19CJ08m-28067-area17	19CJ08-28067	17	SLV	SLVt	46.93	24.32	0.149	0.093	7.37	12.31	6.72	0.055	1.587	99.543	1.77111	0.983285	0.0109016	0.00297246	0.232608	0.692591	0.298877	0.00164097	0.0450523	4.03903	0.748586	1.45297	1.16938	1.78981	1071.92	1066.53	1077.52
1205	Line 10 19CJ08m-28067-area17	19CJ08-28067	17	SLV	SLVt	47.66	24.49	0.188	0.09	6.99	12.78	6.05	0.102	1.413	99.763	1.79111	0.986004	0.0136973	0.0028645	0.219689	0.716017	0.26795	0.00303049	0.0399444	4.04031	0.765216	1.88997	1.71684	2.08346	1062.59	1056.59	1069.8
1206	Line 11 19CJ08m-28067-area17	19CJ08-28067	17	SLV	SLVt	47.15	24.47	0.167	0.111	7.43	12.25	6.43	0.053	1.551	99.624	1.77913	0.989194	0.0122166	0.00354721	0.234465	0.689107	0.285935	0.00158105	0.0440234	4.0392	0.746132	1.6321	1.37207	1.8817	1071.02	1065.13	1076.59
1207	Line 12 19CJ08m-28067-area17	19CJ08-28067	17	SLV	SLVt	47.29	24.53	0.184	0.09	7.53	12.34	6.39	0.051	1.476	99.883	1.78021	0.989288	0.0134286	0.00286936	0.237062	0.692537	0.283488	0.00151781	0.0417961	4.0422	0.744985	1.73567	1.49801	1.9533	1066.68	1061.53	1073.1
1208	Line 13 19CJ08m-28067-area17	19CJ08-28067	17	SLV	SLVt	47.38	24.52	0.204	0.096	7.5	12.32	6.25	0.042	1.399	99.711	1.78624	0.990345	0.0149102	0.00306517	0.236466	0.692436	0.277686	0.00125181	0.0396742	4.04207	0.745435	1.90303	1.70686	2.09378	1067.67	1061.9	1073
1209	Line 14 19CJ08m-28067-area17	19CJ08-28067	17	SLV	SLVt	47.13	24.5	0.162	0.068	7.83	12.13	6.35	0	1.468	99.65	1.78087	0.991796	0.0118675	0.00217612	0.247434	0.683313	0.282773	0	0.041726	4.04195	0.734155	2.22012	2.03355	2.3804	1055.13	1050.59	1060.31
1210	Line 15 19CJ08m-28067-area17	19CJ08-28067	17	SLV	SLVt	49.16	24.4	0.162	0.106	6.87	13.3	4.82	0	0.939	99.802	1.84104	0.978956	0.0117618	0.00336199	0.215165	0.742554	0.21273	0	0.0264523	4.03202	0.775336	2.628	2.49193	2.74487	1062.83	1058.05	1067.55
1211	Line 1 19CJ09-28065-area20C	19CJ09-28065	20C	SLV	SLVt	47.59	23.13	0.408	0.182	9.39	11.38	8.27	0.024	1.285	101.679	1.76359	0.918287	0.0293123	0.00571204	0.291011	0.628706	0.361174	0.000703132	0.0358204	4.03431	0.683586	4.36883	4.02155	4.70041	1073.91	1064.76	1081.94
1212	Line 2 19CJ09-28065-area20C	19CJ09-28065	20C	SLV	SLVt	45.92	23.26	0.374	0.186	9.85	10.48	7.6	0	1.365	99.085	1.75906	0.954577	0.0277753	0.00603435	0.315558	0.598502	0.343102	0	0.0393331	4.04394	0.654773	3.12299	2.7867	3.48716	1032.22	1011.48	1047.47
1213	Line 3 19CJ09-28065-area20C	19CJ09-28065	20C	SLV	SLVt	46.39	23.29	0.391	0.204	9.58	10.74	7.19	0	1.289	99.074	1.77337	0.953819	0.0289774	0.00660455	0.30627	0.612074	0.323917	0	0.0370658	4.0421	0.666498	3.26701	2.95562	3.62491	1032.85	1018.68	1046.76
1214	Line 4 19CJ09-28065-area20C	19CJ09-28065	20C	SLV	SLVt	46.74	23.27	0.35	0.242	9.92	10.79	6.59	0	1.215	99.133	1.78837	0.953864	0.0259624	0.00784191	0.317427	0.61548	0.297155	0	0.0349696	4.04107	0.659745	2.53662	2.29205	2.89249	1006.17	986.43	1019.44
1215	Line 5 19CJ09-28065-area20C	19CJ09-28065	20C	SLV	SLVt	44.71	23.09	0.405	0.24	10.89	9.64	8.22	0	1.82	99.015	1.72514	0.954476	0.0302958	0.00784276	0.351407	0.554525	0.373784	0	0.0528247	4.05029	0.612104	1.90193	1.60062	2.26607	989.475	971.9	1006.02
1216	Line 6 19CJ09-28065-area20C	19CJ09-28065	20C	SLV	SLVt	44.73	23.08	0.42	0.22	10.86	9.67	8.18	0	1.84	99	1.72584	0.954026	0.0314167	0.00718893	0.350426	0.556229	0.371951	0	0.0534031	4.05049	0.613496	1.80644	1.50356	2.16305	993.734	979.02	1009.78
1217	Line 7 19CJ09-28065-area20C	19CJ09-28065	20C	SLV	SLVt	44.04	22.98	0.424	0.294	11.43	9.14	8.86	0	1.96	99.128	1.70307	0.952044	0.0317877	0.00962878	0.369654	0.526934	0.403784	0	0.0570148	4.05392	0.587711	1.83277	1.58585	2.14578	928.652	914.463	945.756
1218	Line 8 19CJ09-28065-area20C	19CJ09-28065	20C	SLV	SLVt	45.96	23.11	0.459	0.24	10.81	10.15	8.62	0	1.7	101.049	1.73113	0.932551	0.0335175	0.00765598	0.340518	0.569957	0.382638	0	0.0481666	4.04614	0.625999	2.77915	2.37399	3.22639	1013.89	994.657	1034.67
1219	Line 9 19CJ09-28065-area20C	19CJ09-28065	20C	SLV	SLVt	45.18	23.11	0.394	0.253	10.53	9.96	7.66	0	1.607	98.705	1.74521	0.956364	0.0295057	0.00827677	0.340168	0.573569	0.348707	0	0.0466943	4.0485	0.627718	2.16432	1.90166	2.5088	982.036	961.868	1006.33
1220	Line 10 19CJ09-28065-area20C	19CJ09-28065	20C	SLV	SLVt	44.68	23.14	0.408	0.257	10.98	9.65	8.32	0.019	1.82	99.275	1.72066	0.954699	0.0304614	0.0083821	0.353628	0.55403	0.377602	0.000578468	0.0527228	4.05276	0.610395	1.84431	1.52853	2.20054	998.542	978.614	1016.45
1221	Line 11 19CJ09-28065-area20C	19CJ09-28065	20C	SLV	SLVt	46.24	23.31	0.302	0.175	9.4	10.83	7.65	0	1.308	99.214	1.76274	0.951994	0.0223195	0.00564998	0.299683	0.615493	0.343686	0	0.037508	4.03907	0.672541	3.63651	3.27495	4.02083	1053.15	1039.41	1064.75
1222	Line 12 19CJ09-28065-area20C	19CJ09-28065	20C	SLV	SLVt	46.45	23.44	0.3	0.181	9.3	10.92	7.39	0	1.314	99.309	1.76892	0.956317	0.0221489	0.00583767	0.296189	0.619969	0.331663	0	0.0376412	4.03868	0.676705	3.57489	3.20148	3.90031	1051.81	1039.74	1063.69
1223	Line 13 19CJ09-28065-area20C	19CJ09-28065	20C	SLV	SLVt	46.4	23.39	0.282	0.193	9.27	10.85	7.47	0	1.354	99.214	1.76801	0.954814	0.0208317	0.0062282	0.2954	0.616341	0.335442	0	0.0388089	4.03588	0.676005	3.44095	3.05468	3.81309	1052.77	1039.66	1065.5
1224	Line 14 19CJ09-28065-area20C	19CJ09-28065	20C	SLV	SLVt	46.42	23.37	0.27	0.179	9.28	10.95	7.45	0	1.33	99.25	1.76786	0.953507	0.019935	0.00577344	0.295566	0.621702	0.334372	0	0.0381014	4.03682	0.677776	3.58575	3.19262	3.932	1053.23	1041.14	1063.46
1225	Line 15 19CJ09-28065-area20C	19CJ09-28065	20C	SLV	SLVt	46.15	23.38	0.274	0.182	9.33	10.91	7.45	0	1.361	99.038	1.76311	0.956916	0.0202939	0.00588867	0.298093	0.621379	0.335424	0	0.0391121	4.04021	0.6758	3.45803	3.07969	3.85013	1052.56	1038.38	1064
1226	Line 1 19CJ09-28065-area21A	19CJ09-28065	21A	SLV	SLVt	45.62	24.17	0.28	0.08	8.23	11.06	7.9	0	1.71	99.096	1.73921	0.987175	0.0206948	0.002583	0.262397	0.628602	0.354938	0	0.0490386	4.04463	0.705502	2.63333	2.24558	3.05054	1065.34	1059.4	1070.36
1227	Line 2 19CJ09-28065-area21A	19CJ09-28065	21A	SLV	SLVt	42.61	23.72	0.288	0.16	12.32	8.55	9.48	0	1.67	98.806	1.66698	0.994159	0.0218434	0.00530125	0.403082	0.498667	0.437077	0	0.0491453	4.07626	0.552999	2.33792	2.20044	2.48374	951.207	941.648	957.818
1228	Line 3 19CJ09-28065-area21A	19CJ09-28065	21A	SLV	SLVt	42.76	23.69	0.316	0.173	12.35	8.6	9.54	0	1.7	99.144	1.6668	0.98931	0.0238804	0.00571124	0.402602	0.499768	0.438252	0	0.0498472	4.07617	0.553839	2.21128	2.05558	2.36829	955.413	946.383	961.352
1229	Line 4 19CJ09-28065-area21A	19CJ09-28065	21A	SLV	SLVt	42.5	23.81	0.338	0.186	12.47	8.33	9.5	0	1.71	98.844	1.66442	0.998974	0.0256624	0.00616914	0.408416	0.486343	0.438457	0	0.050375	4.07881	0.543546	2.03008	1.90123	2.19637	944.474	937.958	952.5
1230	Line 5 19CJ09-28065-area21A	19CJ09-28065	21A	SLV	SLVt	42.47	23.97	0.303	0.205	12.07	8.47	9.46	0	1.72	98.668	1.6642	1.00626	0.0230183	0.00680322	0.395542	0.494801	0.436861	0	0.0506987	4.07818	0.555742	2.12753	1.97874	2.29874	955.713	946.809	963.143
1231	Line 6 19CJ09-28065-area21A	19CJ09-28065	21A	SLV	SLVt	41.81	23.89	0.328	0.214	12.91	7.96	9.7	0	1.67	98.483	1.65	1.01005	0.0250949	0.00715247	0.426082	0.468319	0.451134	0	0.0495754	4.08741	0.523612	2.02701	1.89465	2.21792	937.224	933.522	941.529
1232	Line 7 19CJ09-28065-area21A	19CJ09-28065	21A	SLV	SLVt	41.95	23.81	0.302	0.208	13.09	7.77	9.81	0	1.62	98.564	1.65389	1.00567	0.0230828	0.00694506	0.431596	0.456688	0.455799	0	0.0480436	4.08171	0.514124	2.21253	2.0525	2.42349	936.641	932.187	940.471
1233	Line 8 19CJ09-28065-area21A	19CJ09-28065	21A	SLV	SLVt	41.81	23.9	0.288	0.236	12.91	7.85	9.7	0	1.66	98.354	1.65205	1.01172	0.0220619	0.00789756	0.426611	0.46242	0.451694	0	0.0493397	4.0838	0.520139	2.12891	1.99337	2.30601	932.4	924.982	936.974
1234	Line 9 19CJ09-28065-area21A	19CJ09-28065	21A	SLV	SLVt	41.45	23.95	0.334	0.217	13.1	7.79	9.78	0	1.627	98.254	1.64298	1.01703	0.0256663	0.00728461	0.434253	0.460331	0.456853	0	0.0485112	4.09291	0.514576	2.04986	1.90565	2.22743	935.385	930.991	939.608
1235	Line 10 19CJ09-28065-area21A	19CJ09-28065	21A	SLV	SLVt	41.58	23.85	0.298	0.207	13.13	7.88	9.86	0.02	1.624	98.449	1.64347	1.00992	0.0228351	0.00692926	0.434016	0.464332	0.459288	0.000624961	0.0482848	4.0897	0.516873	2.14112	1.96716	2.35041	967.176	961.882	971.978
1236	Line 11 19CJ09-28065-area21A	19CJ09-28065	21A	SLV	SLVt	41.61	23.85	0.307	0.211	12.97	7.87	9.73	0	1.64	98.196	1.64798	1.01196	0.0235722	0.00707743	0.429594	0.46468	0.454148	0	0.048859	4.08787	0.519617	2.16334	1.99679	2.36167	936.489	932.321	940.546
1237	Line 12 19CJ09-28065-area21A	19CJ09-28065	21A	SLV	SLVt	41.94	23.91	0.313	0.203	12.3	8.23	9.66	0.034	1.79	98.406	1.65187	1.0089	0.0239001	0.00677146	0.40515	0.48325	0.448389	0.0010587	0.0530331	4.08232	0.543955	1.87394	1.71945	2.05685	992.73	987.064	998.886
1238	Line 1 19CJ09-28065-area22A	19CJ09-28065	22A	SLV	SLVt	44.84	23.27	0.482	0.221	11.26	9.07	9.35	0	1.601	100.102	1.71211	0.951883	0.0356796	0.00714655	0.359557	0.516294	0.420733	0	0.0459836	4.04938	0.589477	2.40157	2.13053	2.7238	970.291	962.522	982.221
1239	Line 2 19CJ09-28065-area22A	19CJ09-28065	22A	SLV	SLVt	43.87	23.33	0.427	0.26	11.31	8.93	8.69	0.025	1.593	98.435	1.71002	0.974251	0.0322679	0.00858314	0.368689	0.518932	0.399194	0.000770405	0.0467085	4.05942	0.584632	2.02785	1.79992	2.31316	980.28	965.156	996.346
1240	Line 3 19CJ09-28065-area22A	19CJ09-28065	22A	SLV	SLVt	43.83	23.38	0.44	0.213	11.4	8.79	8.73	0	1.621	98.404	1.70962	0.976999	0.0332727	0.00703633	0.371874	0.511142	0.401303	0	0.0475616	4.05881	0.578859	1.98065	1.76094	2.29381	964.184	955.463	972.177
1241	Line 4 19CJ09-28065-area22A	19CJ09-28065	22A	SLV	SLVt	44.7	23.38	0.428	0.214	10.6	9.32	8.48	0	1.561	98.697	1.72874	0.968698	0.0320903	0.0070093	0.34284	0.537357	0.386499	0	0.0454121	4.04864	0.610496	2.43061	2.15791	2.79897	986.432	974.085	1000.86
1242	Line 5 19CJ09-28065-area22A	19CJ09-28065	22A	SLV	SLVt	44.42	23.39	0.426	0.216	10.63	9.53	8.35	0.021	1.543	98.526	1.72283	0.97189	0.0320319	0.00709508	0.344796	0.551039	0.381664	0.000643916	0.0450171	4.05701	0.615113	2.38358	2.10126	2.72908	1013.42	1002.47	1026.54
1243	Line 6 19CJ09-28065-area22A	19CJ09-28065	22A	SLV	SLVt	44.63	23.36	0.451	0.242	10.66	9.44	8.45	0	1.564	98.797	1.72531	0.967463	0.0338006	0.00792307	0.344636	0.544047	0.38497	0	0.0454802	4.05363	0.612195	2.50649	2.19178	2.90076	981.337	964.796	996.743
1244	Line 7 19CJ09-28065-area22A	19CJ09-28065	22A	SLV	SLVt	44.32	23.4	0.444	0.198	10.62	9.38	8.37	0	1.561	98.303	1.72321	0.974709	0.0334679	0.0065199	0.345323	0.543707	0.383524	0	0.0456548	4.05611	0.611573	2.37777	2.10144	2.71434	987.127	973.826	1000.88
1245	Line 8 19CJ09-28065-area22A	19CJ09-28065	22A	SLV	SLVt	44.91	23.45	0.436	0.233	10.26	9.77	7.8	0	1.45	98.31	1.74207	0.974511	0.0327881	0.0076545	0.332838	0.564991	0.356572	0	0.0423093	4.05373	0.629286	2.39139	2.12123	2.71889	986.611	970.117	1005.55
1246	Line 9 19CJ09-28065-area22A	19CJ09-28065	22A	SLV	SLVt	44.34	23.29	0.498	0.295	10.92	9.19	7.92	0	1.633	98.088	1.73142	0.974313	0.0377003	0.00975591	0.35661	0.534992	0.36447	0	0.0479666	4.05723	0.600035	1.89301	1.63442	2.2284	916.209	904.688	930.542
1247	Line 12 19CJ09-28065-area22A	19CJ09-28065	22A	SLV	SLVt	45.18	23.24	0.466	0.295	10.75	9.74	7.15	0	1.624	98.464	1.75397	0.966569	0.0350727	0.00969919	0.349017	0.563714	0.327123	0	0.047425	4.05258	0.617612	1.69758	1.55721	1.92068	924.438	911.068	940.399
1248	Line 13 19CJ09-28065-area22A	19CJ09-28065	22A	SLV	SLVt	45.23	23.12	0.497	0.326	11.02	9.48	7.14	0	1.71	98.528	1.75616	0.961717	0.0374113	0.01072	0.357835	0.548745	0.326713	0	0.0499436	4.04925	0.605291	1.56338	1.42238	1.78797	896.04	883.513	909.318
1249	Line 14 19CJ09-28065-area22A	19CJ09-28065	22A	SLV	SLVt	45.27	23.18	0.485	0.35	11.07	9.51	7.06	0	1.7	98.625	1.75677	0.963695	0.0364884	0.011503	0.359265	0.550186	0.322878	0	0.0496249	4.05041	0.604965	1.49759	1.38222	1.66059	884.781	873.126	897.139
1250	Line 15 19CJ09-28065-area22A	19CJ09-28065	22A	SLV	SLVt	44.83	23.22	0.523	0.29	11.19	9.32	7.53	0	1.76	98.663	1.74097	0.966064	0.039376	0.00953802	0.363425	0.539588	0.344625	0	0.0514139	4.055	0.597542	1.73093	1.5247	1.9941	911.755	899.596	926.408
1251	Line 1 19CJ09-28065-area22B	19CJ09-28065	22B	SLV	SLVt	43.31	23.52	0.294	0.157	10.89	9.15	9.31	0	1.67	98.302	1.68791	0.982018	0.0222134	0.00518201	0.354937	0.531626	0.427602	0	0.0489579	4.06044	0.599648	2.61102	2.42946	2.82735	984.022	974.8	998.069
1252	Line 2 19CJ09-28065-area22B	19CJ09-28065	22B	SLV	SLVt	43.29	23.55	0.317	0.2	10.98	9.16	9.36	0	1.663	98.54	1.68473	0.981874	0.0239172	0.00659192	0.357362	0.531451	0.429288	0	0.0486835	4.0639	0.597933	2.5375	2.31118	2.80271	986.04	976.182	998.659
1253	Line 3 19CJ09-28065-area22B	19CJ09-28065	22B	SLV	SLVt	43.32	23.63	0.261	0.182	11.07	9.01	9.03	0	1.67	98.183	1.69298	0.989349	0.0197748	0.00602385	0.361805	0.524945	0.415893	0	0.0490938	4.05987	0.591987	2.51856	2.33888	2.76117	978.931	972.305	989.361
1254	Line 4 19CJ09-28065-area22B	19CJ09-28065	22B	SLV	SLVt	42.68	23.7	0.306	0.185	11.41	8.75	9.74	0	1.76	98.555	1.66658	0.99145	0.0231649	0.00611802	0.372606	0.50937	0.448219	0	0.0516963	4.0692	0.577533	2.29097	2.13406	2.45058	973.517	965.267	981.369
1255	Line 7 19CJ09-28065-area22B	19CJ09-28065	22B	SLV	SLVt	41.29	23.4	0.258	0.219	12.24	7.92	10.66	0	2.09	98.077	1.62862	0.988808	0.0197289	0.00731572	0.403756	0.465719	0.49552	0	0.0620107	4.07148	0.535632	2.64268	2.2852	3.32151	959.973	951.228	969.31
1256	Line 8 19CJ09-28065-area22B	19CJ09-28065	22B	SLV	SLVt	43.16	23.67	0.353	0.193	11.41	8.76	8.98	0	1.73	98.274	1.68965	0.992738	0.0267915	0.00639898	0.373563	0.511262	0.414306	0	0.0509456	4.06565	0.577811	2.03106	1.83683	2.26333	969.465	960.996	976.403
1257	Line 9 19CJ09-28065-area22B	19CJ09-28065	22B	SLV	SLVt	45.28	23.65	0.34	0.209	10.48	9.84	7.32	0	1.307	98.426	1.75568	0.982406	0.0255579	0.00686314	0.339831	0.568798	0.334487	0	0.0381206	4.05174	0.625996	2.65802	2.43438	2.94078	973.469	960.914	991.137
1258	Line 10 19CJ09-28065-area22B	19CJ09-28065	22B	SLV	SLVt	45.55	23.75	0.306	0.195	10.45	10.01	7.37	0.02	1.273	98.924	1.75603	0.980908	0.0228703	0.00636673	0.336917	0.57531	0.334842	0.000609562	0.0369162	4.05077	0.630665	2.90055	2.6184	3.22704	1004.22	993.381	1019.48
1259	Line 11 19CJ09-28065-area22B	19CJ09-28065	22B	SLV	SLVt	44.85	23.76	0.253	0.198	10.62	9.79	7.73	0	1.394	98.615	1.7383	0.986577	0.0190104	0.0064993	0.344232	0.565679	0.353079	0	0.0406417	4.05402	0.621686	2.84016	2.57358	3.11828	986.719	971.989	1003.7
1260	Line 12 19CJ09-28065-area22B	19CJ09-28065	22B	SLV	SLVt	42.13	23.57	0.313	0.212	11.76	8.37	10.01	0	1.93	98.306	1.65317	0.990851	0.0238111	0.00704533	0.38592	0.48964	0.462904	0	0.0569679	4.07031	0.559231	2.05329	1.90599	2.22229	963.281	953.934	972.454
1261	Line 4 19CJ09-28065-area18B	19CJ09-28065	18B	SLV	SLVt	43.85	23.05	0.45	0.238	11.29	9.02	8.37	0	1.91	98.186	1.713	0.964672	0.0340806	0.00787413	0.368846	0.525313	0.385339	0	0.0561263	4.05525	0.587494	1.57092	1.35604	1.82227	962.795	950.032	974.348
1262	Line 5 19CJ09-28065-area18B	19CJ09-28065	18B	SLV	SLVt	43.87	23.15	0.49	0.209	11.38	8.59	8.62	0	1.81	98.128	1.71504	0.96957	0.0371373	0.00691977	0.372059	0.500639	0.39714	0	0.0532269	4.05173	0.573668	1.71728	1.55212	1.93824	957.119	949.098	965.211
1263	Line 6 19CJ09-28065-area18B	19CJ09-28065	18B	SLV	SLVt	44.16	23.19	0.478	0.244	11.48	8.54	8.47	0	1.78	98.388	1.72256	0.969101	0.0361479	0.00806074	0.3745	0.496626	0.389368	0	0.0522291	4.0486	0.570096	1.66166	1.47598	1.88177	941.083	927.682	951.973
1264	Line 7 19CJ09-28065-area18B	19CJ09-28065	18B	SLV	SLVt	44	23.12	0.5	0.246	11.45	8.48	8.54	0	1.78	98.126	1.72038	0.96846	0.037901	0.00814602	0.374404	0.494302	0.393514	0	0.0523526	4.04946	0.569009	1.71297	1.54692	1.94504	938.793	925.08	950.352
1265	Line 8 19CJ09-28065-area18B	19CJ09-28065	18B	SLV	SLVt	43.99	23.21	0.468	0.244	11.4	8.52	8.49	0	1.8	98.123	1.71995	0.972209	0.0354746	0.00807963	0.372762	0.496623	0.391202	0	0.0529397	4.04924	0.571235	1.64268	1.46555	1.84474	943.389	929.782	954.121
1266	Line 9 19CJ09-28065-area18B	19CJ09-28065	18B	SLV	SLVt	44.97	23.21	0.473	0.231	11.1	8.93	7.79	0	1.538	98.272	1.75048	0.967904	0.0356948	0.00761528	0.361345	0.518217	0.357357	0	0.0450337	4.04365	0.589176	1.89758	1.65953	2.21826	941.824	928.902	953.675
1267	Line 10 19CJ09-28065-area18B	19CJ09-28065	18B	SLV	SLVt	44.83	23.19	0.462	0.24	11.27	8.92	7.87	0	1.565	98.351	1.74498	0.96704	0.0348636	0.00791173	0.366867	0.51762	0.361016	0	0.0458229	4.04612	0.58522	1.81399	1.62097	2.10266	939.267	926.356	951.346
1268	Line 11 19CJ09-28065-area18B	19CJ09-28065	18B	SLV	SLVt	44.78	23.38	0.537	0.241	11.02	8.97	8.13	0	1.629	98.687	1.73629	0.971192	0.0403665	0.00791397	0.357342	0.518509	0.3715	0	0.0475123	4.05063	0.592006	2.12962	1.84655	2.50014	951.954	938.436	962.967
1269	Line 12 19CJ09-28065-area18B	19CJ09-28065	18B	SLV	SLVt	44.99	23.21	0.484	0.235	11.04	8.96	7.98	0	1.598	98.497	1.74589	0.964932	0.0364127	0.00772336	0.358288	0.518361	0.364949	0	0.0466469	4.0432	0.591298	1.95754	1.69811	2.27369	950.984	938.751	962.491
1270	Line 1 19CJ09-28065-area16A	19CJ09-28065	16A	SLV	SLVt	46.4	23.61	0.312	0.188	9.28	10.44	7.21	0	1.286	98.726	1.77822	0.969362	0.0231809	0.00610189	0.297426	0.596476	0.325637	0	0.0370728	4.03348	0.667272	3.11879	2.81276	3.47925	1027.94	1002.07	1043.56
1271	Line 2 19CJ09-28065-area16A	19CJ09-28065	16A	SLV	SLVt	46.7	23.55	0.325	0.194	9.31	10.6	6.94	0	1.256	98.892	1.78636	0.965082	0.0241014	0.00628481	0.297827	0.60448	0.312853	0	0.0361399	4.03313	0.669927	3.01562	2.67678	3.37192	1027.28	1007.04	1039.66
1272	Line 3 19CJ09-28065-area16A	19CJ09-28065	16A	SLV	SLVt	46.15	23.48	0.346	0.194	9.52	10.48	7.29	0	1.369	98.829	1.76948	0.964484	0.0257193	0.00629963	0.305264	0.599047	0.329407	0	0.0394843	4.03919	0.662435	2.95233	2.64991	3.29805	1029.75	1006.07	1044.48
1273	Line 4 19CJ09-28065-area16A	19CJ09-28065	16A	SLV	SLVt	45.88	23.55	0.297	0.18	9.63	10.18	7.78	0	1.435	98.95	1.75817	0.966828	0.0220649	0.00584182	0.308622	0.58158	0.351355	0	0.0413652	4.03582	0.653312	2.96054	2.6296	3.28988	1025.35	1005.22	1048.01
1274	Line 5 19CJ09-28065-area16A	19CJ09-28065	16A	SLV	SLVt	45.91	23.5	0.29	0.202	9.52	10.36	7.57	0	1.425	98.792	1.76147	0.965958	0.0215712	0.00656385	0.30547	0.592588	0.34229	0	0.0411272	4.03704	0.659855	2.93592	2.57501	3.28336	1034.34	1011.72	1053.54
1275	Line 6 19CJ09-28065-area16A	19CJ09-28065	16A	SLV	SLVt	46.55	23.54	0.387	0.201	9.48	10.51	7.13	0	1.267	99.069	1.77931	0.963961	0.0286781	0.00650678	0.303042	0.598906	0.321182	0	0.0364296	4.03801	0.664014	3.1059	2.7939	3.43953	1022.68	1000.41	1038.67
1276	Line 7 19CJ09-28065-area16A	19CJ09-28065	16A	SLV	SLVt	46.22	23.46	0.31	0.185	9.72	10.35	7.23	0	1.318	98.802	1.77368	0.964484	0.023063	0.0060125	0.311943	0.592121	0.326974	0	0.0380458	4.03632	0.654955	3.04305	2.7572	3.3815	1018.09	994.132	1033.51
1277	Line 8 19CJ09-28065-area16A	19CJ09-28065	16A	SLV	SLVt	46.37	23.49	0.311	0.211	9.67	10.21	7.19	0	1.323	98.786	1.77896	0.965461	0.0231312	0.00685569	0.310256	0.583957	0.325079	0	0.03818	4.03188	0.65304	2.79058	2.47986	3.19705	1006.11	983.573	1028.02
1278	Line 9 19CJ09-28065-area16A	19CJ09-28065	16A	SLV	SLVt	45.15	23.3	0.354	0.244	10.45	9.63	7.67	0	1.81	98.622	1.74561	0.965089	0.0265339	0.00798947	0.337885	0.555061	0.349474	0	0.0526398	4.04028	0.621606	1.78713	1.53503	2.02259	980.526	961.075	998.308
1279	Line 10 19CJ09-28065-area16A	19CJ09-28065	16A	SLV	SLVt	45.47	23.22	0.47	0.275	10.55	9.69	7.35	0	1.78	98.826	1.75509	0.960196	0.0351708	0.00898974	0.340558	0.557602	0.334344	0	0.0516823	4.04364	0.620827	1.6667	1.47933	1.90515	948.54	932.579	967.118
1280	Line 11 19CJ09-28065-area16A	19CJ09-28065	16A	SLV	SLVt	46.55	23.34	0.401	0.262	9.88	10.2	7	0	1.385	99.031	1.78304	0.957778	0.029778	0.00849928	0.316492	0.582462	0.315988	0	0.039906	4.03395	0.647933	2.35483	2.09637	2.68238	975.25	953.446	1000.49
1281	Line 12 19CJ09-28065-area16A	19CJ09-28065	16A	SLV	SLVt	46.33	23.56	0.35	0.194	9.38	10.8	6.96	0.022	1.414	99.024	1.77276	0.965795	0.0259635	0.00628678	0.300161	0.616079	0.313854	0.000665511	0.040699	4.04226	0.672399	2.8008	2.39617	3.21479	1049.84	1037.52	1060.39
1282	Line 13 19CJ09-28065-area16A	19CJ09-28065	16A	SLV	SLVt	46.1	23.6	0.358	0.21	9.48	10.8	6.95	0	1.55	99.074	1.76566	0.968369	0.0265827	0.00681185	0.303654	0.616674	0.313705	0	0.0446565	4.04612	0.670059	2.34728	2.03101	2.74044	1035.03	1021.58	1047.36
1283	Line 2 19CJ09-28065-area17	19CJ09-28065	17	SLV	SLVt	43.13	23.9	0.256	0.197	11.02	9.04	9.33	0	1.88	98.773	1.67719	0.995684	0.0192997	0.00648794	0.358382	0.524077	0.427576	0	0.0549928	4.06368	0.593882	2.37755	2.19214	2.53981	983.774	976.299	995.263
1284	Line 3 19CJ09-28065-area17	19CJ09-28065	17	SLV	SLVt	44.21	24.11	0.303	0.202	10.7	9.61	8.2	0	1.73	99.065	1.71038	0.999292	0.0227261	0.00661856	0.346195	0.55427	0.373867	0	0.0503461	4.0637	0.615538	2.28099	1.95535	2.5572	997.474	984.088	1011.61
1285	Line 4 19CJ09-28065-area17	19CJ09-28065	17	SLV	SLVt	44.82	24.21	0.282	0.174	10.23	10	7.89	0	1.59	99.209	1.72605	0.998846	0.0210542	0.00567505	0.329474	0.574125	0.358087	0	0.0460601	4.05937	0.635376	2.52968	2.25491	2.82122	1011.84	997.131	1032.88
1286	Line 5 19CJ09-28065-area17	19CJ09-28065	17	SLV	SLVt	44.66	24.16	0.284	0.17	10.26	9.97	7.93	0	1.664	99.099	1.72224	0.998145	0.0212325	0.00555217	0.330892	0.573185	0.360394	0	0.0482697	4.05991	0.634	2.39177	2.08795	2.69615	1010.95	996.587	1031.48
1287	Line 6 19CJ09-28065-area17	19CJ09-28065	17	SLV	SLVt	43.74	24.05	0.279	0.152	10.77	9.43	8.52	0	1.77	98.711	1.69937	1.00103	0.0210146	0.00500139	0.349935	0.546191	0.390102	0	0.0517282	4.06436	0.609503	2.38406	2.02665	2.67088	993.395	980.203	1006.16
1288	Line 7 19CJ09-28065-area17	19CJ09-28065	17	SLV	SLVt	43.87	24.07	0.273	0.147	10.75	9.45	8.49	0	1.73	98.789	1.70253	1.00075	0.0205399	0.00483151	0.348898	0.546743	0.388297	0	0.0505032	4.06309	0.610449	2.4459	2.15104	2.71251	994.455	981.883	1007.25
1289	Line 8 19CJ09-28065-area17	19CJ09-28065	17	SLV	SLVt	43.89	23.97	0.212	0.148	10.71	9.38	8.58	0	1.74	98.647	1.70429	0.997165	0.0159596	0.00486718	0.3478	0.543006	0.39264	0	0.0508244	4.05655	0.609567	2.48584	2.2162	2.73168	993.805	981.458	1008.09
1290	Line 9 19CJ09-28065-area17	19CJ09-28065	17	SLV	SLVt	43.75	23.99	0.316	0.175	11	9.3	8.62	0	1.68	98.831	1.69919	0.998198	0.0237936	0.00575627	0.35729	0.538484	0.39455	0	0.0490818	4.06635	0.601138	2.38898	2.07341	2.66601	986.053	974.769	998.706
1291	Line 10 19CJ09-28065-area17	19CJ09-28065	17	SLV	SLVt	43.95	23.96	0.238	0.173	10.81	9.59	8.5	0	1.586	98.807	1.70464	0.995594	0.0178961	0.00568275	0.350641	0.55452	0.388528	0	0.0462725	4.06377	0.61262	2.75312	2.52796	3.06034	997.284	984.931	1011.32
1292	Line 11 19CJ09-28065-area17	19CJ09-28065	17	SLV	SLVt	44.74	24.06	0.29	0.127	10.2	10.07	8.17	0	1.379	99.051	1.72403	0.993269	0.0216648	0.00414469	0.32871	0.5785	0.371024	0	0.0399724	4.06132	0.637669	3.26816	2.93605	3.65121	1014.11	997.943	1034.28
1293	Line 12 19CJ09-28065-area17	19CJ09-28065	17	SLV	SLVt	44.96	24.09	0.287	0.136	9.91	10.29	7.86	0	1.336	98.869	1.73307	0.994829	0.0214477	0.00443984	0.319468	0.59133	0.357061	0	0.0387385	4.06038	0.649244	3.28046	2.96846	3.6842	1028.13	1006.27	1045.76
1294	Line 13 19CJ09-28065-area17	19CJ09-28065	17	SLV	SLVt	45.39	24.18	0.274	0.126	9.36	10.61	7.6	0	1.309	98.853	1.74458	0.995653	0.0204169	0.00410147	0.300863	0.607953	0.34425	0	0.0378456	4.05566	0.66895	3.51062	3.14721	3.85346	1046.64	1029.24	1057.88
1295	Line 1 19CJ09-28065-area13C	19CJ09-28065	13C	SLV	SLVt	48.95	23.88	0.237	0.125	6.97	12.77	5.56	0.03	0.98	99.527	1.83535	0.959227	0.0172275	0.0039693	0.218555	0.713807	0.24568	0.000889266	0.02764	4.02234	0.76559	2.18165	2.10048	2.27632	1054.03	1048.51	1059.52
1296	Line 2 19CJ09-28065-area13C	19CJ09-28065	13C	SLV	SLVt	46.39	23.79	0.243	0.149	8.94	11.04	7.58	0	1.256	99.404	1.76329	0.968757	0.0179066	0.00479649	0.284184	0.625594	0.339545	0	0.0359116	4.03998	0.687634	3.88105	3.5255	4.18837	1062.61	1053.74	1070.54
1297	Line 3 19CJ09-28065-area13C	19CJ09-28065	13C	SLV	SLVt	46.68	23.83	0.287	0.104	8.56	11.32	7.49	0.039	1.315	99.636	1.76644	0.966084	0.0210552	0.00333304	0.270898	0.638617	0.334026	0.00116675	0.0374318	4.03906	0.702151	3.87011	3.51365	4.16909	1078.02	1073.33	1082.58
1298	Line 4 19CJ09-28065-area13C	19CJ09-28065	13C	SLV	SLVt	48.54	23.97	0.175	0.104	7.36	12.54	5.8	0.035	1.054	99.578	1.82313	0.96451	0.0127428	0.00330818	0.231184	0.702165	0.256729	0.00103927	0.0297786	4.02458	0.752307	2.35936	2.24307	2.4738	1061.79	1056.4	1066.63
1299	Line 5 19CJ09-28065-area13C	19CJ09-28065	13C	SLV	SLVt	47.21	23.89	0.202	0.12	8.41	11.61	6.73	0	1.151	99.343	1.78959	0.970194	0.014845	0.00385248	0.266612	0.656111	0.300653	0	0.0328203	4.03468	0.711059	2.98742	2.72273	3.33683	1059.56	1051.86	1067.71
1300	Line 6 19CJ09-28065-area13C	19CJ09-28065	13C	SLV	SLVt	46.4	23.79	0.283	0.109	8.81	10.5	7.22	0	1.232	98.365	1.78129	0.978435	0.0210625	0.0035439	0.282849	0.600938	0.32665	0	0.0355773	4.03034	0.679958	3.48272	3.13407	3.84777	1039.95	1014.84	1053.33
1301	Line 7 19CJ09-28065-area13C	19CJ09-28065	13C	SLV	SLVt	46.55	23.82	0.217	0.127	8.87	10.59	7.24	0	1.247	98.676	1.78105	0.976385	0.0160963	0.00411528	0.283821	0.604057	0.326457	0	0.0358897	4.02788	0.680338	3.32864	3.00342	3.66537	1045.67	1027.44	1056.21
1302	Line 8 19CJ09-28065-area13C	19CJ09-28065	13C	SLV	SLVt	46.37	23.75	0.199	0.118	9.01	10.43	7.54	0	1.266	98.696	1.77442	0.973656	0.0147632	0.0038242	0.288342	0.595017	0.340033	0	0.0364418	4.0265	0.673584	3.42049	3.08789	3.72539	1038.88	1014.28	1052.49
1303	Line 9 19CJ09-28065-area13C	19CJ09-28065	13C	SLV	SLVt	45.73	23.69	0.303	0.153	9.29	10.08	7.91	0	1.318	98.482	1.75856	0.975984	0.0225895	0.00498294	0.298769	0.577885	0.358478	0	0.0381257	4.03537	0.659194	3.37562	3.02223	3.74344	1020.51	1002.96	1045.65
1304	Line 10 19CJ09-28065-area13C	19CJ09-28065	13C	SLV	SLVt	45.82	23.71	0.27	0.149	9.12	10.26	7.67	0	1.308	98.347	1.76368	0.977729	0.0201483	0.00485725	0.293578	0.588759	0.347929	0	0.0378721	4.03456	0.667272	3.36977	3.06999	3.7251	1031.58	1005.56	1050.91
1305	Line 11 19CJ09-28065-area13C	19CJ09-28065	13C	SLV	SLVt	45.22	23.63	0.258	0.132	9.57	9.76	8.46	0	1.388	98.422	1.74242	0.975456	0.019273	0.0043076	0.308388	0.560657	0.384169	0	0.0402307	4.0349	0.645141	3.44594	3.11514	3.83687	1011.85	1001.89	1027.7
1306	Line 12 19CJ09-28065-area13C	19CJ09-28065	13C	SLV	SLVt	45.34	23.62	0.241	0.153	9.59	9.86	8.28	0.022	1.358	98.464	1.74638	0.974673	0.0179963	0.004991	0.308915	0.566186	0.375853	0.000669923	0.0393462	4.03501	0.646995	3.43227	3.10529	3.80695	1033.7	1024.83	1045.63
1307	Line 2 19CJ09-28065-area13B	19CJ09-28065	13B	SLV	SLVt	45.34	23.53	0.463	0.289	12.44	8.47	6.46	0	1.194	98.186	1.78003	0.989669	0.03524	0.0096091	0.408442	0.495741	0.298888	0	0.0352612	4.05288	0.548275	1.59312	1.48663	1.70327	865.333	858.721	871.734
1308	Line 3 19CJ09-28065-area13B	19CJ09-28065	13B	SLV	SLVt	45.33	23.51	0.514	0.348	12.45	8.45	6.43	0	1.218	98.25	1.77941	0.988701	0.0391167	0.0115693	0.408718	0.494507	0.297462	0	0.0359653	4.05545	0.54749	1.44765	1.35984	1.58292	844.051	838.435	851.853
1309	Line 5 19CJ09-28065-area13B	19CJ09-28065	13B	SLV	SLVt	44.46	23.8	0.377	0.203	10.87	8.95	8.08	0	1.55	98.293	1.73217	0.993388	0.0284754	0.00669815	0.354171	0.519838	0.370989	0	0.0454253	4.05115	0.594774	2.11382	1.87708	2.4431	967.967	958.708	978.327
1310	Line 6 19CJ09-28065-area13B	19CJ09-28065	13B	SLV	SLVt	44.29	23.8	0.358	0.229	10.86	8.95	8.15	0	1.579	98.216	1.72753	0.994534	0.0270715	0.00756475	0.354253	0.520437	0.374635	0	0.0463286	4.05236	0.594996	2.08827	1.84811	2.36013	968.479	956.865	978.997
1311	Line 8 19CJ09-28065-area13B	19CJ09-28065	13B	SLV	SLVt	44.17	23.85	0.351	0.177	10.79	8.69	8.38	0	1.65	98.077	1.72476	0.997726	0.0265715	0.00585346	0.352359	0.505878	0.385634	0	0.0484653	4.04725	0.589438	2.02999	1.81536	2.28458	969.479	959.526	978.1
1312	Line 10 19CJ09-28065-area13B	19CJ09-28065	13B	SLV	SLVt	44.79	23.57	0.472	0.31	11.91	8.67	6.8	0	1.573	98.102	1.75849	0.991381	0.035926	0.0103076	0.391052	0.507461	0.314629	0	0.0464552	4.0557	0.564779	1.37447	1.29196	1.49406	865.866	855.46	873.749
1313	Line 12 19CJ09-28065-area13B	19CJ09-28065	13B	SLV	SLVt	44.68	23.44	0.518	0.314	11.99	9.01	7.34	0	1.617	98.908	1.73957	0.977703	0.039099	0.0103537	0.3904	0.52297	0.336786	0	0.047357	4.06423	0.572572	1.539	1.38596	1.74304	874.234	861.099	885.141
1314	Line 13 19CJ09-28065-area13B	19CJ09-28065	13B	SLV	SLVt	44.71	23.54	0.447	0.306	12.11	8.99	7.25	0	1.636	99.002	1.74038	0.981673	0.033733	0.0100879	0.394227	0.521703	0.332588	0	0.0479036	4.06229	0.569588	1.48401	1.36488	1.6386	877.822	865.447	886.328
1315	Line 2 19CJ09-28065-area8A	19CJ09-28065	8A	SLV	SLVt	40.52	24.62	0.346	0.257	12.93	7.62	9.01	0	1.69	98.416	1.63593	1.06489	0.027082	0.00878755	0.436574	0.458644	0.428697	0	0.051325	4.11194	0.512327	1.78842	1.67149	1.94687	917.265	901.346	925.614
1316	Line 3 19CJ09-28065-area8A	19CJ09-28065	8A	SLV	SLVt	41.06	23.5	0.413	0.259	13.79	7.37	10.17	0	2.34	98.902	1.62149	0.994226	0.0316194	0.00866232	0.455432	0.433898	0.473311	0	0.0695117	4.08815	0.487893	1.55184	1.40777	1.72486	914.377	902.24	924.769
1317	Line 4 19CJ09-28065-area8A	19CJ09-28065	8A	SLV	SLVt	40.34	24.14	0.346	0.218	13.5	7.22	9.75	0	2.31	98.332	1.61547	1.03567	0.0268625	0.00739363	0.452127	0.431047	0.460148	0	0.0695858	4.0983	0.488066	1.61049	1.45622	1.79817	928.464	923.354	933.313
1318	Line 5 19CJ09-28065-area8A	19CJ09-28065	8A	SLV	SLVt	41.9	23.63	0.361	0.253	13.33	7.81	9.62	0.028	2.11	99.042	1.64654	0.994816	0.0275025	0.00842008	0.438077	0.457544	0.445515	0.000869881	0.0623714	4.08165	0.510868	1.49692	1.33904	1.62883	969.278	958.061	977.65
1319	Line 6 19CJ09-28065-area8A	19CJ09-28065	8A	SLV	SLVt	41.63	23.65	0.293	0.249	13.3	7.88	9.72	0	2.24	98.973	1.63774	0.996764	0.0223468	0.00829617	0.437577	0.462158	0.450646	0	0.0662878	4.08182	0.51366	1.83041	1.66258	1.99658	927.146	913.27	933.595
1320	Line 7 19CJ09-28065-area8A	19CJ09-28065	8A	SLV	SLVt	41.5	23.6	0.303	0.204	13.15	7.83	9.97	0.023	2.35	98.93	1.63164	0.994052	0.0230954	0.00679273	0.432379	0.458946	0.461956	0.000714905	0.0695008	4.07907	0.514903	1.66092	1.46925	1.90036	970.548	965.064	975.382
1321	Line 8 19CJ09-28065-area8A	19CJ09-28065	8A	SLV	SLVt	41.05	23.61	0.35	0.238	13.32	7.74	10.24	0	2.5	99.047	1.61533	0.99533	0.0267009	0.00793167	0.438346	0.454062	0.474875	0	0.0740006	4.08658	0.508805	1.59037	1.41949	1.8052	937.7	929.568	943.419
1322	Line 9 19CJ09-28065-area8A	19CJ09-28065	8A	SLV	SLVt	40.77	23.49	0.421	0.229	13.49	7.48	10.36	0	2.62	98.866	1.60938	0.993399	0.0322188	0.00765584	0.445343	0.440195	0.481957	0	0.0777976	4.08795	0.497094	1.44964	1.22882	1.79424	937.271	930.339	943.758
1323	Line 10 19CJ09-28065-area8A	19CJ09-28065	8A	SLV	SLVt	40.45	23.41	0.348	0.216	13.67	7.3	10.56	0.021	2.67	98.645	1.60172	0.993097	0.0267151	0.00724371	0.45269	0.430939	0.492791	0.000657404	0.0795291	4.08538	0.487693	1.47997	1.21321	2.08371	962.895	955.779	971.119
1324	Line 11 19CJ09-28065-area8A	19CJ09-28065	8A	SLV	SLVt	39.64	23.38	0.337	0.23	14.21	6.81	11.12	0	3.01	98.742	1.57436	0.994801	0.0259482	0.00773635	0.471984	0.40322	0.52048	0	0.0899254	4.08845	0.460715	2.68647	1.99591	3.46035	943.388	933.394	955.435
1325	Line 12 19CJ09-28065-area8A	19CJ09-28065	8A	SLV	SLVt	39.73	23.35	0.393	0.216	14.33	6.64	11.04	0.022	3.02	98.741	1.57859	0.993939	0.0302727	0.00726848	0.476169	0.393318	0.516952	0.000691064	0.0902618	4.08746	0.452357	2.07264	1.39135	2.79653	958.287	949.81	968.66
1326	Line 13 19CJ09-28065-area8A	19CJ09-28065	8A	SLV	SLVt	40.16	23.43	0.361	0.207	14.16	7.05	10.89	0	2.85	99.128	1.58696	0.991898	0.0276559	0.00692759	0.46795	0.415324	0.507144	0	0.0847157	4.08858	0.470209	2.32333	1.61558	2.87479	942.482	934.631	953.006
1327	Line 2 20MAL08b-28284-area16	20MAL08b-28284	16	SLV	SLVa	42.32	23.75	0.277	0.12	9.87	8.92	10.6	0	2.82	98.901	1.63833	0.98501	0.0207895	0.00393437	0.319548	0.514808	0.483605	0	0.0821203	4.04814	0.617012	1.9804	1.58578	2.81896	1009.13	999.533	1021.74
1328	Line 3 20MAL08b-28284-area16	20MAL08b-28284	16	SLV	SLVa	45.09	23.91	0.278	0.067	8.25	10.82	8.29	0.036	2.18	98.977	1.72177	0.978131	0.0205801	0.00216675	0.263459	0.615953	0.373061	0.00108678	0.0626178	4.03883	0.700415	1.34143	0.954973	1.78421	1070.71	1064.35	1075.85
1329	Line 4 20MAL08b-28284-area16	20MAL08b-28284	16	SLV	SLVa	46.05	24.03	0.218	0.092	7.89	11.34	7.69	0.042	2	99.362	1.74553	0.975827	0.01602	0.00295341	0.250114	0.640819	0.343521	0.00125861	0.0570261	4.03307	0.719267	1.31454	0.987555	1.72989	1078.35	1073.53	1084.74
1330	Line 5 20MAL08b-28284-area16	20MAL08b-28284	16	SLV	SLVa	45.32	23.99	0.182	0.077	7.93	11.09	7.83	0.026	2.13	98.575	1.73391	0.983307	0.0134995	0.00249498	0.253731	0.632548	0.353044	0.000786421	0.0613003	4.03462	0.713712	1.50274	1.16691	1.84577	1075	1068.56	1081.01
1331	Line 6 20MAL08b-28284-area16	20MAL08b-28284	16	SLV	SLVa	44.01	23.87	0.26	0.094	8.73	10.49	8.89	0	2.41	98.854	1.69047	0.98227	0.0193615	0.0030579	0.280437	0.600699	0.402428	0	0.0696338	4.04836	0.681733	1.50508	1.284	1.79967	1066.08	1053.98	1073.78
1332	Line 7 20MAL08b-28284-area16	20MAL08b-28284	16	SLV	SLVa	46.64	24.06	0.204	0.084	7.43	12.02	6.74	0.066	1.569	98.819	1.77325	0.980008	0.0150366	0.00270477	0.236246	0.681304	0.301996	0.00198381	0.0448726	4.0374	0.742525	1.53769	1.23028	1.87552	1070.44	1064.51	1074.85
1333	Line 8 20MAL08b-28284-area16	20MAL08b-28284	16	SLV	SLVa	46.89	24.02	0.207	0.095	7.28	12.2	6.48	0.083	1.472	98.737	1.78245	0.978212	0.0152552	0.00305844	0.231437	0.691389	0.290297	0.00249437	0.0420913	4.03669	0.749208	1.69984	1.4775	1.94633	1069.55	1063.81	1075.21
1334	Line 9 20MAL08b-28284-area16	20MAL08b-28284	16	SLV	SLVa	48.71	24.3	0.12	0.09	6.21	13.22	4.99	0.041	1.014	98.697	1.83877	0.982738	0.00878212	0.00287734	0.196049	0.743988	0.221994	0.0012236	0.0287935	4.02522	0.791445	2.58702	2.50014	2.66644	1085.31	1079.74	1092.57
1335	Line 10 20MAL08b-28284-area16	20MAL08b-28284	16	SLV	SLVa	47.82	24.25	0.221	0.077	6.97	12.5	5.81	0.038	1.249	98.943	1.80956	0.983097	0.016213	0.0024677	0.220576	0.705176	0.259101	0.00113682	0.0355526	4.03288	0.761733	2.09056	1.96557	2.23277	1061.36	1054.3	1069.26
1336	Line 11 20MAL08b-28284-area16	20MAL08b-28284	16	SLV	SLVa	48.09	24.21	0.184	0.09	6.56	12.9	5.45	0.054	1.154	98.694	1.82017	0.98169	0.0135016	0.00288495	0.207647	0.727901	0.2431	0.00161583	0.0328556	4.03137	0.778048	2.24715	2.10509	2.38004	1061.22	1055.2	1068.72
1337	Line 12 20MAL08b-28284-area16	20MAL08b-28284	16	SLV	SLVa	49.23	24.36	0.15	0.086	6.11	13.37	4.85	0.087	1.016	99.258	1.84586	0.978516	0.0109036	0.0027309	0.19159	0.747351	0.214309	0.00257889	0.0286555	4.02249	0.795951	2.30248	2.19906	2.4055	1073.99	1068.16	1080.28
1338	Line 13 20MAL08b-28284-area16	20MAL08b-28284	16	SLV	SLVa	48.24	24.21	0.199	0.119	6.5	12.83	5.36	0.034	1.178	98.677	1.82541	0.981455	0.0145987	0.00381364	0.205698	0.723778	0.239028	0.00101713	0.0335309	4.02833	0.778694	2.15349	2.03457	2.26461	1066.21	1059.65	1072.83
1339	Line 1 20MAL08b-28284-area4	20MAL08b-28284	4	SLV	SLVa	47.52	24.09	0.18	0.092	6.9	12.68	5.96	0.112	1.362	98.912	1.79895	0.977016	0.0132106	0.00294964	0.218452	0.715627	0.2659	0.00335201	0.0387852	4.03424	0.766131	2.0948	1.90634	2.28319	1065.31	1058.45	1072.51
1340	Line 2 20MAL08b-28284-area4	20MAL08b-28284	4	SLV	SLVa	48.65	24.33	0.18	0.101	6.48	13.2	5.25	0.039	1.114	99.347	1.8275	0.979126	0.0131086	0.00321318	0.20357	0.73922	0.232415	0.0011582	0.0314779	4.03079	0.784077	2.25465	2.13703	2.38588	1067.87	1061.48	1073.88
1341	Line 3 20MAL08b-28284-area4	20MAL08b-28284	4	SLV	SLVa	48.17	24.28	0.157	0.091	6.58	13	5.61	0.054	1.3	99.246	1.81316	0.979105	0.0114569	0.00290094	0.207133	0.729503	0.248858	0.00160693	0.0368085	4.03053	0.778855	2.15636	2.05209	2.32103	1066.07	1059	1074.28
1342	Line 4 20MAL08b-28284-area4	20MAL08b-28284	4	SLV	SLVa	48.51	24.26	0.163	0.062	6.32	13.25	5.32	0.063	1.199	99.151	1.82434	0.977433	0.0118842	0.00197472	0.198772	0.742874	0.235785	0.00187309	0.0339187	4.02885	0.78891	2.26871	2.10962	2.40887	1065.99	1060.36	1072.57
1343	Line 5 20MAL08b-28284-area4	20MAL08b-28284	4	SLV	SLVa	48.65	24.3	0.201	0.108	6.02	13.28	4.99	0.068	1.149	98.766	1.8349	0.981877	0.0146972	0.00344978	0.189884	0.74671	0.221799	0.0020276	0.0325983	4.02794	0.797261	2.06161	1.915	2.18599	1066.88	1060.01	1074.39
1344	Line 6 20MAL08b-28284-area4	20MAL08b-28284	4	SLV	SLVa	48.98	24.29	0.199	0.075	6.03	13.44	4.87	0.104	1.066	99.086	1.84073	0.977957	0.0144988	0.0023871	0.189518	0.752999	0.21569	0.00308993	0.0301352	4.027	0.798923	1.98598	1.86144	2.12888	1067.05	1061.55	1072.6
1345	Line 7 20MAL08b-28284-area4	20MAL08b-28284	4	SLV	SLVa	47.83	24.25	0.176	0.073	6.62	12.67	5.59	0.046	1.227	98.482	1.81542	0.986075	0.0129508	0.00234659	0.210135	0.716931	0.250045	0.00138032	0.0350322	4.03031	0.773334	2.24771	2.10248	2.41259	1065.76	1057.68	1072.88
1346	Line 8 20MAL08b-28284-area4	20MAL08b-28284	4	SLV	SLVa	48.45	24.29	0.15	0.118	6.26	13.25	4.95	0.035	1.095	98.598	1.83296	0.984485	0.0110017	0.00378077	0.19806	0.74731	0.220696	0.00104682	0.0311616	4.03051	0.790494	2.44651	2.32145	2.55603	1075.75	1070.63	1081.44
1347	Line 10 20MAL08b-28284-area4	20MAL08b-28284	4	SLV	SLVa	48.98	24.38	0.211	0.107	6.32	13.2	5.01	0	1.075	99.298	1.83891	0.980612	0.0153579	0.00340223	0.198437	0.738823	0.221671	0	0.0303596	4.02757	0.78828	2.21924	2.11093	2.3063	1068.87	1063.05	1074.7
1348	Line 11 20MAL08b-28284-area4	20MAL08b-28284	4	SLV	SLVa	48.64	24.27	0.185	0.103	6.48	12.92	5.21	0.025	1.191	99.038	1.83248	0.979573	0.0135122	0.00328641	0.204166	0.725659	0.23132	0.000744612	0.0337523	4.02449	0.780425	2.1638	2.03368	2.31048	1073.96	1067.81	1080.19
1349	Line 12 20MAL08b-28284-area4	20MAL08b-28284	4	SLV	SLVa	48.09	24.3	0.143	0.083	6.38	12.81	5.07	0	1.227	98.112	1.8301	0.990713	0.0105503	0.00267508	0.203051	0.726765	0.227383	0	0.0351245	4.02636	0.781623	2.29003	2.13654	2.49826	1079.74	1074.06	1085.5
1350	Line 13 20MAL08b-28284-area4	20MAL08b-28284	4	SLV	SLVa	48.01	24.3	0.136	0.076	6.61	12.59	5.36	0	1.32	98.416	1.82307	0.988555	0.010012	0.00244413	0.209912	0.712727	0.239865	0	0.0377045	4.02429	0.772487	2.18754	2.09696	2.34908	1075.55	1068.05	1083.82
1351	Line 14 20MAL08b-28284-area4	20MAL08b-28284	4	SLV	SLVa	47.81	24.05	0.161	0.102	6.45	12.37	5.82	0	1.237	98.033	1.82003	0.980837	0.0118821	0.00328851	0.205345	0.702028	0.261104	0	0.0354222	4.01994	0.773693	2.23918	2.10966	2.41833	1079.74	1071.28	1088.69
1352	Line 15 20MAL08b-28284-area4	20MAL08b-28284	4	SLV	SLVa	47.69	24.23	0.202	0.087	6.7	12.49	5.66	0	1.352	98.41	1.8125	0.986563	0.0148836	0.00280032	0.212955	0.70768	0.253511	0	0.038652	4.02954	0.768687	1.95135	1.85451	2.07549	1070.81	1063.44	1079.72
1353	Line 16 20MAL08b-28284-area4	20MAL08b-28284	4	SLV	SLVa	48.44	24.24	0.172	0.093	6.45	12.86	5.41	0.062	1.341	99.068	1.82431	0.978023	0.0125583	0.00296631	0.20315	0.722038	0.240116	0.001846	0.03799	4.023	0.780423	2.10132	1.97452	2.24229	1069.06	1061.93	1076.64
1354	Line 17 20MAL08b-28284-area4	20MAL08b-28284	4	SLV	SLVa	48.58	24.33	0.162	0.078	6.04	13.16	5.08	0.116	1.264	98.81	1.83161	0.982745	0.0118413	0.00249063	0.190448	0.739703	0.22572	0.00345764	0.0358484	4.02387	0.79525	1.94707	1.81765	2.1287	1075.38	1069.34	1082.64
1355	Line 18 20MAL08b-28284-area4	20MAL08b-28284	4	SLV	SLVa	48.68	24.36	0.162	0.077	5.85	13.19	4.93	0.106	1.212	98.574	1.83814	0.985431	0.0118591	0.00246239	0.184734	0.7425	0.219384	0.0031643	0.0344251	4.02209	0.800769	1.98469	1.84068	2.1655	1079.19	1072.59	1085.74
1356	Line 19 20MAL08b-28284-area4	20MAL08b-28284	4	SLV	SLVa	48.38	24.37	0.151	0.086	6.03	13.24	4.99	0.091	1.236	98.577	1.8296	0.987344	0.0110707	0.00275441	0.190709	0.746456	0.222393	0.00272068	0.0351606	4.02821	0.796504	2.00594	1.88119	2.18293	1076.67	1071.15	1083.36
1357	Line 20 20MAL08b-28284-area4	20MAL08b-28284	4	SLV	SLVa	47.91	24.22	0.13	0.089	6.71	12.61	5.55	0.052	1.409	98.681	1.81509	0.983034	0.00954826	0.00285562	0.212598	0.712217	0.247797	0.00155747	0.0401541	4.02485	0.770119	2.09283	1.97214	2.20082	1076.83	1069.6	1084.02
1358	Line 21 20MAL08b-28284-area4	20MAL08b-28284	4	SLV	SLVa	47.38	24.16	0.212	0.075	6.83	12.48	5.69	0.032	1.383	98.259	1.80602	0.986613	0.0156665	0.00242119	0.217727	0.709198	0.255606	0.000964324	0.0396549	4.03387	0.765108	2.03	1.9049	2.15327	1068.36	1060.82	1076.69
1359	Line 22 20MAL08b-28284-area4	20MAL08b-28284	4	SLV	SLVa	47.67	24.3	0.192	0.062	6.72	12.58	5.57	0.043	1.337	98.473	1.81146	0.989261	0.0141446	0.00199532	0.213558	0.712669	0.249441	0.0012918	0.0382173	4.03203	0.769433	2.05097	1.91342	2.21203	1064.32	1057.61	1071.68
1360	Line 2 20MAL08b-28284-area3	20MAL08b-28284	3	SLV	SLVa	45.64	23.7	0.168	0.081	7.45	12.26	7.15	0.083	1.86	98.391	1.7448	0.97067	0.0124514	0.00262256	0.238189	0.698742	0.322135	0.00250856	0.0534885	4.04561	0.745778	1.2024	0.909431	1.529	1072.32	1066.69	1078.26
1361	Line 3 20MAL08b-28284-area3	20MAL08b-28284	3	SLV	SLVa	46.51	23.82	0.174	0.054	6.99	12.72	6.48	0.098	1.599	98.461	1.77137	0.97191	0.0128475	0.00174179	0.22264	0.722228	0.290849	0.00295076	0.0458097	4.04235	0.764369	1.59299	1.29811	1.8302	1058.33	1055.08	1063.5
1362	Line 4 20MAL08b-28284-area3	20MAL08b-28284	3	SLV	SLVa	47.42	23.98	0.208	0.12	7.29	12.51	5.99	0	1.39	98.916	1.7978	0.97398	0.015288	0.003853	0.231137	0.707068	0.267631	0	0.0396406	4.03639	0.753639	1.9586	1.84732	2.081	1060.44	1054.41	1066.58
1363	Line 5 20MAL08b-28284-area3	20MAL08b-28284	3	SLV	SLVa	47.69	24.1	0.155	0.089	6.95	12.68	5.69	0	1.327	98.699	1.80878	0.979256	0.0113972	0.00285882	0.220448	0.716971	0.254331	0	0.0378595	4.0319	0.764835	2.17795	2.08494	2.30055	1066.68	1061.22	1073.38
1364	Line 6 20MAL08b-28284-area3	20MAL08b-28284	3	SLV	SLVa	47.71	24.02	0.144	0.062	6.9	12.54	5.69	0	1.386	98.472	1.8123	0.977495	0.0106045	0.00199457	0.219196	0.710137	0.254719	0	0.0396031	4.02604	0.764136	2.23793	2.15125	2.33841	1064.55	1059.52	1071.54
1365	Line 7 20MAL08b-28284-area3	20MAL08b-28284	3	SLV	SLVa	47.34	24.05	0.187	0.083	7.01	12.64	5.94	0	1.399	98.667	1.79762	0.97838	0.0137664	0.00266924	0.222614	0.715554	0.26582	0	0.0399608	4.03639	0.762714	1.96844	1.83664	2.12722	1063.58	1058.3	1071.49
1366	Line 8 20MAL08b-28284-area3	20MAL08b-28284	3	SLV	SLVa	47.53	24.07	0.153	0.065	7.04	12.75	5.99	0.034	1.44	99.072	1.79651	0.974674	0.0112114	0.00208072	0.222535	0.71845	0.26682	0.00101598	0.0409421	4.03424	0.763509	2.18414	2.05242	2.29884	1062.59	1057.59	1069.02
1367	Line 9 20MAL08b-28284-area3	20MAL08b-28284	3	SLV	SLVa	47.86	24.11	0.168	0.079	6.95	12.71	5.79	0	1.404	99.089	1.80732	0.975395	0.0122993	0.00252655	0.219487	0.715536	0.257674	0	0.0398818	4.03012	0.76526	2.10744	1.98531	2.23003	1065.02	1059.36	1072.57
1368	Line 10 20MAL08b-28284-area3	20MAL08b-28284	3	SLV	SLVa	47.81	24.15	0.174	0.093	6.85	12.76	5.73	0	1.309	98.887	1.80881	0.978846	0.0127624	0.00297987	0.216735	0.719699	0.255482	0	0.037253	4.03257	0.768553	2.11127	1.99337	2.24288	1066.06	1060.07	1073.41
1369	Line 11 20MAL08b-28284-area3	20MAL08b-28284	3	SLV	SLVa	47.59	24.08	0.175	0.081	7.05	12.6	6.01	0.019	1.402	99.007	1.79979	0.975628	0.0128308	0.00259436	0.222976	0.710397	0.267862	0.000568073	0.0398841	4.03253	0.761107	2.11243	1.95753	2.25521	1065.38	1059.15	1073.65
1370	Line 12 20MAL08b-28284-area3	20MAL08b-28284	3	SLV	SLVa	47.86	24.14	0.167	0.09	6.97	12.67	5.89	0	1.402	99.205	1.80537	0.975556	0.0122129	0.00287524	0.219882	0.712516	0.261842	0	0.0397821	4.03003	0.764176	2.05378	1.92745	2.16231	1066.52	1060.49	1074.47
1371	Line 13 20MAL08b-28284-area3	20MAL08b-28284	3	SLV	SLVa	47.98	24.11	0.179	0.086	7.02	12.7	5.71	0	1.373	99.176	1.81057	0.974707	0.0130953	0.00274848	0.221542	0.714469	0.253934	0	0.0389737	4.03004	0.763313	2.03436	1.9171	2.17116	1064.49	1058.82	1070.67
1372	Line 14 20MAL08b-28284-area3	20MAL08b-28284	3	SLV	SLVa	47.77	24.06	0.18	0.078	6.85	12.84	5.72	0.05	1.341	98.888	1.80701	0.97504	0.0132004	0.00249884	0.2167	0.724094	0.254995	0.00149527	0.0381575	4.03319	0.769663	2.0645	1.92133	2.20606	1060.66	1054.53	1068.35
1373	Line 8 20MAL08b-28284-area2	20MAL08b-28284	2	SLV	SLVa	45.44	23.8	0.186	0.085	7.85	11.26	7.42	0	1.94	98.008	1.7475	0.98057	0.0138676	0.00276845	0.252472	0.64557	0.33629	0	0.0561213	4.03516	0.718864	1.68429	1.34709	2.04886	1069.18	1062.81	1075.99
1374	Line 10 20MAL08b-28284-area2	20MAL08b-28284	2	SLV	SLVa	46.39	23.66	0.196	0.098	7.4	12.02	6.59	0.022	1.75	98.135	1.77493	0.969827	0.0145386	0.00317557	0.236784	0.685625	0.297148	0.000665465	0.0503665	4.03306	0.743298	1.46299	1.21838	1.74832	1076.67	1070.58	1082.63
1375	Line 11 20MAL08b-28284-area2	20MAL08b-28284	2	SLV	SLVa	47.93	23.83	0.175	0.082	6.78	12.79	5.41	0	1.321	98.343	1.82108	0.96999	0.0128904	0.0026386	0.215434	0.724464	0.242242	0	0.0377546	4.02649	0.77079	2.09729	1.96188	2.23796	1067.41	1062.13	1074.69
1376	Line 12 20MAL08b-28284-area2	20MAL08b-28284	2	SLV	SLVa	48.77	24.14	0.148	0.074	6.24	13.3	4.82	0	1.173	98.674	1.84108	0.976288	0.0108315	0.00236586	0.197	0.748506	0.214435	0	0.0333091	4.02381	0.791646	2.40948	2.22007	2.5773	1078.59	1073.44	1085.57
1377	Line 13 20MAL08b-28284-area2	20MAL08b-28284	2	SLV	SLVa	47.63	23.88	0.166	0.079	6.99	12.54	5.64	0	1.444	98.398	1.81155	0.97303	0.0122401	0.0025447	0.222337	0.711038	0.252801	0	0.0413127	4.02686	0.761793	2.10094	1.9855	2.215	1067.93	1061.78	1074.05
1378	Line 14 20MAL08b-28284-area2	20MAL08b-28284	2	SLV	SLVa	48.11	23.92	0.144	0.075	6.84	12.93	5.4	0	1.275	98.694	1.82109	0.970014	0.0105673	0.00240434	0.216528	0.729656	0.24089	0	0.0363037	4.02745	0.771156	2.23828	2.13446	2.41823	1067.15	1062.66	1072.91
1379	Line 15 20MAL08b-28284-area2	20MAL08b-28284	2	SLV	SLVa	48.46	24.13	0.185	0.086	6.37	13.1	4.99	0.034	1.183	98.612	1.8342	0.978459	0.0135751	0.00275677	0.201635	0.739196	0.222584	0.00101739	0.0336817	4.0271	0.785684	2.11836	1.97115	2.27311	1073.08	1067.08	1078.63
1380	Line 16 20MAL08b-28284-area2	20MAL08b-28284	2	SLV	SLVa	47.48	23.94	0.212	0.077	7.54	12.18	5.66	0	1.299	98.479	1.81104	0.97828	0.0156769	0.00248741	0.240521	0.692611	0.254427	0	0.0372711	4.03231	0.742244	2.01943	1.89916	2.16137	1053.33	1049.22	1059.41
1381	Line 17 20MAL08b-28284-area2	20MAL08b-28284	2	SLV	SLVa	46.44	24.32	0.199	0.108	7.4	12.34	5.73	0	1.37	98.186	1.78621	1.00214	0.0148389	0.00351807	0.238033	0.70759	0.259732	0	0.0396377	4.0517	0.748279	2.02353	1.90117	2.14706	1060.77	1054.89	1066.73
1382	Line 18 20MAL08b-28284-area2	20MAL08b-28284	2	SLV	SLVa	50.31	23.75	0.097	0.096	6.2	14.01	3.44	0	0.807	98.752	1.89128	0.956506	0.0070694	0.00305641	0.19492	0.785173	0.152402	0	0.0228203	4.01323	0.80112	2.57049	2.19362	2.80185	1082.43	1073.54	1095.38
1383	Line 19 20MAL08b-28284-area2	20MAL08b-28284	2	SLV	SLVa	50.54	23.93	0.098	0.116	6.2	14.02	3.33	0	0.75	99.031	1.89512	0.961313	0.00712418	0.00368381	0.194427	0.783742	0.147155	0	0.0211547	4.01371	0.801234	2.19797	1.96366	2.51649	1078.67	1069.24	1089.16
1384	Line 1 20MAL08b-28284-area8	20MAL08b-28284	8	SLV	SLVa	45.01	23.84	0.176	0.077	7.71	12.05	7.48	0.086	2.01	98.439	1.72499	0.978828	0.0130767	0.00249924	0.247113	0.688478	0.337839	0.00260568	0.0579456	4.05338	0.735875	1.16723	0.889584	1.52915	1075.6	1070.11	1080.74
1385	Line 2 20MAL08b-28284-area8	20MAL08b-28284	8	SLV	SLVa	46.61	24.02	0.139	0.092	6.69	12.91	6.13	0.101	1.5	98.212	1.77878	0.982061	0.0102841	0.00297351	0.213517	0.734505	0.275698	0.00304726	0.0430607	4.04393	0.774776	1.8401	1.61698	2.02649	1068.92	1063.05	1076.47
1386	Line 3 20MAL08b-28284-area8	20MAL08b-28284	8	SLV	SLVa	47.76	24.24	0.121	0.078	6.13	13.54	5.21	0.148	1.236	98.462	1.81104	0.984732	0.00889523	0.00250494	0.194396	0.765433	0.232826	0.00443681	0.0352556	4.03952	0.797468	2.27033	2.12318	2.451	1082.53	1075.9	1091.01
1387	Line 4 20MAL08b-28284-area8	20MAL08b-28284	8	SLV	SLVa	47.03	24	0.188	0.093	7.02	12.73	5.89	0.035	1.492	98.478	1.79071	0.979001	0.0138777	0.00299897	0.223538	0.722609	0.264299	0.00105357	0.0427332	4.04082	0.763739	1.90338	1.74143	2.04581	1069.04	1062.19	1077.86
1388	Line 5 20MAL08b-28284-area8	20MAL08b-28284	8	SLV	SLVa	47.02	24.02	0.189	0.076	6.79	12.95	6.05	0.025	1.57	98.706	1.78453	0.976644	0.0139063	0.00244283	0.215514	0.732717	0.270599	0.000750112	0.0448216	4.04193	0.77272	1.89407	1.69098	2.06904	1069.71	1062.45	1079.17
1389	Line 6 20MAL08b-28284-area8	20MAL08b-28284	8	SLV	SLVa	47.15	24.17	0.144	0.094	6.87	12.81	5.81	0.023	1.51	98.581	1.79249	0.984402	0.0106132	0.0030265	0.218421	0.726019	0.260304	0.000691268	0.0431814	4.03914	0.76873	2.07831	1.92778	2.19673	1079.32	1072.27	1088.69
1390	Line 7 20MAL08b-28284-area8	20MAL08b-28284	8	SLV	SLVa	47.24	24.08	0.15	0.08	6.85	12.75	5.43	0.019	1.553	98.157	1.80322	0.984732	0.0111004	0.00258624	0.218672	0.725562	0.24427	0.000573374	0.0445921	4.03531	0.768413	2.07335	1.9547	2.1771	1079.97	1073.63	1087.08
1391	Line 8 20MAL08b-28284-area8	20MAL08b-28284	8	SLV	SLVa	48.04	24.25	0.134	0.068	6.1	13.23	4.81	0.132	1.321	98.085	1.82755	0.988328	0.00988281	0.00219086	0.194071	0.75033	0.215647	0.00396996	0.0378021	4.02978	0.794503	1.98009	1.88371	2.13178	1076.46	1071.27	1082.56
1392	Line 11 20MAL08b-28284-area8	20MAL08b-28284	8	SLV	SLVa	48.99	24.23	0.223	0.096	6.08	13.33	4.28	0.054	1.019	98.312	1.8562	0.983539	0.0163806	0.00308054	0.192656	0.752959	0.191113	0.00161754	0.0290427	4.02659	0.796263	2.42699	2.25336	2.57585	1058.95	1052.62	1066.59
1393	Line 13 20MAL08b-28284-area8	20MAL08b-28284	8	SLV	SLVa	48	24.07	0.208	0.097	6.56	12.77	5.32	0.04	1.451	98.558	1.82014	0.977828	0.015291	0.00311512	0.208033	0.721905	0.237742	0.00119914	0.0413883	4.02664	0.776294	1.86273	1.7495	1.97557	1077.22	1069.34	1084.15
1394	Line 2 20MAL08b-28284-area9	20MAL08b-28284	9	SLV	SLVa	43.99	23.81	0.234	0.152	9.95	9.54	8.24	0.02	2.11	98.158	1.71221	0.99285	0.0176574	0.00501054	0.323884	0.553574	0.377972	0.000615428	0.0617776	4.04555	0.630884	1.62065	1.34668	1.88973	1034.03	1024.29	1042.97
1395	Line 3 20MAL08b-28284-area9	20MAL08b-28284	9	SLV	SLVa	46.06	23.93	0.189	0.124	9.19	10.85	6.11	0	1.75	98.311	1.77907	0.990223	0.0141527	0.00405629	0.296857	0.624774	0.278125	0	0.0508455	4.0381	0.6779	1.80995	1.652	1.97017	1041.02	1027.92	1050.12
1396	Line 5 20MAL08b-28284-area9	20MAL08b-28284	9	SLV	SLVa	46.42	23.87	0.201	0.113	8.53	11.54	5.87	0	1.636	98.315	1.78677	0.984325	0.0149992	0.00368368	0.274585	0.662209	0.266276	0	0.0473689	4.04022	0.706888	1.84977	1.71144	2.00408	1055.51	1046.89	1061.33
1397	Line 6 20MAL08b-28284-area9	20MAL08b-28284	9	SLV	SLVa	46.34	23.78	0.191	0.118	8.13	11.93	5.75	0	1.59	98.008	1.78709	0.982481	0.0142801	0.003854	0.262207	0.685892	0.26133	0	0.0461247	4.04326	0.723439	1.85806	1.72786	2.02426	1058.45	1051.75	1064.87
1398	Line 8 20MAL08b-28284-area9	20MAL08b-28284	9	SLV	SLVa	49.17	23.9	0.174	0.09	6.49	13.81	3.73	0	1.017	98.45	1.86333	0.970309	0.0127834	0.0028885	0.205683	0.780205	0.166582	0	0.0289906	4.03078	0.791373	2.59125	2.38245	2.82435	1062.82	1058.03	1069.52
1399	Line 9 20MAL08b-28284-area9	20MAL08b-28284	9	SLV	SLVa	49.66	23.9	0.174	0.128	6.33	13.96	3.58	0.041	0.992	98.843	1.87188	0.965141	0.0127154	0.0040862	0.199544	0.784479	0.159032	0.0012218	0.0281274	4.02622	0.797216	2.54558	2.35246	2.71359	1062.35	1056.54	1070.55
1400	Line 10 20MAL08b-28284-area9	20MAL08b-28284	9	SLV	SLVa	49.67	23.92	0.144	0.13	6.08	14.03	3.39	0.06	0.964	98.428	1.87752	0.968664	0.0105526	0.00416171	0.192202	0.790629	0.151015	0.00179302	0.0274103	4.02394	0.804441	2.23962	1.81319	2.56053	1073.42	1065.63	1081.97
1401	Line 11 20MAL08b-28284-area9	20MAL08b-28284	9	SLV	SLVa	50.01	23.92	0.127	0.124	5.93	14.24	3.26	0.042	0.886	98.576	1.8847	0.965758	0.00927892	0.00395772	0.186898	0.800055	0.144788	0.00125135	0.0251169	4.0218	0.810632	1.9388	1.68729	2.24271	1089.34	1079.57	1099.08
1402	Line 12 20MAL08b-28284-area9	20MAL08b-28284	9	SLV	SLVa	50.33	24.07	0.094	0.093	5.52	14.6	2.7	0.054	0.802	98.322	1.89874	0.972827	0.00687502	0.00297139	0.174157	0.821137	0.120042	0.00161056	0.0227593	4.02112	0.82502	1.36034	1.23836	1.4905	1097.33	1091.91	1102.16
1403	Line 24 20MAL08b-28284-area9	20MAL08b-28284	9	SLV	SLVa	49.16	23.7	0.116	0.116	5.86	14.94	3.37	0.027	0.811	98.167	1.86325	0.962342	0.00852364	0.00372354	0.185746	0.844179	0.150529	0.000809036	0.023122	4.04222	0.819651	2.36901	2.02389	2.6636	1099.9	1089.03	1111.53
1404	Line 33 20MAL08b-28284-area9	20MAL08b-28284	9	SLV	SLVa	51.31	24.12	0.112	0.091	5.3	14.87	2.89	0.072	0.75	99.564	1.90543	0.959602	0.0080634	0.00286202	0.164601	0.823243	0.126479	0.00211383	0.0209507	4.01335	0.833374	1.49489	1.36395	1.61041	1092.91	1087.46	1098.19
1405	Line 34 20MAL08b-28284-area9	20MAL08b-28284	9	SLV	SLVa	51.42	24.1	0.06	0.088	5.47	14.7	3	0.057	0.773	99.71	1.90662	0.957351	0.00431312	0.00276346	0.169622	0.812596	0.131094	0.00167091	0.0215605	4.00759	0.827307	1.53598	1.43692	1.64273	1101.99	1095.99	1107
1406	Line 35 20MAL08b-28284-area9	20MAL08b-28284	9	SLV	SLVa	51.37	24.14	0.114	0.075	5.39	14.87	2.9	0.053	0.767	99.708	1.905	0.959058	0.00819594	0.00235551	0.167162	0.822094	0.12674	0.00155384	0.0213957	4.01355	0.831022	1.51677	1.37755	1.63999	1095.07	1089.94	1099.5
1407	Line 36 20MAL08b-28284-area9	20MAL08b-28284	9	SLV	SLVa	51.88	24.35	0.113	0.08	5.12	14.99	2.68	0.081	0.684	100.006	1.91538	0.96311	0.00808801	0.0025014	0.158084	0.825053	0.116606	0.0023642	0.0189958	4.01018	0.839204	1.39456	1.26591	1.60819	1085.12	1080.67	1089.25
1408	Line 37 20MAL08b-28284-area9	20MAL08b-28284	9	SLV	SLVa	51.25	24.27	0.127	0.117	5.94	14.23	3.07	0	0.733	99.774	1.90479	0.966374	0.00915094	0.0036828	0.184631	0.788466	0.134469	0	0.0204929	4.01206	0.810265	1.74836	1.60215	1.95213	1082.86	1072.29	1093.86
1409	Line 38 20MAL08b-28284-area9	20MAL08b-28284	9	SLV	SLVa	51.05	24.18	0.153	0.108	5.92	14.27	3.08	0.043	0.748	99.586	1.90142	0.96485	0.0110479	0.00340678	0.184403	0.792375	0.135196	0.00126618	0.020957	4.01492	0.811213	1.65466	1.51398	1.86283	1080.27	1070.97	1089.83
1410	Line 39 20MAL08b-28284-area9	20MAL08b-28284	9	SLV	SLVa	51.16	24.16	0.124	0.119	5.75	14.46	3.01	0.04	0.744	99.604	1.9033	0.962931	0.00894348	0.0037494	0.178899	0.801991	0.131969	0.00117647	0.0208207	4.01378	0.817616	1.6826	1.56047	1.8094	1092.29	1082.07	1101.26
1411	Line 40 20MAL08b-28284-area9	20MAL08b-28284	9	SLV	SLVa	51.19	24.26	0.101	0.101	5.57	14.52	3.06	0.023	0.744	99.58	1.9028	0.966098	0.00727844	0.00317957	0.173152	0.804637	0.134048	0.000675898	0.0208031	4.01267	0.822915	1.81595	1.68901	1.99439	1111.12	1101.58	1118.78
1412	Line 41 20MAL08b-28284-area9	20MAL08b-28284	9	SLV	SLVa	51.93	24.31	0.117	0.119	5.23	14.82	2.61	0	0.655	99.838	1.92114	0.963489	0.0083914	0.00372843	0.16181	0.81736	0.113792	0	0.0182275	4.00794	0.834748	1.87125	1.62251	2.08449	1089.64	1083.82	1095.38
1413	Line 42 20MAL08b-28284-area9	20MAL08b-28284	9	SLV	SLVa	51.07	24.27	0.09	0.094	5.93	14.46	3.06	0	0.771	99.774	1.89859	0.966621	0.00648658	0.00295959	0.184367	0.801416	0.134065	0	0.0215608	4.01606	0.812974	1.67391	1.53263	1.86494	1095.96	1085.4	1105.83
1414	Line 43 20MAL08b-28284-area9	20MAL08b-28284	9	SLV	SLVa	51.1	24.3	0.084	0.12	5.86	14.39	3.07	0	0.785	99.741	1.89989	0.967911	0.00605473	0.00377857	0.182208	0.797614	0.134517	0	0.0219545	4.01393	0.814039	1.67472	1.53444	1.87337	1095.52	1084.28	1104.73
1415	Line 44 20MAL08b-28284-area9	20MAL08b-28284	9	SLV	SLVa	51.42	24.29	0.12	0.121	5.68	14.45	2.92	0.028	0.741	99.826	1.90817	0.965683	0.00863326	0.00380285	0.176278	0.799425	0.127702	0.000821463	0.0206847	4.0112	0.819333	1.6834	1.55449	1.79279	1098.07	1088.94	1106.61
1416	Line 45 20MAL08b-28284-area9	20MAL08b-28284	9	SLV	SLVa	50.92	24.29	0.123	0.151	6.03	14.23	3.16	0.023	0.785	99.719	1.89574	0.968813	0.00887777	0.00476109	0.187746	0.789806	0.138646	0.000676961	0.021984	4.01705	0.807942	1.74072	1.51714	1.99752	1085.51	1075.67	1096.31
1417	Line 46 20MAL08b-28284-area9	20MAL08b-28284	9	SLV	SLVa	50.62	24.17	0.116	0.073	5.95	14.08	3.24	0.021	0.796	99.103	1.89559	0.969661	0.00842146	0.00231517	0.186338	0.786047	0.142987	0.000621706	0.0224223	4.0144	0.80837	2.10528	1.86741	2.31083	1095.65	1085.28	1107.97
1418	Line 47 20MAL08b-28284-area9	20MAL08b-28284	9	SLV	SLVa	50.88	24.11	0.127	0.114	6.01	14.2	3.26	0	0.811	99.586	1.89629	0.962668	0.00917634	0.00359833	0.187325	0.788988	0.143187	0	0.0227365	4.01397	0.80813	2.01818	1.77365	2.31272	1086.4	1076.05	1097.9
1419	Line 48 20MAL08b-28284-area9	20MAL08b-28284	9	SLV	SLVa	50.94	24.16	0.132	0.097	5.89	14.33	3.13	0	0.773	99.474	1.89887	0.964841	0.00953936	0.0030623	0.183618	0.796358	0.137503	0	0.0216752	4.01547	0.81263	1.78734	1.61472	2.02341	1090.47	1080.04	1101.41
1420	Line 49 20MAL08b-28284-area9	20MAL08b-28284	9	SLV	SLVa	50.92	24.08	0.124	0.113	5.81	14.3	3.14	0.032	0.785	99.336	1.89999	0.96259	0.00897002	0.00357092	0.181302	0.795471	0.138077	0.00094397	0.0220333	4.01295	0.814387	1.80132	1.6186	2.05082	1098.57	1088.11	1108.48
1421	Line 50 20MAL08b-28284-area9	20MAL08b-28284	9	SLV	SLVa	51.05	24.17	0.095	0.089	5.94	14.26	3.23	0.019	0.816	99.691	1.89838	0.96291	0.00684887	0.00280295	0.18473	0.790554	0.141553	0.000558581	0.0228257	4.01116	0.810589	2.05887	1.78304	2.26685	1104.27	1093.15	1115.18
1422	Line 51 20MAL08b-28284-area9	20MAL08b-28284	9	SLV	SLVa	50.51	24.1	0.124	0.106	5.91	14.08	3.35	0.032	0.84	99.086	1.89169	0.966967	0.00900332	0.00336215	0.185107	0.786141	0.147859	0.000947475	0.0236646	4.01474	0.809413	2.34093	2.04488	2.68514	1097.29	1086.21	1109.45
1423	Line 52 20MAL08b-28284-area9	20MAL08b-28284	9	SLV	SLVa	49.34	24.17	0.125	0.101	6.22	13.33	4.29	0.048	1.15	98.799	1.85925	0.975745	0.0091318	0.00322328	0.196016	0.748847	0.190513	0.00142996	0.0325973	4.01675	0.792545	2.78827	2.56938	3.01299	1078.4	1071.01	1086.51
1424	Line 58 20MAL08b-28284-area9	20MAL08b-28284	9	SLV	SLVa	49.07	23.82	0.146	0.1	6.28	13.54	5.13	0.042	1.297	99.438	1.83562	0.954621	0.0105884	0.00316815	0.196467	0.755111	0.226159	0.00124211	0.0364967	4.01948	0.793535	2.19839	2.105	2.34074	1082.21	1075.52	1089.03
1425	Line 59 20MAL08b-28284-area9	20MAL08b-28284	9	SLV	SLVa	48.4	24.03	0.175	0.087	6.47	13.08	5.32	0.072	1.338	98.972	1.82411	0.970245	0.0127865	0.00277692	0.203927	0.734917	0.236291	0.00214528	0.0379322	4.02513	0.78279	2.06013	1.90995	2.2135	1065.18	1058.8	1072.12
1426	Line 60 20MAL08b-28284-area9	20MAL08b-28284	9	SLV	SLVa	48.57	24.12	0.153	0.078	6.5	13.07	5.39	0.036	1.382	99.301	1.82405	0.970436	0.0111395	0.00248085	0.204148	0.731759	0.238554	0.00106885	0.0390411	4.02267	0.781872	2.16029	2.0648	2.26702	1077.68	1070.19	1085.7
1427	Line 61 20MAL08b-28284-area9	20MAL08b-28284	9	SLV	SLVa	48.89	24.15	0.15	0.074	6.3	13.35	5.29	0.093	1.341	99.655	1.82754	0.967132	0.0108704	0.0023427	0.196948	0.743966	0.233041	0.00274837	0.037707	4.02229	0.790685	2.01083	1.88469	2.15343	1068.82	1063.45	1074.83
1428	Line 62 20MAL08b-28284-area9	20MAL08b-28284	9	SLV	SLVa	48.88	24.21	0.149	0.082	6.09	13.52	5.2	0.113	1.295	99.546	1.82804	0.969998	0.0108031	0.00259721	0.190474	0.753799	0.229186	0.00334101	0.0364309	4.02467	0.798285	2.03822	1.91826	2.20078	1078.27	1071.92	1086.19
1429	Line 64 20MAL08b-28284-area9	20MAL08b-28284	9	SLV	SLVa	48.96	24.19	0.136	0.087	5.95	13.58	5.17	0.096	1.266	99.446	1.83119	0.969283	0.00986143	0.00275582	0.186112	0.757212	0.227884	0.00283863	0.0356183	4.02276	0.802707	2.071	1.95184	2.22636	1084.75	1076.32	1093.02
1430	Line 65 20MAL08b-28284-area9	20MAL08b-28284	9	SLV	SLVa	48.9	24.15	0.149	0.088	6.03	13.5	5.2	0.124	1.268	99.411	1.83023	0.968359	0.0108117	0.00278945	0.188746	0.75328	0.229367	0.00366914	0.0356996	4.02296	0.799638	2.08933	1.94854	2.26933	1080.69	1073.87	1089.49
1431	Line 1 20MAL08b-28284-area9	20MAL08b-28284	9	SLV	SLVa	45.4	20.89	1.146	0.149	10.11	8.8	10.17	0	1.87	98.658	1.73744	0.856473	0.0850249	0.00482923	0.32357	0.502066	0.458674	0	0.0538321	4.02191	0.608096	11.1894	10.4407	12.1257	962.411	949.028	974.981
1432	Line 2 20MAL08b-28284-area9	20MAL08b-28284	9	SLV	SLVa	46.21	23.8	0.192	0.102	8.84	11.33	7.1	0	1.77	99.444	1.75828	0.970179	0.0141632	0.00328694	0.281299	0.642699	0.318377	0	0.0506608	4.03895	0.695563	2.17674	1.83882	2.52138	1060.81	1051.26	1069.2
1433	Line 3 20MAL08b-28284-area9	20MAL08b-28284	9	SLV	SLVa	50.38	23.91	0.164	0.107	6.03	14.32	3.73	0.035	0.936	99.651	1.87682	0.954257	0.0118445	0.00337588	0.187865	0.795302	0.163758	0.00103081	0.0262293	4.02048	0.808919	2.93851	2.74913	3.13544	1082.35	1071.99	1094.33
1434	Line 4 20MAL08b-28284-area9	20MAL08b-28284	9	SLV	SLVa	50.87	24	0.133	0.133	6.05	14.56	3.28	0	0.85	99.902	1.88948	0.955024	0.00957725	0.0041838	0.187932	0.806245	0.143577	0	0.023749	4.01977	0.810968	1.91465	1.65199	2.29	1080.25	1071.72	1090.1
1435	Line 5 20MAL08b-28284-area9	20MAL08b-28284	9	SLV	SLVa	50.74	24.02	0.11	0.101	5.78	14.74	3.26	0.055	0.826	99.657	1.88759	0.957311	0.0079334	0.00318213	0.179825	0.817486	0.142924	0.00161758	0.0231145	4.02099	0.81969	1.99834	1.69734	2.33148	1099.67	1091.34	1107.26
1436	Line 6 20MAL08b-28284-area9	20MAL08b-28284	9	SLV	SLVa	50.71	23.89	0.124	0.111	5.96	14.52	3.53	0	0.859	99.768	1.88523	0.951498	0.00893717	0.00349488	0.185302	0.804751	0.154659	0	0.024022	4.01789	0.812836	2.79292	2.52474	2.97852	1094.4	1083.5	1105.44
1437	Line 7 20MAL08b-28284-area9	20MAL08b-28284	9	SLV	SLVa	50.98	23.99	0.162	0.121	5.78	14.62	3.34	0.02	0.84	99.888	1.89116	0.953412	0.0116507	0.00380148	0.179316	0.808539	0.146018	0.000586548	0.0234398	4.01792	0.818479	2.18924	1.9268	2.54517	1089.71	1078.92	1100.4
1438	Line 8 20MAL08b-28284-area9	20MAL08b-28284	9	SLV	SLVa	52	24.16	0.104	0.086	4.94	15.2	2.74	0.036	0.651	99.952	1.91747	0.95443	0.00743476	0.00268573	0.152341	0.835591	0.119071	0.00104948	0.0180573	4.00813	0.845798	1.81057	1.62835	1.99326	1094.8	1090.6	1099.45
1439	Line 9 20MAL08b-28284-area9	20MAL08b-28284	9	SLV	SLVa	50.88	23.96	0.166	0.124	5.46	14.58	3.08	0	0.742	99.013	1.90137	0.95924	0.0120264	0.00392445	0.170638	0.812271	0.135644	0	0.0208578	4.01597	0.826395	1.80582	1.66093	2.03013	1083.76	1075.02	1091.62
1440	Line 10 20MAL08b-28284-area9	20MAL08b-28284	9	SLV	SLVa	51.18	24.22	0.151	0.092	5.69	14.5	3	0.028	0.715	99.575	1.90355	0.965074	0.010888	0.00289795	0.176987	0.804003	0.131497	0.000823318	0.020004	4.01573	0.819584	1.73438	1.60454	1.87643	1090.03	1081.84	1098.23
1441	Line 11 20MAL08b-28284-area9	20MAL08b-28284	9	SLV	SLVa	48.45	24.01	0.184	0.085	6.57	13.12	5.4	0.042	1.386	99.278	1.82134	0.966966	0.0134098	0.00270617	0.20655	0.735285	0.239233	0.00124822	0.0391928	4.02593	0.780694	2.01505	1.8977	2.15414	1069.68	1062.49	1077.54
1442	Line 13 20MAL08b-28284-area9	20MAL08b-28284	9	SLV	SLVa	48.11	24.01	0.179	0.119	6.77	13.06	6.08	0.05	1.458	99.836	1.80019	0.962494	0.0129851	0.00377111	0.211854	0.728538	0.268113	0.0014791	0.0410381	4.03046	0.774717	1.87089	1.6706	2.05037	1061.63	1054.89	1069.64
1443	Line 1 20MAL08b-28284-area11	20MAL08b-28284	11	SLV	SLVa	44.19	23.69	0.259	0.127	9.32	9.73	9.12	0	1.81	98.394	1.70768	0.980775	0.019404	0.00415647	0.301205	0.560557	0.415343	0	0.0526147	4.04174	0.650478	2.67925	2.40088	2.94873	1020.07	1011.49	1033.25
1444	Line 2 20MAL08b-28284-area11	20MAL08b-28284	11	SLV	SLVa	49.6	23.8	0.176	0.109	6.41	13.69	4.2	0.029	1.007	99.066	1.86344	0.957929	0.012819	0.00346816	0.201398	0.766766	0.185957	0.000861345	0.0284584	4.0211	0.791979	2.73332	2.52591	2.94551	1063.22	1057.39	1071.06
1445	Line 3 20MAL08b-28284-area11	20MAL08b-28284	11	SLV	SLVa	49.98	23.96	0.173	0.126	6.43	13.89	3.77	0	0.913	99.274	1.87394	0.962429	0.0125752	0.00400101	0.20162	0.776403	0.166583	0	0.02575	4.0233	0.793849	2.79007	2.56795	3.02233	1060.92	1055.38	1068.25
1446	Line 4 20MAL08b-28284-area11	20MAL08b-28284	11	SLV	SLVa	51.33	24.24	0.116	0.107	5.55	14.55	2.99	0	0.691	99.579	1.90711	0.96485	0.00835549	0.00336688	0.17245	0.805923	0.13092	0	0.0193121	4.01229	0.823738	1.92658	1.78313	2.11985	1097.51	1089.32	1105.44
1447	Line 5 20MAL08b-28284-area11	20MAL08b-28284	11	SLV	SLVa	50.68	24.27	0.192	0.136	6.46	13.82	3.38	0	0.692	99.646	1.89241	0.97089	0.0138991	0.00430087	0.201732	0.769327	0.148739	0	0.0194371	4.02073	0.792256	2.11347	1.84712	2.33228	1051.04	1045.29	1057.65
1448	Line 6 20MAL08b-28284-area11	20MAL08b-28284	11	SLV	SLVa	50.51	24.24	0.108	0.112	5.46	14.23	3.43	0	0.74	98.982	1.8924	0.97295	0.00784455	0.0035538	0.171077	0.794814	0.151447	0	0.0208552	4.01494	0.822882	2.80403	2.50371	3.0043	1110.04	1100.64	1117.11
1449	Line 7 20MAL08b-28284-area11	20MAL08b-28284	11	SLV	SLVa	51.29	24.23	0.135	0.123	5.82	14.25	2.91	0	0.637	99.457	1.91158	0.967465	0.00975443	0.00388243	0.181404	0.791771	0.127815	0	0.0178585	4.01153	0.813596	2.11316	1.86153	2.31083	1075.13	1066.86	1083.82
1450	Line 8 20MAL08b-28284-area11	20MAL08b-28284	11	SLV	SLVa	50.72	24.17	0.141	0.138	6.28	13.78	3.42	0	0.722	99.371	1.8959	0.967909	0.0102179	0.00436871	0.196318	0.767909	0.150658	0	0.0203011	4.01358	0.796399	2.47058	2.17254	2.65346	1061.43	1054.51	1071.21
1451	Line 9 20MAL08b-28284-area11	20MAL08b-28284	11	SLV	SLVa	50.76	24.25	0.175	0.139	6.05	14.07	3.08	0	0.671	99.226	1.90021	0.972556	0.0127007	0.00440691	0.189409	0.785236	0.135882	0	0.0188951	4.0193	0.805664	1.73498	1.51792	1.94894	1061.28	1053.68	1068.58
1452	Line 10 20MAL08b-28284-area11	20MAL08b-28284	11	SLV	SLVa	50.65	24.31	0.203	0.145	6.72	13.41	3.29	0	0.683	99.417	1.89797	0.975924	0.0147473	0.00460167	0.210592	0.749139	0.14529	0	0.019252	4.01751	0.780572	1.84205	1.65647	2.0952	1044.36	1039.48	1049.04
1453	Line 11 20MAL08b-28284-area11	20MAL08b-28284	11	SLV	SLVa	48.48	25.25	0.191	0.117	6.34	12.63	3.68	0	0.699	99.063	1.86481	1.04053	0.0142434	0.00381151	0.203951	0.724271	0.166821	0	0.0202254	4.03867	0.780278	2.56794	2.43756	2.75693	1050.18	1039.75	1057.33
1454	Line 12 20MAL08b-28284-area11	20MAL08b-28284	11	SLV	SLVa	47.08	24.28	0.26	0.107	7.48	12.03	6.07	0	1.209	98.978	1.79633	0.992478	0.0192323	0.00345759	0.23868	0.684291	0.272941	0	0.0346995	4.04211	0.741401	2.23133	2.09239	2.39225	1061.41	1056.4	1066.64
1455	Line 13 20MAL08b-28284-area11	20MAL08b-28284	11	SLV	SLVa	50.84	24.22	0.149	0.122	5.93	14.14	3.46	0	0.75	99.647	1.89278	0.966032	0.0107545	0.00384675	0.184635	0.784819	0.15181	0	0.021004	4.01568	0.809548	2.59826	2.33818	2.80648	1081.04	1071.17	1091.71
1456	Line 14 20MAL08b-28284-area11	20MAL08b-28284	11	SLV	SLVa	48.16	24.31	0.115	0.119	7.47	12.59	5.25	0	1.073	99.108	1.82323	0.985967	0.00844037	0.00381541	0.236505	0.710569	0.234231	0	0.0305563	4.03332	0.750278	2.49385	2.40227	2.58052	1057.69	1053.41	1062.23
1457	Line 1 20MAL08b-28284-area10	20MAL08b-28284	10	SLV	SLVa	44.37	23.79	0.212	0.082	8.55	11.11	8.07	0.051	2.12	98.544	1.70949	0.981958	0.0158351	0.00267565	0.27549	0.638139	0.366421	0.00155343	0.0614411	4.053	0.698466	1.60305	1.21782	1.94992	1073.23	1067.48	1079.17
1458	Line 2 20MAL08b-28284-area10	20MAL08b-28284	10	SLV	SLVa	47.4	24.14	0.17	0.086	6.37	13.17	5.65	0.11	1.448	98.584	1.79821	0.981117	0.0125031	0.00276311	0.202099	0.744856	0.252604	0.00329913	0.0413215	4.03877	0.78658	2.06256	1.92232	2.19609	1067.16	1062.13	1073.23
1459	Line 4 20MAL08b-28284-area10	20MAL08b-28284	10	SLV	SLVa	48.53	24.25	0.157	0.101	5.69	13.75	4.67	0.13	1.13	98.408	1.83543	0.982563	0.0115116	0.00323509	0.179971	0.775272	0.208149	0.003887	0.0321478	4.03216	0.811597	2.33736	2.16065	2.48797	1085.49	1078.35	1091.85
1460	Line 5 20MAL08b-28284-area10	20MAL08b-28284	10	SLV	SLVa	48.29	24.27	0.158	0.084	6.2	13.19	4.92	0.072	1.209	98.402	1.83083	0.985786	0.0116133	0.00269718	0.196583	0.745523	0.21983	0.00215809	0.0344797	4.0295	0.791336	2.12188	1.9591	2.2959	1073.67	1067.89	1079.8
1461	Line 6 20MAL08b-28284-area10	20MAL08b-28284	10	SLV	SLVa	48.11	24.29	0.158	0.09	6.48	13	5.15	0	1.28	98.59	1.82348	0.986316	0.01161	0.002889	0.205402	0.734573	0.23004	0	0.0364941	4.03081	0.781481	2.14769	2.05272	2.3544	1078.61	1071.07	1084.99
1462	Line 7 20MAL08b-28284-area10	20MAL08b-28284	10	SLV	SLVa	47.42	24.11	0.139	0.095	6.66	12.8	5.58	0.024	1.446	98.278	1.80527	0.983332	0.010259	0.00306297	0.212041	0.726467	0.250349	0.000722333	0.0414091	4.03291	0.774066	2.15923	2.05545	2.25766	1084.91	1076.82	1093.13
1463	Line 8 20MAL08b-28284-area10	20MAL08b-28284	10	SLV	SLVa	48.22	24.39	0.128	0.077	6.18	13.35	5.08	0.037	1.223	98.686	1.82313	0.987928	0.00938231	0.00246559	0.195409	0.752485	0.226353	0.00110596	0.0347828	4.03304	0.79385	2.32341	2.18244	2.46188	1086.45	1080.32	1095.46
1464	Line 9 20MAL08b-28284-area10	20MAL08b-28284	10	SLV	SLVa	48.09	24.26	0.18	0.097	6.21	13.4	5.03	0.031	1.233	98.532	1.82181	0.984603	0.0132199	0.00311214	0.196745	0.756794	0.224567	0.000928442	0.0351364	4.03692	0.793669	2.09748	1.9589	2.23948	1078.96	1072.47	1086.26
1465	Line 10 20MAL08b-28284-area10	20MAL08b-28284	10	SLV	SLVa	48.67	24.3	0.141	0.092	6.34	13.21	5.19	0.023	1.314	99.299	1.82784	0.977698	0.0102661	0.00292619	0.199127	0.739612	0.229707	0.000682888	0.0371209	4.02498	0.787879	2.19711	2.11895	2.33201	1090.48	1084.33	1096.77
1466	Line 11 20MAL08b-28284-area10	20MAL08b-28284	10	SLV	SLVa	47.74	24.26	0.17	0.083	6.37	13.12	5.23	0.044	1.338	98.373	1.81403	0.987585	0.0125233	0.00267103	0.202425	0.743225	0.234204	0.00132178	0.0382441	4.03623	0.785941	2.08766	1.96237	2.21295	1075.7	1069.83	1082.58
1467	Line 12 20MAL08b-28284-area10	20MAL08b-28284	10	SLV	SLVa	47.78	24.21	0.204	0.108	6.48	12.81	5.52	0.027	1.456	98.605	1.81118	0.983181	0.0149918	0.0034672	0.205426	0.72392	0.246596	0.000809143	0.0415168	4.03109	0.778956	1.93441	1.82764	2.05244	1079.6	1072.22	1087.06
1468	Line 13 20MAL08b-28284-area10	20MAL08b-28284	10	SLV	SLVa	47.15	24.19	0.202	0.059	6.82	12.8	5.79	0.028	1.476	98.539	1.7935	0.985774	0.0148963	0.00190069	0.216954	0.725863	0.259554	0.00084202	0.042233	4.04152	0.769887	2.02844	1.87481	2.1372	1065.64	1059.28	1074.04
1469	Line 14 20MAL08b-28284-area10	20MAL08b-28284	10	SLV	SLVa	48.52	24.27	0.18	0.053	6.42	13.51	4.83	0	0.992	98.799	1.83324	0.982402	0.013185	0.00169595	0.20286	0.760988	0.215068	0	0.0281939	4.03763	0.789531	2.43367	2.31115	2.56862	1065.67	1060.36	1071.02
1470	Line 15 20MAL08b-28284-area10	20MAL08b-28284	10	SLV	SLVa	48.79	24.23	0.178	0.082	6.57	13.15	5.13	0	1.18	99.336	1.8328	0.975123	0.0129632	0.00260878	0.206402	0.736436	0.227108	0	0.0333436	4.02678	0.781085	2.19273	1.99701	2.37784	1069.22	1063.67	1076.04
1471	Line 16 20MAL08b-28284-area10	20MAL08b-28284	10	SLV	SLVa	47.68	24.25	0.186	0.044	6.86	12.62	5.7	0	1.42	98.792	1.80696	0.98457	0.0136658	0.00141223	0.217421	0.713013	0.254576	0	0.0404807	4.0321	0.766323	2.15213	2.00924	2.27093	1060.24	1055.16	1067.31
1472	Line 2 20MAL08b-28284-area12	20MAL08b-28284	12	SLV	SLVa	48.38	24.23	0.16	0.101	5.97	13.27	5.13	0.071	1.264	98.59	1.82808	0.980857	0.0117208	0.00323214	0.188655	0.747526	0.228443	0.00212097	0.0359272	4.02657	0.798484	2.10839	1.97695	2.27435	1078.57	1070.82	1086.9
1473	Line 3 20MAL08b-28284-area12	20MAL08b-28284	12	SLV	SLVa	48.81	24.21	0.123	0.112	5.94	13.46	5.18	0.027	1.252	99.129	1.83178	0.973376	0.00894906	0.00355976	0.186429	0.753067	0.229099	0.000801074	0.0353439	4.0224	0.801565	2.31073	2.20949	2.42357	1102.09	1091.64	1112.58
1474	Line 4 20MAL08b-28284-area12	20MAL08b-28284	12	SLV	SLVa	49.16	24	0.187	0.103	5.82	13.64	4.43	0.135	1.091	98.569	1.85352	0.969435	0.013669	0.00328898	0.183515	0.766699	0.196843	0.00402406	0.0309426	4.02194	0.80687	2.23329	2.05597	2.43521	1069.94	1063.93	1076.81
1475	Line 5 20MAL08b-28284-area12	20MAL08b-28284	12	SLV	SLVa	48.84	24.18	0.153	0.064	5.91	13.4	4.52	0.117	1.18	98.363	1.84754	0.979933	0.0112206	0.00205039	0.186969	0.755697	0.201505	0.00349904	0.0335773	4.02199	0.80166	2.23998	2.0525	2.42945	1072.57	1065.32	1080.2
1476	Line 6 20MAL08b-28284-area12	20MAL08b-28284	12	SLV	SLVa	48.71	24.19	0.115	0.064	6.26	13.34	4.72	0.068	1.223	98.696	1.83941	0.978627	0.0084191	0.00204681	0.197696	0.751001	0.210054	0.00203008	0.0347402	4.02402	0.791613	2.20525	2.06361	2.36071	1078.68	1073.08	1085.51
1477	Line 7 20MAL08b-28284-area12	20MAL08b-28284	12	SLV	SLVa	48.27	24.14	0.162	0.083	6.67	13.15	5.08	0.059	1.321	98.948	1.82324	0.976845	0.0118629	0.00265511	0.210696	0.740487	0.226131	0.00176183	0.0375332	4.03121	0.778491	2.03376	1.92255	2.17988	1068.14	1062.23	1075.22
1478	Line 8 20MAL08b-28284-area12	20MAL08b-28284	12	SLV	SLVa	47.8	24.09	0.127	0.074	6.76	13.07	5.33	0.034	1.387	98.682	1.81196	0.978317	0.00933325	0.0023757	0.214304	0.738621	0.23811	0.00101893	0.0395497	4.03359	0.775109	2.17779	2.09115	2.29363	1074.67	1068.46	1082.48
1479	Line 10 20MAL08b-28284-area12	20MAL08b-28284	12	SLV	SLVa	48.23	24.15	0.157	0.068	6.63	12.94	5.01	0.026	1.373	98.588	1.82769	0.980447	0.0115343	0.00218239	0.210117	0.731045	0.223745	0.000778939	0.0391383	4.02668	0.776747	2.05656	1.971	2.15629	1076.87	1069.84	1083.61
1480	Line 11 20MAL08b-28284-area12	20MAL08b-28284	12	SLV	SLVa	49.77	24.2	0.143	0.09	5.85	13.78	4.49	0.162	1.198	99.695	1.85422	0.9659	0.0103285	0.00283972	0.18227	0.765365	0.197138	0.0047715	0.0335736	4.01641	0.807658	2.35452	2.12087	2.55266	1079.03	1072.07	1086.32
1481	Line 2 20MAL08b-28284-area13	20MAL08b-28284	13	SLV	SLVa	41.15	23.51	0.283	0.125	10.56	8.39	10.4	0.03	3.57	98.075	1.61375	0.987737	0.021516	0.0041516	0.346334	0.490517	0.480652	0.000930108	0.105313	4.0509	0.586146	0.367539	0.0452188	0.890878	1006.33	996.404	1017.61
1482	Line 3 20MAL08b-28284-area13	20MAL08b-28284	13	SLV	SLVa	41.81	23.5	0.282	0.088	10.15	9.21	9.93	0	3.02	98.155	1.63469	0.98434	0.0213753	0.00291392	0.331883	0.536834	0.457546	0	0.0888196	4.0584	0.617962	1.16266	0.663373	1.54461	1010.17	996.793	1025.5
1483	Line 4 20MAL08b-28284-area13	20MAL08b-28284	13	SLV	SLVa	42.38	23.52	0.315	0.084	9.32	10.04	9.38	0.019	3.14	98.33	1.64663	0.979028	0.0237276	0.0027641	0.302841	0.58156	0.429505	0.000583625	0.0917723	4.05841	0.657575	0.235298	-0.203909	0.856646	1063.2	1052.18	1072.58
1484	Line 6 20MAL08b-28284-area13	20MAL08b-28284	13	SLV	SLVa	47.35	24.12	0.191	0.103	7.03	12.81	5.75	0	1.487	98.857	1.79593	0.980096	0.0140447	0.00330861	0.222991	0.724341	0.25702	0	0.0424255	4.04016	0.764611	1.89557	1.79226	2.03134	1067.92	1061.29	1074.53
1485	Line 7 20MAL08b-28284-area13	20MAL08b-28284	13	SLV	SLVa	48.31	24.2	0.147	0.075	6.53	13.29	5.14	0.048	1.319	99.059	1.82126	0.977399	0.0107439	0.00239461	0.205879	0.746938	0.228364	0.00143061	0.0374046	4.03181	0.783926	2.12228	2.02616	2.26562	1074.52	1067.82	1080.58
1486	Line 8 20MAL08b-28284-area13	20MAL08b-28284	13	SLV	SLVa	48.96	24.26	0.153	0.081	6	13.62	4.73	0.102	1.201	99.107	1.839	0.97623	0.0111414	0.0025767	0.188475	0.762678	0.209378	0.0030289	0.0339335	4.02644	0.801846	2.1008	1.94155	2.27145	1076.69	1070.36	1084.66
1487	Line 9 20MAL08b-28284-area13	20MAL08b-28284	13	SLV	SLVa	47.48	24.19	0.164	0.091	7.07	12.68	5.79	0.048	1.579	99.091	1.79627	0.980434	0.0120285	0.00291569	0.223689	0.715163	0.258148	0.00143564	0.0449354	4.03502	0.761742	1.83633	1.67797	1.98633	1073.1	1065.97	1080.53
1488	Line 10 20MAL08b-28284-area13	20MAL08b-28284	13	SLV	SLVa	48.12	24.24	0.161	0.095	6.86	12.77	5.33	0.018	1.444	99.06	1.81772	0.980972	0.0117906	0.00303923	0.216715	0.719147	0.237279	0.000537551	0.0410313	4.02823	0.768432	2.07768	1.96687	2.18055	1078.27	1071.44	1085.92
1489	Line 11 20MAL08b-28284-area13	20MAL08b-28284	13	SLV	SLVa	47.77	24.2	0.186	0.077	6.98	12.8	5.46	0	1.456	98.944	1.80863	0.981592	0.0136526	0.00246901	0.22101	0.722484	0.243622	0	0.0414669	4.03492	0.765753	1.93615	1.8141	2.06835	1067.06	1061.23	1073.49
1490	Line 1 20MAL13m-28317-area1c	20MAL13m-28317	1C	VSN	VSN0	45.08	22.77	0.747	0.582	14.37	7.3	7.07	0	1.011	98.933	1.77142	0.958569	0.0569072	0.0193687	0.472236	0.427648	0.327407	0	0.0298838	4.06344	0.475226	2.51001	2.19719	2.93092	791.302	787.048	796.127
1491	Line 2 20MAL13m-28317-area1c	20MAL13m-28317	1C	VSN	VSN0	43.32	22.83	0.65	0.557	14.86	6.8	8.12	0	1.585	98.73	1.7156	0.968624	0.0499056	0.0186819	0.492164	0.401477	0.378978	0	0.0472175	4.07265	0.44926	1.38862	1.26892	1.53121	805.371	801.305	811.221
1492	Line 3 20MAL13m-28317-area1c	20MAL13m-28317	1C	VSN	VSN0	42.73	22.89	0.681	0.441	14.74	6.78	8.32	0	1.74	98.344	1.7004	0.975855	0.0525379	0.0148626	0.490545	0.402228	0.390185	0	0.052085	4.07869	0.450538	1.38376	1.24811	1.55407	818.544	813.681	823.068
1493	Line 4 20MAL13m-28317-area1c	20MAL13m-28317	1C	VSN	VSN0	43.42	22.98	0.602	0.434	14.07	7.33	8.02	0	1.614	98.485	1.71722	0.973662	0.0461574	0.0145367	0.465365	0.432181	0.373801	0	0.048016	4.07094	0.481514	1.21844	1.16483	1.35765	829.978	825.481	836.805
1494	Line 5 20MAL13m-28317-area1c	20MAL13m-28317	1C	VSN	VSN0	43.69	23.05	0.655	0.469	13.77	7.49	7.87	0	1.505	98.5	1.72501	0.974993	0.050137	0.0156827	0.45468	0.440875	0.366196	0	0.0446983	4.07227	0.492292	1.30237	1.21159	1.48373	829.995	824.295	836.478
1495	Line 6 20MAL13m-28317-area1c	20MAL13m-28317	1C	VSN	VSN0	43.95	23.04	0.67	0.473	13.52	7.5	7.69	0	1.35	98.197	1.73777	0.975972	0.0513589	0.0158392	0.447068	0.442098	0.358335	0	0.0401525	4.06859	0.497206	1.49704	1.31992	1.85268	827.224	820.031	833.322
1496	Line 7 20MAL13m-28317-area1c	20MAL13m-28317	1C	VSN	VSN0	45.23	23.02	0.657	0.501	13.11	8.09	6.42	0.027	1.041	98.096	1.78358	0.972507	0.0502272	0.0167318	0.432346	0.475597	0.298353	0.000841732	0.0308789	4.06106	0.523818	2.21983	2.04592	2.44696	881.525	871.096	891.543
1497	Line 8 20MAL13m-28317-area1c	20MAL13m-28317	1C	VSN	VSN0	43.85	23	0.687	0.533	14.09	7.1	7.55	0	1.228	98.041	1.74215	0.978963	0.0529153	0.0179342	0.468156	0.420532	0.353503	0	0.0366996	4.07086	0.473206	1.87918	1.57533	2.34933	805.7	799.556	812.977
1498	Line 1 20MAL13m-28317-area2a	20MAL13m-28317	2A	VSN	VSN0	45.03	22.77	0.729	0.665	13.55	7.75	6.52	0	1.179	98.194	1.77856	0.963501	0.0558217	0.0222448	0.447579	0.456346	0.30349	0	0.035029	4.06257	0.504849	1.73236	1.50449	2.03323	786.921	784.623	790.388
1499	Line 3 20MAL13m-28317-area2a	20MAL13m-28317	2A	VSN	VSN0	46.47	22.96	0.711	0.611	12.72	8.44	5.62	0	1.084	98.629	1.81606	0.961283	0.0538686	0.0202226	0.415727	0.491728	0.258836	0	0.0318664	4.04959	0.541876	1.91845	1.68613	2.22095	803.579	798.008	811.114
1500	Line 4 20MAL13m-28317-area2a	20MAL13m-28317	2A	VSN	VSN0	46.87	23.14	0.654	0.59	12.17	8.99	5.21	0	0.961	98.585	1.82729	0.96649	0.0494309	0.0194806	0.396795	0.522513	0.239376	0	0.0281826	4.04956	0.568376	1.82906	1.56177	2.16243	816.75	809.361	825.488
[truncated: 3,613 more rows]

## Sheet: S4-Majors-Traces-SS  
Index_majors	Name	Sample	Crystal	Unit	Subunit_2	SiO2 (wt%)	CaO (wt%)	Na2O (wt%)	MnO (wt%)	FeO (wt%)	MgO (wt%)	Al2O3 (wt%)	Cr2O3 (wt%)	TiO2 (wt%)	OxideTotals (wt%)	Si_cat	Ca_cat	Na_cat	Mn_cat	Fe_cat	Mg_cat	Al_cat	Cr_cat	Ti_cat	Cations Sum	Mgnum	P (kbar)	16_Percentile - P (kbar)	84_Percentile - P (kbar)	T (C)	16_Percentile - T (C)	84_Percentile - T (C)	Index_2	Place	Sample_2	Unit_2	Subunit_2	Crystal_2	Spot (µm)	Experiment_name_2	Li7_ppm_mean	Li7_ppm_2SE(int)	Li7_ppm_LOD_Howell	Sc45_ppm_mean	Sc45_ppm_2SE(int)	Sc45_ppm_LOD_Howell	Ti47_ppm_mean	Ti47_ppm_2SE(int)	Ti47_ppm_LOD_Howell
[truncated: 264 more rows]
[truncated: 94 more columns]

[truncated: 1 more sheets: S5-Maps_info]
